# Supplementary material for: Human tNeurons reveal aging-linked proteostasis deficits driving Alzheimer’s phenotypes
Source: Research Square preprint supplement (doi:10.21203/rs.3.rs-4407236/v1), 2024-05-30
Supplement: Supplementary file 1 [file 52e53b4c0485b097e4b69b60.xlsx]

## Sheet: Legends
Table S4. TMT quantitative proteomics analysis of human tNeurons from young, aged and AD donors
(1) Mass spectrometry data acquisition parameters
(2) Sample information of human tNeurons utilized for mass spectrometry analysis
(3) List of all protein quants of young, aged, aged/sAD and fAD-PSEN1 tNeurons

## Sheet: (1) MS parameters
TMT ID	TMT-02
Experiment	tNeurons
Instrument	Lumos
MS runs	12
Method	FAIMS-RTS-MS3
Method duration (min)	90
FAIMS CV	-40/-60/-80
MS1 detector	Orbitrap
MS1 Resolution	60k
MS1 Scan Range (m/z)	400-1600
MS1 Max Inj Time (ms)	50
MS1 AGC Target	400k
MS2 Iso Window (Th)	0.6
CID Colision Energy (%)	35
MS2 detector	Ion Trap
MS2 Scan Rate	Turbo
MS2 Max Inj Time (ms)	35
MS2 AGC Target	10k
MS3 Iso Window (Th)	1.2
Maximum SPS ions	10
HCD Colision Energy (%)	55
MS3 detector	Orbitrap
MS3 Resolution	50k
MS3 Scan Range (m/z)	100-1000
MS3 Max Inj Time (ms)	200
MS3 AGC Target	250k

## Sheet: (2) Sample Information
	TMT-02
Run Ids	a22515-a22526
Experiment	tNeurons
TMT kit	TMTpro
Channel	Sample Information	Replicate
126	Young	1
127N	Young	2
127C	Young	3
128N	Aged	1
128C	Aged	2
129N	Aged	3
129C	Sporadic AD	1
130N	Sporadic AD	2
130C	Sporadic AD	3
131N	Sporadic AD	4
131C	Sporadic AD	5
132N	Sporadic AD	6
132C	familial AD with PSEN1 mutation	1
133N	familial AD with PSEN1 mutation	2
133C
134N
134C
135N

## Sheet: (3) tNeuron protein quants
Human tNeuron protein quants	Protein Id	Gene Symbol	Description	Group ID	Number of peptides	Young Average	Aged Average	Aged/sAD Average	fAD-PSEN1 Average	Aged vs. Young FC (log2)	Aged/sAD vs. Aged FC (log2)	Aged/sAD vs. Young FC (log2)	fAD-PSEN1 vs. Aged/sAD FC (log2)	fAD-PSEN1 vs. Young FC (log2)
	sp|P16671|CD36_HUMAN	CD36	Platelet glycoprotein 4 OS=Homo sapiens OX=9606 GN=CD36 PE=1 SV=2	1128	2	1.81527	26.223	2.00124	1.93887	3.85257	-3.71187	0.140708	-0.045682	0.0950256
	sp|Q01995|TAGL_HUMAN	TAGLN	Transgelin OS=Homo sapiens OX=9606 GN=TAGLN PE=1 SV=4	4077	14	1.12337	15.1676	6.12899	2.97517	3.75509	-1.30727	2.44782	-1.04268	1.40514
	sp|P51911|CNN1_HUMAN	CNN1	Calponin-1 OS=Homo sapiens OX=9606 GN=CNN1 PE=1 SV=2	1454	5	1.91505	17.3916	4.79219	4.14202	3.18294	-1.85964	1.3233	-0.21035	1.11295
	sp|P43121|MUC18_HUMAN	MCAM	Cell surface glycoprotein MUC18 OS=Homo sapiens OX=9606 GN=MCAM PE=1 SV=2	2347	4	2.62493	20.0716	3.97597	3.77449	2.9348	-2.33577	0.599029	-0.075028	0.524001
	sp|P29536|LMOD1_HUMAN	LMOD1	Leiomodin-1 OS=Homo sapiens OX=9606 GN=LMOD1 PE=1 SV=3	4188	5	1.72892	11.3826	8.95505	3.36592	2.71889	-0.346058	2.37283	-1.4117	0.961131
	sp|P67936-2|TPM4_HUMAN	TPM4	Isoform 2 of Tropomyosin alpha-4 chain OS=Homo sapiens OX=9606 GN=TPM4	837	2	0.64914	4.0095	13.0546	3.84823	2.62682	1.70307	4.32989	-1.76229	2.56759
	sp|Q96HC4|PDLI5_HUMAN	PDLIM5	PDZ and LIM domain protein 5 OS=Homo sapiens OX=9606 GN=PDLIM5 PE=1 SV=5	2570	13	2.46211	14.3833	5.58309	4.33854	2.54643	-1.36526	1.18117	-0.363856	0.817313
	sp|P21397|AOFA_HUMAN	MAOA	Amine oxidase [flavin-containing] A OS=Homo sapiens OX=9606 GN=MAOA PE=1 SV=1	4362	4	3.76262	19.9137	4.11058	2.15379	2.40395	-2.27635	0.127605	-0.932468	-0.804863
	sp|Q9Y6U3|ADSV_HUMAN	SCIN	Adseverin OS=Homo sapiens OX=9606 GN=SCIN PE=1 SV=4	1388	18	2.0975	11.0286	3.93027	6.42047	2.39451	-1.48855	0.905959	0.708052	1.61401
	sp|P55290-4|CAD13_HUMAN	CDH13	Isoform 4 of Cadherin-13 OS=Homo sapiens OX=9606 GN=CDH13	4005	5	3.30151	16.8251	4.97919	2.20713	2.34942	-1.75663	0.592785	-1.17374	-0.580958
	sp|P24844|MYL9_HUMAN	MYL9	Myosin regulatory light polypeptide 9 OS=Homo sapiens OX=9606 GN=MYL9 PE=1 SV=4	2812	5	2.77977	12.2676	6.9061	4.46287	2.14182	-0.82891	1.31291	-0.629899	0.683006
	sp|P56199|ITA1_HUMAN	ITGA1	Integrin alpha-1 OS=Homo sapiens OX=9606 GN=ITGA1 PE=1 SV=2	4254	9	3.17754	13.4511	6.60038	4.48566	2.08174	-1.0271	1.05464	-0.557231	0.497408
	sp|Q13683|ITA7_HUMAN	ITGA7	Integrin alpha-7 OS=Homo sapiens OX=9606 GN=ITGA7 PE=1 SV=3	526	4	2.1813	9.00047	8.65273	7.26921	2.04481	-0.0568462	1.98797	-0.251357	1.73661
	sp|O00194|RB27B_HUMAN	RAB27B	Ras-related protein Rab-27B OS=Homo sapiens OX=9606 GN=RAB27B PE=1 SV=4	2878	4	4.13204	14.9393	4.13726	6.14328	1.85419	-1.85237	0.00182082	0.570333	0.572154
	sp|O94911-3|ABCA8_HUMAN	ABCA8	Isoform 3 of ATP-binding cassette sub-family A member 8 OS=Homo sapiens OX=9606 GN=ABCA8	4402	3	2.98116	10.6508	6.03717	11.4405	1.83702	-0.819022	1.018	0.922205	1.9402
	sp|O95810|CAVN2_HUMAN	CAVIN2	Caveolae-associated protein 2 OS=Homo sapiens OX=9606 GN=CAVIN2 PE=1 SV=3	5431	5	3.50178	12.474	6.39413	5.01853	1.83276	-0.964101	0.868659	-0.349484	0.519175
	sp|Q15063|POSTN_HUMAN	POSTN	Periostin OS=Homo sapiens OX=9606 GN=POSTN PE=1 SV=2	5680	3	4.77865	16.5954	2.82352	9.46828	1.79611	-2.55522	-0.759108	1.74561	0.986498
	sp|P26006-1|ITA3_HUMAN	ITGA3	Isoform 2 of Integrin alpha-3 OS=Homo sapiens OX=9606 GN=ITGA3	6236	4	3.68078	12.423	4.53695	4.02208	1.75493	-1.45322	0.301711	-0.173782	0.12793
	sp|P35579|MYH9_HUMAN	MYH9	Myosin-9 OS=Homo sapiens OX=9606 GN=MYH9 PE=1 SV=4	179	29	3.51761	11.8424	6.27412	4.90536	1.75129	-0.916475	0.834818	-0.355053	0.479765
	sp|P52789|HXK2_HUMAN	HK2	Hexokinase-2 OS=Homo sapiens OX=9606 GN=HK2 PE=1 SV=2	414	8	4.87992	16.0749	4.33699	4.46832	1.71988	-1.89005	-0.170165	0.0430379	-0.127128
	sp|Q96CG8|CTHR1_HUMAN	CTHRC1	Collagen triple helix repeat-containing protein 1 OS=Homo sapiens OX=9606 GN=CTHRC1 PE=1 SV=1	5554	3	2.39291	7.66505	7.2665	2.59845	1.67953	-0.0770345	1.6025	-1.48361	0.118887
	sp|Q8WWM9|CYGB_HUMAN	CYGB	Cytoglobin OS=Homo sapiens OX=9606 GN=CYGB PE=1 SV=1	5164	8	4.88196	14.8646	5.71466	3.23619	1.60635	-1.37914	0.227207	-0.820372	-0.593165
	sp|Q16719|KYNU_HUMAN	KYNU	Kynureninase OS=Homo sapiens OX=9606 GN=KYNU PE=1 SV=1	3941	3	2.16137	6.49966	4.62692	4.52033	1.58842	-0.490312	1.0981	-0.033623	1.06448
	sp|Q14432|PDE3A_HUMAN	PDE3A	cGMP-inhibited 3',5'-cyclic phosphodiesterase A OS=Homo sapiens OX=9606 GN=PDE3A PE=1 SV=3	2138	6	4.04805	11.9266	7.99882	2.04155	1.55889	-0.576326	0.982559	-1.97012	-0.98756
	sp|P23469|PTPRE_HUMAN	PTPRE	Receptor-type tyrosine-protein phosphatase epsilon OS=Homo sapiens OX=9606 GN=PTPRE PE=1 SV=1	4028	2	3.35703	9.56881	8.51199	5.07526	1.51116	-0.168843	1.34231	-0.746014	0.596299
	sp|Q15758|AAAT_HUMAN	SLC1A5	Neutral amino acid transporter B(0) OS=Homo sapiens OX=9606 GN=SLC1A5 PE=1 SV=2	5169	6	4.20461	11.8853	5.84878	8.31879	1.49913	-1.02297	0.476163	0.508237	0.984401
	sp|Q9ULU8-4|CAPS1_HUMAN	CADPS	Isoform 4 of Calcium-dependent secretion activator 1 OS=Homo sapiens OX=9606 GN=CADPS	4711	2	2.19592	6.18305	9.76422	8.13891	1.49349	0.659187	2.15268	-0.262669	1.89001
	tr|F8VW96|F8VW96_HUMAN	CSRP2	Cysteine and glycine-rich protein 2 OS=Homo sapiens OX=9606 GN=CSRP2 PE=1 SV=1	3141	6	4.40598	12.17	6.70296	5.02712	1.4658	-0.860462	0.605334	-0.415065	0.19027
	sp|Q5VYS4|MEDAG_HUMAN	MEDAG	Mesenteric estrogen-dependent adipogenesis protein OS=Homo sapiens OX=9606 GN=MEDAG PE=2 SV=1	5633	4	3.15482	8.25784	4.73306	8.18882	1.38821	-0.802993	0.585213	0.790885	1.3761
	sp|Q16678|CP1B1_HUMAN	CYP1B1	Cytochrome P450 1B1 OS=Homo sapiens OX=9606 GN=CYP1B1 PE=1 SV=2	258	11	3.93168	10.2594	5.62244	4.70364	1.38373	-0.867685	0.51605	-0.25742	0.25863
	sp|O75369|FLNB_HUMAN	FLNB	Filamin-B OS=Homo sapiens OX=9606 GN=FLNB PE=1 SV=2	240	30	3.34466	8.70599	6.96826	6.4604	1.38015	-0.321211	1.05894	-0.109175	0.949765
	tr|J3QRS3|J3QRS3_HUMAN	MYL12A	Myosin regulatory light chain 12A OS=Homo sapiens OX=9606 GN=MYL12A PE=1 SV=1	2812	18	4.1729	10.73	6.42097	5.02805	1.36253	-0.740785	0.621742	-0.352793	0.268948
	sp|Q5T5P2|SKT_HUMAN	KIAA1217	Sickle tail protein homolog OS=Homo sapiens OX=9606 GN=KIAA1217 PE=1 SV=2	2524	8	4.30672	11.0665	6.73523	6.73447	1.36154	-0.716401	0.645138	-0.000163159	0.644975
	sp|Q8TB45|DPTOR_HUMAN	DEPTOR	DEP domain-containing mTOR-interacting protein OS=Homo sapiens OX=9606 GN=DEPTOR PE=1 SV=2	4447	4	2.88684	7.3893	6.94671	5.52151	1.35595	-0.0891081	1.26684	-0.331269	0.935569
	tr|A0A0S2Z4L3|A0A0S2Z4L3_HUMAN	PROS1	Protein S isoform 2 (Fragment) OS=Homo sapiens OX=9606 GN=PROS1 PE=1 SV=1	4325	2	3.90981	9.88712	6.93016	5.2436	1.33845	-0.512661	0.825789	-0.402332	0.423457
	sp|Q9UKX5-2|ITA11_HUMAN	ITGA11	Isoform 2 of Integrin alpha-11 OS=Homo sapiens OX=9606 GN=ITGA11	1539	4	3.62546	9.14703	6.48446	8.35695	1.33514	-0.496317	0.838822	0.365991	1.20481
	sp|Q13884|SNTB1_HUMAN	SNTB1	Beta-1-syntrophin OS=Homo sapiens OX=9606 GN=SNTB1 PE=1 SV=3	1428	2	5.36106	13.5167	5.0601	6.50313	1.33415	-1.4175	-0.0833505	0.361967	0.278617
	sp|P51606|RENBP_HUMAN	RENBP	N-acylglucosamine 2-epimerase OS=Homo sapiens OX=9606 GN=RENBP PE=1 SV=2	1374	2	4.88113	12.04	7.44184	2.29276	1.30255	-0.694107	0.608445	-1.69857	-1.09013
	sp|P50479|PDLI4_HUMAN	PDLIM4	PDZ and LIM domain protein 4 OS=Homo sapiens OX=9606 GN=PDLIM4 PE=1 SV=2	3223	7	3.90382	9.4582	7.10395	6.99489	1.27668	-0.412945	0.863734	-0.0223211	0.841413
	sp|P21333-2|FLNA_HUMAN	FLNA	Isoform 2 of Filamin-A OS=Homo sapiens OX=9606 GN=FLNA	240	26	4.53838	10.8348	6.72606	6.07158	1.25542	-0.687833	0.567586	-0.147691	0.419894
	sp|Q9NR12|PDLI7_HUMAN	PDLIM7	PDZ and LIM domain protein 7 OS=Homo sapiens OX=9606 GN=PDLIM7 PE=1 SV=1	1287	9	4.1697	9.95424	5.5974	5.06731	1.25537	-0.830555	0.424812	-0.143538	0.281274
	sp|P09493-6|TPM1_HUMAN	TPM1	Isoform 6 of Tropomyosin alpha-1 chain OS=Homo sapiens OX=9606 GN=TPM1	837	8	4.45963	10.6229	6.71039	4.83444	1.25218	-0.662707	0.589475	-0.47305	0.116424
	sp|Q12965|MYO1E_HUMAN	MYO1E	Unconventional myosin-Ie OS=Homo sapiens OX=9606 GN=MYO1E PE=1 SV=2	396	11	3.81482	9.0394	6.85243	7.54987	1.24461	-0.399613	0.845001	0.139836	0.984837
	sp|P09493-3|TPM1_HUMAN	TPM1	Isoform 3 of Tropomyosin alpha-1 chain OS=Homo sapiens OX=9606 GN=TPM1	837	3	4.32469	10.2336	5.90229	5.18092	1.24265	-0.793969	0.448679	-0.188067	0.260613
	sp|Q96IZ0|PAWR_HUMAN	PAWR	PRKC apoptosis WT1 regulator protein OS=Homo sapiens OX=9606 GN=PAWR PE=1 SV=1	3965	4	3.8826	9.11479	7.29365	6.18835	1.23119	-0.321569	0.909617	-0.237085	0.672532
	sp|Q14392|LRC32_HUMAN	LRRC32	Transforming growth factor beta activator LRRC32 OS=Homo sapiens OX=9606 GN=LRRC32 PE=1 SV=1	4041	7	3.06486	7.19166	5.85897	5.88529	1.2305	-0.295678	0.934825	0.00646726	0.941292
	tr|Q5TCU8|Q5TCU8_HUMAN	TPM2	Tropomyosin beta chain OS=Homo sapiens OX=9606 GN=TPM2 PE=1 SV=1	837	17	4.3867	10.2921	6.65131	5.45101	1.23033	-0.629828	0.600501	-0.287114	0.313388
	tr|A7XZE4|A7XZE4_HUMAN	TPM2	Beta tropomyosin isoform OS=Homo sapiens OX=9606 GN=TPM2 PE=1 SV=1	837	2	4.96507	11.6457	6.54777	5.4405	1.22991	-0.830722	0.399189	-0.267264	0.131924
	sp|Q7Z406-2|MYH14_HUMAN	MYH14	Isoform 2 of Myosin-14 OS=Homo sapiens OX=9606 GN=MYH14	179	9	4.36685	10.0741	6.01787	5.09272	1.20598	-0.743318	0.462662	-0.240816	0.221846
	sp|Q05682|CALD1_HUMAN	CALD1	Caldesmon OS=Homo sapiens OX=9606 GN=CALD1 PE=1 SV=3	3522	16	4.52955	10.2243	7.02761	5.97813	1.17457	-0.540901	0.633667	-0.23334	0.400327
	sp|A7MBM2|DISP2_HUMAN	DISP2	Protein dispatched homolog 2 OS=Homo sapiens OX=9606 GN=DISP2 PE=2 SV=2	6795	2	4.59806	10.375	6.76707	7.23914	1.17402	-0.61651	0.557507	0.0972859	0.654793
	sp|O00622|CCN1_HUMAN	CCN1	CCN family member 1 OS=Homo sapiens OX=9606 GN=CCN1 PE=1 SV=1	2545	7	5.80456	13.0773	5.64197	4.75127	1.17181	-1.21279	-0.0409885	-0.247884	-0.288873
	sp|P21291|CSRP1_HUMAN	CSRP1	Cysteine and glycine-rich protein 1 OS=Homo sapiens OX=9606 GN=CSRP1 PE=1 SV=3	3420	9	4.79451	10.7026	6.45221	6.88399	1.15851	-0.730098	0.428409	0.0934509	0.52186
	sp|P05362|ICAM1_HUMAN	ICAM1	Intercellular adhesion molecule 1 OS=Homo sapiens OX=9606 GN=ICAM1 PE=1 SV=2	2719	8	3.99635	8.9101	5.7868	2.74413	1.15676	-0.622677	0.534083	-1.07642	-0.542333
	sp|P48060|GLIP1_HUMAN	GLIPR1	Glioma pathogenesis-related protein 1 OS=Homo sapiens OX=9606 GN=GLIPR1 PE=1 SV=3	3289	2	4.6235	10.2997	7.47101	5.20226	1.15554	-0.463222	0.692316	-0.522163	0.170153
	sp|Q9BY89|K1671_HUMAN	KIAA1671	Uncharacterized protein KIAA1671 OS=Homo sapiens OX=9606 GN=KIAA1671 PE=1 SV=2	855	3	5.13552	11.4245	7.08644	3.90064	1.15355	-0.689	0.46455	-0.861351	-0.396801
	sp|Q99541|PLIN2_HUMAN	PLIN2	Perilipin-2 OS=Homo sapiens OX=9606 GN=PLIN2 PE=1 SV=2	5886	3	4.68344	10.3504	7.81483	4.00481	1.14404	-0.405396	0.738645	-0.964479	-0.225834
	sp|P04732-2|MT1E_HUMAN	MT1E	Isoform 2 of Metallothionein-1E OS=Homo sapiens OX=9606 GN=MT1E	6477	2	3.92958	8.67465	8.92078	4.33132	1.14243	0.0403648	1.18279	-1.04236	0.14043
	sp|Q9UMS6-2|SYNP2_HUMAN	SYNPO2	Isoform 2 of Synaptopodin-2 OS=Homo sapiens OX=9606 GN=SYNPO2	2412	9	3.8893	8.49185	9.31645	3.4789	1.12657	0.133701	1.26027	-1.42115	-0.160879
	sp|O60462|NRP2_HUMAN	NRP2	Neuropilin-2 OS=Homo sapiens OX=9606 GN=NRP2 PE=1 SV=3	5141	6	4.4044	9.60228	7.32466	7.01598	1.12443	-0.390615	0.733817	-0.0621172	0.6717
	sp|Q99715|COCA1_HUMAN	COL12A1	Collagen alpha-1(XII) chain OS=Homo sapiens OX=9606 GN=COL12A1 PE=1 SV=2	1196	25	3.84855	8.37731	6.78513	7.27981	1.12217	-0.304112	0.818061	0.101525	0.919586
	sp|P02462|CO4A1_HUMAN	COL4A1	Collagen alpha-1(IV) chain OS=Homo sapiens OX=9606 GN=COL4A1 PE=1 SV=4	1530	2	6.36593	13.7796	4.82156	5.31704	1.11409	-1.51496	-0.400872	0.141125	-0.259747
	sp|P67936|TPM4_HUMAN	TPM4	Tropomyosin alpha-4 chain OS=Homo sapiens OX=9606 GN=TPM4 PE=1 SV=3	837	4	4.96663	10.7407	6.88315	5.78956	1.11275	-0.641946	0.470802	-0.249615	0.221188
	tr|G3V1V0|G3V1V0_HUMAN	MYL6	Myosin light polypeptide 6 OS=Homo sapiens OX=9606 GN=MYL6 PE=1 SV=1	1041	9	4.60698	9.92902	6.55596	5.76028	1.10783	-0.598845	0.508985	-0.186667	0.322318
	sp|Q9BX59-7|TPSNR_HUMAN	TAPBPL	Isoform zeta of Tapasin-related protein OS=Homo sapiens OX=9606 GN=TAPBPL	4631	3	2.80268	6.03794	2.27995	2.92396	1.10725	-1.40506	-0.297808	0.358925	0.0611173
	sp|Q9UQ03|COR2B_HUMAN	CORO2B	Coronin-2B OS=Homo sapiens OX=9606 GN=CORO2B PE=1 SV=4	4170	5	4.25054	9.10842	6.78877	9.59524	1.09955	-0.424051	0.675503	0.49917	1.17467
	sp|P23141-2|EST1_HUMAN	CES1	Isoform 2 of Liver carboxylesterase 1 OS=Homo sapiens OX=9606 GN=CES1	1458	16	3.9963	8.55974	8.66453	0.5698	1.0989	0.0175546	1.11646	-3.9266	-2.81014
	sp|Q8TDB8-5|GTR14_HUMAN	SLC2A14	Isoform 5 of Solute carrier family 2, facilitated glucose transporter member 14 OS=Homo sapiens OX=9606 GN=SLC2A14	1150	3	3.77095	7.94883	3.90425	3.41564	1.07581	-1.0257	0.050118	-0.19289	-0.142772
	sp|P05186|PPBT_HUMAN	ALPL	Alkaline phosphatase, tissue-nonspecific isozyme OS=Homo sapiens OX=9606 GN=ALPL PE=1 SV=4	2262	4	4.80237	10.0298	2.37134	2.68199	1.06248	-2.08052	-1.01804	0.177599	-0.840442
	sp|P35520-2|CBS_HUMAN	CBS	Isoform 2 of Cystathionine beta-synthase OS=Homo sapiens OX=9606 GN=CBS	408	5	0.859768	1.78609	0.817639	1.13525	1.05479	-1.12727	-0.0724846	0.473475	0.400991
	sp|Q0ZGT2|NEXN_HUMAN	NEXN	Nexilin OS=Homo sapiens OX=9606 GN=NEXN PE=1 SV=1	968	9	5.12047	10.5577	6.50533	6.96683	1.04394	-0.698597	0.345344	0.0988802	0.444224
	sp|O75112-7|LDB3_HUMAN	LDB3	Isoform 7 of LIM domain-binding protein 3 OS=Homo sapiens OX=9606 GN=LDB3	3496	2	3.35626	6.86434	5.79392	3.77297	1.03227	-0.244582	0.787686	-0.618841	0.168846
	tr|A0A140T913|A0A140T913_HUMAN	HLA-A	HLA class I histocompatibility antigen, A-3 alpha chain OS=Homo sapiens OX=9606 GN=HLA-A PE=1 SV=1	2284	6	7.64775	15.5685	0.67397	5.46937	1.02552	-4.5298	-3.50428	3.02062	-0.483661
	tr|A0A2R8YE63|A0A2R8YE63_HUMAN	EPS8	Epidermal growth factor receptor kinase substrate 8 OS=Homo sapiens OX=9606 GN=EPS8 PE=1 SV=1	2286	11	3.73836	7.60104	5.6334	5.80647	1.02379	-0.432191	0.591599	0.0436571	0.635256
	sp|P35052|GPC1_HUMAN	GPC1	Glypican-1 OS=Homo sapiens OX=9606 GN=GPC1 PE=1 SV=2	5544	3	4.78061	9.7068	6.88398	7.61694	1.0218	-0.495752	0.526048	0.145969	0.672017
	sp|P50135|HNMT_HUMAN	HNMT	Histamine N-methyltransferase OS=Homo sapiens OX=9606 GN=HNMT PE=1 SV=1	4047	5	3.89233	7.8978	6.76554	5.35626	1.02082	-0.223247	0.79757	-0.336978	0.460592
	sp|P21980|TGM2_HUMAN	TGM2	Protein-glutamine gamma-glutamyltransferase 2 OS=Homo sapiens OX=9606 GN=TGM2 PE=1 SV=2	2013	24	3.97941	8.03169	8.67938	3.13004	1.01315	0.111888	1.12504	-1.47141	-0.346375
	sp|Q9BYX2|TBD2A_HUMAN	TBC1D2	TBC1 domain family member 2A OS=Homo sapiens OX=9606 GN=TBC1D2 PE=1 SV=3	2680	4	6.90846	13.8404	5.05823	3.70195	1.00245	-1.45218	-0.449731	-0.450346	-0.900077
	sp|Q9H773|DCTP1_HUMAN	DCTPP1	dCTP pyrophosphatase 1 OS=Homo sapiens OX=9606 GN=DCTPP1 PE=1 SV=1	5450	3	5.28611	10.4566	6.95239	5.5288	0.984134	-0.588833	0.395301	-0.330543	0.0647577
	sp|P54687-5|BCAT1_HUMAN	BCAT1	Isoform 5 of Branched-chain-amino-acid aminotransferase, cytosolic OS=Homo sapiens OX=9606 GN=BCAT1	2778	5	2.90356	5.71802	5.96766	7.09487	0.97769	0.0616493	1.03934	0.249611	1.28895
	sp|Q00587|BORG5_HUMAN	CDC42EP1	Cdc42 effector protein 1 OS=Homo sapiens OX=9606 GN=CDC42EP1 PE=1 SV=1	5737	4	4.6676	9.16855	6.24392	7.55586	0.974013	-0.55424	0.419772	0.275144	0.694916
	sp|P51649-2|SSDH_HUMAN	ALDH5A1	Isoform 2 of Succinate-semialdehyde dehydrogenase, mitochondrial OS=Homo sapiens OX=9606 GN=ALDH5A1	555	5	5.70775	11.1996	7.53956	2.02022	0.97246	-0.570901	0.401559	-1.89997	-1.49841
	sp|P02511|CRYAB_HUMAN	CRYAB	Alpha-crystallin B chain OS=Homo sapiens OX=9606 GN=CRYAB PE=1 SV=2	2430	5	4.65378	8.99182	8.08752	5.26902	0.950211	-0.152916	0.797295	-0.618162	0.179133
	sp|Q9NP74|PALMD_HUMAN	PALMD	Palmdelphin OS=Homo sapiens OX=9606 GN=PALMD PE=1 SV=1	917	8	4.98816	9.59883	5.35474	5.30419	0.94435	-0.842043	0.102308	-0.0136841	0.0886237
	sp|P52790|HXK3_HUMAN	HK3	Hexokinase-3 OS=Homo sapiens OX=9606 GN=HK3 PE=1 SV=2	414	3	6.088	11.6947	5.70953	6.19725	0.941819	-1.03442	-0.0925959	0.118255	0.025659
	sp|Q7Z5R6|AB1IP_HUMAN	APBB1IP	Amyloid beta A4 precursor protein-binding family B member 1-interacting protein OS=Homo sapiens OX=9606 GN=APBB1IP PE=1 SV=1	930	4	4.09769	7.86162	9.36765	3.95808	0.940017	0.252861	1.19288	-1.24289	-0.0500107
	sp|Q96JY6-5|PDLI2_HUMAN	PDLIM2	Isoform 5 of PDZ and LIM domain protein 2 OS=Homo sapiens OX=9606 GN=PDLIM2	5650	2	4.62479	8.85774	7.28912	7.90884	0.93755	-0.281195	0.656355	0.117722	0.774077
	sp|Q86XE0|SNX32_HUMAN	SNX32	Sorting nexin-32 OS=Homo sapiens OX=9606 GN=SNX32 PE=1 SV=1	1934	2	5.75187	10.9819	6.61121	5.06571	0.933025	-0.732142	0.200883	-0.384148	-0.183265
	sp|Q9BX69|CARD6_HUMAN	CARD6	Caspase recruitment domain-containing protein 6 OS=Homo sapiens OX=9606 GN=CARD6 PE=1 SV=2	5970	2	3.79482	7.22778	9.35364	5.40522	0.929522	0.371974	1.3015	-0.791175	0.510321
	sp|Q01813|PFKAP_HUMAN	PFKP	ATP-dependent 6-phosphofructokinase, platelet type OS=Homo sapiens OX=9606 GN=PFKP PE=1 SV=2	91	17	5.08229	9.63825	7.42074	4.17947	0.923291	-0.377207	0.546084	-0.828244	-0.28216
	sp|P02795|MT2_HUMAN	MT2A	Metallothionein-2 OS=Homo sapiens OX=9606 GN=MT2A PE=1 SV=1	6477	7	4.05315	7.65141	8.43767	3.58126	0.916681	0.14112	1.0578	-1.23638	-0.178578
	sp|Q9NZU5|LMCD1_HUMAN	LMCD1	LIM and cysteine-rich domains protein 1 OS=Homo sapiens OX=9606 GN=LMCD1 PE=1 SV=1	3412	14	3.96414	7.47164	7.22884	7.51694	0.914417	-0.0476605	0.866757	0.05638	0.923137
	sp|Q99650|OSMR_HUMAN	OSMR	Oncostatin-M-specific receptor subunit beta OS=Homo sapiens OX=9606 GN=OSMR PE=1 SV=1	2943	2	5.91402	11.1244	6.36149	5.3579	0.911518	-0.806292	0.105226	-0.247697	-0.142471
	sp|Q06278|AOXA_HUMAN	AOX1	Aldehyde oxidase OS=Homo sapiens OX=9606 GN=AOX1 PE=1 SV=2	1365	22	4.68342	8.80957	9.03187	2.36129	0.911511	0.0359531	0.947464	-1.93545	-0.987986
	tr|E9PGN7|E9PGN7_HUMAN	SERPING1	Plasma protease C1 inhibitor OS=Homo sapiens OX=9606 GN=SERPING1 PE=1 SV=1	5424	3	5.90864	11.0785	6.21697	5.86837	0.906868	-0.833481	0.0733867	-0.0832522	-0.00986545
	sp|Q16270|IBP7_HUMAN	IGFBP7	Insulin-like growth factor-binding protein 7 OS=Homo sapiens OX=9606 GN=IGFBP7 PE=1 SV=1	1291	4	7.75375	14.5108	4.68866	2.53728	0.904158	-1.62988	-0.725718	-0.885893	-1.61161
	tr|B4DUT8|B4DUT8_HUMAN	CNN2	Calponin OS=Homo sapiens OX=9606 GN=CNN2 PE=1 SV=1	1454	11	4.64777	8.68153	5.73519	5.23803	0.90141	-0.598108	0.303302	-0.130816	0.172486
	sp|Q8WUP2-2|FBLI1_HUMAN	FBLIM1	Isoform 2 of Filamin-binding LIM protein 1 OS=Homo sapiens OX=9606 GN=FBLIM1	3260	4	4.42431	8.24245	5.79443	4.45867	0.89762	-0.508408	0.389212	-0.378052	0.0111599
	sp|Q8TCD5|NT5C_HUMAN	NT5C	5'(3')-deoxyribonucleotidase, cytosolic type OS=Homo sapiens OX=9606 GN=NT5C PE=1 SV=2	4954	3	3.4315	6.3084	5.94316	7.5579	0.878432	-0.0860436	0.792389	0.346756	1.13914
	sp|Q9UHE8|STEA1_HUMAN	STEAP1	Metalloreductase STEAP1 OS=Homo sapiens OX=9606 GN=STEAP1 PE=2 SV=1	3937	2	3.93093	7.132	7.08092	9.69037	0.859437	-0.0103696	0.849067	0.452616	1.30168
	sp|P49753|ACOT2_HUMAN	ACOT2	Acyl-coenzyme A thioesterase 2, mitochondrial OS=Homo sapiens OX=9606 GN=ACOT2 PE=1 SV=6	804	18	4.49765	8.14707	7.28063	6.09727	0.857109	-0.162217	0.694891	-0.255902	0.43899
	sp|P16870|CBPE_HUMAN	CPE	Carboxypeptidase E OS=Homo sapiens OX=9606 GN=CPE PE=1 SV=1	458	3	6.18473	11.1115	5.41422	7.81298	0.845275	-1.03723	-0.191958	0.52912	0.337162
	tr|A0A075B6G3|A0A075B6G3_HUMAN	DMD	Dystrophin OS=Homo sapiens OX=9606 GN=DMD PE=1 SV=1	685	8	4.75328	8.53438	6.98907	9.10132	0.844363	-0.288185	0.556178	0.380975	0.937153
	sp|Q86UQ4-4|ABCAD_HUMAN	ABCA13	Isoform 4 of ATP-binding cassette sub-family A member 13 OS=Homo sapiens OX=9606 GN=ABCA13	156	3	6.2028	11.1199	6.33143	5.0217	0.84215	-0.812538	0.0296122	-0.334357	-0.304745
	sp|Q9NSY2|STAR5_HUMAN	STARD5	StAR-related lipid transfer protein 5 OS=Homo sapiens OX=9606 GN=STARD5 PE=1 SV=2	3761	4	4.13205	7.40436	4.17988	5.73386	0.841516	-0.824915	0.0166009	0.456047	0.472648
	sp|P08910|ABHD2_HUMAN	ABHD2	Monoacylglycerol lipase ABHD2 OS=Homo sapiens OX=9606 GN=ABHD2 PE=1 SV=1	5204	5	5.55784	9.93113	6.4566	5.4777	0.837434	-0.621183	0.216251	-0.237205	-0.020954
	sp|P13797|PLST_HUMAN	PLS3	Plastin-3 OS=Homo sapiens OX=9606 GN=PLS3 PE=1 SV=4	1084	29	4.27665	7.61869	7.05182	7.04349	0.833063	-0.111548	0.721515	-0.00170554	0.719809
	sp|P01024|CO3_HUMAN	C3	Complement C3 OS=Homo sapiens OX=9606 GN=C3 PE=1 SV=2	1009	3	3.91	6.9241	7.40997	5.24055	0.824457	0.0978425	0.9223	-0.49975	0.42255
	sp|Q15847|ADIRF_HUMAN	ADIRF	Adipogenesis regulatory factor OS=Homo sapiens OX=9606 GN=ADIRF PE=1 SV=1	2189	3	5.53132	9.7939	7.05053	3.44482	0.824261	-0.474152	0.350109	-1.0333	-0.683192
	sp|Q8TD43|TRPM4_HUMAN	TRPM4	Transient receptor potential cation channel subfamily M member 4 OS=Homo sapiens OX=9606 GN=TRPM4 PE=1 SV=1	600	5	5.01696	8.8828	6.75936	5.60189	0.824201	-0.394127	0.430074	-0.270972	0.159102
	tr|A0A0A0MSG2|A0A0A0MSG2_HUMAN	FHL2	Four and a half LIM domains protein 2 OS=Homo sapiens OX=9606 GN=FHL2 PE=1 SV=1	3123	11	4.28308	7.57178	7.08503	4.62136	0.821984	-0.0958579	0.726126	-0.616456	0.10967
	sp|Q32MZ4|LRRF1_HUMAN	LRRFIP1	Leucine-rich repeat flightless-interacting protein 1 OS=Homo sapiens OX=9606 GN=LRRFIP1 PE=1 SV=2	1373	8	5.56688	9.80212	6.61002	4.91282	0.816225	-0.56844	0.247785	-0.428104	-0.180319
	sp|P56945-6|BCAR1_HUMAN	BCAR1	Isoform 6 of Breast cancer anti-estrogen resistance protein 1 OS=Homo sapiens OX=9606 GN=BCAR1	46	3	5.61325	9.83431	6.70383	6.71715	0.808987	-0.552838	0.256149	0.00286189	0.259011
	sp|Q9Y6M7-7|S4A7_HUMAN	SLC4A7	Isoform 7 of Sodium bicarbonate cotransporter 3 OS=Homo sapiens OX=9606 GN=SLC4A7	2358	2	5.79753	10.1394	6.26863	7.2887	0.806463	-0.693751	0.112712	0.21751	0.330222
	sp|Q56VL3|OCAD2_HUMAN	OCIAD2	OCIA domain-containing protein 2 OS=Homo sapiens OX=9606 GN=OCIAD2 PE=1 SV=1	5325	4	6.77	11.8299	6.0013	4.09623	0.805212	-0.979092	-0.17388	-0.55098	-0.72486
	sp|P43490|NAMPT_HUMAN	NAMPT	Nicotinamide phosphoribosyltransferase OS=Homo sapiens OX=9606 GN=NAMPT PE=1 SV=1	2965	24	5.20494	9.07946	5.93962	4.10916	0.802724	-0.612237	0.190487	-0.531526	-0.341039
	sp|Q9UGI8|TES_HUMAN	TES	Testin OS=Homo sapiens OX=9606 GN=TES PE=1 SV=1	3122	8	5.31757	9.21636	5.15632	6.57366	0.793429	-0.837855	-0.0444258	0.350355	0.305929
	sp|Q8TB22-2|SPT20_HUMAN	SPATA20	Isoform 2 of Spermatogenesis-associated protein 20 OS=Homo sapiens OX=9606 GN=SPATA20	2094	13	4.31054	7.43774	7.33511	7.08999	0.786997	-0.0200457	0.766952	-0.0490357	0.717916
	sp|Q05682-5|CALD1_HUMAN	CALD1	Isoform 5 of Caldesmon OS=Homo sapiens OX=9606 GN=CALD1	3522	3	5.05154	8.69995	7.51216	6.0211	0.784283	-0.21178	0.572504	-0.319201	0.253303
	sp|P05026|AT1B1_HUMAN	ATP1B1	Sodium/potassium-transporting ATPase subunit beta-1 OS=Homo sapiens OX=9606 GN=ATP1B1 PE=1 SV=1	6892	2	5.10395	8.7867	5.14133	3.07906	0.783706	-0.773181	0.0105251	-0.739653	-0.729128
	sp|P04792|HSPB1_HUMAN	HSPB1	Heat shock protein beta-1 OS=Homo sapiens OX=9606 GN=HSPB1 PE=1 SV=2	2510	16	4.31995	7.42045	7.55889	6.59732	0.780491	0.0266677	0.807159	-0.196295	0.610863
	sp|Q86SQ0|PHLB2_HUMAN	PHLDB2	Pleckstrin homology-like domain family B member 2 OS=Homo sapiens OX=9606 GN=PHLDB2 PE=1 SV=2	4036	8	5.97691	10.2506	6.51647	6.10933	0.778239	-0.653548	0.12469	-0.0930746	0.0316155
	sp|P41247|PLPL4_HUMAN	PNPLA4	Patatin-like phospholipase domain-containing protein 4 OS=Homo sapiens OX=9606 GN=PNPLA4 PE=2 SV=3	5947	4	6.05291	10.3395	6.68262	5.36361	0.77246	-0.629675	0.142785	-0.31721	-0.174425
	sp|P42224|STAT1_HUMAN	STAT1	Signal transducer and activator of transcription 1-alpha/beta OS=Homo sapiens OX=9606 GN=STAT1 PE=1 SV=2	4195	28	5.90029	10.0532	6.35511	5.69787	0.768797	-0.661666	0.107131	-0.157496	-0.0503652
	sp|P52895|AK1C2_HUMAN	AKR1C2	Aldo-keto reductase family 1 member C2 OS=Homo sapiens OX=9606 GN=AKR1C2 PE=1 SV=3	2506	7	3.04083	5.17178	5.24222	4.32334	0.766198	0.0195175	0.785715	-0.278034	0.507681
	sp|P61587|RND3_HUMAN	RND3	Rho-related GTP-binding protein RhoE OS=Homo sapiens OX=9606 GN=RND3 PE=1 SV=1	3885	3	5.07859	8.59905	5.32766	5.94658	0.759748	-0.690676	0.0690722	0.15856	0.227632
	tr|A0A0A0MSS8|A0A0A0MSS8_HUMAN	AKR1C3	Aldo-keto reductase family 1 member C3 OS=Homo sapiens OX=9606 GN=AKR1C3 PE=1 SV=1	2506	11	4.34406	7.35155	7.71936	4.53143	0.759004	0.0704318	0.829436	-0.768513	0.0609227
	sp|P02008|HBAZ_HUMAN	HBZ	Hemoglobin subunit zeta OS=Homo sapiens OX=9606 GN=HBZ PE=1 SV=2	5380	2	0.0414852	0.0701807	0.055984	0.0664596	0.758477	-0.326058	0.432419	0.247462	0.679881
	tr|A0A2R8YFA9|A0A2R8YFA9_HUMAN	MICAL2	[F-actin]-monooxygenase MICAL2 OS=Homo sapiens OX=9606 GN=MICAL2 PE=1 SV=1	3416	2	6.57896	10.984	6.16365	5.16462	0.73947	-0.833546	-0.0940753	-0.255123	-0.349198
	sp|O15523|DDX3Y_HUMAN	DDX3Y	ATP-dependent RNA helicase DDX3Y OS=Homo sapiens OX=9606 GN=DDX3Y PE=1 SV=2	2383	4	5.67246	9.44771	4.78631	6.43952	0.735991	-0.981052	-0.245061	0.42804	0.182979
	sp|P61812-2|TGFB2_HUMAN	TGFB2	Isoform B of Transforming growth factor beta-2 proprotein OS=Homo sapiens OX=9606 GN=TGFB2	1813	3	6.14042	10.2157	6.26403	6.67374	0.734378	-0.705624	0.0287534	0.0914055	0.120159
	sp|Q8WUY3-3|PRUN2_HUMAN	PRUNE2	Isoform 3 of Protein prune homolog 2 OS=Homo sapiens OX=9606 GN=PRUNE2	3045	22	4.24121	7.04538	8.81354	4.58439	0.732202	0.323043	1.05525	-0.942992	0.112254
	sp|P54793|ARSF_HUMAN	ARSF	Arylsulfatase F OS=Homo sapiens OX=9606 GN=ARSF PE=1 SV=4	4161	2	8.06132	13.3833	5.15118	2.37953	0.731342	-1.37745	-0.646112	-1.11423	-1.76034
	sp|O15230|LAMA5_HUMAN	LAMA5	Laminin subunit alpha-5 OS=Homo sapiens OX=9606 GN=LAMA5 PE=1 SV=8	1562	4	5.17846	8.57227	7.75838	6.09881	0.727153	-0.143921	0.583232	-0.347228	0.236004
	sp|P12814|ACTN1_HUMAN	ACTN1	Alpha-actinin-1 OS=Homo sapiens OX=9606 GN=ACTN1 PE=1 SV=2	994	3	5.76398	9.53351	6.78783	6.69027	0.725942	-0.490059	0.235883	-0.0208849	0.214998
	sp|Q9Y2J4-4|AMOL2_HUMAN	AMOTL2	Isoform 4 of Angiomotin-like protein 2 OS=Homo sapiens OX=9606 GN=AMOTL2	6318	3	5.82421	9.63216	6.81421	6.37283	0.725796	-0.499312	0.226484	-0.0966126	0.129872
	sp|Q15417|CNN3_HUMAN	CNN3	Calponin-3 OS=Homo sapiens OX=9606 GN=CNN3 PE=1 SV=1	1454	12	5.19561	8.58232	6.92623	7.50732	0.724075	-0.309296	0.414779	0.116227	0.531006
	sp|Q15942|ZYX_HUMAN	ZYX	Zyxin OS=Homo sapiens OX=9606 GN=ZYX PE=1 SV=1	3080	15	4.8139	7.93923	5.55699	6.79855	0.721793	-0.514697	0.207096	0.290924	0.49802
	sp|O00469-2|PLOD2_HUMAN	PLOD2	Isoform 2 of Procollagen-lysine,2-oxoglutarate 5-dioxygenase 2 OS=Homo sapiens OX=9606 GN=PLOD2	574	16	5.74747	9.44962	5.50001	9.5451	0.717329	-0.780823	-0.0634941	0.795327	0.731833
	sp|P06737|PYGL_HUMAN	PYGL	Glycogen phosphorylase, liver form OS=Homo sapiens OX=9606 GN=PYGL PE=1 SV=4	389	28	5.20683	8.5554	7.55356	6.01273	0.71643	-0.179679	0.536751	-0.329137	0.207615
	sp|P43235|CATK_HUMAN	CTSK	Cathepsin K OS=Homo sapiens OX=9606 GN=CTSK PE=1 SV=1	2340	8	5.1579	8.46725	6.68534	5.19212	0.71511	-0.340893	0.374216	-0.364676	0.00953992
	sp|P13196|HEM1_HUMAN	ALAS1	5-aminolevulinate synthase, nonspecific, mitochondrial OS=Homo sapiens OX=9606 GN=ALAS1 PE=1 SV=2	1534	5	5.95288	9.76553	6.63738	6.08044	0.714111	-0.557084	0.157027	-0.126437	0.0305899
	sp|P05091|ALDH2_HUMAN	ALDH2	Aldehyde dehydrogenase, mitochondrial OS=Homo sapiens OX=9606 GN=ALDH2 PE=1 SV=2	194	22	4.74417	7.77111	6.86424	5.15691	0.711967	-0.179022	0.532945	-0.412591	0.120354
	sp|O14786|NRP1_HUMAN	NRP1	Neuropilin-1 OS=Homo sapiens OX=9606 GN=NRP1 PE=1 SV=3	4739	2	5.75189	9.41967	7.22632	5.5637	0.711642	-0.382415	0.329227	-0.377216	-0.0479893
	sp|Q9Y5Q0|FADS3_HUMAN	FADS3	Fatty acid desaturase 3 OS=Homo sapiens OX=9606 GN=FADS3 PE=1 SV=1	1180	2	5.72711	9.3645	5.62404	4.34041	0.709395	-0.735596	-0.0262	-0.373777	-0.399977
	sp|Q13976-2|KGP1_HUMAN	PRKG1	Isoform Beta of cGMP-dependent protein kinase 1 OS=Homo sapiens OX=9606 GN=PRKG1	4014	7	5.17793	8.43944	6.21615	6.92765	0.704772	-0.441126	0.263646	0.156345	0.419992
	sp|Q9Y6K8|KAD5_HUMAN	AK5	Adenylate kinase isoenzyme 5 OS=Homo sapiens OX=9606 GN=AK5 PE=1 SV=2	2632	5	2.24197	3.65328	3.98447	4.60543	0.704426	0.125195	0.829621	0.208948	1.03857
	sp|Q969Z3|MARC2_HUMAN	MARC2	Mitochondrial amidoxime reducing component 2 OS=Homo sapiens OX=9606 GN=MARC2 PE=1 SV=1	5967	3	5.62469	9.12998	7.96557	3.97132	0.698837	-0.196834	0.502002	-1.00416	-0.502154
	sp|P33527-9|MRP1_HUMAN	ABCC1	Isoform 9 of Multidrug resistance-associated protein 1 OS=Homo sapiens OX=9606 GN=ABCC1	2151	14	4.39596	7.10425	7.95562	6.85258	0.692504	0.163292	0.855796	-0.215328	0.640468
	sp|Q9P266|JCAD_HUMAN	JCAD	Junctional protein associated with coronary artery disease OS=Homo sapiens OX=9606 GN=JCAD PE=1 SV=3	1311	9	5.05394	8.1506	7.66518	7.19766	0.689499	-0.088586	0.600913	-0.0907933	0.510119
	tr|J3KNE7|J3KNE7_HUMAN	TPD52L1	Tumor protein D53 OS=Homo sapiens OX=9606 GN=TPD52L1 PE=1 SV=1	6281	3	5.32087	8.57222	7.86913	4.90672	0.688008	-0.123465	0.564543	-0.681445	-0.116902
	sp|O60936-3|NOL3_HUMAN	NOL3	Isoform 3 of Nucleolar protein 3 OS=Homo sapiens OX=9606 GN=NOL3	6334	2	5.16469	8.30784	8.27296	4.97234	0.685792	-0.00606983	0.679722	-0.73448	-0.0547583
	sp|Q14766-4|LTBP1_HUMAN	LTBP1	Isoform 4 of Latent-transforming growth factor beta-binding protein 1 OS=Homo sapiens OX=9606 GN=LTBP1	2047	13	4.82397	7.75212	7.84873	5.89482	0.684372	0.0178671	0.702239	-0.41301	0.289229
	sp|P19971|TYPH_HUMAN	TYMP	Thymidine phosphorylase OS=Homo sapiens OX=9606 GN=TYMP PE=1 SV=2	1810	8	6.13977	9.85191	6.894	5.09328	0.682219	-0.515062	0.167157	-0.436748	-0.26959
	sp|Q70JA7|CHSS3_HUMAN	CHSY3	Chondroitin sulfate synthase 3 OS=Homo sapiens OX=9606 GN=CHSY3 PE=2 SV=3	4398	5	4.17772	6.69555	7.09741	5.76433	0.680486	0.0840887	0.764575	-0.30014	0.464435
	sp|Q8WX93|PALLD_HUMAN	PALLD	Palladin OS=Homo sapiens OX=9606 GN=PALLD PE=1 SV=3	195	13	5.74786	9.19609	5.94941	7.62734	0.677994	-0.628274	0.04972	0.358433	0.408153
	sp|Q92597|NDRG1_HUMAN	NDRG1	Protein NDRG1 OS=Homo sapiens OX=9606 GN=NDRG1 PE=1 SV=1	3976	6	5.44454	8.68923	6.01477	6.63165	0.674418	-0.530721	0.143697	0.140859	0.284557
	sp|O43150|ASAP2_HUMAN	ASAP2	Arf-GAP with SH3 domain, ANK repeat and PH domain-containing protein 2 OS=Homo sapiens OX=9606 GN=ASAP2 PE=1 SV=3	1648	5	3.34157	5.31431	4.20023	4.5824	0.669355	-0.339413	0.329942	0.125635	0.455577
	tr|A0A0A0MQT0|A0A0A0MQT0_HUMAN	RBP1	Retinol binding protein 1, cellular OS=Homo sapiens OX=9606 GN=RBP1 PE=1 SV=1	3336	5	5.57861	8.86817	7.10643	7.01055	0.668732	-0.319512	0.34922	-0.019597	0.329623
	sp|O43166|SI1L1_HUMAN	SIPA1L1	Signal-induced proliferation-associated 1-like protein 1 OS=Homo sapiens OX=9606 GN=SIPA1L1 PE=1 SV=4	4977	4	5.53728	8.79163	6.76843	8.20136	0.666955	-0.37731	0.289645	0.277042	0.566687
	sp|Q5JRX3-2|PREP_HUMAN	PITRM1	Isoform 2 of Presequence protease, mitochondrial OS=Homo sapiens OX=9606 GN=PITRM1	1936	21	4.47933	7.11112	7.32105	6.15217	0.666795	0.0419728	0.708767	-0.250955	0.457812
	tr|A0A2R8Y793|A0A2R8Y793_HUMAN	ACTB	Actin, cytoplasmic 1 (Fragment) OS=Homo sapiens OX=9606 GN=ACTB PE=1 SV=1	1360	5	3.04072	4.82041	3.68951	3.84822	0.66474	-0.385726	0.279015	0.0607621	0.339777
	sp|Q8IZJ1|UNC5B_HUMAN	UNC5B	Netrin receptor UNC5B OS=Homo sapiens OX=9606 GN=UNC5B PE=1 SV=2	603	5	6.04336	9.57511	6.644	6.64028	0.663937	-0.527237	0.136701	-0.000809445	0.135891
	sp|Q9BSY4-2|CHCH5_HUMAN	CHCHD5	Isoform 2 of Coiled-coil-helix-coiled-coil-helix domain-containing protein 5 OS=Homo sapiens OX=9606 GN=CHCHD5	5371	2	5.62918	8.89454	6.80368	5.43102	0.659994	-0.386605	0.273389	-0.325092	-0.0517025
	sp|P30038|AL4A1_HUMAN	ALDH4A1	Delta-1-pyrroline-5-carboxylate dehydrogenase, mitochondrial OS=Homo sapiens OX=9606 GN=ALDH4A1 PE=1 SV=3	116	16	4.53603	7.14897	6.51757	5.18373	0.656306	-0.1334	0.522905	-0.330344	0.192561
	sp|P35610|SOAT1_HUMAN	SOAT1	Sterol O-acyltransferase 1 OS=Homo sapiens OX=9606 GN=SOAT1 PE=1 SV=3	2405	5	5.3081	8.33838	6.95341	5.01888	0.651571	-0.262046	0.389525	-0.470356	-0.080831
	sp|Q08431|MFGM_HUMAN	MFGE8	Lactadherin OS=Homo sapiens OX=9606 GN=MFGE8 PE=1 SV=3	1434	16	5.45155	8.56352	6.89344	6.31117	0.651538	-0.312979	0.338559	-0.127317	0.211242
	sp|Q04721|NOTC2_HUMAN	NOTCH2	Neurogenic locus notch homolog protein 2 OS=Homo sapiens OX=9606 GN=NOTCH2 PE=1 SV=3	3191	11	4.69434	7.36205	7.65072	5.96824	0.649187	0.0554876	0.704675	-0.35829	0.346384
	sp|O43294|TGFI1_HUMAN	TGFB1I1	Transforming growth factor beta-1-induced transcript 1 protein OS=Homo sapiens OX=9606 GN=TGFB1I1 PE=1 SV=2	2587	3	6.22362	9.7409	6.75408	5.79098	0.6463	-0.528295	0.118005	-0.221952	-0.103947
	sp|O00151|PDLI1_HUMAN	PDLIM1	PDZ and LIM domain protein 1 OS=Homo sapiens OX=9606 GN=PDLIM1 PE=1 SV=4	3232	10	5.33166	8.3235	6.29928	4.65374	0.642605	-0.402003	0.240602	-0.436796	-0.196194
	sp|O75600-2|KBL_HUMAN	GCAT	Isoform 2 of 2-amino-3-ketobutyrate coenzyme A ligase, mitochondrial OS=Homo sapiens OX=9606 GN=GCAT	1823	3	3.71169	5.78777	7.42142	6.72096	0.640933	0.358687	0.99962	-0.143029	0.856591
	tr|A0A3B3IS55|A0A3B3IS55_HUMAN	ABLIM1	Actin-binding LIM protein 1 OS=Homo sapiens OX=9606 GN=ABLIM1 PE=1 SV=1	1732	2	3.86101	6.0189	3.83341	7.26803	0.64052	-0.650872	-0.0103512	0.922937	0.912586
	sp|P26022|PTX3_HUMAN	PTX3	Pentraxin-related protein PTX3 OS=Homo sapiens OX=9606 GN=PTX3 PE=1 SV=3	1765	3	6.82592	10.6364	5.61596	6.95871	0.63991	-0.9214	-0.28149	0.309287	0.0277971
	sp|Q92667|AKAP1_HUMAN	AKAP1	A-kinase anchor protein 1, mitochondrial OS=Homo sapiens OX=9606 GN=AKAP1 PE=1 SV=1	2033	5	5.36863	8.36395	7.24204	5.87013	0.639631	-0.207789	0.431842	-0.303001	0.128841
	tr|B4DPQ0|B4DPQ0_HUMAN	C1R	Complement C1r subcomponent OS=Homo sapiens OX=9606 GN=C1R PE=1 SV=1	3313	17	5.93194	9.21163	6.73601	5.00448	0.634952	-0.451562	0.183391	-0.428674	-0.245284
	sp|Q9BTZ2|DHRS4_HUMAN	DHRS4	Dehydrogenase/reductase SDR family member 4 OS=Homo sapiens OX=9606 GN=DHRS4 PE=1 SV=3	2324	7	3.91419	6.07677	5.83935	4.98521	0.63459	-0.0574989	0.577092	-0.228154	0.348938
	sp|Q14573|ITPR3_HUMAN	ITPR3	Inositol 1,4,5-trisphosphate receptor type 3 OS=Homo sapiens OX=9606 GN=ITPR3 PE=1 SV=2	232	8	6.5493	10.1523	6.17209	6.43129	0.632397	-0.717979	-0.085582	0.0593487	-0.0262333
	sp|P00491|PNPH_HUMAN	PNP	Purine nucleoside phosphorylase OS=Homo sapiens OX=9606 GN=PNP PE=1 SV=2	642	13	3.44183	5.33036	4.55913	3.86497	0.631055	-0.225473	0.405582	-0.238302	0.16728
	sp|Q12955|ANK3_HUMAN	ANK3	Ankyrin-3 OS=Homo sapiens OX=9606 GN=ANK3 PE=1 SV=3	1465	5	5.9287	9.17447	6.95071	6.42526	0.629908	-0.400463	0.229445	-0.113405	0.116039
	sp|P06753|TPM3_HUMAN	TPM3	Tropomyosin alpha-3 chain OS=Homo sapiens OX=9606 GN=TPM3 PE=1 SV=2	837	11	5.13441	7.91784	6.57531	5.89219	0.624908	-0.268048	0.35686	-0.158255	0.198605
	sp|Q96Q06-2|PLIN4_HUMAN	PLIN4	Isoform 2 of Perilipin-4 OS=Homo sapiens OX=9606 GN=PLIN4	2947	7	1.98733	3.06232	10.5913	6.51403	0.623797	1.79018	2.41398	-0.701258	1.71272
	sp|P48059-3|LIMS1_HUMAN	LIMS1	Isoform 3 of LIM and senescent cell antigen-like-containing domain protein 1 OS=Homo sapiens OX=9606 GN=LIMS1	322	13	5.38858	8.29072	6.57552	7.02677	0.621593	-0.334394	0.287199	0.0957584	0.382958
	sp|Q9H496|IFG15_HUMAN	TOR1AIP2	Torsin-1A-interacting protein 2, isoform IFRG15 OS=Homo sapiens OX=9606 GN=TOR1AIP2 PE=1 SV=1	604	2	5.44485	8.37699	5.42773	5.96336	0.621539	-0.626082	-0.00454246	0.135776	0.131233
	sp|Q96I59|SYNM_HUMAN	NARS2	Probable asparagine--tRNA ligase, mitochondrial OS=Homo sapiens OX=9606 GN=NARS2 PE=1 SV=3	3352	5	5.3899	8.26246	6.0798	4.73812	0.616313	-0.442548	0.173764	-0.359709	-0.185945
	sp|P04156|PRIO_HUMAN	PRNP	Major prion protein OS=Homo sapiens OX=9606 GN=PRNP PE=1 SV=1	5099	5	5.84798	8.96267	6.00683	9.76357	0.615989	-0.577326	0.0386638	0.700806	0.73947
	sp|P09488|GSTM1_HUMAN	GSTM1	Glutathione S-transferase Mu 1 OS=Homo sapiens OX=9606 GN=GSTM1 PE=1 SV=3	3287	3	4.4032	6.73912	8.98774	4.70104	0.614008	0.415398	1.02941	-0.934978	0.0944287
	sp|P05120|PAI2_HUMAN	SERPINB2	Plasminogen activator inhibitor 2 OS=Homo sapiens OX=9606 GN=SERPINB2 PE=1 SV=2	2269	11	8.10272	12.3689	4.8034	2.61749	0.610239	-1.36459	-0.75435	-0.87587	-1.63022
	sp|P12814-4|ACTN1_HUMAN	ACTN1	Isoform 4 of Alpha-actinin-1 OS=Homo sapiens OX=9606 GN=ACTN1	994	35	5.14634	7.82819	6.25003	5.69648	0.605132	-0.324817	0.280315	-0.133792	0.146523
	sp|P08582|TRFM_HUMAN	MELTF	Melanotransferrin OS=Homo sapiens OX=9606 GN=MELTF PE=1 SV=2	800	10	3.83348	5.82536	5.38549	6.82102	0.603691	-0.11327	0.490421	0.340909	0.831331
	sp|Q8N556-2|AFAP1_HUMAN	AFAP1	Isoform 2 of Actin filament-associated protein 1 OS=Homo sapiens OX=9606 GN=AFAP1	1777	5	5.69488	8.64396	7.00428	7.47888	0.602028	-0.303457	0.298571	0.0945852	0.393157
	tr|G3V4T6|G3V4T6_HUMAN	GSTZ1	Maleylacetoacetate isomerase OS=Homo sapiens OX=9606 GN=GSTZ1 PE=1 SV=1	3794	2	5.13588	7.78644	5.40575	8.67254	0.600354	-0.526469	0.0738847	0.681959	0.755844
	sp|Q9Y490|TLN1_HUMAN	TLN1	Talin-1 OS=Homo sapiens OX=9606 GN=TLN1 PE=1 SV=3	224	27	5.64074	8.54976	6.28645	5.93633	0.599999	-0.443639	0.156361	-0.0826751	0.0736856
	sp|Q08380|LG3BP_HUMAN	LGALS3BP	Galectin-3-binding protein OS=Homo sapiens OX=9606 GN=LGALS3BP PE=1 SV=1	184	5	8.0359	12.1763	5.43869	3.36566	0.599541	-1.16274	-0.5632	-0.692368	-1.25557
	sp|P36897-2|TGFR1_HUMAN	TGFBR1	Isoform 2 of TGF-beta receptor type-1 OS=Homo sapiens OX=9606 GN=TGFBR1	4010	3	6.09555	9.21914	6.80794	6.60415	0.596875	-0.437414	0.159461	-0.0438447	0.115616
	sp|P98155|VLDLR_HUMAN	VLDLR	Very low-density lipoprotein receptor OS=Homo sapiens OX=9606 GN=VLDLR PE=1 SV=1	1729	8	5.14905	7.78657	8.21749	5.94412	0.596683	0.0777101	0.674393	-0.467236	0.207157
	sp|Q86WA8|LONP2_HUMAN	LONP2	Lon protease homolog 2, peroxisomal OS=Homo sapiens OX=9606 GN=LONP2 PE=1 SV=1	3975	10	6.12856	9.26402	6.75404	5.72508	0.59609	-0.455887	0.140203	-0.238454	-0.098251
	sp|O14841|OPLA_HUMAN	OPLAH	5-oxoprolinase OS=Homo sapiens OX=9606 GN=OPLAH PE=1 SV=3	1326	14	5.41662	8.18523	7.74794	4.68127	0.59563	-0.0792101	0.51642	-0.726913	-0.210494
	sp|P50552|VASP_HUMAN	VASP	Vasodilator-stimulated phosphoprotein OS=Homo sapiens OX=9606 GN=VASP PE=1 SV=3	2802	10	6.12223	9.25006	6.83236	6.04632	0.595407	-0.43708	0.158326	-0.176324	-0.0179979
	sp|Q13303-5|KCAB2_HUMAN	KCNAB2	Isoform 5 of Voltage-gated potassium channel subunit beta-2 OS=Homo sapiens OX=9606 GN=KCNAB2	1110	2	5.72855	8.65496	7.05592	7.25698	0.595358	-0.294692	0.300666	0.0405334	0.341199
	sp|P30825|CTR1_HUMAN	SLC7A1	High affinity cationic amino acid transporter 1 OS=Homo sapiens OX=9606 GN=SLC7A1 PE=1 SV=1	3060	2	6.34697	9.58501	5.7147	8.95791	0.594713	-0.746103	-0.15139	0.648485	0.497095
	sp|P48960|CD97_HUMAN	CD97	CD97 antigen OS=Homo sapiens OX=9606 GN=CD97 PE=1 SV=4	3343	5	5.94649	8.93015	6.42355	8.41437	0.586645	-0.475313	0.111332	0.389484	0.500816
	sp|P26374|RAE2_HUMAN	CHML	Rab proteins geranylgeranyltransferase component A 2 OS=Homo sapiens OX=9606 GN=CHML PE=1 SV=2	1646	2	6.44553	9.67947	6.66548	5.81607	0.586629	-0.538219	0.0484094	-0.196666	-0.148256
	sp|P40123|CAP2_HUMAN	CAP2	Adenylyl cyclase-associated protein 2 OS=Homo sapiens OX=9606 GN=CAP2 PE=1 SV=1	1204	11	5.81121	8.72415	7.21035	4.66465	0.586177	-0.274945	0.311232	-0.6283	-0.317067
	sp|Q76M96-2|CCD80_HUMAN	CCDC80	Isoform 2 of Coiled-coil domain-containing protein 80 OS=Homo sapiens OX=9606 GN=CCDC80	2809	5	5.29544	7.94502	7.06397	7.60094	0.585299	-0.169572	0.415728	0.105699	0.521426
	sp|P09601|HMOX1_HUMAN	HMOX1	Heme oxygenase 1 OS=Homo sapiens OX=9606 GN=HMOX1 PE=1 SV=1	307	7	5.23113	7.84562	6.6281	5.29935	0.584765	-0.243292	0.341472	-0.32278	0.0186919
	sp|O94808|GFPT2_HUMAN	GFPT2	Glutamine--fructose-6-phosphate aminotransferase [isomerizing] 2 OS=Homo sapiens OX=9606 GN=GFPT2 PE=1 SV=3	2884	8	4.09401	6.13618	6.6659	5.87591	0.583826	0.11946	0.703286	-0.181988	0.521298
	sp|Q9Y4D7|PLXD1_HUMAN	PLXND1	Plexin-D1 OS=Homo sapiens OX=9606 GN=PLXND1 PE=1 SV=3	889	2	5.33501	7.9864	7.57697	7.28697	0.582056	-0.0759243	0.506132	-0.0563036	0.449828
	sp|Q9BZQ8|NIBA1_HUMAN	NIBAN1	Protein Niban 1 OS=Homo sapiens OX=9606 GN=NIBAN1 PE=1 SV=1	1798	17	5.16632	7.72481	6.47957	8.2792	0.580363	-0.2536	0.326762	0.353592	0.680354
	sp|Q15404|RSU1_HUMAN	RSU1	Ras suppressor protein 1 OS=Homo sapiens OX=9606 GN=RSU1 PE=1 SV=3	4111	4	4.74761	7.09816	6.08524	6.54083	0.580243	-0.222132	0.358111	0.10416	0.462271
	sp|Q13563|PKD2_HUMAN	PKD2	Polycystin-2 OS=Homo sapiens OX=9606 GN=PKD2 PE=1 SV=3	5468	2	5.97311	8.90193	5.93503	6.74374	0.575635	-0.584862	-0.00922656	0.184293	0.175067
	sp|O94925-3|GLSK_HUMAN	GLS	Isoform 3 of Glutaminase kidney isoform, mitochondrial OS=Homo sapiens OX=9606 GN=GLS	3481	3	4.09718	6.1045	4.51258	5.23539	0.575243	-0.435922	0.139321	0.214346	0.353667
	sp|P00325|ADH1B_HUMAN	ADH1B	All-trans-retinol dehydrogenase [NAD(+)] ADH1B OS=Homo sapiens OX=9606 GN=ADH1B PE=1 SV=2	529	15	4.9508	7.37456	6.1657	8.64541	0.574897	-0.258292	0.316605	0.487668	0.804273
	sp|Q16798|MAON_HUMAN	ME3	NADP-dependent malic enzyme, mitochondrial OS=Homo sapiens OX=9606 GN=ME3 PE=2 SV=2	2133	7	4.73129	7.04717	6.65435	7.92104	0.574811	-0.0827466	0.492065	0.251392	0.743457
	sp|P84157-3|MXRA7_HUMAN	MXRA7	Isoform 3 of Matrix-remodeling-associated protein 7 OS=Homo sapiens OX=9606 GN=MXRA7	5751	2	5.05789	7.5248	6.61829	5.96936	0.573118	-0.185193	0.387925	-0.148882	0.239043
	sp|Q8NBP7|PCSK9_HUMAN	PCSK9	Proprotein convertase subtilisin/kexin type 9 OS=Homo sapiens OX=9606 GN=PCSK9 PE=1 SV=3	4339	2	5.32288	7.90161	7.39904	7.96621	0.569941	-0.0948101	0.475131	0.106556	0.581687
	sp|P43007|SATT_HUMAN	SLC1A4	Neutral amino acid transporter A OS=Homo sapiens OX=9606 GN=SLC1A4 PE=1 SV=1	3294	3	6.15209	9.12352	6.2503	8.33569	0.568514	-0.545667	0.0228477	0.415377	0.438225
	sp|O60232|ZNRD2_HUMAN	ZNRD2	Protein ZNRD2 OS=Homo sapiens OX=9606 GN=ZNRD2 PE=1 SV=1	4119	4	4.60011	6.81838	6.93722	5.31496	0.567761	0.0249304	0.592691	-0.3843	0.208392
	sp|P49662|CASP4_HUMAN	CASP4	Caspase-4 OS=Homo sapiens OX=9606 GN=CASP4 PE=1 SV=1	905	5	5.14394	7.61322	5.856	6.25952	0.565634	-0.378593	0.187041	0.0961366	0.283177
	sp|Q92781|RDH5_HUMAN	RDH5	Retinol dehydrogenase 5 OS=Homo sapiens OX=9606 GN=RDH5 PE=1 SV=1	5315	3	5.55022	8.21066	7.48726	6.8969	0.564953	-0.133062	0.431891	-0.118489	0.313402
	sp|P11166|GTR1_HUMAN	SLC2A1	Solute carrier family 2, facilitated glucose transporter member 1 OS=Homo sapiens OX=9606 GN=SLC2A1 PE=1 SV=2	5798	6	7.38845	10.9136	3.94267	4.78584	0.562788	-1.46889	-0.906099	0.2796	-0.626499
	sp|O60443|GSDME_HUMAN	GSDME	Gasdermin-E OS=Homo sapiens OX=9606 GN=GSDME PE=1 SV=2	2096	9	5.68094	8.38922	6.71032	6.38404	0.562406	-0.322155	0.240251	-0.0719122	0.168339
	sp|O94804|STK10_HUMAN	STK10	Serine/threonine-protein kinase 10 OS=Homo sapiens OX=9606 GN=STK10 PE=1 SV=1	1108	7	6.70839	9.89423	6.28478	6.24173	0.560621	-0.654724	-0.0941032	-0.00991744	-0.104021
	tr|A0A0A0MTH3|A0A0A0MTH3_HUMAN	ILK	Integrin-linked protein kinase OS=Homo sapiens OX=9606 GN=ILK PE=1 SV=1	5258	12	5.57591	8.21254	6.23402	7.13694	0.558621	-0.397664	0.160957	0.195142	0.356099
	sp|P13995|MTDC_HUMAN	MTHFD2	Bifunctional methylenetetrahydrofolate dehydrogenase/cyclohydrolase, mitochondrial OS=Homo sapiens OX=9606 GN=MTHFD2 PE=1 SV=2	1509	6	5.2366	7.71108	4.16094	5.46751	0.558303	-0.890022	-0.331719	0.393973	0.0622545
	sp|P00973-3|OAS1_HUMAN	OAS1	Isoform p48 of 2'-5'-oligoadenylate synthase 1 OS=Homo sapiens OX=9606 GN=OAS1	4713	2	6.24108	9.17525	8.1988	2.20942	0.555951	-0.162335	0.393616	-1.89174	-1.49813
	sp|Q6UWU2|GLB1L_HUMAN	GLB1L	Beta-galactosidase-1-like protein OS=Homo sapiens OX=9606 GN=GLB1L PE=2 SV=1	1316	3	6.08377	8.94274	7.40369	5.24916	0.55575	-0.272471	0.283279	-0.496157	-0.212878
	sp|Q7L8L6|FAKD5_HUMAN	FASTKD5	FAST kinase domain-containing protein 5, mitochondrial OS=Homo sapiens OX=9606 GN=FASTKD5 PE=1 SV=1	536	5	6.05482	8.89068	6.65958	6.09479	0.554208	-0.416863	0.137346	-0.127854	0.00949165
	sp|Q9UJS0-2|CMC2_HUMAN	SLC25A13	Isoform 2 of Calcium-binding mitochondrial carrier protein Aralar2 OS=Homo sapiens OX=9606 GN=SLC25A13	1464	10	5.13554	7.5371	5.39845	5.03179	0.553493	-0.481464	0.0720293	-0.101474	-0.0294443
	sp|P04181|OAT_HUMAN	OAT	Ornithine aminotransferase, mitochondrial OS=Homo sapiens OX=9606 GN=OAT PE=1 SV=1	1288	6	5.13616	7.53617	5.69801	5.69693	0.553141	-0.403372	0.149768	-0.000273896	0.149495
	sp|P52943-2|CRIP2_HUMAN	CRIP2	Isoform 2 of Cysteine-rich protein 2 OS=Homo sapiens OX=9606 GN=CRIP2	2697	3	4.28607	6.28594	5.6169	5.18395	0.552472	-0.162353	0.390119	-0.115723	0.274396
	sp|P12110|CO6A2_HUMAN	COL6A2	Collagen alpha-2(VI) chain OS=Homo sapiens OX=9606 GN=COL6A2 PE=1 SV=4	518	22	5.94393	8.71592	6.72612	5.68351	0.552237	-0.37388	0.178357	-0.24299	-0.0646329
	sp|Q7Z494|NPHP3_HUMAN	NPHP3	Nephrocystin-3 OS=Homo sapiens OX=9606 GN=NPHP3 PE=1 SV=1	5911	3	5.16485	7.56173	5.75276	4.30658	0.54999	-0.394461	0.155529	-0.417713	-0.262185
	tr|A0A494C1B9|A0A494C1B9_HUMAN	GUCY1B1	Guanylate cyclase soluble subunit beta-1 OS=Homo sapiens OX=9606 GN=GUCY1B1 PE=1 SV=1	1223	4	2.57653	3.77152	2.87423	3.33005	0.549717	-0.391969	0.157748	0.212366	0.370114
	sp|Q15118-2|PDK1_HUMAN	PDK1	Isoform 2 of [Pyruvate dehydrogenase (acetyl-transferring)] kinase isozyme 1, mitochondrial OS=Homo sapiens OX=9606 GN=PDK1	390	4	5.08626	7.44198	8.04709	6.06334	0.54908	0.112781	0.661861	-0.408354	0.253508
	tr|A0A494BZV2|A0A494BZV2_HUMAN	MPRIP	Myosin phosphatase Rho-interacting protein OS=Homo sapiens OX=9606 GN=MPRIP PE=1 SV=1	663	19	5.98315	8.71492	6.73123	5.72175	0.542581	-0.372617	0.169964	-0.234413	-0.0644496
	tr|A0A0A0MS69|A0A0A0MS69_HUMAN	PDE1C	Phosphodiesterase OS=Homo sapiens OX=9606 GN=PDE1C PE=1 SV=1	4383	4	5.62531	8.19285	7.54341	6.64253	0.542433	-0.119149	0.423284	-0.183484	0.2398
	sp|P00167|CYB5_HUMAN	CYB5A	Cytochrome b5 OS=Homo sapiens OX=9606 GN=CYB5A PE=1 SV=2	5023	3	5.71314	8.2893	7.95498	5.13143	0.536966	-0.059392	0.477574	-0.632495	-0.154922
	sp|Q9UDY4|DNJB4_HUMAN	DNAJB4	DnaJ homolog subfamily B member 4 OS=Homo sapiens OX=9606 GN=DNAJB4 PE=1 SV=1	1640	4	5.4736	7.92639	5.95657	6.85281	0.534174	-0.412184	0.12199	0.202214	0.324204
	tr|A0A0G2JHC2|A0A0G2JHC2_HUMAN	PPP1R18	PPP1R18 OS=Homo sapiens OX=9606 GN=PPP1R18 PE=1 SV=1	2080	9	5.30382	7.67536	5.64888	6.52862	0.533203	-0.442269	0.0909344	0.208813	0.299747
	sp|Q27J81|INF2_HUMAN	INF2	Inverted formin-2 OS=Homo sapiens OX=9606 GN=INF2 PE=1 SV=2	1814	10	5.9605	8.6192	6.76548	6.40916	0.532119	-0.349361	0.182758	-0.0780562	0.104702
	sp|Q15043|S39AE_HUMAN	SLC39A14	Zinc transporter ZIP14 OS=Homo sapiens OX=9606 GN=SLC39A14 PE=1 SV=3	1988	3	6.49469	9.39147	6.72652	5.9912	0.53209	-0.481492	0.0505985	-0.167014	-0.116415
	sp|Q9H4G0|E41L1_HUMAN	EPB41L1	Band 4.1-like protein 1 OS=Homo sapiens OX=9606 GN=EPB41L1 PE=1 SV=2	2355	5	4.41043	6.37561	5.7291	3.98768	0.531643	-0.154255	0.377388	-0.522756	-0.145368
	sp|Q49MG5|MAP9_HUMAN	MAP9	Microtubule-associated protein 9 OS=Homo sapiens OX=9606 GN=MAP9 PE=1 SV=3	5103	2	6.03191	8.70331	6.7423	4.22154	0.528951	-0.368323	0.160627	-0.675472	-0.514845
	sp|O43734|CIKS_HUMAN	TRAF3IP2	Adapter protein CIKS OS=Homo sapiens OX=9606 GN=TRAF3IP2 PE=1 SV=3	1406	2	5.88207	8.48407	7.31334	6.51077	0.528433	-0.214226	0.314207	-0.167702	0.146505
	sp|Q96G03|PGM2_HUMAN	PGM2	Phosphoglucomutase-2 OS=Homo sapiens OX=9606 GN=PGM2 PE=1 SV=4	354	12	5.99937	8.64663	6.25768	6.60112	0.527326	-0.46651	0.0608165	0.0770826	0.137899
	sp|Q07817|B2CL1_HUMAN	BCL2L1	Bcl-2-like protein 1 OS=Homo sapiens OX=9606 GN=BCL2L1 PE=1 SV=1	4929	3	5.67974	8.175	5.71285	6.14687	0.525394	-0.517008	0.00838618	0.105641	0.114027
	tr|E7EQR4|E7EQR4_HUMAN	EZR	Ezrin OS=Homo sapiens OX=9606 GN=EZR PE=1 SV=3	283	5	5.74081	8.25884	6.5605	6.0693	0.524685	-0.332133	0.192552	-0.112278	0.0802738
	sp|P08648|ITA5_HUMAN	ITGA5	Integrin alpha-5 OS=Homo sapiens OX=9606 GN=ITGA5 PE=1 SV=2	1314	11	5.77198	8.30367	6.83299	7.68452	0.524683	-0.281233	0.243449	0.169439	0.412888
	tr|J3KMZ9|J3KMZ9_HUMAN	LDLR	Low-density lipoprotein receptor (Fragment) OS=Homo sapiens OX=9606 GN=LDLR PE=1 SV=1	1729	12	5.87198	8.44507	5.94339	6.223	0.524261	-0.506822	0.0174394	0.066323	0.0837624
	sp|P80723|BASP1_HUMAN	BASP1	Brain acid soluble protein 1 OS=Homo sapiens OX=9606 GN=BASP1 PE=1 SV=2	124	11	5.44063	7.81281	7.39289	7.21839	0.522069	-0.0797028	0.442366	-0.0344617	0.407904
	sp|P0CG29|GST2_HUMAN	GSTT2	Glutathione S-transferase theta-2 OS=Homo sapiens OX=9606 GN=GSTT2 PE=1 SV=1	3032	2	3.97724	5.71101	11.3702	1.35705	0.521978	0.993436	1.51541	-3.06671	-1.55129
	sp|Q96PY5-3|FMNL2_HUMAN	FMNL2	Isoform 2 of Formin-like protein 2 OS=Homo sapiens OX=9606 GN=FMNL2	2305	3	5.11364	7.31382	6.11472	6.58557	0.516275	-0.258338	0.257938	0.107021	0.364959
	sp|P62736|ACTA_HUMAN	ACTA2	Actin, aortic smooth muscle OS=Homo sapiens OX=9606 GN=ACTA2 PE=1 SV=1	1360	46	3.14338	4.49071	3.80281	3.89878	0.514627	-0.239878	0.274749	0.0359575	0.310706
	sp|O14745|NHRF1_HUMAN	SLC9A3R1	Na(+)/H(+) exchange regulatory cofactor NHE-RF1 OS=Homo sapiens OX=9606 GN=SLC9A3R1 PE=1 SV=4	2472	5	4.87862	6.96592	6.4745	5.71575	0.51384	-0.105544	0.408296	-0.179828	0.228468
	sp|Q0VF96|CGNL1_HUMAN	CGNL1	Cingulin-like protein 1 OS=Homo sapiens OX=9606 GN=CGNL1 PE=1 SV=2	3984	4	5.27814	7.53573	7.2503	5.47241	0.513717	-0.0557076	0.45801	-0.405864	0.0521458
	tr|A0A1B0GTW6|A0A1B0GTW6_HUMAN	EPB41L1	Band 4.1-like protein 1 (Fragment) OS=Homo sapiens OX=9606 GN=EPB41L1 PE=1 SV=1	2355	4	4.5942	6.55378	5.85517	3.85518	0.512515	-0.162617	0.349898	-0.602915	-0.253016
	sp|Q7KZN9|COX15_HUMAN	COX15	Cytochrome c oxidase assembly protein COX15 homolog OS=Homo sapiens OX=9606 GN=COX15 PE=1 SV=1	4950	2	6.04182	8.61869	7.44955	5.66058	0.512485	-0.210315	0.30217	-0.396203	-0.0940333
	sp|Q12959-2|DLG1_HUMAN	DLG1	Isoform 2 of Disks large homolog 1 OS=Homo sapiens OX=9606 GN=DLG1	1887	12	5.76178	8.21483	6.25212	6.80409	0.511715	-0.393885	0.11783	0.122057	0.239887
	sp|P53985|MOT1_HUMAN	SLC16A1	Monocarboxylate transporter 1 OS=Homo sapiens OX=9606 GN=SLC16A1 PE=1 SV=3	166	2	5.04381	7.17805	5.65491	6.92489	0.509078	-0.344087	0.164991	0.292287	0.457278
	sp|P46821|MAP1B_HUMAN	MAP1B	Microtubule-associated protein 1B OS=Homo sapiens OX=9606 GN=MAP1B PE=1 SV=2	127	32	4.87013	6.91851	5.88632	7.98464	0.5065	-0.233094	0.273407	0.439861	0.713267
	sp|Q96EX1|SIM12_HUMAN	SMIM12	Small integral membrane protein 12 OS=Homo sapiens OX=9606 GN=SMIM12 PE=1 SV=3	4156	3	6.39517	9.07979	7.0469	5.64686	0.505676	-0.36567	0.140006	-0.319541	-0.179535
	sp|Q9Y679|AUP1_HUMAN	AUP1	Ancient ubiquitous protein 1 OS=Homo sapiens OX=9606 GN=AUP1 PE=1 SV=2	5423	3	5.70955	8.09894	6.87123	5.69472	0.504356	-0.237163	0.267193	-0.270945	-0.00375129
	sp|Q9NRZ5|PLCD_HUMAN	AGPAT4	1-acyl-sn-glycerol-3-phosphate acyltransferase delta OS=Homo sapiens OX=9606 GN=AGPAT4 PE=1 SV=1	3527	4	3.2786	4.64994	4.75057	3.75578	0.504135	0.030887	0.535022	-0.338988	0.196034
	sp|P55809|SCOT1_HUMAN	OXCT1	Succinyl-CoA:3-ketoacid coenzyme A transferase 1, mitochondrial OS=Homo sapiens OX=9606 GN=OXCT1 PE=1 SV=1	1372	15	5.11502	7.25028	7.50697	6.08316	0.503297	0.0501934	0.55349	-0.303408	0.250082
	sp|P49789|FHIT_HUMAN	FHIT	Bis(5'-adenosyl)-triphosphatase OS=Homo sapiens OX=9606 GN=FHIT PE=1 SV=3	4549	3	4.41458	6.25318	6.23826	7.00413	0.502313	-0.00344598	0.498867	0.167061	0.665928
	sp|Q14195-2|DPYL3_HUMAN	DPYSL3	Isoform LCRMP-4 of Dihydropyrimidinase-related protein 3 OS=Homo sapiens OX=9606 GN=DPYSL3	132	22	4.25845	6.02766	5.35716	8.23002	0.50127	-0.170128	0.331141	0.619427	0.950568
	sp|O60711-2|LPXN_HUMAN	LPXN	Isoform 2 of Leupaxin OS=Homo sapiens OX=9606 GN=LPXN	3277	2	6.47271	9.15826	5.94699	8.71256	0.500704	-0.622914	-0.12221	0.550938	0.428728
	sp|Q8N3F8|MILK1_HUMAN	MICALL1	MICAL-like protein 1 OS=Homo sapiens OX=9606 GN=MICALL1 PE=1 SV=2	3804	6	6.21346	8.77375	6.21981	7.76921	0.497797	-0.496323	0.00147442	0.320898	0.322373
	sp|Q12805|FBLN3_HUMAN	EFEMP1	EGF-containing fibulin-like extracellular matrix protein 1 OS=Homo sapiens OX=9606 GN=EFEMP1 PE=1 SV=2	789	7	5.74542	8.11183	6.21628	2.5756	0.497615	-0.383975	0.113641	-1.27114	-1.1575
	sp|Q9H2J4|PDCL3_HUMAN	PDCL3	Phosducin-like protein 3 OS=Homo sapiens OX=9606 GN=PDCL3 PE=1 SV=1	4416	4	5.66683	7.99599	6.14922	6.12581	0.496735	-0.378872	0.117863	-0.00550319	0.11236
	sp|Q08257|QOR_HUMAN	CRYZ	Quinone oxidoreductase OS=Homo sapiens OX=9606 GN=CRYZ PE=1 SV=1	1356	9	3.74631	5.28527	5.10568	6.8893	0.496508	-0.0498754	0.446632	0.432255	0.878887
	sp|Q99538|LGMN_HUMAN	LGMN	Legumain OS=Homo sapiens OX=9606 GN=LGMN PE=1 SV=1	5109	3	4.78228	6.73688	6.79662	6.79832	0.494381	0.0127379	0.507119	0.000360454	0.50748
	sp|Q68EM7|RHG17_HUMAN	ARHGAP17	Rho GTPase-activating protein 17 OS=Homo sapiens OX=9606 GN=ARHGAP17 PE=1 SV=1	293	6	5.26472	7.41501	6.12951	5.9305	0.494091	-0.274676	0.219414	-0.0476196	0.171795
	sp|Q9Y4K0|LOXL2_HUMAN	LOXL2	Lysyl oxidase homolog 2 OS=Homo sapiens OX=9606 GN=LOXL2 PE=1 SV=1	3348	6	4.83913	6.81354	5.04041	9.06514	0.493658	-0.434864	0.0587939	0.846789	0.905583
	tr|E9PPM1|E9PPM1_HUMAN	TP53I11	Tumor protein p53-inducible protein 11 OS=Homo sapiens OX=9606 GN=TP53I11 PE=1 SV=1	6019	4	6.59924	9.29066	4.34506	8.56305	0.493481	-1.09641	-0.602925	0.978749	0.375824
	sp|Q13454|TUSC3_HUMAN	TUSC3	Tumor suppressor candidate 3 OS=Homo sapiens OX=9606 GN=TUSC3 PE=1 SV=1	4958	3	6.56405	9.23873	7.65222	3.33922	0.493109	-0.271817	0.221292	-1.19637	-0.975077
	sp|O94925|GLSK_HUMAN	GLS	Glutaminase kidney isoform, mitochondrial OS=Homo sapiens OX=9606 GN=GLS PE=1 SV=1	3481	18	5.38874	7.57865	6.04156	7.18628	0.491993	-0.327019	0.164974	0.250322	0.415296
	tr|A0A075B749|A0A075B749_HUMAN	PDE4DIP	Myomegalin OS=Homo sapiens OX=9606 GN=PDE4DIP PE=1 SV=2	2083	5	5.44772	7.65559	6.29857	6.516	0.490862	-0.281488	0.209373	0.0489626	0.258336
	sp|P33121|ACSL1_HUMAN	ACSL1	Long-chain-fatty-acid--CoA ligase 1 OS=Homo sapiens OX=9606 GN=ACSL1 PE=1 SV=1	1659	18	5.89608	8.28272	7.39501	5.84019	0.490347	-0.163552	0.326795	-0.340535	-0.0137404
	tr|F8VQD4|F8VQD4_HUMAN	C12orf75	Chromosome 12 open reading frame 75 (Fragment) OS=Homo sapiens OX=9606 GN=C12orf75 PE=1 SV=2	4370	2	5.94021	8.33478	6.85971	8.0084	0.488629	-0.280997	0.207632	0.223367	0.430999
	sp|Q8NFT2|STEA2_HUMAN	STEAP2	Metalloreductase STEAP2 OS=Homo sapiens OX=9606 GN=STEAP2 PE=1 SV=3	6022	2	4.06809	5.7058	8.06527	9.61108	0.488077	0.499295	0.987372	0.252975	1.24035
	tr|A0A0U1RQM3|A0A0U1RQM3_HUMAN	MTHFS	5-formyltetrahydrofolate cyclo-ligase OS=Homo sapiens OX=9606 GN=MTHFS PE=1 SV=1	5959	2	7.01516	9.83674	6.43865	5.40621	0.487705	-0.611421	-0.123716	-0.25214	-0.375856
	sp|Q16881|TRXR1_HUMAN	TXNRD1	Thioredoxin reductase 1, cytoplasmic OS=Homo sapiens OX=9606 GN=TXNRD1 PE=1 SV=3	1488	22	4.93206	6.91219	6.23348	6.07911	0.486953	-0.149106	0.337847	-0.0361785	0.301669
	sp|Q5T3I0-3|GPTC4_HUMAN	GPATCH4	Isoform 3 of G patch domain-containing protein 4 OS=Homo sapiens OX=9606 GN=GPATCH4	1499	3	4.89251	6.85223	4.87919	4.64206	0.486	-0.48993	-0.00393067	-0.0718795	-0.0758102
	sp|P31431|SDC4_HUMAN	SDC4	Syndecan-4 OS=Homo sapiens OX=9606 GN=SDC4 PE=1 SV=2	1470	2	7.02663	9.83731	6.08349	6.45359	0.48543	-0.693364	-0.207933	0.0852034	-0.12273
	sp|Q9NUB1|ACS2L_HUMAN	ACSS1	Acetyl-coenzyme A synthetase 2-like, mitochondrial OS=Homo sapiens OX=9606 GN=ACSS1 PE=1 SV=2	4216	3	5.76941	8.07718	5.92355	5.99664	0.485427	-0.447391	0.0380362	0.0176935	0.0557297
	sp|Q9NZ45|CISD1_HUMAN	CISD1	CDGSH iron-sulfur domain-containing protein 1 OS=Homo sapiens OX=9606 GN=CISD1 PE=1 SV=1	2215	4	5.68727	7.95334	7.70382	4.65055	0.483825	-0.0459878	0.437837	-0.728172	-0.290335
	sp|Q16822|PCKGM_HUMAN	PCK2	Phosphoenolpyruvate carboxykinase [GTP], mitochondrial OS=Homo sapiens OX=9606 GN=PCK2 PE=1 SV=4	3301	26	4.59778	6.41535	6.28348	6.39715	0.48059	-0.0299646	0.450625	0.0258678	0.476493
	tr|G3XAI2|G3XAI2_HUMAN	LAMB1	Laminin subunit beta-1 OS=Homo sapiens OX=9606 GN=LAMB1 PE=1 SV=1	421	15	6.27564	8.75332	6.40548	4.33612	0.480067	-0.450523	0.0295437	-0.562902	-0.533358
	sp|Q96C23|GALM_HUMAN	GALM	Aldose 1-epimerase OS=Homo sapiens OX=9606 GN=GALM PE=1 SV=1	5882	4	5.33007	7.42684	6.40971	7.17467	0.478594	-0.212489	0.266105	0.162653	0.428758
	sp|O43184|ADA12_HUMAN	ADAM12	Disintegrin and metalloproteinase domain-containing protein 12 OS=Homo sapiens OX=9606 GN=ADAM12 PE=1 SV=3	5617	4	5.06581	7.05409	6.21963	6.9341	0.477666	-0.181631	0.296035	0.156879	0.452914
	sp|P04083|ANXA1_HUMAN	ANXA1	Annexin A1 OS=Homo sapiens OX=9606 GN=ANXA1 PE=1 SV=2	559	16	4.65483	6.47759	5.66028	6.79908	0.476728	-0.194585	0.282143	0.264467	0.54661
	tr|J3KNQ4|J3KNQ4_HUMAN	PARVA	Alpha-parvin OS=Homo sapiens OX=9606 GN=PARVA PE=1 SV=1	3524	10	5.52018	7.67843	6.20431	6.97372	0.476095	-0.307541	0.168554	0.168658	0.337212
	sp|Q9P0K7-2|RAI14_HUMAN	RAI14	Isoform 2 of Ankycorbin OS=Homo sapiens OX=9606 GN=RAI14	978	19	5.59276	7.77037	5.94674	6.46707	0.474421	-0.385884	0.0885373	0.121015	0.209552
	sp|P07948|LYN_HUMAN	LYN	Tyrosine-protein kinase Lyn OS=Homo sapiens OX=9606 GN=LYN PE=1 SV=3	6268	2	4.38911	6.09419	5.14828	4.86011	0.473505	-0.243342	0.230163	-0.0831025	0.147061
	sp|Q9H8H3|MET7A_HUMAN	METTL7A	Methyltransferase-like protein 7A OS=Homo sapiens OX=9606 GN=METTL7A PE=1 SV=1	4872	3	5.23977	7.26779	5.6758	5.13333	0.472014	-0.356693	0.115321	-0.14493	-0.029609
	tr|E7EMB3|E7EMB3_HUMAN	CALM2	Calmodulin-2 OS=Homo sapiens OX=9606 GN=CALM2 PE=1 SV=1	3775	4	5.54107	7.67429	6.6375	7.03283	0.46987	-0.209394	0.260476	0.0834661	0.343942
	tr|C9K0J5|C9K0J5_HUMAN	RAPH1	Ras association (RalGDS/AF-6) and pleckstrin homology domains 1, isoform CRA_b OS=Homo sapiens OX=9606 GN=RAPH1 PE=1 SV=1	930	10	5.62782	7.79057	6.3383	9.29151	0.469152	-0.297634	0.171519	0.551817	0.723336
	sp|Q15149|PLEC_HUMAN	PLEC	Plectin OS=Homo sapiens OX=9606 GN=PLEC PE=1 SV=3	130	33	5.73574	7.93725	6.50267	7.24059	0.468659	-0.287606	0.181053	0.155076	0.336129
	sp|Q9H694|BICC1_HUMAN	BICC1	Protein bicaudal C homolog 1 OS=Homo sapiens OX=9606 GN=BICC1 PE=1 SV=2	4948	7	5.73234	7.92674	7.65114	6.32931	0.467603	-0.0510517	0.416551	-0.273626	0.142925
	sp|P37837|TALDO_HUMAN	TALDO1	Transaldolase OS=Homo sapiens OX=9606 GN=TALDO1 PE=1 SV=2	403	22	5.42173	7.49541	6.60401	6.25616	0.467253	-0.182665	0.284588	-0.0780649	0.206523
	sp|Q8N0T1|RBIS_HUMAN	RBIS	Ribosomal biogenesis factor OS=Homo sapiens OX=9606 GN=RBIS PE=1 SV=4	1279	3	6.16838	8.51802	6.13617	5.88702	0.465626	-0.473181	-0.00755437	-0.0597997	-0.0673541
	sp|P08473|NEP_HUMAN	MME	Neprilysin OS=Homo sapiens OX=9606 GN=MME PE=1 SV=2	1584	26	5.55497	7.66627	6.66886	6.80835	0.464744	-0.201085	0.263659	0.0298661	0.293525
	sp|Q8TD30|ALAT2_HUMAN	GPT2	Alanine aminotransferase 2 OS=Homo sapiens OX=9606 GN=GPT2 PE=1 SV=1	2280	7	5.18536	7.13866	5.38435	5.6852	0.46121	-0.406882	0.0543281	0.0784411	0.132769
	sp|P13611|CSPG2_HUMAN	VCAN	Versican core protein OS=Homo sapiens OX=9606 GN=VCAN PE=1 SV=3	2750	17	5.30358	7.29807	6.90846	5.70214	0.46055	-0.0791522	0.381398	-0.276859	0.104539
	sp|Q8N3D4|EH1L1_HUMAN	EHBP1L1	EH domain-binding protein 1-like protein 1 OS=Homo sapiens OX=9606 GN=EHBP1L1 PE=1 SV=2	977	9	5.85183	8.05006	7.59963	6.34827	0.460112	-0.08307	0.377042	-0.259566	0.117476
	sp|Q9Y2D5-6|AKAP2_HUMAN	AKAP2	Isoform 4 of A-kinase anchor protein 2 OS=Homo sapiens OX=9606 GN=AKAP2	2538	17	5.64771	7.76767	6.37755	4.19571	0.459817	-0.284481	0.175336	-0.604084	-0.428748
	sp|Q8IVF2|AHNK2_HUMAN	AHNAK2	Protein AHNAK2 OS=Homo sapiens OX=9606 GN=AHNAK2 PE=1 SV=2	290	32	4.7894	6.57983	6.99652	10.1188	0.458206	0.0885872	0.546793	0.532327	1.07912
	sp|P60981|DEST_HUMAN	DSTN	Destrin OS=Homo sapiens OX=9606 GN=DSTN PE=1 SV=3	2918	12	4.77267	6.54775	5.83599	6.07803	0.456202	-0.166022	0.29018	0.0586272	0.348807
	tr|A0A0A0MSD0|A0A0A0MSD0_HUMAN	SVEP1	Sushi, von Willebrand factor type A, EGF and pentraxin domain-containing protein 1 OS=Homo sapiens OX=9606 GN=SVEP1 PE=1 SV=1	3135	2	5.63395	7.72327	7.83668	6.45415	0.455066	0.0210302	0.476096	-0.280015	0.196081
	sp|Q969T9|WBP2_HUMAN	WBP2	WW domain-binding protein 2 OS=Homo sapiens OX=9606 GN=WBP2 PE=1 SV=1	845	5	5.75682	7.8906	5.16896	5.38227	0.454864	-0.610263	-0.155399	0.0583408	-0.0970578
	sp|Q9BY32|ITPA_HUMAN	ITPA	Inosine triphosphate pyrophosphatase OS=Homo sapiens OX=9606 GN=ITPA PE=1 SV=2	5413	8	4.9633	6.79752	7.17684	8.32737	0.453709	0.0783396	0.532048	0.214514	0.746562
	sp|Q9UIW2|PLXA1_HUMAN	PLXNA1	Plexin-A1 OS=Homo sapiens OX=9606 GN=PLXNA1 PE=1 SV=3	115	6	5.84297	7.99816	6.91714	8.48689	0.452967	-0.209493	0.243473	0.29506	0.538533
	sp|B0I1T2|MYO1G_HUMAN	MYO1G	Unconventional myosin-Ig OS=Homo sapiens OX=9606 GN=MYO1G PE=1 SV=2	255	3	4.37151	5.98201	6.67791	8.98242	0.452499	0.158768	0.611267	0.427707	1.03897
	sp|O95490-6|AGRL2_HUMAN	ADGRL2	Isoform 6 of Adhesion G protein-coupled receptor L2 OS=Homo sapiens OX=9606 GN=ADGRL2	5238	5	4.82231	6.59499	5.82559	6.61463	0.451645	-0.178966	0.272679	0.183258	0.455937
	sp|Q6SZW1|SARM1_HUMAN	SARM1	Sterile alpha and TIR motif-containing protein 1 OS=Homo sapiens OX=9606 GN=SARM1 PE=1 SV=1	3322	5	6.15278	8.41192	7.60087	5.35032	0.451197	-0.14627	0.304927	-0.506539	-0.201612
	sp|P02751-15|FINC_HUMAN	FN1	Isoform 15 of Fibronectin OS=Homo sapiens OX=9606 GN=FN1	2500	25	5.79319	7.91976	6.19609	6.98457	0.451099	-0.354099	0.0970001	0.172814	0.269814
	sp|Q8WWW0|RASF5_HUMAN	RASSF5	Ras association domain-containing protein 5 OS=Homo sapiens OX=9606 GN=RASSF5 PE=1 SV=1	5180	2	3.73646	5.10221	7.00784	6.26355	0.449449	0.457847	0.907297	-0.161988	0.745308
	sp|Q14393-1|GAS6_HUMAN	GAS6	Isoform 2 of Growth arrest-specific protein 6 OS=Homo sapiens OX=9606 GN=GAS6	1237	8	4.96456	6.77866	7.58202	5.45432	0.449335	0.161583	0.610918	-0.475184	0.135734
	sp|P30520|PURA2_HUMAN	ADSS	Adenylosuccinate synthetase isozyme 2 OS=Homo sapiens OX=9606 GN=ADSS PE=1 SV=3	1537	11	6.11633	8.34508	6.71103	6.88612	0.44826	-0.314391	0.133869	0.0371554	0.171025
	sp|Q9P032|NDUF4_HUMAN	NDUFAF4	NADH dehydrogenase [ubiquinone] 1 alpha subcomplex assembly factor 4 OS=Homo sapiens OX=9606 GN=NDUFAF4 PE=1 SV=1	167	5	5.54211	7.55812	6.85851	4.77665	0.447592	-0.140132	0.30746	-0.521895	-0.214435
	sp|Q9ULC3|RAB23_HUMAN	RAB23	Ras-related protein Rab-23 OS=Homo sapiens OX=9606 GN=RAB23 PE=1 SV=1	4568	7	5.34926	7.29179	6.10758	6.2004	0.446934	-0.255674	0.191261	0.0217612	0.213022
	sp|Q13510-2|ASAH1_HUMAN	ASAH1	Isoform 2 of Acid ceramidase OS=Homo sapiens OX=9606 GN=ASAH1	2685	16	5.10378	6.94275	6.5921	7.83446	0.44394	-0.0747691	0.369171	0.249097	0.618268
	sp|O15371|EIF3D_HUMAN	EIF3D	Eukaryotic translation initiation factor 3 subunit D OS=Homo sapiens OX=9606 GN=EIF3D PE=1 SV=1	3176	20	6.10506	8.27241	6.71742	6.25039	0.438304	-0.3004	0.137903	-0.103962	0.0339415
	sp|O75781|PALM_HUMAN	PALM	Paralemmin-1 OS=Homo sapiens OX=9606 GN=PALM PE=1 SV=2	2328	7	3.95819	5.3625	5.03632	9.93449	0.438066	-0.0905353	0.347531	0.980075	1.32761
	sp|O94919|ENDD1_HUMAN	ENDOD1	Endonuclease domain-containing 1 protein OS=Homo sapiens OX=9606 GN=ENDOD1 PE=1 SV=2	4222	6	4.14223	5.59682	5.29501	7.03675	0.434199	-0.079974	0.354225	0.410278	0.764503
	sp|Q14571|ITPR2_HUMAN	ITPR2	Inositol 1,4,5-trisphosphate receptor type 2 OS=Homo sapiens OX=9606 GN=ITPR2 PE=1 SV=2	232	12	4.66974	6.30957	5.09425	4.16284	0.434198	-0.308673	0.125526	-0.291302	-0.165777
	sp|Q96QU6|1A1L1_HUMAN	ACCS	1-aminocyclopropane-1-carboxylate synthase-like protein 1 OS=Homo sapiens OX=9606 GN=ACCS PE=1 SV=1	4460	2	6.44004	8.69788	7.10848	5.96767	0.433593	-0.291123	0.14247	-0.252373	-0.109903
	sp|P39059|COFA1_HUMAN	COL15A1	Collagen alpha-1(XV) chain OS=Homo sapiens OX=9606 GN=COL15A1 PE=1 SV=2	230	7	5.50844	7.43298	7.64101	6.42376	0.432295	0.0398242	0.472119	-0.250345	0.221774
	sp|Q9NPH0|PPA6_HUMAN	ACP6	Lysophosphatidic acid phosphatase type 6 OS=Homo sapiens OX=9606 GN=ACP6 PE=1 SV=3	2854	2	5.8195	7.85253	5.09149	4.50694	0.432263	-0.62507	-0.192807	-0.175937	-0.368745
	sp|Q8NE86|MCU_HUMAN	MCU	Calcium uniporter protein, mitochondrial OS=Homo sapiens OX=9606 GN=MCU PE=1 SV=1	3393	7	5.61714	7.57199	6.18442	6.63608	0.430837	-0.292034	0.138803	0.101693	0.240496
	sp|Q96C19|EFHD2_HUMAN	EFHD2	EF-hand domain-containing protein D2 OS=Homo sapiens OX=9606 GN=EFHD2 PE=1 SV=1	28	5	5.02116	6.76664	5.19705	8.80472	0.430419	-0.380747	0.0496723	0.760585	0.810257
	sp|Q86SF2|GALT7_HUMAN	GALNT7	N-acetylgalactosaminyltransferase 7 OS=Homo sapiens OX=9606 GN=GALNT7 PE=1 SV=1	1752	9	5.83592	7.86118	5.8545	5.53003	0.429787	-0.4252	0.0045875	-0.0822608	-0.0776733
	sp|O60488|ACSL4_HUMAN	ACSL4	Long-chain-fatty-acid--CoA ligase 4 OS=Homo sapiens OX=9606 GN=ACSL4 PE=1 SV=2	1217	8	6.75207	9.09191	6.56952	6.47296	0.429252	-0.468795	-0.0395422	-0.0213639	-0.0609061
	sp|Q9NZW5|MPP6_HUMAN	MPP6	MAGUK p55 subfamily member 6 OS=Homo sapiens OX=9606 GN=MPP6 PE=1 SV=2	1353	10	5.53029	7.44496	8.04021	6.4165	0.428908	0.110969	0.539877	-0.325445	0.214432
	sp|Q8N5C1|CAHM5_HUMAN	CALHM5	Calcium homeostasis modulator protein 5 OS=Homo sapiens OX=9606 GN=CALHM5 PE=2 SV=1	5042	5	5.56745	7.4859	5.72778	8.65925	0.427158	-0.386199	0.0409589	0.596265	0.637224
	sp|Q8IY33|MILK2_HUMAN	MICALL2	MICAL-like protein 2 OS=Homo sapiens OX=9606 GN=MICALL2 PE=1 SV=1	3804	4	5.93969	7.98391	6.0236	5.96569	0.426707	-0.40647	0.0202371	-0.0139378	0.00629936
	sp|Q68D85|NR3L1_HUMAN	NCR3LG1	Natural cytotoxicity triggering receptor 3 ligand 1 OS=Homo sapiens OX=9606 GN=NCR3LG1 PE=1 SV=1	4760	2	6.27491	8.42249	5.19142	4.83648	0.424653	-0.698119	-0.273465	-0.102171	-0.375637
	sp|P40261|NNMT_HUMAN	NNMT	Nicotinamide N-methyltransferase OS=Homo sapiens OX=9606 GN=NNMT PE=1 SV=1	3163	12	5.01977	6.73333	7.27484	5.22734	0.423699	0.111595	0.535294	-0.476837	0.0584562
	sp|O60669|MOT2_HUMAN	SLC16A7	Monocarboxylate transporter 2 OS=Homo sapiens OX=9606 GN=SLC16A7 PE=1 SV=2	3015	3	6.26663	8.40081	6.14486	7.89387	0.422837	-0.451147	-0.0283097	0.361352	0.333042
	sp|Q8IWA5|CTL2_HUMAN	SLC44A2	Choline transporter-like protein 2 OS=Homo sapiens OX=9606 GN=SLC44A2 PE=1 SV=3	5575	6	5.9008	7.90542	7.47575	6.86341	0.421933	-0.0806238	0.341309	-0.123293	0.218016
	sp|Q08AM6|VAC14_HUMAN	VAC14	Protein VAC14 homolog OS=Homo sapiens OX=9606 GN=VAC14 PE=1 SV=1	797	20	5.87162	7.85736	6.38016	6.17868	0.420285	-0.300452	0.119833	-0.0462936	0.0735392
	sp|P07919|QCR6_HUMAN	UQCRH	Cytochrome b-c1 complex subunit 6, mitochondrial OS=Homo sapiens OX=9606 GN=UQCRH PE=1 SV=2	3850	2	6.16817	8.25246	7.64772	5.42586	0.419982	-0.109794	0.310187	-0.49518	-0.184993
	sp|P17655|CAN2_HUMAN	CAPN2	Calpain-2 catalytic subunit OS=Homo sapiens OX=9606 GN=CAPN2 PE=1 SV=6	3773	25	5.26393	7.04167	6.7035	7.018	0.419778	-0.0710035	0.348774	0.0661465	0.414921
	sp|P04179|SODM_HUMAN	SOD2	Superoxide dismutase [Mn], mitochondrial OS=Homo sapiens OX=9606 GN=SOD2 PE=1 SV=3	1731	24	6.05647	8.09923	7.02354	4.83383	0.419308	-0.205588	0.213721	-0.539031	-0.32531
	sp|Q8N2H3|PYRD2_HUMAN	PYROXD2	Pyridine nucleotide-disulfide oxidoreductase domain-containing protein 2 OS=Homo sapiens OX=9606 GN=PYROXD2 PE=1 SV=2	3910	2	4.90491	6.55912	3.40743	9.55371	0.419276	-0.944817	-0.525541	1.48738	0.961836
	sp|Q9NZB8-8|MOCS1_HUMAN	MOCS1	Isoform 8 of Molybdenum cofactor biosynthesis protein 1 OS=Homo sapiens OX=9606 GN=MOCS1	792	3	1.8144	2.42282	1.92161	1.65314	0.417197	-0.334372	0.0828257	-0.217107	-0.134281
	sp|Q07352|TISB_HUMAN	ZFP36L1	mRNA decay activator protein ZFP36L1 OS=Homo sapiens OX=9606 GN=ZFP36L1 PE=1 SV=1	2907	4	5.6663	7.56635	6.53045	5.64087	0.417189	-0.212415	0.204774	-0.211263	-0.00648887
	sp|Q15120-2|PDK3_HUMAN	PDK3	Isoform 2 of [Pyruvate dehydrogenase (acetyl-transferring)] kinase isozyme 3, mitochondrial OS=Homo sapiens OX=9606 GN=PDK3	390	2	5.63076	7.5178	8.54066	4.6552	0.41698	0.184038	0.601018	-0.875504	-0.274487
	sp|Q9BY43-2|CHM4A_HUMAN	CHMP4A	Isoform 2 of Charged multivesicular body protein 4a OS=Homo sapiens OX=9606 GN=CHMP4A	1339	3	4.40437	5.87189	5.11067	5.1624	0.414889	-0.200315	0.214574	0.0145309	0.229105
	sp|Q9NZJ9|NUDT4_HUMAN	NUDT4	Diphosphoinositol polyphosphate phosphohydrolase 2 OS=Homo sapiens OX=9606 GN=NUDT4 PE=1 SV=2	130	2	6.11781	8.1527	7.51853	6.03864	0.414262	-0.116828	0.297434	-0.316225	-0.0187912
	sp|Q8WV60|PTCD2_HUMAN	PTCD2	Pentatricopeptide repeat-containing protein 2, mitochondrial OS=Homo sapiens OX=9606 GN=PTCD2 PE=1 SV=3	4361	2	5.97181	7.95771	8.07309	4.88643	0.414184	0.0207689	0.434953	-0.724341	-0.289388
	sp|P78417|GSTO1_HUMAN	GSTO1	Glutathione S-transferase omega-1 OS=Homo sapiens OX=9606 GN=GSTO1 PE=1 SV=2	4386	7	6.13814	8.173	6.02407	6.65202	0.413064	-0.440126	-0.0270622	0.143053	0.115991
	sp|Q86WV6|STING_HUMAN	TMEM173	Stimulator of interferon genes protein OS=Homo sapiens OX=9606 GN=TMEM173 PE=1 SV=1	4586	6	6.70645	8.92886	7.00252	4.61151	0.412926	-0.350601	0.0623245	-0.602634	-0.540309
	sp|Q05932|FOLC_HUMAN	FPGS	Folylpolyglutamate synthase, mitochondrial OS=Homo sapiens OX=9606 GN=FPGS PE=1 SV=3	5792	3	6.12435	8.14272	7.49097	6.12648	0.410954	-0.120358	0.290596	-0.290096	0.000500493
	sp|O14939|PLD2_HUMAN	PLD2	Phospholipase D2 OS=Homo sapiens OX=9606 GN=PLD2 PE=1 SV=2	2019	2	5.93802	7.8923	7.2693	7.44663	0.410465	-0.11863	0.291835	0.0347729	0.326608
	tr|K7N7A8|K7N7A8_HUMAN		DUF4205 domain-containing protein (Fragment) OS=Homo sapiens OX=9606 PE=3 SV=2	6986	2	1.05667	1.40378	11.3534	12.2493	0.409794	3.01573	3.42553	0.109579	3.53511
	sp|Q14019|COTL1_HUMAN	COTL1	Coactosin-like protein OS=Homo sapiens OX=9606 GN=COTL1 PE=1 SV=3	3625	5	4.8015	6.37396	5.71817	8.36508	0.408705	-0.156635	0.25207	0.548825	0.800894
	sp|O95965|ITGBL_HUMAN	ITGBL1	Integrin beta-like protein 1 OS=Homo sapiens OX=9606 GN=ITGBL1 PE=2 SV=1	2376	2	4.86724	6.44271	8.8581	6.46077	0.404564	0.459328	0.863893	-0.45529	0.408602
	sp|Q9Y5X1|SNX9_HUMAN	SNX9	Sorting nexin-9 OS=Homo sapiens OX=9606 GN=SNX9 PE=1 SV=1	2692	12	5.56896	7.37085	7.04793	6.62262	0.404424	-0.0646321	0.339792	-0.0897968	0.249995
	sp|P28827-2|PTPRM_HUMAN	PTPRM	Isoform 2 of Receptor-type tyrosine-protein phosphatase mu OS=Homo sapiens OX=9606 GN=PTPRM	556	5	5.66916	7.48947	7.53758	7.64928	0.401728	0.00923778	0.410966	0.0212229	0.432189
	sp|P60604|UB2G2_HUMAN	UBE2G2	Ubiquitin-conjugating enzyme E2 G2 OS=Homo sapiens OX=9606 GN=UBE2G2 PE=1 SV=1	5466	4	5.6392	7.44377	6.43791	5.53111	0.400541	-0.209441	0.1911	-0.219021	-0.027921
	sp|Q8N139|ABCA6_HUMAN	ABCA6	ATP-binding cassette sub-family A member 6 OS=Homo sapiens OX=9606 GN=ABCA6 PE=1 SV=2	4402	5	5.8123	7.67154	6.42747	7.79863	0.400407	-0.255266	0.145141	0.27897	0.424111
	tr|H3BQK9|H3BQK9_HUMAN	MACF1	Microtubule-actin cross-linking factor 1, isoforms 1/2/3/5 OS=Homo sapiens OX=9606 GN=MACF1 PE=1 SV=1	130	36	5.95266	7.85673	6.32016	7.00884	0.400394	-0.313968	0.0864262	0.149216	0.235642
	sp|Q5ZPR3|CD276_HUMAN	CD276	CD276 antigen OS=Homo sapiens OX=9606 GN=CD276 PE=1 SV=1	3719	5	2.34509	3.09517	3.54268	3.16114	0.400372	0.194822	0.595194	-0.164394	0.4308
	tr|G3XAH0|G3XAH0_HUMAN	SEPTIN5	HCG2002594, isoform CRA_c OS=Homo sapiens OX=9606 GN=SEPTIN5 PE=1 SV=1	1515	7	5.3932	7.11666	7.184	7.52591	0.400058	0.0135874	0.413645	0.067079	0.480725
	sp|Q86YB7|ECHD2_HUMAN	ECHDC2	Enoyl-CoA hydratase domain-containing protein 2, mitochondrial OS=Homo sapiens OX=9606 GN=ECHDC2 PE=1 SV=2	1779	2	6.59625	8.69903	6.92924	6.26934	0.399208	-0.328157	0.071051	-0.144383	-0.0733321
	sp|Q8TB36|GDAP1_HUMAN	GDAP1	Ganglioside-induced differentiation-associated protein 1 OS=Homo sapiens OX=9606 GN=GDAP1 PE=1 SV=3	6171	4	4.97976	6.56499	5.47581	8.17816	0.398718	-0.261721	0.136997	0.578703	0.7157
	sp|Q00537|CDK17_HUMAN	CDK17	Cyclin-dependent kinase 17 OS=Homo sapiens OX=9606 GN=CDK17 PE=1 SV=2	5744	4	5.99695	7.87844	7.59283	6.40839	0.39368	-0.053271	0.340409	-0.244675	0.0957333
	sp|P20749|BCL3_HUMAN	BCL3	B-cell lymphoma 3 protein OS=Homo sapiens OX=9606 GN=BCL3 PE=1 SV=2	680	2	6.3496	8.34039	6.77382	7.64356	0.393448	-0.300144	0.0933039	0.174273	0.267577
	sp|P48507|GSH0_HUMAN	GCLM	Glutamate--cysteine ligase regulatory subunit OS=Homo sapiens OX=9606 GN=GCLM PE=1 SV=1	4689	5	5.91906	7.76124	6.5814	6.20438	0.390921	-0.237894	0.153026	-0.0851064	0.0679198
	sp|Q63HQ0|AP1AR_HUMAN	AP1AR	AP-1 complex-associated regulatory protein OS=Homo sapiens OX=9606 GN=AP1AR PE=1 SV=1	4838	3	5.44402	7.12813	6.30069	6.30679	0.388851	-0.178015	0.210836	0.00139645	0.212233
	sp|Q9BXW7|HDHD5_HUMAN	HDHD5	Haloacid dehalogenase-like hydrolase domain-containing 5 OS=Homo sapiens OX=9606 GN=HDHD5 PE=1 SV=1	2767	7	5.77924	7.56645	7.51601	5.72754	0.388735	-0.00964896	0.379086	-0.392051	-0.012965
	sp|Q13823|NOG2_HUMAN	GNL2	Nucleolar GTP-binding protein 2 OS=Homo sapiens OX=9606 GN=GNL2 PE=1 SV=1	4653	9	6.2387	8.16653	5.91829	5.80383	0.388476	-0.464541	-0.076065	-0.0281759	-0.104241
	sp|Q9HBK9|AS3MT_HUMAN	AS3MT	Arsenite methyltransferase OS=Homo sapiens OX=9606 GN=AS3MT PE=1 SV=3	3477	2	5.38425	7.04309	6.10508	7.04414	0.387463	-0.2062	0.181263	0.206414	0.387677
	tr|A0A024R644|A0A024R644_HUMAN	CLN5	Ceroid-lipofuscinosis neuronal protein 5 OS=Homo sapiens OX=9606 GN=CLN5 PE=1 SV=1	5525	3	4.99787	6.52973	7.5895	8.31481	0.385709	0.216982	0.602691	0.131678	0.734369
	sp|Q9BV79|MECR_HUMAN	MECR	Enoyl-[acyl-carrier-protein] reductase, mitochondrial OS=Homo sapiens OX=9606 GN=MECR PE=1 SV=2	3862	4	5.52179	7.2107	7.11961	6.60441	0.385003	-0.0183411	0.366662	-0.108368	0.258294
	sp|Q7L592|NDUF7_HUMAN	NDUFAF7	Protein arginine methyltransferase NDUFAF7, mitochondrial OS=Homo sapiens OX=9606 GN=NDUFAF7 PE=1 SV=1	4001	4	5.53118	7.2222	7.30511	5.22104	0.384851	0.0164666	0.401318	-0.484568	-0.0832501
	sp|Q9UMS0|NFU1_HUMAN	NFU1	NFU1 iron-sulfur cluster scaffold homolog, mitochondrial OS=Homo sapiens OX=9606 GN=NFU1 PE=1 SV=2	5601	4	5.80485	7.57766	6.55265	5.6352	0.384494	-0.209673	0.174821	-0.217612	-0.0427911
	sp|A0FGR8-6|ESYT2_HUMAN	ESYT2	Isoform 6 of Extended synaptotagmin-2 OS=Homo sapiens OX=9606 GN=ESYT2	578	15	5.75309	7.50543	7.38123	6.63634	0.383599	-0.0240735	0.359526	-0.153474	0.206052
	sp|Q9HAC7-3|SUCHY_HUMAN	SUGCT	Isoform 3 of Succinate--hydroxymethylglutarate CoA-transferase OS=Homo sapiens OX=9606 GN=SUGCT	5266	3	5.93394	7.73537	7.81314	6.05661	0.38248	0.0144319	0.396912	-0.36739	0.0295214
	sp|O95563|MPC2_HUMAN	MPC2	Mitochondrial pyruvate carrier 2 OS=Homo sapiens OX=9606 GN=MPC2 PE=1 SV=1	6400	3	6.17356	8.04649	7.33588	5.31007	0.382257	-0.133388	0.248869	-0.466238	-0.21737
	sp|Q5TDH0-3|DDI2_HUMAN	DDI2	Isoform 3 of Protein DDI1 homolog 2 OS=Homo sapiens OX=9606 GN=DDI2	1272	7	5.92212	7.7183	7.25268	6.54388	0.382169	-0.0897696	0.292399	-0.148366	0.144033
	sp|P15559|NQO1_HUMAN	NQO1	NAD(P)H dehydrogenase [quinone] 1 OS=Homo sapiens OX=9606 GN=NQO1 PE=1 SV=1	1945	15	6.46653	8.42751	6.18365	5.09818	0.382114	-0.446649	-0.064535	-0.278474	-0.343009
	sp|P31327-3|CPSM_HUMAN	CPS1	Isoform 3 of Carbamoyl-phosphate synthase [ammonia], mitochondrial OS=Homo sapiens OX=9606 GN=CPS1	174	16	4.53361	5.8905	4.82204	8.52691	0.377731	-0.288748	0.0889823	0.82238	0.911363
	sp|O43293|DAPK3_HUMAN	DAPK3	Death-associated protein kinase 3 OS=Homo sapiens OX=9606 GN=DAPK3 PE=1 SV=1	5529	2	5.70185	7.40574	6.21076	6.39954	0.377213	-0.253873	0.12334	0.0431972	0.166537
	sp|Q05209|PTN12_HUMAN	PTPN12	Tyrosine-protein phosphatase non-receptor type 12 OS=Homo sapiens OX=9606 GN=PTPN12 PE=1 SV=3	1583	7	6.45862	8.38653	6.3415	7.0743	0.376849	-0.40325	-0.0264011	0.157763	0.131362
	sp|Q7LGC8|CHST3_HUMAN	CHST3	Carbohydrate sulfotransferase 3 OS=Homo sapiens OX=9606 GN=CHST3 PE=1 SV=3	6525	3	6.76066	8.77452	6.81709	6.24596	0.376157	-0.364164	0.011993	-0.126234	-0.114241
	sp|P34896|GLYC_HUMAN	SHMT1	Serine hydroxymethyltransferase, cytosolic OS=Homo sapiens OX=9606 GN=SHMT1 PE=1 SV=1	298	3	5.53889	7.18874	6.02506	6.17288	0.376142	-0.254763	0.121379	0.0349666	0.156346
	sp|Q9BZF3-5|OSBL6_HUMAN	OSBPL6	Isoform 5 of Oxysterol-binding protein-related protein 6 OS=Homo sapiens OX=9606 GN=OSBPL6	412	4	5.6404	7.30864	6.65082	6.02283	0.373805	-0.136069	0.237735	-0.143091	0.0946441
	sp|Q9BQ69|MACD1_HUMAN	MACROD1	ADP-ribose glycohydrolase MACROD1 OS=Homo sapiens OX=9606 GN=MACROD1 PE=1 SV=2	236	2	5.00837	6.48758	7.13309	5.20479	0.373339	0.136847	0.510186	-0.454686	0.0555002
	sp|P98160|PGBM_HUMAN	HSPG2	Basement membrane-specific heparan sulfate proteoglycan core protein OS=Homo sapiens OX=9606 GN=HSPG2 PE=1 SV=4	248	10	5.50448	7.12964	6.45301	7.81826	0.373222	-0.143856	0.229366	0.276874	0.50624
	sp|Q8TEW8|PAR3L_HUMAN	PARD3B	Partitioning defective 3 homolog B OS=Homo sapiens OX=9606 GN=PARD3B PE=1 SV=2	869	7	5.64175	7.30652	7.25956	6.76417	0.373042	-0.00930364	0.363738	-0.101969	0.261769
	sp|Q9BQS7-3|HEPH_HUMAN	HEPH	Isoform 3 of Hephaestin OS=Homo sapiens OX=9606 GN=HEPH	6833	2	5.95814	7.71493	7.66804	6.48627	0.372792	-0.00879426	0.363998	-0.241471	0.122527
	sp|Q9UHB6-4|LIMA1_HUMAN	LIMA1	Isoform 4 of LIM domain and actin-binding protein 1 OS=Homo sapiens OX=9606 GN=LIMA1	141	15	6.24428	8.07518	5.87868	8.8345	0.370959	-0.458003	-0.0870442	0.587657	0.500612
	sp|Q9NWZ8|GEMI8_HUMAN	GEMIN8	Gem-associated protein 8 OS=Homo sapiens OX=9606 GN=GEMIN8 PE=1 SV=1	6218	2	6.07947	7.86089	7.2394	7.37127	0.370746	-0.118823	0.251923	0.0260441	0.277967
	sp|Q9NR30|DDX21_HUMAN	DDX21	Nucleolar RNA helicase 2 OS=Homo sapiens OX=9606 GN=DDX21 PE=1 SV=5	522	16	5.13428	6.63867	4.47111	4.77517	0.370734	-0.570262	-0.199528	0.0949206	-0.104607
	sp|Q86XE3|MICU3_HUMAN	MICU3	Calcium uptake protein 3, mitochondrial OS=Homo sapiens OX=9606 GN=MICU3 PE=1 SV=1	4683	3	6.53018	8.44085	7.01732	6.49152	0.370264	-0.266468	0.103797	-0.112364	-0.00856717
	tr|A0A0U1RRM6|A0A0U1RRM6_HUMAN	ENAH	Protein enabled homolog OS=Homo sapiens OX=9606 GN=ENAH PE=1 SV=1	532	15	6.07201	7.84777	7.38481	6.44305	0.370109	-0.0877226	0.282387	-0.196817	0.0855696
	tr|A0A3B3IRM4|A0A3B3IRM4_HUMAN	XYLB	Xylulose kinase OS=Homo sapiens OX=9606 GN=XYLB PE=1 SV=1	1310	2	2.66607	3.44573	4.24315	3.89461	0.370095	0.300325	0.67042	-0.123657	0.546762
	sp|P20290|BTF3_HUMAN	BTF3	Transcription factor BTF3 OS=Homo sapiens OX=9606 GN=BTF3 PE=1 SV=1	2385	2	5.62644	7.2711	5.70789	5.75394	0.369951	-0.349216	0.0207356	0.0115931	0.0323287
	sp|Q86UL8|MAGI2_HUMAN	MAGI2	Membrane-associated guanylate kinase, WW and PDZ domain-containing protein 2 OS=Homo sapiens OX=9606 GN=MAGI2 PE=1 SV=3	32	9	6.2337	8.05228	7.21435	6.928	0.369308	-0.158527	0.210781	-0.0584312	0.15235
	sp|Q96AC1-3|FERM2_HUMAN	FERMT2	Isoform 3 of Fermitin family homolog 2 OS=Homo sapiens OX=9606 GN=FERMT2	4192	17	5.97833	7.71863	6.7404	7.42948	0.368601	-0.195511	0.17309	0.140429	0.313519
	sp|Q9UDR5|AASS_HUMAN	AASS	Alpha-aminoadipic semialdehyde synthase, mitochondrial OS=Homo sapiens OX=9606 GN=AASS PE=1 SV=1	2471	15	5.10703	6.59303	6.59516	6.69993	0.368457	0.000464555	0.368921	0.0227402	0.391662
	sp|Q9NPL8|TIDC1_HUMAN	TIMMDC1	Complex I assembly factor TIMMDC1, mitochondrial OS=Homo sapiens OX=9606 GN=TIMMDC1 PE=1 SV=2	5945	3	5.92286	7.64495	6.61025	5.7285	0.368212	-0.209802	0.158409	-0.206548	-0.0481386
	sp|Q9Y305-4|ACOT9_HUMAN	ACOT9	Isoform 4 of Acyl-coenzyme A thioesterase 9, mitochondrial OS=Homo sapiens OX=9606 GN=ACOT9	3074	13	5.60544	7.22796	7.28089	6.37559	0.366762	0.0105256	0.377287	-0.191556	0.185731
	sp|Q04446|GLGB_HUMAN	GBE1	1,4-alpha-glucan-branching enzyme OS=Homo sapiens OX=9606 GN=GBE1 PE=1 SV=3	3119	16	5.05142	6.51239	7.326	6.38692	0.366497	0.169839	0.536336	-0.197905	0.338432
	sp|Q14249|NUCG_HUMAN	ENDOG	Endonuclease G, mitochondrial OS=Homo sapiens OX=9606 GN=ENDOG PE=1 SV=4	2183	3	5.52119	7.11488	5.1745	5.17355	0.365862	-0.459421	-0.0935594	-0.000264428	-0.0938238
	sp|Q9NRX1|PNO1_HUMAN	PNO1	RNA-binding protein PNO1 OS=Homo sapiens OX=9606 GN=PNO1 PE=1 SV=1	4798	4	6.63022	8.54001	6.3029	6.75089	0.36518	-0.438222	-0.0730417	0.099063	0.0260213
	sp|P10301|RRAS_HUMAN	RRAS	Ras-related protein R-Ras OS=Homo sapiens OX=9606 GN=RRAS PE=1 SV=1	4204	10	5.76775	7.42672	6.26612	7.54415	0.364716	-0.245152	0.119564	0.267785	0.387349
	sp|Q8ND30|LIPB2_HUMAN	PPFIBP2	Liprin-beta-2 OS=Homo sapiens OX=9606 GN=PPFIBP2 PE=1 SV=3	317	6	6.44351	8.27594	7.3681	5.81654	0.361075	-0.167629	0.193446	-0.341133	-0.147688
	tr|A0A0J9YXF2|A0A0J9YXF2_HUMAN	PON2	Paraoxonase 2, isoform CRA_a OS=Homo sapiens OX=9606 GN=PON2 PE=1 SV=1	5157	10	4.92657	6.30914	6.27544	5.1982	0.35686	-0.00772751	0.349132	-0.271704	0.0774276
	sp|O14974|MYPT1_HUMAN	PPP1R12A	Protein phosphatase 1 regulatory subunit 12A OS=Homo sapiens OX=9606 GN=PPP1R12A PE=1 SV=1	5029	15	5.09297	6.51705	5.96292	5.46413	0.35571	-0.1282	0.22751	-0.126027	0.101484
	sp|Q9NQC3|RTN4_HUMAN	RTN4	Reticulon-4 OS=Homo sapiens OX=9606 GN=RTN4 PE=1 SV=2	1072	9	5.87316	7.51376	6.39513	7.41529	0.355398	-0.232563	0.122835	0.213531	0.336365
	sp|Q7LBR1|CHM1B_HUMAN	CHMP1B	Charged multivesicular body protein 1b OS=Homo sapiens OX=9606 GN=CHMP1B PE=1 SV=1	5984	4	5.57841	7.13072	5.5479	6.17181	0.354194	-0.362108	-0.00791392	0.153753	0.145839
	sp|P26232|CTNA2_HUMAN	CTNNA2	Catenin alpha-2 OS=Homo sapiens OX=9606 GN=CTNNA2 PE=1 SV=5	27	9	5.98105	7.64433	7.27301	6.9327	0.353992	-0.0718378	0.282154	-0.0691356	0.213019
	sp|P23470|PTPRG_HUMAN	PTPRG	Receptor-type tyrosine-protein phosphatase gamma OS=Homo sapiens OX=9606 GN=PTPRG PE=1 SV=4	6595	2	6.1414	7.84881	6.79987	8.6151	0.353906	-0.206967	0.146938	0.34136	0.488298
	sp|Q9H0X4|F234A_HUMAN	FAM234A	Protein FAM234A OS=Homo sapiens OX=9606 GN=FAM234A PE=1 SV=1	5781	2	1.76928	2.26066	2.6763	2.19196	0.353584	0.243494	0.597077	-0.288022	0.309056
	sp|P17813|EGLN_HUMAN	ENG	Endoglin OS=Homo sapiens OX=9606 GN=ENG PE=1 SV=2	3117	11	4.56823	5.83599	4.8134	5.00757	0.353343	-0.277921	0.0754226	0.0570553	0.132478
	tr|F8W7S1|F8W7S1_HUMAN	MIGA1	Mitoguardin 1 OS=Homo sapiens OX=9606 GN=MIGA1 PE=1 SV=2	679	3	4.12059	5.26242	4.58775	3.97966	0.352878	-0.197942	0.154936	-0.205141	-0.0502046
	sp|O94832|MYO1D_HUMAN	MYO1D	Unconventional myosin-Id OS=Homo sapiens OX=9606 GN=MYO1D PE=1 SV=2	255	20	4.50459	5.75272	6.57133	8.63777	0.35285	0.191942	0.544791	0.394473	0.939264
	sp|Q9BRQ8|AIFM2_HUMAN	AIFM2	Apoptosis-inducing factor 2 OS=Homo sapiens OX=9606 GN=AIFM2 PE=1 SV=1	2712	6	5.83394	7.44832	7.01288	5.28495	0.352445	-0.0869084	0.265536	-0.408118	-0.142582
	sp|P04066|FUCO_HUMAN	FUCA1	Tissue alpha-L-fucosidase OS=Homo sapiens OX=9606 GN=FUCA1 PE=1 SV=4	4066	4	4.79795	6.12282	6.12912	4.71871	0.351776	0.00148525	0.353262	-0.377287	-0.0240251
	sp|Q9HC36|MRM3_HUMAN	MRM3	rRNA methyltransferase 3, mitochondrial OS=Homo sapiens OX=9606 GN=MRM3 PE=1 SV=2	2425	4	5.01225	6.38961	6.9558	6.65043	0.35027	0.122487	0.472757	-0.0647692	0.407988
	sp|P37802-2|TAGL2_HUMAN	TAGLN2	Isoform 2 of Transgelin-2 OS=Homo sapiens OX=9606 GN=TAGLN2	4077	22	6.45205	8.22371	5.91185	7.01667	0.350031	-0.47618	-0.126149	0.247178	0.121029
	sp|P06733|ENOA_HUMAN	ENO1	Alpha-enolase OS=Homo sapiens OX=9606 GN=ENO1 PE=1 SV=2	539	29	4.7936	6.109	5.99177	5.68397	0.349828	-0.0279532	0.321875	-0.0760854	0.245789
	sp|P12111|CO6A3_HUMAN	COL6A3	Collagen alpha-3(VI) chain OS=Homo sapiens OX=9606 GN=COL6A3 PE=1 SV=5	145	30	6.12419	7.79831	7.24438	4.36168	0.348642	-0.106299	0.242343	-0.731978	-0.489635
	sp|P38646|GRP75_HUMAN	HSPA9	Stress-70 protein, mitochondrial OS=Homo sapiens OX=9606 GN=HSPA9 PE=1 SV=2	35	25	4.56737	5.81554	4.90931	4.76966	0.348549	-0.244394	0.104156	-0.0416344	0.0625213
	sp|O43707|ACTN4_HUMAN	ACTN4	Alpha-actinin-4 OS=Homo sapiens OX=9606 GN=ACTN4 PE=1 SV=2	994	19	5.83354	7.42576	6.75726	6.73553	0.348169	-0.136101	0.212067	-0.00464654	0.207421
	sp|P37235|HPCL1_HUMAN	HPCAL1	Hippocalcin-like protein 1 OS=Homo sapiens OX=9606 GN=HPCAL1 PE=1 SV=3	3602	6	5.63075	7.1658	5.94228	5.48114	0.3478	-0.270111	0.0776895	-0.116541	-0.0388511
	sp|Q6P4Q7|CNNM4_HUMAN	CNNM4	Metal transporter CNNM4 OS=Homo sapiens OX=9606 GN=CNNM4 PE=1 SV=3	2097	3	6.2456	7.94763	7.57038	5.99901	0.347686	-0.0701593	0.277527	-0.33564	-0.0581138
	sp|Q96C90|PP14B_HUMAN	PPP1R14B	Protein phosphatase 1 regulatory subunit 14B OS=Homo sapiens OX=9606 GN=PPP1R14B PE=1 SV=3	3247	2	6.35129	8.08144	6.78263	8.003	0.347562	-0.252766	0.0947962	0.238696	0.333492
	sp|O75410|TACC1_HUMAN	TACC1	Transforming acidic coiled-coil-containing protein 1 OS=Homo sapiens OX=9606 GN=TACC1 PE=1 SV=2	254	8	6.27248	7.97526	7.46765	5.6128	0.346496	-0.0948782	0.251617	-0.411931	-0.160314
	sp|Q9NZN4|EHD2_HUMAN	EHD2	EH domain-containing protein 2 OS=Homo sapiens OX=9606 GN=EHD2 PE=1 SV=2	764	18	5.6559	7.19096	6.79713	8.28831	0.346428	-0.08126	0.265168	0.286153	0.551321
	sp|P32456|GBP2_HUMAN	GBP2	Guanylate-binding protein 2 OS=Homo sapiens OX=9606 GN=GBP2 PE=1 SV=3	1071	11	4.63567	5.89354	5.8224	5.69126	0.346356	-0.0175189	0.328837	-0.0328654	0.295971
	sp|Q9NSU2-1|TREX1_HUMAN	TREX1	Isoform 1 of Three-prime repair exonuclease 1 OS=Homo sapiens OX=9606 GN=TREX1	6575	2	4.21601	5.35925	6.19195	5.6081	0.346152	0.208363	0.554515	-0.142882	0.411632
	sp|O00154|BACH_HUMAN	ACOT7	Cytosolic acyl coenzyme A thioester hydrolase OS=Homo sapiens OX=9606 GN=ACOT7 PE=1 SV=3	437	9	3.17548	4.03553	3.42871	3.29022	0.345785	-0.235092	0.110693	-0.0594796	0.0512131
	sp|Q9UJ83|HACL1_HUMAN	HACL1	2-hydroxyacyl-CoA lyase 1 OS=Homo sapiens OX=9606 GN=HACL1 PE=1 SV=2	5519	3	6.3592	8.08109	6.78822	5.69872	0.345703	-0.251515	0.0941883	-0.252395	-0.158207
	tr|A0A0U1RQW6|A0A0U1RQW6_HUMAN	DIP2C	Disco-interacting protein 2 homolog C OS=Homo sapiens OX=9606 GN=DIP2C PE=1 SV=1	88	9	6.2011	7.87849	7.26561	6.96423	0.345395	-0.116835	0.22856	-0.0611207	0.16744
	sp|P52788|SPSY_HUMAN	SMS	Spermine synthase OS=Homo sapiens OX=9606 GN=SMS PE=1 SV=2	702	6	6.40918	8.1247	5.99245	6.39647	0.342175	-0.439168	-0.0969926	0.0941288	-0.00286384
	sp|P55196-5|AFAD_HUMAN	AFDN	Isoform 5 of Afadin OS=Homo sapiens OX=9606 GN=AFDN	4796	9	6.44492	8.16732	6.49566	7.67156	0.3417	-0.330387	0.0113133	0.240044	0.251358
	sp|P60709|ACTB_HUMAN	ACTB	Actin, cytoplasmic 1 OS=Homo sapiens OX=9606 GN=ACTB PE=1 SV=1	1360	34	5.03077	6.37499	5.9649	6.24805	0.341643	-0.095924	0.245719	0.0669076	0.312627
	sp|Q12849|GRSF1_HUMAN	GRSF1	G-rich sequence factor 1 OS=Homo sapiens OX=9606 GN=GRSF1 PE=1 SV=3	5553	10	5.40275	6.84587	6.09545	5.34299	0.34154	-0.1675	0.17404	-0.190085	-0.0160457
	sp|P06756|ITAV_HUMAN	ITGAV	Integrin alpha-V OS=Homo sapiens OX=9606 GN=ITGAV PE=1 SV=2	1484	26	4.97266	6.30089	7.33685	8.11639	0.341537	0.219607	0.561144	0.145677	0.70682
	tr|A0A2R8Y5A3|A0A2R8Y5A3_HUMAN	CTNNB1	Catenin beta-1 OS=Homo sapiens OX=9606 GN=CTNNB1 PE=1 SV=1	355	13	5.74493	7.27794	7.40594	6.51239	0.341242	0.0251514	0.366393	-0.185494	0.180899
	tr|A0A3B3IRV5|A0A3B3IRV5_HUMAN	HEBP1	Heme-binding protein 1 (Fragment) OS=Homo sapiens OX=9606 GN=HEBP1 PE=1 SV=1	306	3	6.60247	8.36305	6.69625	7.46296	0.341023	-0.320675	0.0203475	0.156394	0.176741
	sp|Q8WVX9|FACR1_HUMAN	FAR1	Fatty acyl-CoA reductase 1 OS=Homo sapiens OX=9606 GN=FAR1 PE=1 SV=1	1775	2	7.17369	9.08537	6.5494	5.96321	0.340829	-0.472182	-0.131354	-0.135272	-0.266626
	sp|Q14166|TTL12_HUMAN	TTLL12	Tubulin--tyrosine ligase-like protein 12 OS=Homo sapiens OX=9606 GN=TTLL12 PE=1 SV=2	1125	12	4.86824	6.16192	5.30605	5.70563	0.339979	-0.215742	0.124237	0.104748	0.228985
	sp|Q9Y696|CLIC4_HUMAN	CLIC4	Chloride intracellular channel protein 4 OS=Homo sapiens OX=9606 GN=CLIC4 PE=1 SV=4	1469	13	5.10301	6.44945	5.58128	6.82827	0.337826	-0.208579	0.129247	0.290923	0.42017
	sp|P63096|GNAI1_HUMAN	GNAI1	Guanine nucleotide-binding protein G(i) subunit alpha-1 OS=Homo sapiens OX=9606 GN=GNAI1 PE=1 SV=2	2160	3	5.98354	7.55568	6.35508	9.3955	0.336563	-0.249651	0.0869126	0.564058	0.650971
	sp|Q86V48|LUZP1_HUMAN	LUZP1	Leucine zipper protein 1 OS=Homo sapiens OX=9606 GN=LUZP1 PE=1 SV=2	366	9	6.30768	7.96202	6.74493	6.80175	0.336026	-0.239331	0.0966944	0.0121018	0.108796
	sp|Q5VUB5|F1711_HUMAN	FAM171A1	Protein FAM171A1 OS=Homo sapiens OX=9606 GN=FAM171A1 PE=1 SV=1	6430	3	5.98628	7.55593	6.43852	10.3711	0.33595	-0.23088	0.10507	0.687769	0.792839
	sp|Q9NNW7|TRXR2_HUMAN	TXNRD2	Thioredoxin reductase 2, mitochondrial OS=Homo sapiens OX=9606 GN=TXNRD2 PE=1 SV=3	1488	6	5.28685	6.66454	6.1506	5.17037	0.334098	-0.115778	0.21832	-0.250458	-0.0321386
	sp|Q9H0U9|TSYL1_HUMAN	TSPYL1	Testis-specific Y-encoded-like protein 1 OS=Homo sapiens OX=9606 GN=TSPYL1 PE=1 SV=3	1235	2	6.71847	8.46155	6.73661	7.02015	0.332789	-0.328898	0.00389077	0.0594794	0.0633702
	sp|Q969Z0|FAKD4_HUMAN	TBRG4	FAST kinase domain-containing protein 4 OS=Homo sapiens OX=9606 GN=TBRG4 PE=1 SV=1	2705	8	1.41198	1.77809	1.63939	1.18853	0.332606	-0.117165	0.215441	-0.463982	-0.248541
	sp|Q8IUF8|RIOX2_HUMAN	RIOX2	Ribosomal oxygenase 2 OS=Homo sapiens OX=9606 GN=RIOX2 PE=1 SV=1	5210	2	6.45687	8.13093	7.13475	6.71406	0.332586	-0.188558	0.144028	-0.0876771	0.0563512
	sp|P07858|CATB_HUMAN	CTSB	Cathepsin B OS=Homo sapiens OX=9606 GN=CTSB PE=1 SV=3	3912	18	5.57401	7.01688	7.43858	6.64957	0.332114	0.0841972	0.416311	-0.161766	0.254545
	sp|P35221-2|CTNA1_HUMAN	CTNNA1	Isoform 2 of Catenin alpha-1 OS=Homo sapiens OX=9606 GN=CTNNA1	27	12	5.23156	6.58553	6.35349	6.05494	0.332057	-0.051751	0.280306	-0.0694371	0.210869
	tr|A0A3F2YP58|A0A3F2YP58_HUMAN	PDE10A	Phosphodiesterase OS=Homo sapiens OX=9606 GN=PDE10A PE=1 SV=1	5794	2	6.98455	8.78816	6.1185	6.01088	0.331395	-0.522383	-0.190988	-0.0256022	-0.21659
	sp|Q8TB37|NUBPL_HUMAN	NUBPL	Iron-sulfur protein NUBPL OS=Homo sapiens OX=9606 GN=NUBPL PE=1 SV=3	1633	5	5.15962	6.48818	6.8962	6.47473	0.330549	0.087987	0.418536	-0.0909805	0.327555
	sp|Q9H910-3|JUPI2_HUMAN	JPT2	Isoform 3 of Jupiter microtubule associated homolog 2 OS=Homo sapiens OX=9606 GN=JPT2	5774	2	6.5925	8.28989	6.03605	5.10399	0.330527	-0.457748	-0.127222	-0.241978	-0.3692
	sp|P35613|BASI_HUMAN	BSG	Basigin OS=Homo sapiens OX=9606 GN=BSG PE=1 SV=2	4536	4	5.72963	7.20363	5.64558	6.77774	0.330283	-0.351602	-0.0213193	0.263682	0.242363
	sp|Q92508|PIEZ1_HUMAN	PIEZO1	Piezo-type mechanosensitive ion channel component 1 OS=Homo sapiens OX=9606 GN=PIEZO1 PE=1 SV=4	2972	7	7.17158	9.01056	6.33023	6.73612	0.329325	-0.509359	-0.180033	0.0896603	-0.0903732
	sp|Q9BZX2|UCK2_HUMAN	UCK2	Uridine-cytidine kinase 2 OS=Homo sapiens OX=9606 GN=UCK2 PE=1 SV=1	5756	2	7.36539	9.25082	6.25882	6.29924	0.328819	-0.563691	-0.234872	0.00928901	-0.225583
	tr|A0A0A0MT35|A0A0A0MT35_HUMAN	PRXL2B	Prostamide/prostaglandin F synthase OS=Homo sapiens OX=9606 GN=PRXL2B PE=1 SV=1	6725	2	6.66613	8.37063	6.44861	8.09905	0.328486	-0.376347	-0.0478605	0.328763	0.280902
	sp|O75083|WDR1_HUMAN	WDR1	WD repeat-containing protein 1 OS=Homo sapiens OX=9606 GN=WDR1 PE=1 SV=4	1517	24	5.52172	6.92986	6.61879	6.64355	0.327708	-0.066258	0.26145	0.00538686	0.266837
	sp|P16070|CD44_HUMAN	CD44	CD44 antigen OS=Homo sapiens OX=9606 GN=CD44 PE=1 SV=3	2105	12	5.39009	6.75963	6.69847	10.2766	0.326635	-0.0131123	0.313523	0.617453	0.930975
	sp|Q9BVS5|TR61B_HUMAN	TRMT61B	tRNA (adenine(58)-N(1))-methyltransferase, mitochondrial OS=Homo sapiens OX=9606 GN=TRMT61B PE=1 SV=2	3931	6	5.36549	6.72747	5.51069	6.04821	0.326355	-0.287832	0.0385235	0.134276	0.172799
	sp|Q9H792|PEAK1_HUMAN	PEAK1	Inactive tyrosine-protein kinase PEAK1 OS=Homo sapiens OX=9606 GN=PEAK1 PE=1 SV=4	1025	6	5.53097	6.93093	5.80582	6.86514	0.325515	-0.255547	0.0699677	0.241787	0.311755
	sp|Q96QZ7|MAGI1_HUMAN	MAGI1	Membrane-associated guanylate kinase, WW and PDZ domain-containing protein 1 OS=Homo sapiens OX=9606 GN=MAGI1 PE=1 SV=3	4718	3	6.5112	8.1545	6.89664	7.31152	0.324672	-0.241702	0.0829695	0.0842777	0.167247
	sp|P06753-2|TPM3_HUMAN	TPM3	Isoform 2 of Tropomyosin alpha-3 chain OS=Homo sapiens OX=9606 GN=TPM3	837	12	5.97026	7.47243	6.53592	7.48479	0.323784	-0.193188	0.130595	0.195572	0.326167
	sp|Q96EN8|MOCOS_HUMAN	MOCOS	Molybdenum cofactor sulfurase OS=Homo sapiens OX=9606 GN=MOCOS PE=1 SV=2	2281	7	6.94627	8.69264	5.68349	8.95226	0.323555	-0.613017	-0.289461	0.655475	0.366013
	tr|A2A274|A2A274_HUMAN	ACO2	Aconitate hydratase, mitochondrial OS=Homo sapiens OX=9606 GN=ACO2 PE=1 SV=1	3452	20	5.71405	7.14976	7.2269	5.57149	0.323381	0.0154828	0.338864	-0.375314	-0.0364505
	sp|Q13480-2|GAB1_HUMAN	GAB1	Isoform 2 of GRB2-associated-binding protein 1 OS=Homo sapiens OX=9606 GN=GAB1	4667	3	5.73899	7.17999	6.28465	5.87587	0.323184	-0.19215	0.131035	-0.0970292	0.0340056
	sp|Q8NI08|NCOA7_HUMAN	NCOA7	Nuclear receptor coactivator 7 OS=Homo sapiens OX=9606 GN=NCOA7 PE=1 SV=2	3541	12	4.61164	5.76885	6.48925	6.41913	0.323006	0.169768	0.492773	-0.0156755	0.477098
	sp|Q15111|PLCL1_HUMAN	PLCL1	Inactive phospholipase C-like protein 1 OS=Homo sapiens OX=9606 GN=PLCL1 PE=1 SV=3	2429	2	5.5214	6.90343	8.31116	6.42927	0.322279	0.267737	0.590016	-0.370396	0.21962
	sp|Q9Y6M5|ZNT1_HUMAN	SLC30A1	Zinc transporter 1 OS=Homo sapiens OX=9606 GN=SLC30A1 PE=1 SV=3	1030	2	3.8594	4.82429	3.97218	4.2832	0.32194	-0.280385	0.0415557	0.108756	0.150312
	sp|Q96PY6-3|NEK1_HUMAN	NEK1	Isoform 3 of Serine/threonine-protein kinase Nek1 OS=Homo sapiens OX=9606 GN=NEK1	5143	5	5.90338	7.37721	7.4993	7.58122	0.321533	0.023681	0.345214	0.0156754	0.36089
	sp|Q9NPJ3|ACO13_HUMAN	ACOT13	Acyl-coenzyme A thioesterase 13 OS=Homo sapiens OX=9606 GN=ACOT13 PE=1 SV=1	5534	4	4.74276	5.92658	5.67216	6.11224	0.321472	-0.0633007	0.258171	0.107803	0.365974
	sp|Q9BUV8-5|RAB5I_HUMAN	RAB5IF	Isoform 5 of Uncharacterized protein RAB5IF OS=Homo sapiens OX=9606 GN=RAB5IF	4643	2	6.19634	7.74115	6.43277	5.46766	0.321132	-0.267109	0.0540235	-0.234517	-0.180493
	sp|P07741|APT_HUMAN	APRT	Adenine phosphoribosyltransferase OS=Homo sapiens OX=9606 GN=APRT PE=1 SV=2	993	2	3.0647	3.82794	3.2287	3.2426	0.320822	-0.245613	0.075209	0.00619396	0.081403
	sp|Q15119|PDK2_HUMAN	PDK2	[Pyruvate dehydrogenase (acetyl-transferring)] kinase isozyme 2, mitochondrial OS=Homo sapiens OX=9606 GN=PDK2 PE=1 SV=2	3574	7	5.69818	7.11485	7.09404	6.56529	0.320332	-0.00422723	0.316105	-0.111749	0.204356
	tr|A0A286YF11|A0A286YF11_HUMAN	MICU1	Calcium uptake protein 1, mitochondrial OS=Homo sapiens OX=9606 GN=MICU1 PE=1 SV=1	3130	6	5.90601	7.37279	6.41574	6.61216	0.320025	-0.200595	0.119431	0.0435063	0.162937
	sp|Q9GZN8-2|CT027_HUMAN	C20orf27	Isoform 2 of UPF0687 protein C20orf27 OS=Homo sapiens OX=9606 GN=C20orf27	4622	2	5.97623	7.45177	7.65678	6.88768	0.318347	0.0391543	0.357502	-0.152719	0.204782
	sp|Q9P0V3|SH3B4_HUMAN	SH3BP4	SH3 domain-binding protein 4 OS=Homo sapiens OX=9606 GN=SH3BP4 PE=1 SV=1	24	2	6.55924	8.17837	6.75773	7.62039	0.318285	-0.275276	0.043009	0.173327	0.216336
	sp|Q6P161|RM54_HUMAN	MRPL54	39S ribosomal protein L54, mitochondrial OS=Homo sapiens OX=9606 GN=MRPL54 PE=1 SV=1	4139	2	5.55616	6.92552	8.43139	5.9833	0.317834	0.283848	0.601682	-0.494827	0.106854
	sp|Q8IYB5|SMAP1_HUMAN	SMAP1	Stromal membrane-associated protein 1 OS=Homo sapiens OX=9606 GN=SMAP1 PE=1 SV=2	6363	3	3.81044	4.74916	4.28894	4.41169	0.317716	-0.147051	0.170665	0.0407097	0.211375
	sp|Q96RP9|EFGM_HUMAN	GFM1	Elongation factor G, mitochondrial OS=Homo sapiens OX=9606 GN=GFM1 PE=1 SV=2	1735	20	5.01068	6.23476	5.74186	4.49228	0.315328	-0.118815	0.196513	-0.354071	-0.157558
	sp|Q13948|CASP_HUMAN	CUX1	Protein CASP OS=Homo sapiens OX=9606 GN=CUX1 PE=1 SV=2	2343	2	7.02467	8.73919	6.55659	6.68444	0.315069	-0.414554	-0.0994851	0.0278614	-0.0716238
	tr|G3XAN8|G3XAN8_HUMAN	TIMM8B	Mitochondrial import inner membrane translocase subunit Tim8 B OS=Homo sapiens OX=9606 GN=TIMM8B PE=1 SV=1	5228	3	6.11093	7.601	6.72854	6.29196	0.314799	-0.175896	0.138902	-0.096784	0.0421183
	sp|Q00534|CDK6_HUMAN	CDK6	Cyclin-dependent kinase 6 OS=Homo sapiens OX=9606 GN=CDK6 PE=1 SV=1	3321	2	7.06712	8.78644	6.04019	8.0991	0.314156	-0.540686	-0.22653	0.423169	0.196639
	sp|Q03169|TNAP2_HUMAN	TNFAIP2	Tumor necrosis factor alpha-induced protein 2 OS=Homo sapiens OX=9606 GN=TNFAIP2 PE=2 SV=2	1082	5	5.16526	6.42128	5.60392	7.34699	0.314022	-0.196425	0.117597	0.390718	0.508314
	sp|Q96QD8|S38A2_HUMAN	SLC38A2	Sodium-coupled neutral amino acid transporter 2 OS=Homo sapiens OX=9606 GN=SLC38A2 PE=1 SV=2	5452	2	7.76768	9.65262	5.95847	5.99413	0.313437	-0.695979	-0.382543	0.00860925	-0.373933
	sp|Q9HAV7|GRPE1_HUMAN	GRPEL1	GrpE protein homolog 1, mitochondrial OS=Homo sapiens OX=9606 GN=GRPEL1 PE=1 SV=2	779	8	5.75339	7.14747	6.34691	5.53763	0.313021	-0.171377	0.141644	-0.196786	-0.0551428
	sp|Q13643|FHL3_HUMAN	FHL3	Four and a half LIM domains protein 3 OS=Homo sapiens OX=9606 GN=FHL3 PE=1 SV=4	3428	6	3.27228	4.06458	3.23769	3.3816	0.31281	-0.328143	-0.0153336	0.0627419	0.0474083
	sp|P16930|FAAA_HUMAN	FAH	Fumarylacetoacetase OS=Homo sapiens OX=9606 GN=FAH PE=1 SV=2	2698	10	5.88676	7.31076	6.22541	6.06675	0.312547	-0.231852	0.080695	-0.037245	0.0434501
	sp|P13051|UNG_HUMAN	UNG	Uracil-DNA glycosylase OS=Homo sapiens OX=9606 GN=UNG PE=1 SV=2	2323	4	5.06214	6.28564	7.33496	5.54745	0.312313	0.22273	0.535043	-0.402965	0.132078
	sp|Q71RC2-4|LARP4_HUMAN	LARP4	Isoform 4 of La-related protein 4 OS=Homo sapiens OX=9606 GN=LARP4	2700	6	6.11601	7.59353	6.27141	5.51042	0.312179	-0.27598	0.0361991	-0.186628	-0.150428
	sp|O14494|PLPP1_HUMAN	PLPP1	Phospholipid phosphatase 1 OS=Homo sapiens OX=9606 GN=PLPP1 PE=1 SV=1	5827	2	4.96423	6.15956	7.80152	6.24611	0.311257	0.340928	0.652185	-0.320796	0.331389
	sp|P13987-2|CD59_HUMAN	CD59	Isoform 2 of CD59 glycoprotein OS=Homo sapiens OX=9606 GN=CD59	1422	3	5.61293	6.959	5.64191	7.42184	0.310126	-0.302696	0.00742958	0.395593	0.403023
	sp|P11586|C1TC_HUMAN	MTHFD1	C-1-tetrahydrofolate synthase, cytoplasmic OS=Homo sapiens OX=9606 GN=MTHFD1 PE=1 SV=3	957	2	6.41474	7.95101	7.06813	7.247	0.309748	-0.16981	0.139938	0.0360553	0.175993
	sp|P32322-3|P5CR1_HUMAN	PYCR1	Isoform 3 of Pyrroline-5-carboxylate reductase 1, mitochondrial OS=Homo sapiens OX=9606 GN=PYCR1	4705	9	4.22218	5.23149	5.27062	4.50058	0.309232	0.0107503	0.319982	-0.22786	0.0921217
	sp|Q9ULF5|S39AA_HUMAN	SLC39A10	Zinc transporter ZIP10 OS=Homo sapiens OX=9606 GN=SLC39A10 PE=1 SV=2	6410	2	6.40342	7.93334	6.70983	8.36539	0.309086	-0.241652	0.0674339	0.318157	0.385591
	sp|P36776|LONM_HUMAN	LONP1	Lon protease homolog, mitochondrial OS=Homo sapiens OX=9606 GN=LONP1 PE=1 SV=2	1501	27	6.07282	7.51788	6.50984	6.67677	0.307958	-0.207702	0.100255	0.0365275	0.136783
	sp|Q9UNF0|PACN2_HUMAN	PACSIN2	Protein kinase C and casein kinase substrate in neurons protein 2 OS=Homo sapiens OX=9606 GN=PACSIN2 PE=1 SV=2	783	15	5.67952	7.0252	6.65636	5.87594	0.306771	-0.0778066	0.228965	-0.179913	0.0490515
	sp|Q9H2K8|TAOK3_HUMAN	TAOK3	Serine/threonine-protein kinase TAO3 OS=Homo sapiens OX=9606 GN=TAOK3 PE=1 SV=2	1014	7	6.11556	7.56433	6.07153	6.4184	0.306728	-0.317152	-0.0104233	0.0801535	0.0697302
	sp|Q8N0X4|CLYBL_HUMAN	CLYBL	Citramalyl-CoA lyase, mitochondrial OS=Homo sapiens OX=9606 GN=CLYBL PE=1 SV=2	2627	6	5.79818	7.16893	7.1377	6.97359	0.306158	-0.00630022	0.299857	-0.0335557	0.266302
	sp|Q92626|PXDN_HUMAN	PXDN	Peroxidasin homolog OS=Homo sapiens OX=9606 GN=PXDN PE=1 SV=2	1165	14	6.15137	7.60234	7.42212	5.97274	0.305536	-0.0346138	0.270923	-0.313439	-0.042516
	sp|Q9UH73|COE1_HUMAN	EBF1	Transcription factor COE1 OS=Homo sapiens OX=9606 GN=EBF1 PE=1 SV=2	105	6	5.61382	6.93495	6.63231	7.5687	0.304902	-0.0643726	0.240529	0.190533	0.431063
	sp|O15091|MRPP3_HUMAN	PRORP	Mitochondrial ribonuclease P catalytic subunit OS=Homo sapiens OX=9606 GN=PRORP PE=1 SV=2	1160	6	5.94316	7.33956	7.3514	6.40387	0.304463	0.00232381	0.306787	-0.199073	0.107714
	sp|Q92934|BAD_HUMAN	BAD	Bcl2-associated agonist of cell death OS=Homo sapiens OX=9606 GN=BAD PE=1 SV=3	5684	2	6.22227	7.68113	7.29713	7.2535	0.303879	-0.0739894	0.22989	-0.00865251	0.221237
	tr|A0A0A6YY92|A0A0A6YY92_HUMAN	ADSL	Adenylosuccinate lyase OS=Homo sapiens OX=9606 GN=ADSL PE=1 SV=1	1184	8	5.89039	7.27042	6.40983	6.68234	0.303675	-0.181752	0.121922	0.0600669	0.181989
	sp|P06241|FYN_HUMAN	FYN	Tyrosine-protein kinase Fyn OS=Homo sapiens OX=9606 GN=FYN PE=1 SV=3	228	5	5.62175	6.93515	6.39616	11.7763	0.302907	-0.116721	0.186186	0.880609	1.0668
	sp|Q15678|PTN14_HUMAN	PTPN14	Tyrosine-protein phosphatase non-receptor type 14 OS=Homo sapiens OX=9606 GN=PTPN14 PE=1 SV=2	1555	4	5.80027	7.15507	6.82291	7.32786	0.302846	-0.068579	0.234267	0.103004	0.337272
	sp|P49796|RGS3_HUMAN	RGS3	Regulator of G-protein signaling 3 OS=Homo sapiens OX=9606 GN=RGS3 PE=1 SV=2	4258	3	5.4109	6.66651	8.17242	7.36661	0.301063	0.293832	0.594895	-0.149762	0.445133
	sp|Q9NQ50|RM40_HUMAN	MRPL40	39S ribosomal protein L40, mitochondrial OS=Homo sapiens OX=9606 GN=MRPL40 PE=1 SV=1	2224	3	5.67066	6.98316	8.48714	5.55785	0.300363	0.281398	0.581761	-0.610751	-0.0289898
	sp|P10646|TFPI1_HUMAN	TFPI	Tissue factor pathway inhibitor OS=Homo sapiens OX=9606 GN=TFPI PE=1 SV=1	5278	4	8.5439	10.5206	5.0351	6.29797	0.300246	-1.06312	-0.762875	0.322867	-0.440008
	sp|O14867|BACH1_HUMAN	BACH1	Transcription regulator protein BACH1 OS=Homo sapiens OX=9606 GN=BACH1 PE=1 SV=2	3981	3	4.24768	5.23011	4.90604	4.54401	0.300165	-0.0922814	0.207884	-0.110591	0.0972925
	sp|O43795|MYO1B_HUMAN	MYO1B	Unconventional myosin-Ib OS=Homo sapiens OX=9606 GN=MYO1B PE=1 SV=3	255	23	6.30008	7.75622	6.68583	7.14274	0.299984	-0.214246	0.0857373	0.0953709	0.181108
	sp|O95340-2|PAPS2_HUMAN	PAPSS2	Isoform B of Bifunctional 3'-phosphoadenosine 5'-phosphosulfate synthase 2 OS=Homo sapiens OX=9606 GN=PAPSS2	843	7	6.00348	7.3899	5.27438	6.66493	0.299757	-0.486554	-0.186798	0.337588	0.15079
	sp|Q8NB49|AT11C_HUMAN	ATP11C	Phospholipid-transporting ATPase IG OS=Homo sapiens OX=9606 GN=ATP11C PE=1 SV=3	2464	10	6.10785	7.51639	7.45298	7.11828	0.299377	-0.0122229	0.287154	-0.066289	0.220865
	tr|A0A087WVP1|A0A087WVP1_HUMAN	FAT1	Protocadherin Fat 1 OS=Homo sapiens OX=9606 GN=FAT1 PE=1 SV=1	2233	16	7.06743	8.69608	6.93182	5.18209	0.29918	-0.327132	-0.0279522	-0.419699	-0.447652
	sp|P16083|NQO2_HUMAN	NQO2	Ribosyldihydronicotinamide dehydrogenase [quinone] OS=Homo sapiens OX=9606 GN=NQO2 PE=1 SV=5	3934	8	6.77295	8.33338	7.36035	5.25945	0.299117	-0.179127	0.11999	-0.484863	-0.364873
	sp|P24593|IBP5_HUMAN	IGFBP5	Insulin-like growth factor-binding protein 5 OS=Homo sapiens OX=9606 GN=IGFBP5 PE=1 SV=1	3034	3	5.43954	6.69247	8.36009	6.72172	0.299055	0.32098	0.620034	-0.314689	0.305346
	sp|Q9GZS1|RPA49_HUMAN	POLR1E	DNA-directed RNA polymerase I subunit RPA49 OS=Homo sapiens OX=9606 GN=POLR1E PE=1 SV=3	2950	4	6.94918	8.54736	6.41842	5.74531	0.298636	-0.413262	-0.114626	-0.159831	-0.274457
	sp|O60858-3|TRI13_HUMAN	TRIM13	Isoform 3 of E3 ubiquitin-protein ligase TRIM13 OS=Homo sapiens OX=9606 GN=TRIM13	5138	2	7.02817	8.63795	6.84055	5.97916	0.297539	-0.336576	-0.0390364	-0.19417	-0.233206
	sp|P30622-2|CLIP1_HUMAN	CLIP1	Isoform 3 of CAP-Gly domain-containing linker protein 1 OS=Homo sapiens OX=9606 GN=CLIP1	169	24	5.92556	7.28141	5.96621	7.30977	0.297265	-0.287402	0.00986244	0.29301	0.302873
	sp|P99999|CYC_HUMAN	CYCS	Cytochrome c OS=Homo sapiens OX=9606 GN=CYCS PE=1 SV=2	744	15	5.99945	7.37179	6.66617	5.67327	0.297184	-0.145155	0.152029	-0.23268	-0.080651
	sp|Q93052|LPP_HUMAN	LPP	Lipoma-preferred partner OS=Homo sapiens OX=9606 GN=LPP PE=1 SV=1	3068	17	5.67786	6.974	6.28057	6.69091	0.296639	-0.151091	0.145548	0.0913073	0.236855
	sp|O75460|ERN1_HUMAN	ERN1	Serine/threonine-protein kinase/endoribonuclease IRE1 OS=Homo sapiens OX=9606 GN=ERN1 PE=1 SV=2	2216	4	6.14575	7.54582	6.048	5.28676	0.29609	-0.319221	-0.0231314	-0.194072	-0.217203
	sp|Q7Z3T8|ZFY16_HUMAN	ZFYVE16	Zinc finger FYVE domain-containing protein 16 OS=Homo sapiens OX=9606 GN=ZFYVE16 PE=1 SV=3	3854	10	6.50113	7.98199	6.8575	6.51451	0.296059	-0.219066	0.0769926	-0.0740257	0.0029669
	sp|O95801|TTC4_HUMAN	TTC4	Tetratricopeptide repeat protein 4 OS=Homo sapiens OX=9606 GN=TTC4 PE=1 SV=3	59	5	5.82109	7.14676	6.57649	6.46396	0.296	-0.119972	0.176028	-0.0248995	0.151128
	sp|Q00796|DHSO_HUMAN	SORD	Sorbitol dehydrogenase OS=Homo sapiens OX=9606 GN=SORD PE=1 SV=4	1837	8	6.13911	7.53394	7.58536	4.91113	0.295374	0.00981375	0.305187	-0.627163	-0.321975
	sp|O15118|NPC1_HUMAN	NPC1	NPC intracellular cholesterol transporter 1 OS=Homo sapiens OX=9606 GN=NPC1 PE=1 SV=2	1265	10	6.24976	7.66925	6.78078	6.93342	0.295285	-0.177635	0.117651	0.0321156	0.149766
	sp|P15408|FOSL2_HUMAN	FOSL2	Fos-related antigen 2 OS=Homo sapiens OX=9606 GN=FOSL2 PE=1 SV=1	3692	5	6.39978	7.85248	5.91964	5.35569	0.295126	-0.407637	-0.112511	-0.144438	-0.256949
	sp|Q08426|ECHP_HUMAN	EHHADH	Peroxisomal bifunctional enzyme OS=Homo sapiens OX=9606 GN=EHHADH PE=1 SV=3	3325	4	6.86734	8.42548	7.15182	5.60529	0.295007	-0.236448	0.0585587	-0.351523	-0.292964
	sp|Q9UL01|DSE_HUMAN	DSE	Dermatan-sulfate epimerase OS=Homo sapiens OX=9606 GN=DSE PE=1 SV=1	4911	4	6.62787	8.12846	7.23368	6.16449	0.294437	-0.168254	0.126183	-0.230747	-0.104564
	sp|P34897|GLYM_HUMAN	SHMT2	Serine hydroxymethyltransferase, mitochondrial OS=Homo sapiens OX=9606 GN=SHMT2 PE=1 SV=3	298	17	5.92228	7.25994	6.47308	6.46043	0.293805	-0.165505	0.1283	-0.002824	0.125476
	sp|Q9H6F5|CCD86_HUMAN	CCDC86	Coiled-coil domain-containing protein 86 OS=Homo sapiens OX=9606 GN=CCDC86 PE=1 SV=1	1111	6	6.39271	7.83547	6.10852	6.43074	0.293592	-0.359197	-0.0656052	0.0741612	0.00855599
	sp|Q8NBM4|UBAC2_HUMAN	UBAC2	Ubiquitin-associated domain-containing protein 2 OS=Homo sapiens OX=9606 GN=UBAC2 PE=1 SV=1	2657	5	3.78653	4.64042	4.7294	4.36942	0.293379	0.0274013	0.32078	-0.114217	0.206564
	tr|A0A286YFF7|A0A286YFF7_HUMAN	PPT1	Palmitoyl-protein thioesterase 1 OS=Homo sapiens OX=9606 GN=PPT1 PE=1 SV=1	3359	5	6.21402	7.61439	7.04162	7.77549	0.293202	-0.11282	0.180382	0.143027	0.323408
	sp|Q9BQ70|TCF25_HUMAN	TCF25	Transcription factor 25 OS=Homo sapiens OX=9606 GN=TCF25 PE=1 SV=1	5273	3	6.59371	8.07924	7.06859	6.78479	0.293129	-0.192797	0.100332	-0.0591176	0.0412148
	sp|O60716|CTND1_HUMAN	CTNND1	Catenin delta-1 OS=Homo sapiens OX=9606 GN=CTNND1 PE=1 SV=1	47	14	4.93097	6.03976	5.76097	5.23462	0.29262	-0.0681811	0.224438	-0.138226	0.0862124
	sp|Q9Y3D6|FIS1_HUMAN	FIS1	Mitochondrial fission 1 protein OS=Homo sapiens OX=9606 GN=FIS1 PE=1 SV=2	244	2	5.93142	7.26196	7.39827	7.72531	0.291981	0.0268296	0.31881	0.0624033	0.381214
	sp|Q4L180|FIL1L_HUMAN	FILIP1L	Filamin A-interacting protein 1-like OS=Homo sapiens OX=9606 GN=FILIP1L PE=1 SV=2	896	4	7.88491	9.65334	5.19389	8.11092	0.291933	-0.894214	-0.60228	0.643052	0.0407716
	sp|O15446-2|RPA34_HUMAN	CD3EAP	Isoform 2 of DNA-directed RNA polymerase I subunit RPA34 OS=Homo sapiens OX=9606 GN=CD3EAP	5121	5	7.06568	8.64826	6.80816	6.00462	0.291581	-0.345146	-0.0535649	-0.181192	-0.234757
	sp|Q8NCG7|DGLB_HUMAN	DAGLB	Sn1-specific diacylglycerol lipase beta OS=Homo sapiens OX=9606 GN=DAGLB PE=1 SV=2	95	3	6.14599	7.52205	6.78988	6.39818	0.29148	-0.147739	0.143741	-0.0857263	0.058015
	sp|Q5VWZ2|LYPL1_HUMAN	LYPLAL1	Lysophospholipase-like protein 1 OS=Homo sapiens OX=9606 GN=LYPLAL1 PE=1 SV=3	2588	4	5.58551	6.83248	5.9191	6.58509	0.29072	-0.20703	0.0836896	0.153823	0.237513
	tr|I3L448|I3L448_HUMAN	ATPAF1	ATP synthase mitochondrial F1 complex assembly factor 1 OS=Homo sapiens OX=9606 GN=ATPAF1 PE=1 SV=1	1920	2	6.2426	7.63163	6.6905	5.73574	0.289844	-0.189877	0.0999678	-0.222134	-0.122167
	sp|Q6ZWL3|CP4V2_HUMAN	CYP4V2	Cytochrome P450 4V2 OS=Homo sapiens OX=9606 GN=CYP4V2 PE=1 SV=2	5296	2	6.40514	7.82999	8.01275	4.60908	0.289779	0.033287	0.323066	-0.797818	-0.474752
	tr|B4E0Y9|B4E0Y9_HUMAN	STK26	Serine/threonine-protein kinase 26 OS=Homo sapiens OX=9606 GN=STK26 PE=1 SV=1	378	2	2.64921	3.2375	3.10516	3.22301	0.289321	-0.0602141	0.229107	0.0537388	0.282846
	sp|P68366|TBA4A_HUMAN	TUBA4A	Tubulin alpha-4A chain OS=Homo sapiens OX=9606 GN=TUBA4A PE=1 SV=1	1276	10	6.12126	7.47896	6.68696	6.14457	0.289009	-0.161488	0.127521	-0.122037	0.00548341
	sp|Q9UG56|PISD_HUMAN	PISD	Phosphatidylserine decarboxylase proenzyme, mitochondrial OS=Homo sapiens OX=9606 GN=PISD PE=2 SV=4	5833	2	6.90299	8.42685	7.20402	5.39318	0.287772	-0.226191	0.0615804	-0.417665	-0.356085
	sp|Q08AE8-2|SPIR1_HUMAN	SPIRE1	Isoform 2 of Protein spire homolog 1 OS=Homo sapiens OX=9606 GN=SPIRE1	1833	5	5.92789	7.23399	6.22255	6.91869	0.287274	-0.217287	0.0699877	0.152993	0.222981
	sp|Q9BU61|NDUF3_HUMAN	NDUFAF3	NADH dehydrogenase [ubiquinone] 1 alpha subcomplex assembly factor 3 OS=Homo sapiens OX=9606 GN=NDUFAF3 PE=1 SV=1	4431	4	6.52081	7.95642	7.71243	5.14687	0.287068	-0.0449352	0.242133	-0.583488	-0.341355
	sp|Q9NTM9|CUTC_HUMAN	CUTC	Copper homeostasis protein cutC homolog OS=Homo sapiens OX=9606 GN=CUTC PE=1 SV=1	5952	2	6.32069	7.71175	6.95248	8.09389	0.286975	-0.149531	0.137445	0.219306	0.356751
	sp|Q8TBB5|KLDC4_HUMAN	KLHDC4	Kelch domain-containing protein 4 OS=Homo sapiens OX=9606 GN=KLHDC4 PE=1 SV=1	4074	2	6.99098	8.52673	6.49173	7.24826	0.286497	-0.393389	-0.106892	0.159033	0.052141
	sp|Q15113|PCOC1_HUMAN	PCOLCE	Procollagen C-endopeptidase enhancer 1 OS=Homo sapiens OX=9606 GN=PCOLCE PE=1 SV=2	2806	10	5.86324	7.1485	7.98302	5.27452	0.285942	0.159294	0.445236	-0.597895	-0.152659
	sp|Q8NFV4|ABHDB_HUMAN	ABHD11	Protein ABHD11 OS=Homo sapiens OX=9606 GN=ABHD11 PE=1 SV=1	1676	2	6.2357	7.60202	7.3801	7.10309	0.285831	-0.0427428	0.243088	-0.0551929	0.187895
	sp|Q6R327-3|RICTR_HUMAN	RICTOR	Isoform 3 of Rapamycin-insensitive companion of mTOR OS=Homo sapiens OX=9606 GN=RICTOR	2285	6	7.03035	8.5688	6.80834	6.17624	0.285496	-0.33179	-0.0462938	-0.140575	-0.186868
	sp|P18206|VINC_HUMAN	VCL	Vinculin OS=Homo sapiens OX=9606 GN=VCL PE=1 SV=4	77	31	5.86775	7.14513	6.72369	7.14149	0.284154	-0.0877084	0.196445	0.0869726	0.283418
	sp|Q6PKG0|LARP1_HUMAN	LARP1	La-related protein 1 OS=Homo sapiens OX=9606 GN=LARP1 PE=1 SV=2	3013	12	5.2791	6.42651	5.26731	4.83089	0.283742	-0.286968	-0.00322608	-0.124776	-0.128002
	sp|P14621|ACYP2_HUMAN	ACYP2	Acylphosphatase-2 OS=Homo sapiens OX=9606 GN=ACYP2 PE=1 SV=2	5822	4	6.19209	7.53781	7.51697	6.85424	0.28372	-0.0039945	0.279726	-0.133155	0.146571
	sp|Q96K49|TM87B_HUMAN	TMEM87B	Transmembrane protein 87B OS=Homo sapiens OX=9606 GN=TMEM87B PE=1 SV=1	6418	2	5.78679	7.04254	5.66454	6.98427	0.283332	-0.314138	-0.0308053	0.302151	0.271345
	sp|Q8N5N7|RM50_HUMAN	MRPL50	39S ribosomal protein L50, mitochondrial OS=Homo sapiens OX=9606 GN=MRPL50 PE=1 SV=2	3107	5	5.34142	6.49897	7.23576	4.73693	0.282988	0.154932	0.43792	-0.611193	-0.173272
	sp|P50583|AP4A_HUMAN	NUDT2	Bis(5'-nucleosyl)-tetraphosphatase [asymmetrical] OS=Homo sapiens OX=9606 GN=NUDT2 PE=1 SV=3	595	4	6.75218	8.21383	6.33124	6.631	0.282702	-0.375566	-0.0928645	0.0667365	-0.026128
	sp|Q8WUK0|PTPM1_HUMAN	PTPMT1	Phosphatidylglycerophosphatase and protein-tyrosine phosphatase 1 OS=Homo sapiens OX=9606 GN=PTPMT1 PE=1 SV=1	3831	4	6.6605	8.09745	7.38468	5.70899	0.281836	-0.132932	0.148905	-0.371299	-0.222394
	tr|A0A087X2G6|A0A087X2G6_HUMAN	NOP16	Nucleolar protein 16 OS=Homo sapiens OX=9606 GN=NOP16 PE=1 SV=1	2199	3	5.76518	7.00842	5.7432	5.54666	0.281723	-0.287236	-0.0055121	-0.0502351	-0.0557472
	sp|Q9UQ80|PA2G4_HUMAN	PA2G4	Proliferation-associated protein 2G4 OS=Homo sapiens OX=9606 GN=PA2G4 PE=1 SV=3	256	15	4.63907	5.63787	4.92728	4.96121	0.281315	-0.19436	0.0869558	0.00990057	0.0968564
	sp|Q96S97|MYADM_HUMAN	MYADM	Myeloid-associated differentiation marker OS=Homo sapiens OX=9606 GN=MYADM PE=1 SV=2	2567	6	6.01441	7.30752	6.8123	6.53936	0.280959	-0.101241	0.179717	-0.0589918	0.120725
	sp|Q5TF39|MFS4B_HUMAN	MFSD4B	Sodium-dependent glucose transporter 1 OS=Homo sapiens OX=9606 GN=MFSD4B PE=2 SV=1	2004	2	5.80745	7.05358	7.45341	8.34824	0.280452	0.079544	0.359996	0.163572	0.523568
	sp|Q6ZRP7|QSOX2_HUMAN	QSOX2	Sulfhydryl oxidase 2 OS=Homo sapiens OX=9606 GN=QSOX2 PE=1 SV=3	1166	5	6.82007	8.28004	7.19792	5.75609	0.279851	-0.202058	0.0777929	-0.322492	-0.244699
	tr|A6NMN0|A6NMN0_HUMAN	PHKA1	Phosphorylase b kinase regulatory subunit OS=Homo sapiens OX=9606 GN=PHKA1 PE=1 SV=1	2153	4	5.37286	6.52257	7.89528	6.76874	0.27975	0.27555	0.5553	-0.222104	0.333196
	sp|Q9NS00|C1GLT_HUMAN	C1GALT1	Glycoprotein-N-acetylgalactosamine 3-beta-galactosyltransferase 1 OS=Homo sapiens OX=9606 GN=C1GALT1 PE=1 SV=1	4820	2	6.86501	8.33275	6.81365	6.76239	0.27953	-0.290365	-0.0108343	-0.0108939	-0.0217282
	sp|P04920|B3A2_HUMAN	SLC4A2	Anion exchange protein 2 OS=Homo sapiens OX=9606 GN=SLC4A2 PE=1 SV=4	1996	4	6.94486	8.42712	6.89905	6.24486	0.279095	-0.288642	-0.00954685	-0.143729	-0.153276
	sp|P04080|CYTB_HUMAN	CSTB	Cystatin-B OS=Homo sapiens OX=9606 GN=CSTB PE=1 SV=2	1747	5	5.39478	6.54064	6.17337	5.76004	0.277868	-0.083372	0.194496	-0.099979	0.0945168
	sp|Q8IYU8|MICU2_HUMAN	MICU2	Calcium uptake protein 2, mitochondrial OS=Homo sapiens OX=9606 GN=MICU2 PE=1 SV=2	5714	3	5.32735	6.45649	5.859	5.91296	0.277331	-0.140096	0.137235	0.0132281	0.150463
	sp|Q6UXV4|MIC27_HUMAN	APOOL	MICOS complex subunit MIC27 OS=Homo sapiens OX=9606 GN=APOOL PE=1 SV=1	3578	14	5.7461	6.96258	6.74216	7.35816	0.277039	-0.0464112	0.230628	0.126136	0.356764
	sp|Q7Z4H3|HDDC2_HUMAN	HDDC2	HD domain-containing protein 2 OS=Homo sapiens OX=9606 GN=HDDC2 PE=1 SV=1	4931	6	6.38002	7.72986	6.48621	7.8348	0.276881	-0.253067	0.0238144	0.27252	0.296335
	sp|O15061|SYNEM_HUMAN	SYNM	Synemin OS=Homo sapiens OX=9606 GN=SYNM PE=1 SV=2	4795	4	2.13872	2.59026	6.10123	3.44867	0.276347	1.236	1.51235	-0.823059	0.68929
	tr|E7EX59|E7EX59_HUMAN	PCCB	Propionyl-CoA carboxylase beta chain, mitochondrial OS=Homo sapiens OX=9606 GN=PCCB PE=1 SV=1	1153	16	5.79675	7.01079	7.15649	6.39655	0.274333	0.0296748	0.304008	-0.161958	0.14205
	sp|Q99757|THIOM_HUMAN	TXN2	Thioredoxin, mitochondrial OS=Homo sapiens OX=9606 GN=TXN2 PE=1 SV=2	3670	2	5.60615	6.77755	6.45511	5.68127	0.273754	-0.0703222	0.203431	-0.184227	0.0192044
	tr|C9JLB7|C9JLB7_HUMAN	OXNAD1	Oxidoreductase NAD-binding domain-containing protein 1 OS=Homo sapiens OX=9606 GN=OXNAD1 PE=1 SV=2	6360	4	5.61698	6.7904	7.32786	6.29042	0.273702	0.109896	0.383598	-0.220236	0.163362
	sp|O76003|GLRX3_HUMAN	GLRX3	Glutaredoxin-3 OS=Homo sapiens OX=9606 GN=GLRX3 PE=1 SV=2	4856	6	5.68615	6.87385	6.23594	6.56048	0.273666	-0.14051	0.133155	0.0731928	0.206348
	sp|O00391|QSOX1_HUMAN	QSOX1	Sulfhydryl oxidase 1 OS=Homo sapiens OX=9606 GN=QSOX1 PE=1 SV=3	4432	3	7.54031	9.11447	6.1577	6.54473	0.273535	-0.565766	-0.292231	0.087942	-0.204289
	sp|P10620|MGST1_HUMAN	MGST1	Microsomal glutathione S-transferase 1 OS=Homo sapiens OX=9606 GN=MGST1 PE=1 SV=1	6139	5	7.26744	8.78286	6.90549	5.19473	0.273244	-0.346947	-0.0737035	-0.410695	-0.484398
	sp|P62633-6|CNBP_HUMAN	CNBP	Isoform 6 of Cellular nucleic acid-binding protein OS=Homo sapiens OX=9606 GN=CNBP	3217	3	6.48984	7.84073	7.19459	6.92036	0.272805	-0.124076	0.148729	-0.0560654	0.0926634
	sp|Q9NZM1|MYOF_HUMAN	MYOF	Myoferlin OS=Homo sapiens OX=9606 GN=MYOF PE=1 SV=1	455	30	5.79908	7.00206	6.45675	7.85896	0.271957	-0.116971	0.154986	0.28353	0.438516
	sp|Q8TDN4|CABL1_HUMAN	CABLES1	CDK5 and ABL1 enzyme substrate 1 OS=Homo sapiens OX=9606 GN=CABLES1 PE=1 SV=2	5455	2	6.67751	8.06179	6.85648	7.32163	0.271789	-0.233633	0.0381568	0.0946978	0.132855
	tr|V9GYM8|V9GYM8_HUMAN	ARHGEF2	Rho guanine nucleotide exchange factor 2 OS=Homo sapiens OX=9606 GN=ARHGEF2 PE=1 SV=1	1296	15	6.5332	7.88692	5.88965	7.82128	0.271671	-0.42128	-0.149609	0.409224	0.259615
	sp|O95297|MPZL1_HUMAN	MPZL1	Myelin protein zero-like protein 1 OS=Homo sapiens OX=9606 GN=MPZL1 PE=1 SV=1	4414	3	6.44312	7.77731	6.0497	6.94673	0.271512	-0.362407	-0.0908947	0.19947	0.108575
	sp|O95466-2|FMNL1_HUMAN	FMNL1	Isoform 2 of Formin-like protein 1 OS=Homo sapiens OX=9606 GN=FMNL1	2305	7	7.85499	9.48096	5.33847	7.98069	0.271424	-0.828607	-0.557183	0.580088	0.0229056
	sp|Q9HAV0|GBB4_HUMAN	GNB4	Guanine nucleotide-binding protein subunit beta-4 OS=Homo sapiens OX=9606 GN=GNB4 PE=1 SV=3	565	5	5.85715	7.069	6.86435	10.0178	0.271306	-0.0423827	0.228923	0.545365	0.774288
	sp|P50452|SPB8_HUMAN	SERPINB8	Serpin B8 OS=Homo sapiens OX=9606 GN=SERPINB8 PE=1 SV=2	695	2	6.49733	7.8405	7.21719	6.84168	0.271098	-0.119508	0.15159	-0.0770877	0.0745019
	sp|Q01970|PLCB3_HUMAN	PLCB3	1-phosphatidylinositol 4,5-bisphosphate phosphodiesterase beta-3 OS=Homo sapiens OX=9606 GN=PLCB3 PE=1 SV=2	4444	13	5.73001	6.91335	6.21823	5.97728	0.270846	-0.152881	0.117965	-0.0570145	0.0609506
	sp|P19367-3|HXK1_HUMAN	HK1	Isoform 3 of Hexokinase-1 OS=Homo sapiens OX=9606 GN=HK1	414	28	5.56867	6.71694	6.26431	7.30539	0.270472	-0.100649	0.169823	0.221805	0.391628
	tr|J3KNA0|J3KNA0_HUMAN	OXA1L	Mitochondrial inner membrane protein OXA1L OS=Homo sapiens OX=9606 GN=OXA1L PE=1 SV=1	2682	3	6.06833	7.31951	7.31596	5.28135	0.270447	-0.000700213	0.269747	-0.470139	-0.200392
	sp|Q2LD37|K1109_HUMAN	KIAA1109	Transmembrane protein KIAA1109 OS=Homo sapiens OX=9606 GN=KIAA1109 PE=1 SV=2	2757	3	6.13659	7.40124	7.5721	6.97696	0.270331	0.0329258	0.303257	-0.118094	0.185163
	sp|Q9GZT9|EGLN1_HUMAN	EGLN1	Egl nine homolog 1 OS=Homo sapiens OX=9606 GN=EGLN1 PE=1 SV=1	29	4	6.65297	8.02174	6.50101	6.96031	0.269916	-0.303251	-0.0333354	0.0984877	0.0651523
	sp|Q99447-3|PCY2_HUMAN	PCYT2	Isoform 3 of Ethanolamine-phosphate cytidylyltransferase OS=Homo sapiens OX=9606 GN=PCYT2	1533	10	5.65772	6.82023	7.07146	6.08263	0.2696	0.0521887	0.321788	-0.217313	0.104476
	sp|Q9NUQ2|PLCE_HUMAN	AGPAT5	1-acyl-sn-glycerol-3-phosphate acyltransferase epsilon OS=Homo sapiens OX=9606 GN=AGPAT5 PE=1 SV=3	5098	5	6.57068	7.91857	7.52896	5.67924	0.269197	-0.0727896	0.196408	-0.406751	-0.210344
	sp|Q96B36-3|AKTS1_HUMAN	AKT1S1	Isoform 3 of Proline-rich AKT1 substrate 1 OS=Homo sapiens OX=9606 GN=AKT1S1	4442	2	6.34533	7.64559	6.83153	6.35066	0.268933	-0.162419	0.106515	-0.105303	0.0012121
	sp|P23229-6|ITA6_HUMAN	ITGA6	Isoform Alpha-6X1X2A of Integrin alpha-6 OS=Homo sapiens OX=9606 GN=ITGA6	961	7	4.84273	5.83463	7.08031	11.2946	0.268822	0.279172	0.547994	0.673753	1.22175
	sp|O94955|RHBT3_HUMAN	RHOBTB3	Rho-related BTB domain-containing protein 3 OS=Homo sapiens OX=9606 GN=RHOBTB3 PE=1 SV=2	4233	2	6.76786	8.15397	6.69708	7.52602	0.268803	-0.28397	-0.0151668	0.168354	0.153187
	sp|Q9NZ08-2|ERAP1_HUMAN	ERAP1	Isoform 2 of Endoplasmic reticulum aminopeptidase 1 OS=Homo sapiens OX=9606 GN=ERAP1	3480	12	7.20106	8.67341	5.88572	7.20649	0.268389	-0.559381	-0.290992	0.292079	0.00108679
	sp|P14174|MIF_HUMAN	MIF	Macrophage migration inhibitory factor OS=Homo sapiens OX=9606 GN=MIF PE=1 SV=4	5980	6	6.04559	7.28144	8.24287	5.28083	0.268341	0.178923	0.447264	-0.642383	-0.195119
	sp|Q15526|SURF1_HUMAN	SURF1	Surfeit locus protein 1 OS=Homo sapiens OX=9606 GN=SURF1 PE=1 SV=1	3971	5	6.23979	7.51429	6.6687	5.5527	0.268141	-0.172232	0.0959092	-0.264216	-0.168307
	sp|Q9H9J2|RM44_HUMAN	MRPL44	39S ribosomal protein L44, mitochondrial OS=Homo sapiens OX=9606 GN=MRPL44 PE=1 SV=1	4505	6	5.76273	6.9376	7.77292	5.06148	0.267683	0.16402	0.431703	-0.618897	-0.187194
	sp|Q9H3K2|GHITM_HUMAN	GHITM	Growth hormone-inducible transmembrane protein OS=Homo sapiens OX=9606 GN=GHITM PE=1 SV=2	1107	8	5.69865	6.8592	6.08307	6.05499	0.267419	-0.173241	0.0941786	-0.00667543	0.0875032
	tr|E9PGC8|E9PGC8_HUMAN	MAP1A	Microtubule-associated protein 1A OS=Homo sapiens OX=9606 GN=MAP1A PE=1 SV=1	127	29	5.82811	7.01396	6.76222	7.29266	0.267203	-0.0527333	0.214469	0.108949	0.323418
	sp|P61599|NAA20_HUMAN	NAA20	N-alpha-acetyltransferase 20 OS=Homo sapiens OX=9606 GN=NAA20 PE=1 SV=1	1258	4	3.52299	4.23805	3.8445	3.62806	0.2666	-0.140603	0.125997	-0.0835977	0.0423993
	sp|Q8N3C7|CLIP4_HUMAN	CLIP4	CAP-Gly domain-containing linker protein 4 OS=Homo sapiens OX=9606 GN=CLIP4 PE=1 SV=1	537	2	6.85786	8.24838	7.13141	5.94641	0.266353	-0.209925	0.0564282	-0.262168	-0.20574
	sp|O75116|ROCK2_HUMAN	ROCK2	Rho-associated protein kinase 2 OS=Homo sapiens OX=9606 GN=ROCK2 PE=1 SV=4	885	22	5.75489	6.92029	6.89006	6.99374	0.266044	-0.00631699	0.259727	0.021548	0.281275
	sp|Q9NSC5|HOME3_HUMAN	HOMER3	Homer protein homolog 3 OS=Homo sapiens OX=9606 GN=HOMER3 PE=1 SV=2	4476	4	6.18495	7.43623	7.05528	6.59366	0.265809	-0.0758691	0.18994	-0.0976217	0.0923179
	sp|Q02252|MMSA_HUMAN	ALDH6A1	Methylmalonate-semialdehyde dehydrogenase [acylating], mitochondrial OS=Homo sapiens OX=9606 GN=ALDH6A1 PE=1 SV=2	1013	13	5.1238	6.16029	7.53491	7.59084	0.265785	0.290592	0.556377	0.0106693	0.567046
	sp|P14384|CBPM_HUMAN	CPM	Carboxypeptidase M OS=Homo sapiens OX=9606 GN=CPM PE=1 SV=2	2637	7	3.025	3.63604	11.4482	5.6638	0.265433	1.65468	1.92012	-1.01528	0.904835
	sp|Q13740|CD166_HUMAN	ALCAM	CD166 antigen OS=Homo sapiens OX=9606 GN=ALCAM PE=1 SV=2	1891	5	5.39626	6.47804	5.41296	5.88162	0.263598	-0.259139	0.00445965	0.119796	0.124256
	sp|Q5EBL4|RIPL1_HUMAN	RILPL1	RILP-like protein 1 OS=Homo sapiens OX=9606 GN=RILPL1 PE=1 SV=1	3628	5	6.11495	7.33986	7.1683	6.16661	0.26341	-0.0341215	0.229289	-0.217154	0.0121349
	sp|P04075-2|ALDOA_HUMAN	ALDOA	Isoform 2 of Fructose-bisphosphate aldolase A OS=Homo sapiens OX=9606 GN=ALDOA	406	24	4.3018	5.16183	5.02401	3.80952	0.262942	-0.0390447	0.223897	-0.399228	-0.17533
	sp|O43592|XPOT_HUMAN	XPOT	Exportin-T OS=Homo sapiens OX=9606 GN=XPOT PE=1 SV=2	1802	14	6.02315	7.22696	6.42209	7.43296	0.262869	-0.170345	0.0925239	0.210894	0.303418
	tr|A0A3B3ITT5|A0A3B3ITT5_HUMAN	RPL29	60S ribosomal protein L29 OS=Homo sapiens OX=9606 GN=RPL29 PE=1 SV=1	2448	5	6.61519	7.93638	6.5947	6.40579	0.262698	-0.267173	-0.00447556	-0.0419313	-0.0464068
	sp|Q8WTV0-2|SCRB1_HUMAN	SCARB1	Isoform 1 of Scavenger receptor class B member 1 OS=Homo sapiens OX=9606 GN=SCARB1	4150	5	6.93562	8.31967	6.62953	5.15442	0.262502	-0.327621	-0.0651187	-0.363094	-0.428213
	tr|M0R0P8|M0R0P8_HUMAN	MYO9B	Unconventional myosin-IXb OS=Homo sapiens OX=9606 GN=MYO9B PE=1 SV=1	233	15	5.88316	7.05382	6.89967	6.33276	0.261814	-0.0318777	0.229937	-0.123694	0.106243
	sp|P98082|DAB2_HUMAN	DAB2	Disabled homolog 2 OS=Homo sapiens OX=9606 GN=DAB2 PE=1 SV=3	1176	15	6.20743	7.44111	5.89018	7.19956	0.261521	-0.337206	-0.0756848	0.289598	0.213914
	tr|E9PK25|E9PK25_HUMAN	CFL1	Cofilin-1 OS=Homo sapiens OX=9606 GN=CFL1 PE=1 SV=1	2918	14	5.4462	6.52824	6.2088	6.78095	0.261445	-0.0723811	0.189064	0.127173	0.316236
	sp|Q8IWB9-2|TEX2_HUMAN	TEX2	Isoform 2 of Testis-expressed protein 2 OS=Homo sapiens OX=9606 GN=TEX2	2723	11	6.25746	7.49166	6.83536	6.59984	0.259708	-0.132269	0.127439	-0.0505863	0.0768531
	sp|Q13045|FLII_HUMAN	FLII	Protein flightless-1 homolog OS=Homo sapiens OX=9606 GN=FLII PE=1 SV=2	633	17	6.69768	8.01739	6.5654	6.12308	0.259471	-0.288251	-0.02878	-0.100623	-0.129403
	sp|P43897|EFTS_HUMAN	TSFM	Elongation factor Ts, mitochondrial OS=Homo sapiens OX=9606 GN=TSFM PE=1 SV=2	1877	9	6.22807	7.45095	6.68845	6.00108	0.258641	-0.155754	0.102887	-0.156448	-0.053561
	sp|P17275|JUNB_HUMAN	JUNB	Transcription factor jun-B OS=Homo sapiens OX=9606 GN=JUNB PE=1 SV=1	1024	3	6.10549	7.30389	4.81412	4.46084	0.258557	-0.601392	-0.342835	-0.109956	-0.452791
	sp|Q9BYD6|RM01_HUMAN	MRPL1	39S ribosomal protein L1, mitochondrial OS=Homo sapiens OX=9606 GN=MRPL1 PE=1 SV=2	5433	5	5.57398	6.6643	7.18302	5.46902	0.257746	0.108138	0.365883	-0.39331	-0.0274268
	sp|Q9BX68|HINT2_HUMAN	HINT2	Histidine triad nucleotide-binding protein 2, mitochondrial OS=Homo sapiens OX=9606 GN=HINT2 PE=1 SV=1	940	4	6.07158	7.25878	6.58986	6.7965	0.257656	-0.139479	0.118177	0.0445431	0.16272
	tr|G0XQ39|G0XQ39_HUMAN	STIM1	STIM1L OS=Homo sapiens OX=9606 GN=STIM1 PE=1 SV=1	99	7	6.80329	8.13269	7.20234	5.98901	0.257501	-0.175267	0.0822345	-0.26615	-0.183916
	sp|P14618|KPYM_HUMAN	PKM	Pyruvate kinase PKM OS=Homo sapiens OX=9606 GN=PKM PE=1 SV=4	947	4	5.54322	6.62637	6.86351	5.75524	0.257494	0.0507267	0.308221	-0.254071	0.0541497
	sp|Q96G01|BICD1_HUMAN	BICD1	Protein bicaudal D homolog 1 OS=Homo sapiens OX=9606 GN=BICD1 PE=1 SV=3	4486	2	6.84798	8.18368	6.7064	7.33331	0.257072	-0.287212	-0.0301403	0.128927	0.098787
	sp|Q9UNE7|CHIP_HUMAN	STUB1	E3 ubiquitin-protein ligase CHIP OS=Homo sapiens OX=9606 GN=STUB1 PE=1 SV=2	1858	7	6.29611	7.52313	6.7459	7.39499	0.256873	-0.157321	0.0995517	0.132536	0.232087
	sp|Q9BSH4|TACO1_HUMAN	TACO1	Translational activator of cytochrome c oxidase 1 OS=Homo sapiens OX=9606 GN=TACO1 PE=1 SV=1	1866	10	5.63565	6.73387	6.51689	6.19658	0.256855	-0.0472533	0.209601	-0.0727111	0.13689
	sp|Q9Y237-2|PIN4_HUMAN	PIN4	Isoform 2 of Peptidyl-prolyl cis-trans isomerase NIMA-interacting 4 OS=Homo sapiens OX=9606 GN=PIN4	5324	6	6.02511	7.19758	6.9557	7.9139	0.256526	-0.0493169	0.207209	0.186194	0.393403
	sp|Q17R31-3|TATD3_HUMAN	TATDN3	Isoform 3 of Putative deoxyribonuclease TATDN3 OS=Homo sapiens OX=9606 GN=TATDN3	1507	2	2.01903	2.41187	2.28687	2.37635	0.25649	-0.0767799	0.17971	0.055372	0.235082
	sp|Q7L5Y1|ENOF1_HUMAN	ENOSF1	Mitochondrial enolase superfamily member 1 OS=Homo sapiens OX=9606 GN=ENOSF1 PE=1 SV=1	2069	10	5.80071	6.92864	7.88037	4.95554	0.256342	0.185691	0.442033	-0.66922	-0.227187
	sp|Q9Y3B7|RM11_HUMAN	MRPL11	39S ribosomal protein L11, mitochondrial OS=Homo sapiens OX=9606 GN=MRPL11 PE=1 SV=1	1405	6	5.31329	6.34591	7.30197	5.03233	0.256223	0.202458	0.458681	-0.537061	-0.0783795
	sp|Q15075|EEA1_HUMAN	EEA1	Early endosome antigen 1 OS=Homo sapiens OX=9606 GN=EEA1 PE=1 SV=2	514	25	5.81858	6.94903	6.51151	7.58299	0.256145	-0.0938195	0.162325	0.219775	0.382101
	sp|Q9Y5P4-3|C43BP_HUMAN	COL4A3BP	Isoform 3 of Collagen type IV alpha-3-binding protein OS=Homo sapiens OX=9606 GN=COL4A3BP	2926	7	6.41655	7.66317	6.47186	5.58911	0.256143	-0.243761	0.0123815	-0.211561	-0.199179
	tr|E7ETU7|E7ETU7_HUMAN	MRPL3	39S ribosomal protein L3, mitochondrial OS=Homo sapiens OX=9606 GN=MRPL3 PE=1 SV=1	2807	10	5.6378	6.73221	8.29097	5.26667	0.255949	0.30046	0.556409	-0.654648	-0.0982399
	sp|O43909|EXTL3_HUMAN	EXTL3	Exostosin-like 3 OS=Homo sapiens OX=9606 GN=EXTL3 PE=1 SV=1	5114	8	6.5642	7.83827	7.20634	6.77728	0.255915	-0.121268	0.134647	-0.0885617	0.0460854
	sp|O00411|RPOM_HUMAN	POLRMT	DNA-directed RNA polymerase, mitochondrial OS=Homo sapiens OX=9606 GN=POLRMT PE=1 SV=2	1962	4	7.02794	8.39166	5.78901	6.55392	0.255855	-0.53564	-0.279785	0.179042	-0.100743
	sp|P08559-4|ODPA_HUMAN	PDHA1	Isoform 4 of Pyruvate dehydrogenase E1 component subunit alpha, somatic form, mitochondrial OS=Homo sapiens OX=9606 GN=PDHA1	65	20	5.95278	7.10575	6.94338	5.58088	0.255424	-0.0333485	0.222076	-0.315146	-0.0930701
	sp|Q92636-2|FAN_HUMAN	NSMAF	Isoform 2 of Protein FAN OS=Homo sapiens OX=9606 GN=NSMAF	6487	2	6.14207	7.33099	6.78701	6.99357	0.255283	-0.111232	0.144052	0.0432543	0.187306
	sp|Q6UWE0|LRSM1_HUMAN	LRSAM1	E3 ubiquitin-protein ligase LRSAM1 OS=Homo sapiens OX=9606 GN=LRSAM1 PE=1 SV=1	178	11	6.42778	7.67197	7.21052	6.34582	0.255276	-0.0894948	0.165781	-0.184296	-0.0185147
	tr|G3V2S9|G3V2S9_HUMAN	SLIRP	SRA stem-loop-interacting RNA-binding protein, mitochondrial OS=Homo sapiens OX=9606 GN=SLIRP PE=1 SV=1	4758	4	6.15503	7.3398	7.28878	5.6769	0.253975	-0.0100624	0.243912	-0.360576	-0.116664
	sp|P49069|CAMLG_HUMAN	CAMLG	Calcium signal-modulating cyclophilin ligand OS=Homo sapiens OX=9606 GN=CAMLG PE=1 SV=1	5565	2	6.16464	7.3497	6.67542	4.38441	0.253669	-0.138827	0.114842	-0.606476	-0.491633
	sp|Q9BX95|SGPP1_HUMAN	SGPP1	Sphingosine-1-phosphate phosphatase 1 OS=Homo sapiens OX=9606 GN=SGPP1 PE=1 SV=2	5972	4	6.78877	8.09073	7.01738	6.62859	0.25312	-0.205337	0.0477833	-0.0822315	-0.0344482
	sp|Q9NVH6-8|TMLH_HUMAN	TMLHE	Isoform 8 of Trimethyllysine dioxygenase, mitochondrial OS=Homo sapiens OX=9606 GN=TMLHE	2346	7	5.20266	6.19943	6.70551	5.2904	0.252885	0.113212	0.366097	-0.34197	0.0241278
	sp|Q9P2B4|CT2NL_HUMAN	CTTNBP2NL	CTTNBP2 N-terminal-like protein OS=Homo sapiens OX=9606 GN=CTTNBP2NL PE=1 SV=2	139	6	6.15125	7.3295	6.86779	6.05668	0.252836	-0.0938699	0.158966	-0.18132	-0.0223536
	sp|Q86YH6|DLP1_HUMAN	PDSS2	Decaprenyl-diphosphate synthase subunit 2 OS=Homo sapiens OX=9606 GN=PDSS2 PE=1 SV=2	5711	4	5.83351	6.94855	8.19446	6.24352	0.252347	0.237937	0.490284	-0.39229	0.0979943
	sp|Q9BYC8|RM32_HUMAN	MRPL32	39S ribosomal protein L32, mitochondrial OS=Homo sapiens OX=9606 GN=MRPL32 PE=1 SV=1	2433	4	5.852	6.97016	8.4371	5.45543	0.252261	0.275557	0.527818	-0.629054	-0.101236
	sp|Q6ZW31|SYDE1_HUMAN	SYDE1	Rho GTPase-activating protein SYDE1 OS=Homo sapiens OX=9606 GN=SYDE1 PE=1 SV=1	6213	3	3.39006	4.03584	3.50106	3.93678	0.251559	-0.205077	0.0464824	0.169223	0.215705
	sp|Q00536-2|CDK16_HUMAN	CDK16	Isoform 2 of Cyclin-dependent kinase 16 OS=Homo sapiens OX=9606 GN=CDK16	5744	3	6.47601	7.7091	7.19452	7.13877	0.251457	-0.0996646	0.151792	-0.0112239	0.140569
	sp|Q9NP58|ABCB6_HUMAN	ABCB6	ATP-binding cassette sub-family B member 6, mitochondrial OS=Homo sapiens OX=9606 GN=ABCB6 PE=1 SV=1	2042	6	5.5135	6.56275	7.83749	8.37314	0.251332	0.256092	0.507424	0.095377	0.602801
	sp|P61224|RAP1B_HUMAN	RAP1B	Ras-related protein Rap-1b OS=Homo sapiens OX=9606 GN=RAP1B PE=1 SV=1	4281	6	6.04239	7.1918	6.95408	6.71588	0.251232	-0.0484933	0.202739	-0.0502836	0.152455
	sp|Q96CU9|FXRD1_HUMAN	FOXRED1	FAD-dependent oxidoreductase domain-containing protein 1 OS=Homo sapiens OX=9606 GN=FOXRED1 PE=1 SV=2	3508	4	6.49653	7.73186	7.90617	4.93889	0.251146	0.0321622	0.283308	-0.678792	-0.395483
	sp|P53701|CCHL_HUMAN	HCCS	Cytochrome c-type heme lyase OS=Homo sapiens OX=9606 GN=HCCS PE=1 SV=1	3668	8	6.22061	7.40155	7.37478	6.80131	0.250771	-0.00522806	0.245543	-0.116786	0.128757
	sp|O94929|ABLM3_HUMAN	ABLIM3	Actin-binding LIM protein 3 OS=Homo sapiens OX=9606 GN=ABLIM3 PE=1 SV=3	3729	2	7.81803	9.30184	6.09062	6.0483	0.250711	-0.610927	-0.360216	-0.010061	-0.370277
	sp|Q9Y4K4|M4K5_HUMAN	MAP4K5	Mitogen-activated protein kinase kinase kinase kinase 5 OS=Homo sapiens OX=9606 GN=MAP4K5 PE=1 SV=2	1800	9	6.19661	7.37132	7.11923	6.63158	0.250443	-0.0502008	0.200242	-0.102369	0.0978735
	sp|Q9P0S9|TM14C_HUMAN	TMEM14C	Transmembrane protein 14C OS=Homo sapiens OX=9606 GN=TMEM14C PE=1 SV=1	5395	2	0.806969	0.959795	1.12883	1.07106	0.250214	0.234029	0.484243	-0.0757818	0.408461
	sp|Q9NVS2-2|RT18A_HUMAN	MRPS18A	Isoform 2 of 39S ribosomal protein S18a, mitochondrial OS=Homo sapiens OX=9606 GN=MRPS18A	4126	7	5.30564	6.30779	7.52048	4.56718	0.249608	0.25369	0.503298	-0.719523	-0.216225
	sp|O14874|BCKD_HUMAN	BCKDK	[3-methyl-2-oxobutanoate dehydrogenase [lipoamide]] kinase, mitochondrial OS=Homo sapiens OX=9606 GN=BCKDK PE=1 SV=2	3311	6	5.36153	6.37152	7.18791	5.66134	0.248994	0.173935	0.422929	-0.344429	0.0784997
	sp|P22307|NLTP_HUMAN	SCP2	Non-specific lipid-transfer protein OS=Homo sapiens OX=9606 GN=SCP2 PE=1 SV=2	668	14	6.40859	7.6151	6.89161	6.05424	0.248855	-0.144022	0.104834	-0.186894	-0.0820607
	tr|A0A3B3ITA3|A0A3B3ITA3_HUMAN	C8orf33	UPF0488 protein C8orf33 OS=Homo sapiens OX=9606 GN=C8orf33 PE=1 SV=1	84	4	6.89767	8.19146	6.46047	5.94497	0.248011	-0.342481	-0.09447	-0.11997	-0.21444
	sp|P17174|AATC_HUMAN	GOT1	Aspartate aminotransferase, cytoplasmic OS=Homo sapiens OX=9606 GN=GOT1 PE=1 SV=3	5000	16	6.2434	7.41235	7.24669	6.58389	0.247599	-0.0326098	0.214989	-0.138381	0.0766083
	tr|A0A0A6YYJ5|A0A0A6YYJ5_HUMAN	MACF1	Microtubule-actin cross-linking factor 1, isoforms 1/2/3/5 (Fragment) OS=Homo sapiens OX=9606 GN=MACF1 PE=1 SV=2	130	2	4.95275	5.87842	5.09849	6.824	0.247198	-0.205357	0.0418407	0.420547	0.462388
	sp|Q2NL82|TSR1_HUMAN	TSR1	Pre-rRNA-processing protein TSR1 homolog OS=Homo sapiens OX=9606 GN=TSR1 PE=1 SV=1	3814	9	3.68993	4.37819	3.39092	3.80764	0.246742	-0.368658	-0.121915	0.167218	0.045303
	sp|Q00765|REEP5_HUMAN	REEP5	Receptor expression-enhancing protein 5 OS=Homo sapiens OX=9606 GN=REEP5 PE=1 SV=3	1619	2	6.56757	7.79215	6.91389	7.13063	0.246662	-0.172524	0.0741376	0.0445333	0.118671
	sp|P11413-2|G6PD_HUMAN	G6PD	Isoform Long of Glucose-6-phosphate 1-dehydrogenase OS=Homo sapiens OX=9606 GN=G6PD	3278	25	6.45455	7.65732	6.75293	6.63227	0.246523	-0.181326	0.0651975	-0.0260094	0.0391881
	sp|P83111|LACTB_HUMAN	LACTB	Serine beta-lactamase-like protein LACTB, mitochondrial OS=Homo sapiens OX=9606 GN=LACTB PE=1 SV=2	5194	7	4.4969	5.334	4.48213	5.654	0.246287	-0.251035	-0.00474845	0.33509	0.330341
	sp|P29323|EPHB2_HUMAN	EPHB2	Ephrin type-B receptor 2 OS=Homo sapiens OX=9606 GN=EPHB2 PE=1 SV=5	2182	2	4.72268	5.60111	8.2973	9.62244	0.246105	0.56693	0.813035	0.213761	1.0268
	sp|Q9BYC9|RM20_HUMAN	MRPL20	39S ribosomal protein L20, mitochondrial OS=Homo sapiens OX=9606 GN=MRPL20 PE=1 SV=1	3398	4	5.79854	6.87639	7.51209	5.02733	0.245961	0.127563	0.373524	-0.579421	-0.205897
	sp|Q9BQ52|RNZ2_HUMAN	ELAC2	Zinc phosphodiesterase ELAC protein 2 OS=Homo sapiens OX=9606 GN=ELAC2 PE=1 SV=2	1797	9	5.50611	6.52925	6.06928	5.25653	0.245883	-0.10539	0.140493	-0.207414	-0.0669213
	sp|Q9H2D6|TARA_HUMAN	TRIOBP	TRIO and F-actin-binding protein OS=Homo sapiens OX=9606 GN=TRIOBP PE=1 SV=3	663	8	5.96151	7.06834	6.075	7.67445	0.245694	-0.218488	0.0272066	0.33718	0.364386
	sp|Q9P2D0|IBTK_HUMAN	IBTK	Inhibitor of Bruton tyrosine kinase OS=Homo sapiens OX=9606 GN=IBTK PE=1 SV=3	3735	2	6.53313	7.74537	6.54366	6.58949	0.245558	-0.243235	0.00232307	0.0100687	0.0123917
	sp|O14933|UB2L6_HUMAN	UBE2L6	Ubiquitin/ISG15-conjugating enzyme E2 L6 OS=Homo sapiens OX=9606 GN=UBE2L6 PE=1 SV=4	6094	2	5.78017	6.85093	6.36292	5.56909	0.245189	-0.10661	0.138578	-0.192246	-0.0536682
	sp|O60706|ABCC9_HUMAN	ABCC9	ATP-binding cassette sub-family C member 9 OS=Homo sapiens OX=9606 GN=ABCC9 PE=1 SV=2	3005	3	2.681	3.17762	11.6133	6.37214	0.245175	1.86976	2.11493	-0.86593	1.249
	sp|P11233|RALA_HUMAN	RALA	Ras-related protein Ral-A OS=Homo sapiens OX=9606 GN=RALA PE=1 SV=1	921	7	5.96502	7.06958	5.63296	8.79558	0.245098	-0.32773	-0.0826329	0.642885	0.560252
	sp|Q9Y6Y0|NS1BP_HUMAN	IVNS1ABP	Influenza virus NS1A-binding protein OS=Homo sapiens OX=9606 GN=IVNS1ABP PE=1 SV=3	6300	2	6.87644	8.14834	7.23216	5.76636	0.244844	-0.172079	0.0727654	-0.326766	-0.254
	tr|A0A2R8Y4H2|A0A2R8Y4H2_HUMAN	SEPTIN3	Neuronal-specific septin-3 OS=Homo sapiens OX=9606 GN=SEPTIN3 PE=1 SV=1	1515	2	7.31588	8.66904	7.555	3.35763	0.244841	-0.19844	0.0464007	-1.16999	-1.12359
	sp|Q96RF0-2|SNX18_HUMAN	SNX18	Isoform 2 of Sorting nexin-18 OS=Homo sapiens OX=9606 GN=SNX18	3347	6	5.43344	6.43567	5.44144	8.53145	0.244224	-0.242101	0.00212261	0.648802	0.650925
	sp|Q9NQ92|COPRS_HUMAN	COPRS	Coordinator of PRMT5 and differentiation stimulator OS=Homo sapiens OX=9606 GN=COPRS PE=1 SV=3	788	2	6.13751	7.26934	6.36911	6.59341	0.244171	-0.190731	0.0534399	0.0499312	0.103371
	sp|Q9NP92|RT30_HUMAN	MRPS30	39S ribosomal protein S30, mitochondrial OS=Homo sapiens OX=9606 GN=MRPS30 PE=1 SV=2	6547	3	5.86755	6.94958	8.4026	5.56649	0.244167	0.27391	0.518077	-0.594068	-0.0759911
	sp|Q9NUI1|DECR2_HUMAN	DECR2	Peroxisomal 2,4-dienoyl-CoA reductase OS=Homo sapiens OX=9606 GN=DECR2 PE=1 SV=1	2403	4	5.53937	6.55804	6.61191	4.82086	0.243543	0.011802	0.255345	-0.455774	-0.200429
	sp|P54803|GALC_HUMAN	GALC	Galactocerebrosidase OS=Homo sapiens OX=9606 GN=GALC PE=1 SV=3	4662	8	5.89036	6.97222	5.67324	9.263	0.243261	-0.297446	-0.0541846	0.707308	0.653124
	tr|A0A0A0MT26|A0A0A0MT26_HUMAN	ATP1A3	Sodium/potassium-transporting ATPase subunit alpha-3 OS=Homo sapiens OX=9606 GN=ATP1A3 PE=1 SV=1	534	13	6.09476	7.21277	6.95467	6.64645	0.242983	-0.0525707	0.190413	-0.0653988	0.125014
	sp|P53582|MAP11_HUMAN	METAP1	Methionine aminopeptidase 1 OS=Homo sapiens OX=9606 GN=METAP1 PE=1 SV=2	6256	5	5.98172	7.07679	6.70644	7.20509	0.242534	-0.0775469	0.164987	0.103469	0.268456
	sp|P0C7P0|CISD3_HUMAN	CISD3	CDGSH iron-sulfur domain-containing protein 3, mitochondrial OS=Homo sapiens OX=9606 GN=CISD3 PE=1 SV=1	2800	5	7.12246	8.4196	7.26554	4.89029	0.241376	-0.212681	0.0286941	-0.57115	-0.542456
	sp|P55010|IF5_HUMAN	EIF5	Eukaryotic translation initiation factor 5 OS=Homo sapiens OX=9606 GN=EIF5 PE=1 SV=2	2037	15	5.94426	7.02632	6.32651	6.86535	0.241271	-0.151358	0.089913	0.117923	0.207836
	sp|O75695|XRP2_HUMAN	RP2	Protein XRP2 OS=Homo sapiens OX=9606 GN=RP2 PE=1 SV=4	2336	4	6.30676	7.45374	6.8149	8.91454	0.241066	-0.129272	0.111794	0.387467	0.499261
	sp|Q9BRT8|CBWD1_HUMAN	CBWD1	COBW domain-containing protein 1 OS=Homo sapiens OX=9606 GN=CBWD1 PE=2 SV=1	1615	5	5.78344	6.83225	6.38085	6.82769	0.240431	-0.0986107	0.141821	0.0976482	0.239469
	sp|P50995|ANX11_HUMAN	ANXA11	Annexin A11 OS=Homo sapiens OX=9606 GN=ANXA11 PE=1 SV=1	1543	14	6.19587	7.31928	6.16597	6.22085	0.240395	-0.247374	-0.006979	0.0127819	0.00580291
	sp|Q15633|TRBP2_HUMAN	TARBP2	RISC-loading complex subunit TARBP2 OS=Homo sapiens OX=9606 GN=TARBP2 PE=1 SV=3	4698	2	6.83043	8.06746	6.95808	6.77893	0.240137	-0.213425	0.0267125	-0.0376331	-0.0109206
	tr|A0A140TA35|A0A140TA35_HUMAN	VARS2	VARS2 OS=Homo sapiens OX=9606 GN=VARS2 PE=1 SV=1	4368	4	7.64361	9.02555	6.52494	5.42145	0.239762	-0.468051	-0.228289	-0.267286	-0.495575
	sp|Q9UMY1|NOL7_HUMAN	NOL7	Nucleolar protein 7 OS=Homo sapiens OX=9606 GN=NOL7 PE=1 SV=2	541	4	4.72341	5.57723	4.19855	4.52531	0.239721	-0.409659	-0.169938	0.108126	-0.0618121
	sp|Q8NF91-4|SYNE1_HUMAN	SYNE1	Isoform 4 of Nesprin-1 OS=Homo sapiens OX=9606 GN=SYNE1	1158	29	6.30503	7.442	6.13251	8.46276	0.239189	-0.279213	-0.0400244	0.46465	0.424626
	sp|O75923-13|DYSF_HUMAN	DYSF	Isoform 13 of Dysferlin OS=Homo sapiens OX=9606 GN=DYSF	455	4	5.68988	6.714	6.34186	7.79016	0.238773	-0.0822673	0.156506	0.296748	0.453254
	sp|P38435|VKGC_HUMAN	GGCX	Vitamin K-dependent gamma-carboxylase OS=Homo sapiens OX=9606 GN=GGCX PE=1 SV=2	398	3	5.16907	6.09875	6.56264	5.87005	0.238608	0.105763	0.344371	-0.160903	0.183468
	sp|O60437|PEPL_HUMAN	PPL	Periplakin OS=Homo sapiens OX=9606 GN=PPL PE=1 SV=4	1413	19	4.8924	5.77002	7.71568	10.4568	0.238034	0.419217	0.657251	0.438572	1.09582
	sp|O95817|BAG3_HUMAN	BAG3	BAG family molecular chaperone regulator 3 OS=Homo sapiens OX=9606 GN=BAG3 PE=1 SV=3	400	17	5.66359	6.67936	7.00183	6.57948	0.237993	0.0680204	0.306013	-0.0897574	0.216256
	sp|Q96CM8-2|ACSF2_HUMAN	ACSF2	Isoform 2 of Medium-chain acyl-CoA ligase ACSF2, mitochondrial OS=Homo sapiens OX=9606 GN=ACSF2	445	13	6.81654	8.03774	6.02815	5.18366	0.237751	-0.415076	-0.177325	-0.217742	-0.395067
	sp|O60504|VINEX_HUMAN	SORBS3	Vinexin OS=Homo sapiens OX=9606 GN=SORBS3 PE=1 SV=2	4836	11	6.10227	7.19354	6.03745	6.83436	0.237355	-0.252762	-0.0154067	0.178865	0.163458
	sp|P21266|GSTM3_HUMAN	GSTM3	Glutathione S-transferase Mu 3 OS=Homo sapiens OX=9606 GN=GSTM3 PE=1 SV=3	3287	17	6.14385	7.242	6.83885	7.40527	0.237245	-0.0826344	0.154611	0.114798	0.269409
	sp|Q9H5Q4|TFB2M_HUMAN	TFB2M	Dimethyladenosine transferase 2, mitochondrial OS=Homo sapiens OX=9606 GN=TFB2M PE=1 SV=1	3906	9	6.36828	7.50265	7.10828	5.51242	0.236495	-0.0778994	0.158596	-0.366814	-0.208219
	sp|Q9HB71|CYBP_HUMAN	CACYBP	Calcyclin-binding protein OS=Homo sapiens OX=9606 GN=CACYBP PE=1 SV=2	999	6	6.38371	7.52005	6.97473	6.40033	0.236346	-0.108604	0.127742	-0.123993	0.0037493
	tr|Q86WV7|Q86WV7_HUMAN	CCDC43	CCDC43 protein OS=Homo sapiens OX=9606 GN=CCDC43 PE=1 SV=1	3650	4	6.73614	7.93447	7.08884	6.72755	0.236212	-0.162584	0.0736288	-0.075468	-0.00183913
	sp|Q8N5M1|ATPF2_HUMAN	ATPAF2	ATP synthase mitochondrial F1 complex assembly factor 2 OS=Homo sapiens OX=9606 GN=ATPAF2 PE=1 SV=1	5354	5	6.34529	7.47154	7.23703	7.56366	0.235719	-0.0460069	0.189712	0.0636858	0.253398
	sp|Q8NDH3|PEPL1_HUMAN	NPEPL1	Probable aminopeptidase NPEPL1 OS=Homo sapiens OX=9606 GN=NPEPL1 PE=1 SV=3	1226	7	5.97615	7.03606	7.55276	7.05581	0.235553	0.102236	0.337789	-0.0981918	0.239597
	sp|Q92692|NECT2_HUMAN	NECTIN2	Nectin-2 OS=Homo sapiens OX=9606 GN=NECTIN2 PE=1 SV=1	717	2	6.53955	7.69888	6.9056	7.92552	0.235457	-0.156881	0.0785765	0.198738	0.277314
	sp|Q96K21|ANCHR_HUMAN	ZFYVE19	Abscission/NoCut checkpoint regulator OS=Homo sapiens OX=9606 GN=ZFYVE19 PE=1 SV=3	2718	3	5.16886	6.08461	6.15568	5.95465	0.235318	0.0167554	0.252073	-0.0479039	0.204169
	sp|Q5T1C6|THEM4_HUMAN	THEM4	Acyl-coenzyme A thioesterase THEM4 OS=Homo sapiens OX=9606 GN=THEM4 PE=1 SV=1	3606	3	5.9808	7.03808	8.03555	6.36503	0.234845	0.191214	0.426059	-0.336229	0.0898296
	sp|Q14012|KCC1A_HUMAN	CAMK1	Calcium/calmodulin-dependent protein kinase type 1 OS=Homo sapiens OX=9606 GN=CAMK1 PE=1 SV=1	4015	3	6.69698	7.87996	7.02494	7.05977	0.234679	-0.165703	0.068976	0.00713426	0.0761102
	sp|O95140|MFN2_HUMAN	MFN2	Mitofusin-2 OS=Homo sapiens OX=9606 GN=MFN2 PE=1 SV=3	1505	13	5.75678	6.77155	6.62821	6.06161	0.234225	-0.0308657	0.203359	-0.128918	0.074441
	sp|Q9UBY9|HSPB7_HUMAN	HSPB7	Heat shock protein beta-7 OS=Homo sapiens OX=9606 GN=HSPB7 PE=1 SV=1	2043	2	3.01582	3.54724	10.2218	9.49005	0.234145	1.52688	1.76103	-0.107161	1.65387
	sp|Q53ET0|CRTC2_HUMAN	CRTC2	CREB-regulated transcription coactivator 2 OS=Homo sapiens OX=9606 GN=CRTC2 PE=1 SV=2	6632	2	5.34345	6.285	6.69129	6.09413	0.23414	0.090372	0.324512	-0.134865	0.189648
	sp|P53611|PGTB2_HUMAN	RABGGTB	Geranylgeranyl transferase type-2 subunit beta OS=Homo sapiens OX=9606 GN=RABGGTB PE=1 SV=2	4554	3	6.7928	7.98902	6.89603	7.13917	0.234013	-0.212252	0.0217607	0.0499889	0.0717497
	sp|Q9GZM8-2|NDEL1_HUMAN	NDEL1	Isoform 2 of Nuclear distribution protein nudE-like 1 OS=Homo sapiens OX=9606 GN=NDEL1	2775	2	6.53008	7.67976	6.99012	7.7149	0.233959	-0.135744	0.0982148	0.142331	0.240546
	sp|Q9Y3A4|RRP7A_HUMAN	RRP7A	Ribosomal RNA-processing protein 7 homolog A OS=Homo sapiens OX=9606 GN=RRP7A PE=1 SV=2	1745	3	6.92342	8.14163	6.71577	7.25515	0.233833	-0.277765	-0.0439324	0.111454	0.0675213
	sp|Q9NWK9|BCD1_HUMAN	ZNHIT6	Box C/D snoRNA protein 1 OS=Homo sapiens OX=9606 GN=ZNHIT6 PE=1 SV=1	3686	5	5.59636	6.58091	6.22097	5.56039	0.233798	-0.0811468	0.152652	-0.161953	-0.0093014
	sp|P54652|HSP72_HUMAN	HSPA2	Heat shock-related 70 kDa protein 2 OS=Homo sapiens OX=9606 GN=HSPA2 PE=1 SV=1	35	15	6.87045	8.0785	6.57602	7.68006	0.233683	-0.296873	-0.0631906	0.223905	0.160714
	sp|Q96CT7|CC124_HUMAN	CCDC124	Coiled-coil domain-containing protein 124 OS=Homo sapiens OX=9606 GN=CCDC124 PE=1 SV=1	200	8	6.20397	7.29412	6.421	7.20815	0.233543	-0.183937	0.0496059	0.166833	0.216439
	sp|P30837|AL1B1_HUMAN	ALDH1B1	Aldehyde dehydrogenase X, mitochondrial OS=Homo sapiens OX=9606 GN=ALDH1B1 PE=1 SV=3	194	18	5.57297	6.55184	6.15518	7.36123	0.233453	-0.0900987	0.143354	0.258147	0.401501
	sp|Q14197|ICT1_HUMAN	MRPL58	Peptidyl-tRNA hydrolase ICT1, mitochondrial OS=Homo sapiens OX=9606 GN=MRPL58 PE=1 SV=1	4092	8	6.0801	7.14748	8.26088	5.37599	0.23334	0.20886	0.4422	-0.619764	-0.177565
	sp|O95573|ACSL3_HUMAN	ACSL3	Long-chain-fatty-acid--CoA ligase 3 OS=Homo sapiens OX=9606 GN=ACSL3 PE=1 SV=3	1217	16	4.10404	4.82311	3.91139	4.69031	0.23292	-0.302281	-0.069361	0.261999	0.192638
	sp|Q16222|UAP1_HUMAN	UAP1	UDP-N-acetylhexosamine pyrophosphorylase OS=Homo sapiens OX=9606 GN=UAP1 PE=1 SV=3	313	9	5.24331	6.16157	5.92531	6.91402	0.232819	-0.0564078	0.176411	0.222634	0.399045
	sp|Q92844|TANK_HUMAN	TANK	TRAF family member-associated NF-kappa-B activator OS=Homo sapiens OX=9606 GN=TANK PE=1 SV=2	5053	6	5.75951	6.76783	6.06647	6.15428	0.232748	-0.157836	0.074912	0.0207308	0.0956428
	sp|Q14CX7|NAA25_HUMAN	NAA25	N-alpha-acetyltransferase 25, NatB auxiliary subunit OS=Homo sapiens OX=9606 GN=NAA25 PE=1 SV=1	3928	8	6.88392	8.08882	6.87655	6.91124	0.2327	-0.234246	-0.00154644	0.00726069	0.00571425
	sp|P35754|GLRX1_HUMAN	GLRX	Glutaredoxin-1 OS=Homo sapiens OX=9606 GN=GLRX PE=1 SV=2	2475	3	6.16581	7.24141	6.05727	7.75339	0.231981	-0.257603	-0.0256219	0.35616	0.330539
	sp|O76021|RL1D1_HUMAN	RSL1D1	Ribosomal L1 domain-containing protein 1 OS=Homo sapiens OX=9606 GN=RSL1D1 PE=1 SV=3	164	12	7.01739	8.23975	6.57096	6.64575	0.231666	-0.326497	-0.0948311	0.0163286	-0.0785025
	tr|A0A494C0R8|A0A494C0R8_HUMAN	CLUH	Clustered mitochondria protein homolog OS=Homo sapiens OX=9606 GN=CLUH PE=1 SV=1	867	11	6.87195	8.06844	6.8698	6.1032	0.231572	-0.232023	-0.000451441	-0.170702	-0.171153
	sp|Q9BV57|MTND_HUMAN	ADI1	1,2-dihydroxy-3-keto-5-methylthiopentene dioxygenase OS=Homo sapiens OX=9606 GN=ADI1 PE=1 SV=1	5566	7	6.01826	7.06503	7.76166	6.48484	0.231348	0.13567	0.367018	-0.259293	0.107725
	sp|Q7L0Y3|TM10C_HUMAN	TRMT10C	tRNA methyltransferase 10 homolog C OS=Homo sapiens OX=9606 GN=TRMT10C PE=1 SV=2	4238	17	5.98814	7.02952	6.60868	5.69464	0.23132	-0.0890651	0.142255	-0.214756	-0.0725012
	sp|Q86VU5|CMTD1_HUMAN	COMTD1	Catechol O-methyltransferase domain-containing protein 1 OS=Homo sapiens OX=9606 GN=COMTD1 PE=1 SV=1	3315	3	7.7324	9.07213	6.64408	4.86097	0.230525	-0.449371	-0.218846	-0.450824	-0.66967
	sp|O14737|PDCD5_HUMAN	PDCD5	Programmed cell death protein 5 OS=Homo sapiens OX=9606 GN=PDCD5 PE=1 SV=3	2874	4	5.34239	6.2674	5.85694	5.68535	0.230382	-0.0977211	0.132661	-0.0428975	0.089763
	sp|Q9UFN0|NPS3A_HUMAN	NIPSNAP3A	Protein NipSnap homolog 3A OS=Homo sapiens OX=9606 GN=NIPSNAP3A PE=1 SV=2	1672	9	5.98091	7.01566	6.8355	6.31868	0.230214	-0.037532	0.192682	-0.113423	0.079259
	sp|Q07960|RHG01_HUMAN	ARHGAP1	Rho GTPase-activating protein 1 OS=Homo sapiens OX=9606 GN=ARHGAP1 PE=1 SV=1	1679	16	5.7169	6.70511	7.20954	5.76928	0.23003	0.104645	0.334675	-0.321516	0.0131591
	sp|Q9UBR2|CATZ_HUMAN	CTSZ	Cathepsin Z OS=Homo sapiens OX=9606 GN=CTSZ PE=1 SV=1	5405	5	5.17718	6.07184	7.76771	8.37285	0.229969	0.355354	0.585323	0.108231	0.693554
	sp|P48509|CD151_HUMAN	CD151	CD151 antigen OS=Homo sapiens OX=9606 GN=CD151 PE=1 SV=3	6246	3	6.45018	7.56007	7.10081	7.68219	0.229062	-0.0904166	0.138645	0.113534	0.252179
	sp|Q9BU89|DOHH_HUMAN	DOHH	Deoxyhypusine hydroxylase OS=Homo sapiens OX=9606 GN=DOHH PE=1 SV=1	5858	2	6.68823	7.83779	6.93604	7.40286	0.228824	-0.176335	0.0524885	0.0939696	0.146458
	sp|Q8WWN8|ARAP3_HUMAN	ARAP3	Arf-GAP with Rho-GAP domain, ANK repeat and PH domain-containing protein 3 OS=Homo sapiens OX=9606 GN=ARAP3 PE=1 SV=1	5320	2	7.09283	8.31141	7.16518	5.39805	0.228732	-0.21409	0.0146422	-0.408564	-0.393922
	sp|Q8IWA4|MFN1_HUMAN	MFN1	Mitofusin-1 OS=Homo sapiens OX=9606 GN=MFN1 PE=1 SV=3	1505	9	6.67281	7.8153	6.73523	6.69316	0.228007	-0.214575	0.0134321	-0.00903971	0.00439236
	sp|Q9NXD2|MTMRA_HUMAN	MTMR10	Myotubularin-related protein 10 OS=Homo sapiens OX=9606 GN=MTMR10 PE=1 SV=3	5197	5	6.94189	8.12987	6.48178	6.59232	0.227903	-0.326841	-0.0989381	0.0243969	-0.0745411
	sp|P12109|CO6A1_HUMAN	COL6A1	Collagen alpha-1(VI) chain OS=Homo sapiens OX=9606 GN=COL6A1 PE=1 SV=3	2837	22	5.89416	6.89305	6.45869	5.79555	0.225855	-0.0938991	0.131956	-0.156297	-0.0243415
	sp|Q9UJY1|HSPB8_HUMAN	HSPB8	Heat shock protein beta-8 OS=Homo sapiens OX=9606 GN=HSPB8 PE=1 SV=1	3847	2	4.85656	5.67905	6.02389	6.87217	0.225716	0.0850462	0.310762	0.190071	0.500833
	sp|P56537|IF6_HUMAN	EIF6	Eukaryotic translation initiation factor 6 OS=Homo sapiens OX=9606 GN=EIF6 PE=1 SV=1	2607	6	6.65434	7.77634	6.93371	7.55283	0.224796	-0.165464	0.0593326	0.123388	0.182721
	sp|O00159-3|MYO1C_HUMAN	MYO1C	Isoform 3 of Unconventional myosin-Ic OS=Homo sapiens OX=9606 GN=MYO1C	255	20	5.98095	6.98894	6.39972	7.74467	0.2247	-0.127066	0.0976338	0.275196	0.37283
	sp|P17812|PYRG1_HUMAN	CTPS1	CTP synthase 1 OS=Homo sapiens OX=9606 GN=CTPS1 PE=1 SV=2	1852	10	1.25338	1.4642	1.23473	1.22016	0.224293	-0.245917	-0.0216244	-0.0171193	-0.0387438
	sp|Q92783|STAM1_HUMAN	STAM	Signal transducing adapter molecule 1 OS=Homo sapiens OX=9606 GN=STAM PE=1 SV=3	1612	10	6.17899	7.21424	6.48569	6.53892	0.223477	-0.153588	0.069889	0.0117934	0.0816824
	sp|Q15121-2|PEA15_HUMAN	PEA15	Isoform 2 of Astrocytic phosphoprotein PEA-15 OS=Homo sapiens OX=9606 GN=PEA15	4117	5	6.50373	7.59234	7.20793	7.2321	0.223276	-0.0749586	0.148317	0.00483029	0.153148
	sp|Q96BR5|COA7_HUMAN	COA7	Cytochrome c oxidase assembly factor 7 OS=Homo sapiens OX=9606 GN=COA7 PE=1 SV=2	577	5	4.74946	5.54441	4.70972	4.35951	0.223271	-0.235391	-0.0121202	-0.111478	-0.123598
	sp|Q02790|FKBP4_HUMAN	FKBP4	Peptidyl-prolyl cis-trans isomerase FKBP4 OS=Homo sapiens OX=9606 GN=FKBP4 PE=1 SV=3	1859	15	6.02629	7.02868	6.44277	5.57209	0.221985	-0.125573	0.0964125	-0.209463	-0.113051
	tr|H0Y8X4|H0Y8X4_HUMAN	DNPH1	2'-deoxynucleoside 5'-phosphate N-hydrolase 1 (Fragment) OS=Homo sapiens OX=9606 GN=DNPH1 PE=1 SV=1	5322	5	2.0977	2.44579	2.86919	2.3418	0.221492	0.230345	0.451837	-0.293026	0.158812
	sp|O14832|PAHX_HUMAN	PHYH	Phytanoyl-CoA dioxygenase, peroxisomal OS=Homo sapiens OX=9606 GN=PHYH PE=1 SV=1	6486	3	5.14495	5.99718	6.29505	5.17007	0.221128	0.0699328	0.291061	-0.284034	0.00702676
	sp|P49137|MAPK2_HUMAN	MAPKAPK2	MAP kinase-activated protein kinase 2 OS=Homo sapiens OX=9606 GN=MAPKAPK2 PE=1 SV=1	1834	8	5.76714	6.72041	6.19051	6.36104	0.220695	-0.118492	0.102202	0.0392063	0.141409
	sp|Q96A35|RM24_HUMAN	MRPL24	39S ribosomal protein L24, mitochondrial OS=Homo sapiens OX=9606 GN=MRPL24 PE=1 SV=1	708	7	5.77792	6.72906	8.09259	5.19969	0.219854	0.266196	0.48605	-0.638175	-0.152125
	sp|C9JJ37|BTBDJ_HUMAN	BTBD19	BTB/POZ domain-containing protein 19 OS=Homo sapiens OX=9606 GN=BTBD19 PE=2 SV=1	5352	2	7.41955	8.64013	6.74006	5.69027	0.219722	-0.358292	-0.13857	-0.244263	-0.382833
	sp|Q9UG63-2|ABCF2_HUMAN	ABCF2	Isoform 2 of ATP-binding cassette sub-family F member 2 OS=Homo sapiens OX=9606 GN=ABCF2	4857	13	6.4635	7.5264	6.67813	6.64147	0.219644	-0.172517	0.0471279	-0.00794195	0.0391859
	sp|Q01581|HMCS1_HUMAN	HMGCS1	Hydroxymethylglutaryl-CoA synthase, cytoplasmic OS=Homo sapiens OX=9606 GN=HMGCS1 PE=1 SV=2	5985	13	6.74931	7.85708	6.8114	4.26354	0.219254	-0.206043	0.0132113	-0.675901	-0.66269
	sp|Q9BVJ6|UT14A_HUMAN	UTP14A	U3 small nucleolar RNA-associated protein 14 homolog A OS=Homo sapiens OX=9606 GN=UTP14A PE=1 SV=1	884	7	7.19301	8.37265	6.42524	6.97797	0.219087	-0.381934	-0.162847	0.119058	-0.0437889
	sp|P04626|ERBB2_HUMAN	ERBB2	Receptor tyrosine-protein kinase erbB-2 OS=Homo sapiens OX=9606 GN=ERBB2 PE=1 SV=1	4797	3	6.49359	7.55834	7.20327	7.31232	0.219054	-0.0694174	0.149636	0.0216772	0.171314
	sp|P04921|GLPC_HUMAN	GYPC	Glycophorin-C OS=Homo sapiens OX=9606 GN=GYPC PE=1 SV=1	5805	2	6.21023	7.22774	7.30374	7.93185	0.218899	0.0150898	0.233988	0.119023	0.353011
	sp|Q96H72|S39AD_HUMAN	SLC39A13	Zinc transporter ZIP13 OS=Homo sapiens OX=9606 GN=SLC39A13 PE=1 SV=3	4167	2	6.65714	7.7468	7.26667	6.59406	0.218699	-0.0923067	0.126392	-0.140127	-0.0137355
	sp|Q9NRX2|RM17_HUMAN	MRPL17	39S ribosomal protein L17, mitochondrial OS=Homo sapiens OX=9606 GN=MRPL17 PE=1 SV=1	6262	4	6.07753	7.07191	8.31595	5.32801	0.218616	0.233781	0.452397	-0.642285	-0.189888
	sp|P33316|DUT_HUMAN	DUT	Deoxyuridine 5'-triphosphate nucleotidohydrolase, mitochondrial OS=Homo sapiens OX=9606 GN=DUT PE=1 SV=4	251	8	4.93113	5.73785	5.95769	5.6067	0.218594	0.054242	0.272836	-0.0876025	0.185233
	sp|P05141|ADT2_HUMAN	SLC25A5	ADP/ATP translocase 2 OS=Homo sapiens OX=9606 GN=SLC25A5 PE=1 SV=7	557	8	5.80805	6.75656	6.09106	5.00521	0.218237	-0.149597	0.0686399	-0.283262	-0.214622
	sp|Q6P158|DHX57_HUMAN	DHX57	Putative ATP-dependent RNA helicase DHX57 OS=Homo sapiens OX=9606 GN=DHX57 PE=1 SV=2	1073	10	5.80731	6.75217	6.39294	6.47513	0.217481	-0.0788713	0.13861	0.01843	0.15704
	sp|Q96G28-2|CFA36_HUMAN	CFAP36	Isoform 2 of Cilia- and flagella-associated protein 36 OS=Homo sapiens OX=9606 GN=CFAP36	5671	2	6.36767	7.40297	6.42815	6.93641	0.217338	-0.203701	0.0136365	0.109786	0.123423
	sp|P26373|RL13_HUMAN	RPL13	60S ribosomal protein L13 OS=Homo sapiens OX=9606 GN=RPL13 PE=1 SV=4	4424	9	5.69611	6.62016	5.74918	5.63855	0.216888	-0.203508	0.0133792	-0.0280328	-0.0146536
	sp|Q9UNQ2|DIM1_HUMAN	DIMT1	Probable dimethyladenosine transferase OS=Homo sapiens OX=9606 GN=DIMT1 PE=1 SV=1	3125	4	5.76088	6.69214	5.38445	5.9177	0.216178	-0.313667	-0.0974898	0.136237	0.0387474
	sp|O00299|CLIC1_HUMAN	CLIC1	Chloride intracellular channel protein 1 OS=Homo sapiens OX=9606 GN=CLIC1 PE=1 SV=4	4609	14	6.24838	7.25832	6.55482	6.84112	0.216155	-0.147079	0.0690755	0.0616746	0.13075
	sp|Q7RTS9|DYM_HUMAN	DYM	Dymeclin OS=Homo sapiens OX=9606 GN=DYM PE=1 SV=1	5739	4	5.8368	6.7796	6.82538	6.46651	0.216024	0.00970921	0.225733	-0.0779228	0.14781
	sp|P41091|IF2G_HUMAN	EIF2S3	Eukaryotic translation initiation factor 2 subunit 3 OS=Homo sapiens OX=9606 GN=EIF2S3 PE=1 SV=3	5064	12	4.85819	5.64201	5.04715	5.12165	0.21579	-0.16074	0.05505	0.0211373	0.0761874
	sp|Q8TAE8|G45IP_HUMAN	GADD45GIP1	Growth arrest and DNA damage-inducible proteins-interacting protein 1 OS=Homo sapiens OX=9606 GN=GADD45GIP1 PE=1 SV=1	36	3	6.00548	6.97393	8.32158	5.56611	0.215692	0.254886	0.470578	-0.580188	-0.10961
	sp|Q8IXM2-3|BAP18_HUMAN	BAP18	Isoform 3 of Chromatin complexes subunit BAP18 OS=Homo sapiens OX=9606 GN=BAP18	823	2	5.53899	6.43074	6.00415	6.55284	0.215363	-0.0990267	0.116336	0.126161	0.242497
	sp|Q9UGP4|LIMD1_HUMAN	LIMD1	LIM domain-containing protein 1 OS=Homo sapiens OX=9606 GN=LIMD1 PE=1 SV=1	830	11	5.20177	6.03848	4.91011	5.92029	0.215183	-0.298431	-0.0832487	0.269913	0.186664
	sp|Q96CV9|OPTN_HUMAN	OPTN	Optineurin OS=Homo sapiens OX=9606 GN=OPTN PE=1 SV=3	748	15	6.03138	7.00133	6.04827	6.47926	0.21514	-0.211106	0.00403401	0.0993061	0.10334
	sp|O75223|GGCT_HUMAN	GGCT	Gamma-glutamylcyclotransferase OS=Homo sapiens OX=9606 GN=GGCT PE=1 SV=1	1616	9	6.37909	7.40473	6.99246	6.42342	0.215095	-0.0826457	0.132449	-0.12246	0.00998912
	sp|P02786|TFR1_HUMAN	TFRC	Transferrin receptor protein 1 OS=Homo sapiens OX=9606 GN=TFRC PE=1 SV=2	21	26	5.96898	6.92836	5.46356	5.43776	0.215029	-0.342672	-0.127644	-0.00682706	-0.134471
	sp|Q9H1K1|ISCU_HUMAN	ISCU	Iron-sulfur cluster assembly enzyme ISCU, mitochondrial OS=Homo sapiens OX=9606 GN=ISCU PE=1 SV=2	286	6	6.38642	7.41279	6.44814	6.45754	0.21501	-0.201133	0.0138768	0.00210123	0.015978
	sp|Q5TFE4|NT5D1_HUMAN	NT5DC1	5'-nucleotidase domain-containing protein 1 OS=Homo sapiens OX=9606 GN=NT5DC1 PE=1 SV=1	3940	8	4.76356	5.5256	4.98297	3.89499	0.214092	-0.149126	0.0649663	-0.355386	-0.29042
	sp|Q9UL42|PNMA2_HUMAN	PNMA2	Paraneoplastic antigen Ma2 OS=Homo sapiens OX=9606 GN=PNMA2 PE=1 SV=2	4278	2	6.65482	7.71896	6.7162	7.1771	0.214005	-0.20076	0.0132452	0.0957555	0.109001
	sp|P46087-4|NOP2_HUMAN	NOP2	Isoform 4 of Probable 28S rRNA (cytosine(4447)-C(5))-methyltransferase OS=Homo sapiens OX=9606 GN=NOP2	3959	12	7.09892	8.23325	6.40368	6.1676	0.213861	-0.362561	-0.148699	-0.0541928	-0.202892
	sp|Q03405|UPAR_HUMAN	PLAUR	Urokinase plasminogen activator surface receptor OS=Homo sapiens OX=9606 GN=PLAUR PE=1 SV=1	5746	3	6.0067	6.9657	5.64197	3.79851	0.213696	-0.304068	-0.0903728	-0.570766	-0.661139
	sp|P32929|CGL_HUMAN	CTH	Cystathionine gamma-lyase OS=Homo sapiens OX=9606 GN=CTH PE=1 SV=3	1340	5	6.8696	7.96566	5.96288	9.30382	0.213568	-0.417785	-0.204217	0.641815	0.437598
	sp|Q9Y3D2|MSRB2_HUMAN	MSRB2	Methionine-R-sulfoxide reductase B2, mitochondrial OS=Homo sapiens OX=9606 GN=MSRB2 PE=1 SV=2	4457	7	6.08931	7.06015	7.61219	6.56726	0.213419	0.108614	0.322033	-0.213019	0.109014
	sp|Q99797|MIPEP_HUMAN	MIPEP	Mitochondrial intermediate peptidase OS=Homo sapiens OX=9606 GN=MIPEP PE=1 SV=2	2072	13	6.66409	7.72536	6.64904	6.53999	0.213194	-0.216457	-0.00326219	-0.0238565	-0.0271187
	sp|Q01518|CAP1_HUMAN	CAP1	Adenylyl cyclase-associated protein 1 OS=Homo sapiens OX=9606 GN=CAP1 PE=1 SV=5	1204	18	6.34268	7.35197	6.78196	6.82403	0.21304	-0.116429	0.0966105	0.00892171	0.105532
	tr|H0YIV9|H0YIV9_HUMAN		Uncharacterized protein (Fragment) OS=Homo sapiens OX=9606 PE=3 SV=1	1572	5	5.95195	6.89761	6.79742	6.22159	0.212735	-0.0211103	0.191625	-0.127705	0.0639198
	sp|Q96JX3|SRAC1_HUMAN	SERAC1	Protein SERAC1 OS=Homo sapiens OX=9606 GN=SERAC1 PE=1 SV=1	3009	7	4.82566	5.59206	6.43968	6.61074	0.212652	0.203611	0.416263	0.0378217	0.454085
	sp|Q9NQZ2|SAS10_HUMAN	UTP3	Something about silencing protein 10 OS=Homo sapiens OX=9606 GN=UTP3 PE=1 SV=1	1718	4	6.73425	7.80275	6.39366	6.74496	0.212465	-0.28734	-0.0748756	0.0771693	0.00229368
	sp|Q68CQ4|DIEXF_HUMAN	DIEXF	Digestive organ expansion factor homolog OS=Homo sapiens OX=9606 GN=DIEXF PE=1 SV=2	418	3	7.08995	8.21251	6.68141	7.00208	0.212048	-0.297672	-0.0856243	0.0676317	-0.0179926
	sp|P54819|KAD2_HUMAN	AK2	Adenylate kinase 2, mitochondrial OS=Homo sapiens OX=9606 GN=AK2 PE=1 SV=2	2244	15	6.219	7.20341	6.98949	6.49672	0.211997	-0.0434939	0.168503	-0.105475	0.0630281
	sp|Q13131-2|AAPK1_HUMAN	PRKAA1	Isoform 2 of 5'-AMP-activated protein kinase catalytic subunit alpha-1 OS=Homo sapiens OX=9606 GN=PRKAA1	4016	16	6.34174	7.34457	6.86918	6.7625	0.211799	-0.0965395	0.115259	-0.0225801	0.092679
	sp|P47895|AL1A3_HUMAN	ALDH1A3	Aldehyde dehydrogenase family 1 member A3 OS=Homo sapiens OX=9606 GN=ALDH1A3 PE=1 SV=2	194	5	2.31808	2.68447	2.71576	14.5128	0.211707	0.0167191	0.228426	2.4179	2.64632
	sp|Q5T7M9|DIK1A_HUMAN	DIPK1A	Divergent protein kinase domain 1A OS=Homo sapiens OX=9606 GN=DIPK1A PE=2 SV=1	3395	7	6.30389	7.29953	6.79406	5.97878	0.211561	-0.103529	0.108032	-0.184423	-0.0763912
	sp|Q15654|TRIP6_HUMAN	TRIP6	Thyroid receptor-interacting protein 6 OS=Homo sapiens OX=9606 GN=TRIP6 PE=1 SV=3	3067	7	6.76169	7.82928	6.43111	7.41903	0.211496	-0.283811	-0.0723154	0.206162	0.133847
	sp|Q9BRJ6|CG050_HUMAN	C7orf50	Uncharacterized protein C7orf50 OS=Homo sapiens OX=9606 GN=C7orf50 PE=1 SV=1	4845	3	6.76811	7.83369	6.85755	7.52468	0.210939	-0.192	0.0189392	0.133938	0.152877
	sp|Q9Y5K6|CD2AP_HUMAN	CD2AP	CD2-associated protein OS=Homo sapiens OX=9606 GN=CD2AP PE=1 SV=1	2308	9	5.10004	5.90228	5.19693	5.11985	0.210764	-0.183614	0.0271492	-0.0215572	0.00559204
	sp|Q99426|TBCB_HUMAN	TBCB	Tubulin-folding cofactor B OS=Homo sapiens OX=9606 GN=TBCB PE=1 SV=2	2462	4	6.14237	7.10728	6.45197	6.68863	0.210501	-0.139556	0.0709451	0.0519713	0.122916
	sp|Q8NBF2|NHLC2_HUMAN	NHLRC2	NHL repeat-containing protein 2 OS=Homo sapiens OX=9606 GN=NHLRC2 PE=1 SV=1	3807	14	6.20894	7.18407	6.83739	6.5565	0.210454	-0.071355	0.139099	-0.0605187	0.07858
	sp|Q92947|GCDH_HUMAN	GCDH	Glutaryl-CoA dehydrogenase, mitochondrial OS=Homo sapiens OX=9606 GN=GCDH PE=1 SV=1	1568	6	5.61968	6.50145	7.08482	6.77909	0.210273	0.12397	0.334243	-0.06364	0.270603
	sp|Q8N8A2|ANR44_HUMAN	ANKRD44	Serine/threonine-protein phosphatase 6 regulatory ankyrin repeat subunit B OS=Homo sapiens OX=9606 GN=ANKRD44 PE=1 SV=3	4031	6	6.69565	7.74197	7.46604	5.94545	0.209475	-0.0523575	0.157118	-0.328555	-0.171438
	sp|O75822|EIF3J_HUMAN	EIF3J	Eukaryotic translation initiation factor 3 subunit J OS=Homo sapiens OX=9606 GN=EIF3J PE=1 SV=2	3622	9	6.47094	7.4801	6.56592	6.16067	0.209084	-0.18806	0.0210233	-0.0919106	-0.0708873
	sp|Q9H2W6|RM46_HUMAN	MRPL46	39S ribosomal protein L46, mitochondrial OS=Homo sapiens OX=9606 GN=MRPL46 PE=1 SV=1	1985	6	5.77523	6.67524	7.37531	5.60837	0.20894	0.143885	0.352825	-0.395124	-0.042299
	sp|Q9Y375|CIA30_HUMAN	NDUFAF1	Complex I intermediate-associated protein 30, mitochondrial OS=Homo sapiens OX=9606 GN=NDUFAF1 PE=1 SV=2	4587	3	7.19902	8.3203	7.23316	5.02153	0.208834	-0.202009	0.0068252	-0.526499	-0.519674
	sp|Q9BPZ7|SIN1_HUMAN	MAPKAP1	Target of rapamycin complex 2 subunit MAPKAP1 OS=Homo sapiens OX=9606 GN=MAPKAP1 PE=1 SV=2	5310	2	6.38495	7.37657	6.20108	6.91567	0.208275	-0.250429	-0.0421547	0.157347	0.115193
	sp|Q9HA72|CAHM2_HUMAN	CALHM2	Calcium homeostasis modulator protein 2 OS=Homo sapiens OX=9606 GN=CALHM2 PE=2 SV=1	503	2	6.50864	7.51814	6.68921	8.49526	0.208019	-0.16854	0.0394786	0.344823	0.384301
	sp|P20042|IF2B_HUMAN	EIF2S2	Eukaryotic translation initiation factor 2 subunit 2 OS=Homo sapiens OX=9606 GN=EIF2S2 PE=1 SV=2	3430	21	5.78679	6.68249	5.69271	5.73786	0.207622	-0.231271	-0.0236494	0.0113993	-0.0122501
	sp|O43310-2|CTIF_HUMAN	CTIF	Isoform 2 of CBP80/20-dependent translation initiation factor OS=Homo sapiens OX=9606 GN=CTIF	4537	14	6.15851	7.11167	6.9389	6.09351	0.207608	-0.035481	0.172127	-0.187436	-0.0153083
	sp|Q9P0J1-2|PDP1_HUMAN	PDP1	Isoform 2 of [Pyruvate dehydrogenase [acetyl-transferring]]-phosphatase 1, mitochondrial OS=Homo sapiens OX=9606 GN=PDP1	1991	21	5.54766	6.40601	6.4246	6.30849	0.207545	0.00418059	0.211726	-0.0263123	0.185413
	sp|Q96FK6|WDR89_HUMAN	WDR89	WD repeat-containing protein 89 OS=Homo sapiens OX=9606 GN=WDR89 PE=2 SV=1	4535	2	6.34487	7.32453	6.30026	5.96295	0.207146	-0.217325	-0.0101785	-0.0793851	-0.0895636
	sp|O75312|ZPR1_HUMAN	ZPR1	Zinc finger protein ZPR1 OS=Homo sapiens OX=9606 GN=ZPR1 PE=1 SV=1	1701	8	6.43733	7.42827	6.63826	7.14215	0.206562	-0.162222	0.0443409	0.105555	0.149896
	sp|Q96DB5|RMD1_HUMAN	RMDN1	Regulator of microtubule dynamics protein 1 OS=Homo sapiens OX=9606 GN=RMDN1 PE=1 SV=1	5088	13	6.24829	7.20985	6.99436	6.79157	0.206507	-0.0437755	0.162732	-0.0424469	0.120285
	sp|Q9Y6C2|EMIL1_HUMAN	EMILIN1	EMILIN-1 OS=Homo sapiens OX=9606 GN=EMILIN1 PE=1 SV=3	2325	6	5.85073	6.75087	8.6062	5.27901	0.206458	0.350302	0.556761	-0.705109	-0.148348
	sp|P51636|CAV2_HUMAN	CAV2	Caveolin-2 OS=Homo sapiens OX=9606 GN=CAV2 PE=1 SV=2	5221	3	5.77985	6.66849	6.02537	6.84518	0.206327	-0.146311	0.0600158	0.184041	0.244057
	tr|Q5W125|Q5W125_HUMAN	NMRK1	Nicotinamide riboside kinase 1 OS=Homo sapiens OX=9606 GN=NMRK1 PE=1 SV=1	6624	4	5.73047	6.61062	5.814	6.28636	0.206132	-0.185255	0.0208776	0.112694	0.133571
	sp|Q8IWE4|DCNL3_HUMAN	DCUN1D3	DCN1-like protein 3 OS=Homo sapiens OX=9606 GN=DCUN1D3 PE=1 SV=1	833	6	4.3015	4.96031	4.77086	6.81534	0.205588	-0.056179	0.149409	0.514536	0.663946
	sp|P05165|PCCA_HUMAN	PCCA	Propionyl-CoA carboxylase alpha chain, mitochondrial OS=Homo sapiens OX=9606 GN=PCCA PE=1 SV=4	1104	19	6.00358	6.92302	7.38532	6.40641	0.205578	0.0932606	0.298838	-0.205144	0.0936942
	sp|Q14318-2|FKBP8_HUMAN	FKBP8	Isoform 2 of Peptidyl-prolyl cis-trans isomerase FKBP8 OS=Homo sapiens OX=9606 GN=FKBP8	697	13	5.67122	6.53919	6.1781	5.26005	0.205452	-0.0819472	0.123505	-0.232087	-0.108583
	sp|P45954|ACDSB_HUMAN	ACADSB	Short/branched chain specific acyl-CoA dehydrogenase, mitochondrial OS=Homo sapiens OX=9606 GN=ACADSB PE=1 SV=1	2693	8	6.22436	7.17637	7.2458	6.11191	0.205328	0.0138897	0.219218	-0.245522	-0.0263042
	sp|P28070|PSB4_HUMAN	PSMB4	Proteasome subunit beta type-4 OS=Homo sapiens OX=9606 GN=PSMB4 PE=1 SV=4	1644	10	6.20139	7.14867	7.14148	6.82597	0.205084	-0.00145311	0.203631	-0.0651873	0.138444
	sp|Q6ZW76|ANKS3_HUMAN	ANKS3	Ankyrin repeat and SAM domain-containing protein 3 OS=Homo sapiens OX=9606 GN=ANKS3 PE=1 SV=1	3017	4	6.39384	7.36984	7.39751	7.16191	0.204951	0.00540677	0.210357	-0.0466953	0.163662
	sp|P05556|ITB1_HUMAN	ITGB1	Integrin beta-1 OS=Homo sapiens OX=9606 GN=ITGB1 PE=1 SV=2	3150	25	6.3973	7.37332	7.07194	6.60519	0.204853	-0.060208	0.144645	-0.0985081	0.0461366
	sp|Q96GA3|LTV1_HUMAN	LTV1	Protein LTV1 homolog OS=Homo sapiens OX=9606 GN=LTV1 PE=1 SV=1	2755	7	6.66375	7.68009	5.87245	6.43481	0.204788	-0.387159	-0.182372	0.131933	-0.0504386
	sp|Q9HCL2|GPAT1_HUMAN	GPAM	Glycerol-3-phosphate acyltransferase 1, mitochondrial OS=Homo sapiens OX=9606 GN=GPAM PE=1 SV=3	1973	5	6.08584	7.01155	6.30238	6.07951	0.204276	-0.153836	0.0504392	-0.0519413	-0.00150215
	sp|P14649|MYL6B_HUMAN	MYL6B	Myosin light chain 6B OS=Homo sapiens OX=9606 GN=MYL6B PE=1 SV=1	1041	12	6.28794	7.24414	7.15128	6.26938	0.204226	-0.0186133	0.185612	-0.189877	-0.00426429
	sp|Q9NWQ8|PHAG1_HUMAN	PAG1	Phosphoprotein associated with glycosphingolipid-enriched microdomains 1 OS=Homo sapiens OX=9606 GN=PAG1 PE=1 SV=2	925	2	8.25601	9.50522	5.82062	5.89628	0.203276	-0.707548	-0.504272	0.0186338	-0.485638
	sp|Q96SB3|NEB2_HUMAN	PPP1R9B	Neurabin-2 OS=Homo sapiens OX=9606 GN=PPP1R9B PE=1 SV=3	2342	3	5.36628	6.17808	6.28278	6.19957	0.203236	0.0242445	0.227481	-0.0192337	0.208247
	sp|O95602|RPA1_HUMAN	POLR1A	DNA-directed RNA polymerase I subunit RPA1 OS=Homo sapiens OX=9606 GN=POLR1A PE=1 SV=2	321	15	6.17094	7.10446	6.22366	4.8348	0.203233	-0.190962	0.012271	-0.364306	-0.352035
	sp|Q9BQC6|RT63_HUMAN	MRPL57	Ribosomal protein 63, mitochondrial OS=Homo sapiens OX=9606 GN=MRPL57 PE=1 SV=1	4451	2	6.19038	7.12664	8.12409	5.65221	0.203193	0.188984	0.392177	-0.523391	-0.131214
	tr|A0A0A0MQS9|A0A0A0MQS9_HUMAN	LAMA4	Laminin subunit alpha-4 OS=Homo sapiens OX=9606 GN=LAMA4 PE=1 SV=1	466	8	5.47978	6.30802	6.17653	5.6396	0.203068	-0.0303907	0.172677	-0.131203	0.041474
	sp|Q9H7C4|SYNCI_HUMAN	SYNC	Syncoilin OS=Homo sapiens OX=9606 GN=SYNC PE=1 SV=3	4533	8	7.23131	8.32227	5.96364	6.18716	0.202719	-0.480784	-0.278065	0.0530846	-0.22498
	sp|P39060|COIA1_HUMAN	COL18A1	Collagen alpha-1(XVIII) chain OS=Homo sapiens OX=9606 GN=COL18A1 PE=1 SV=5	535	7	4.85102	5.58195	7.56028	5.97917	0.202479	0.437672	0.640151	-0.338496	0.301655
	sp|O76031|CLPX_HUMAN	CLPX	ATP-dependent Clp protease ATP-binding subunit clpX-like, mitochondrial OS=Homo sapiens OX=9606 GN=CLPX PE=1 SV=2	4	8	6.67816	7.6843	7.16778	6.4949	0.202464	-0.100387	0.102077	-0.142218	-0.0401415
	sp|Q6PJW8|CNST_HUMAN	CNST	Consortin OS=Homo sapiens OX=9606 GN=CNST PE=1 SV=3	5933	3	5.35181	6.15811	6.45487	5.9975	0.202461	0.0679016	0.270362	-0.106027	0.164335
	tr|A0A0C4DG86|A0A0C4DG86_HUMAN	SYBU	Syntabulin OS=Homo sapiens OX=9606 GN=SYBU PE=1 SV=1	3446	3	6.25659	7.1978	7.61213	6.98205	0.20218	0.0807449	0.282924	-0.12465	0.158275
	sp|Q8NCM8-2|DYHC2_HUMAN	DYNC2H1	Isoform 2 of Cytoplasmic dynein 2 heavy chain 1 OS=Homo sapiens OX=9606 GN=DYNC2H1	1914	13	5.37727	6.1834	5.46392	6.21519	0.201526	-0.178464	0.0230616	0.185862	0.208924
	sp|Q8WWH5|TRUB1_HUMAN	TRUB1	Probable tRNA pseudouridine synthase 1 OS=Homo sapiens OX=9606 GN=TRUB1 PE=1 SV=1	5831	2	4.05208	4.65788	4.15201	3.37269	0.201011	-0.165865	0.0351455	-0.29991	-0.264764
	sp|Q9Y3D3|RT16_HUMAN	MRPS16	28S ribosomal protein S16, mitochondrial OS=Homo sapiens OX=9606 GN=MRPS16 PE=1 SV=1	5173	3	6.55552	7.53522	7.5477	6.22076	0.20094	0.00238808	0.203328	-0.278947	-0.0756186
	sp|Q96LL9|DJC30_HUMAN	DNAJC30	DnaJ homolog subfamily C member 30, mitochondrial OS=Homo sapiens OX=9606 GN=DNAJC30 PE=1 SV=3	6098	3	5.79712	6.66327	6.18664	5.37471	0.200894	-0.107075	0.093819	-0.20297	-0.109151
	tr|A0A0A0MTJ9|A0A0A0MTJ9_HUMAN	NCEH1	Neutral cholesterol ester hydrolase 1 OS=Homo sapiens OX=9606 GN=NCEH1 PE=1 SV=1	6128	5	6.53077	7.50549	5.59245	6.31704	0.200693	-0.424467	-0.223774	0.175768	-0.0480055
	sp|Q13442|HAP28_HUMAN	PDAP1	28 kDa heat- and acid-stable phosphoprotein OS=Homo sapiens OX=9606 GN=PDAP1 PE=1 SV=1	3609	5	5.21491	5.99185	5.82017	5.83808	0.200361	-0.0419402	0.158421	0.00443186	0.162853
	sp|Q15052|ARHG6_HUMAN	ARHGEF6	Rho guanine nucleotide exchange factor 6 OS=Homo sapiens OX=9606 GN=ARHGEF6 PE=1 SV=2	4242	2	5.96697	6.85467	7.40583	7.78573	0.200089	0.111575	0.311664	0.0721702	0.383834
	sp|P61086|UBE2K_HUMAN	UBE2K	Ubiquitin-conjugating enzyme E2 K OS=Homo sapiens OX=9606 GN=UBE2K PE=1 SV=3	4201	6	2.26235	2.5989	2.35735	2.34188	0.200081	-0.140735	0.059346	-0.00949574	0.0498502
	sp|O75683|SURF6_HUMAN	SURF6	Surfeit locus protein 6 OS=Homo sapiens OX=9606 GN=SURF6 PE=1 SV=3	3575	5	7.39078	8.48993	6.54203	6.55285	0.200025	-0.376013	-0.175988	0.00238376	-0.173604
	tr|E9PNP3|E9PNP3_HUMAN	AAMDC	Mth938 domain-containing protein OS=Homo sapiens OX=9606 GN=AAMDC PE=1 SV=1	5124	3	6.48272	7.4453	6.95358	8.24723	0.199731	-0.0985747	0.101156	0.246153	0.347309
	sp|Q96EY7|PTCD3_HUMAN	PTCD3	Pentatricopeptide repeat domain-containing protein 3, mitochondrial OS=Homo sapiens OX=9606 GN=PTCD3 PE=1 SV=3	1394	9	6.60903	7.58982	7.62216	5.83525	0.199626	0.0061358	0.205762	-0.385406	-0.179645
	sp|Q92979|NEP1_HUMAN	EMG1	Ribosomal RNA small subunit methyltransferase NEP1 OS=Homo sapiens OX=9606 GN=EMG1 PE=1 SV=4	103	2	0.573326	0.658225	0.536604	0.617694	0.199224	-0.294723	-0.0954988	0.203034	0.107535
	sp|Q86Y82|STX12_HUMAN	STX12	Syntaxin-12 OS=Homo sapiens OX=9606 GN=STX12 PE=1 SV=1	3756	6	6.68368	7.673	6.9005	7.76348	0.199149	-0.15309	0.046059	0.170002	0.216061
	sp|Q01973|ROR1_HUMAN	ROR1	Inactive tyrosine-protein kinase transmembrane receptor ROR1 OS=Homo sapiens OX=9606 GN=ROR1 PE=1 SV=2	5760	3	5.6573	6.49352	5.65393	5.56198	0.198888	-0.199748	-0.000860081	-0.0236563	-0.0245164
	sp|P05023|AT1A1_HUMAN	ATP1A1	Sodium/potassium-transporting ATPase subunit alpha-1 OS=Homo sapiens OX=9606 GN=ATP1A1 PE=1 SV=1	534	14	6.11638	7.02036	6.9751	6.69342	0.198866	-0.00933077	0.189535	-0.0594696	0.130066
	sp|Q9H446|RWDD1_HUMAN	RWDD1	RWD domain-containing protein 1 OS=Homo sapiens OX=9606 GN=RWDD1 PE=1 SV=1	5246	3	6.50561	7.46561	7.16514	7.41983	0.198575	-0.0592653	0.13931	0.0503919	0.189702
	sp|Q96RU3|FNBP1_HUMAN	FNBP1	Formin-binding protein 1 OS=Homo sapiens OX=9606 GN=FNBP1 PE=1 SV=2	5070	7	5.68441	6.52033	7.11281	7.66848	0.197933	0.125475	0.323407	0.108522	0.431929
	sp|Q14847|LASP1_HUMAN	LASP1	LIM and SH3 domain protein 1 OS=Homo sapiens OX=9606 GN=LASP1 PE=1 SV=2	586	10	6.17686	7.08477	6.46754	7.691	0.197846	-0.131503	0.0663427	0.249954	0.316297
	sp|Q9BXJ1-2|C1QT1_HUMAN	C1QTNF1	Isoform 2 of Complement C1q tumor necrosis factor-related protein 1 OS=Homo sapiens OX=9606 GN=C1QTNF1	916	2	5.36986	6.15885	10.162	2.22089	0.197777	0.722453	0.920229	-2.19397	-1.27374
	sp|Q9UJ68|MSRA_HUMAN	MSRA	Mitochondrial peptide methionine sulfoxide reductase OS=Homo sapiens OX=9606 GN=MSRA PE=1 SV=1	4748	2	5.41322	6.20767	6.48378	5.65688	0.197566	0.0627825	0.260348	-0.196829	0.0635192
	sp|Q8IVM0|CCD50_HUMAN	CCDC50	Coiled-coil domain-containing protein 50 OS=Homo sapiens OX=9606 GN=CCDC50 PE=1 SV=1	430	10	6.36345	7.29682	6.72125	7.15076	0.197459	-0.118539	0.0789208	0.0893674	0.168288
	tr|J3KQN4|J3KQN4_HUMAN	RPL36A	60S ribosomal protein L36a OS=Homo sapiens OX=9606 GN=RPL36A PE=1 SV=1	4249	5	6.80833	7.80617	6.86286	6.14679	0.197313	-0.185803	0.01151	-0.158978	-0.147468
	sp|Q9BZE1|RM37_HUMAN	MRPL37	39S ribosomal protein L37, mitochondrial OS=Homo sapiens OX=9606 GN=MRPL37 PE=1 SV=2	2289	12	5.81132	6.65992	8.16904	5.25814	0.19664	0.294662	0.491302	-0.635615	-0.144313
	sp|Q86UB9|TM135_HUMAN	TMEM135	Transmembrane protein 135 OS=Homo sapiens OX=9606 GN=TMEM135 PE=2 SV=2	4623	2	6.83579	7.83396	7.64599	5.05743	0.196634	-0.0350378	0.161597	-0.596301	-0.434704
	sp|Q9NQS1|AVEN_HUMAN	AVEN	Cell death regulator Aven OS=Homo sapiens OX=9606 GN=AVEN PE=1 SV=1	2067	6	6.43429	7.3721	7.14586	6.77435	0.196294	-0.044968	0.151326	-0.0770245	0.0743016
	sp|Q9NWX5|ASB6_HUMAN	ASB6	Ankyrin repeat and SOCS box protein 6 OS=Homo sapiens OX=9606 GN=ASB6 PE=1 SV=1	6039	2	6.78858	7.77592	6.3141	6.4466	0.195903	-0.300437	-0.104534	0.0299629	-0.074571
	sp|Q9C0B5|ZDHC5_HUMAN	ZDHHC5	Palmitoyltransferase ZDHHC5 OS=Homo sapiens OX=9606 GN=ZDHHC5 PE=1 SV=2	2531	5	6.20634	7.10801	6.59076	7.02015	0.195704	-0.109001	0.0867029	0.091058	0.177761
	sp|Q96GC5|RM48_HUMAN	MRPL48	39S ribosomal protein L48, mitochondrial OS=Homo sapiens OX=9606 GN=MRPL48 PE=1 SV=2	6504	3	5.30305	6.07335	7.11035	4.53979	0.195668	0.227429	0.423097	-0.647295	-0.224198
	sp|O14949|QCR8_HUMAN	UQCRQ	Cytochrome b-c1 complex subunit 8 OS=Homo sapiens OX=9606 GN=UQCRQ PE=1 SV=4	3095	5	6.19081	7.08964	6.86181	6.84111	0.195584	-0.0471225	0.148461	-0.00435875	0.144102
	sp|O75911|DHRS3_HUMAN	DHRS3	Short-chain dehydrogenase/reductase 3 OS=Homo sapiens OX=9606 GN=DHRS3 PE=1 SV=2	520	5	5.97475	6.84147	7.18988	5.74718	0.195428	0.07166	0.267088	-0.323114	-0.0560262
	sp|Q9BW30|TPPP3_HUMAN	TPPP3	Tubulin polymerization-promoting protein family member 3 OS=Homo sapiens OX=9606 GN=TPPP3 PE=1 SV=1	4593	2	6.39858	7.32562	4.61995	15.5538	0.195199	-0.665075	-0.469876	1.75132	1.28144
	sp|P54577|SYYC_HUMAN	YARS	Tyrosine--tRNA ligase, cytoplasmic OS=Homo sapiens OX=9606 GN=YARS PE=1 SV=4	1134	22	6.18254	7.07747	6.23621	6.49544	0.195034	-0.182565	0.0124691	0.0587585	0.0712276
	sp|P08243|ASNS_HUMAN	ASNS	Asparagine synthetase [glutamine-hydrolyzing] OS=Homo sapiens OX=9606 GN=ASNS PE=1 SV=4	826	17	6.83027	7.81888	5.79238	6.94627	0.195019	-0.432806	-0.237787	0.262083	0.0242962
	sp|O95900|TRUB2_HUMAN	TRUB2	Mitochondrial mRNA pseudouridine synthase TRUB2 OS=Homo sapiens OX=9606 GN=TRUB2 PE=1 SV=1	487	3	4.64099	5.31197	5.27205	4.2406	0.194815	-0.0108839	0.183932	-0.314095	-0.130163
	tr|A0A1B0GUI1|A0A1B0GUI1_HUMAN	RALGAPA1	Ral GTPase-activating protein subunit alpha-1 OS=Homo sapiens OX=9606 GN=RALGAPA1 PE=1 SV=1	2312	9	6.29412	7.20374	6.22402	5.96629	0.19474	-0.210898	-0.016158	-0.0610146	-0.0771726
	sp|Q8TDN6|BRX1_HUMAN	BRIX1	Ribosome biogenesis protein BRX1 homolog OS=Homo sapiens OX=9606 GN=BRIX1 PE=1 SV=2	3280	9	6.28973	7.19869	5.88612	6.10119	0.194736	-0.290419	-0.0956831	0.0517737	-0.0439094
	sp|Q04917|1433F_HUMAN	YWHAH	14-3-3 protein eta OS=Homo sapiens OX=9606 GN=YWHAH PE=1 SV=4	177	13	6.68185	7.64722	6.76878	7.4783	0.194689	-0.176039	0.0186497	0.143813	0.162463
	sp|Q9BYV8|CEP41_HUMAN	CEP41	Centrosomal protein of 41 kDa OS=Homo sapiens OX=9606 GN=CEP41 PE=1 SV=1	5418	2	6.26032	7.16416	7.36278	7.77494	0.194563	0.039452	0.234015	0.0785813	0.312596
	sp|Q8NFW8|NEUA_HUMAN	CMAS	N-acylneuraminate cytidylyltransferase OS=Homo sapiens OX=9606 GN=CMAS PE=1 SV=2	2910	10	6.19666	7.09122	6.47703	7.00582	0.194543	-0.130702	0.0638409	0.113223	0.177064
	sp|Q9BTE6-3|AASD1_HUMAN	AARSD1	Isoform 3 of Alanyl-tRNA editing protein Aarsd1 OS=Homo sapiens OX=9606 GN=AARSD1	2119	9	6.3401	7.25482	6.69223	6.42898	0.194434	-0.116454	0.0779803	-0.0578968	0.0200835
	sp|Q07092|COGA1_HUMAN	COL16A1	Collagen alpha-1(XVI) chain OS=Homo sapiens OX=9606 GN=COL16A1 PE=1 SV=2	1391	3	6.28454	7.19088	7.96948	5.87843	0.194361	0.148319	0.342679	-0.439057	-0.0963775
	sp|Q5T653|RM02_HUMAN	MRPL2	39S ribosomal protein L2, mitochondrial OS=Homo sapiens OX=9606 GN=MRPL2 PE=1 SV=2	4707	5	6.21056	7.10586	8.30501	5.11031	0.194285	0.224974	0.419259	-0.70057	-0.281311
	sp|Q9H7E2-3|TDRD3_HUMAN	TDRD3	Isoform 3 of Tudor domain-containing protein 3 OS=Homo sapiens OX=9606 GN=TDRD3	4981	4	6.80873	7.78878	6.36476	7.18306	0.194012	-0.291293	-0.0972811	0.174493	0.0772121
	sp|Q9H7B2|RPF2_HUMAN	RPF2	Ribosome production factor 2 homolog OS=Homo sapiens OX=9606 GN=RPF2 PE=1 SV=2	3353	6	6.65867	7.61232	6.17213	6.18639	0.193102	-0.302568	-0.109466	0.00332972	-0.106136
	sp|P62834|RAP1A_HUMAN	RAP1A	Ras-related protein Rap-1A OS=Homo sapiens OX=9606 GN=RAP1A PE=1 SV=1	4281	9	2.3719	2.71136	2.62175	2.89729	0.192973	-0.0484856	0.144488	0.144174	0.288661
	sp|P36404|ARL2_HUMAN	ARL2	ADP-ribosylation factor-like protein 2 OS=Homo sapiens OX=9606 GN=ARL2 PE=1 SV=4	4916	6	5.03453	5.75389	5.60337	5.12467	0.192681	-0.0382437	0.154437	-0.128835	0.025602
	sp|O43818|U3IP2_HUMAN	RRP9	U3 small nucleolar RNA-interacting protein 2 OS=Homo sapiens OX=9606 GN=RRP9 PE=1 SV=1	1148	4	7.03825	8.04353	6.18794	5.94803	0.192611	-0.378369	-0.185758	-0.0570489	-0.242807
	sp|Q8N9N8|EIF1A_HUMAN	EIF1AD	Probable RNA-binding protein EIF1AD OS=Homo sapiens OX=9606 GN=EIF1AD PE=1 SV=1	976	2	6.52781	7.45772	7.02683	7.94123	0.192135	-0.0858607	0.106274	0.176488	0.282763
	sp|Q9H9P8|L2HDH_HUMAN	L2HGDH	L-2-hydroxyglutarate dehydrogenase, mitochondrial OS=Homo sapiens OX=9606 GN=L2HGDH PE=1 SV=3	588	6	5.75633	6.57525	5.82648	5.07834	0.191896	-0.17442	0.0174761	-0.19827	-0.180794
	sp|Q13405|RM49_HUMAN	MRPL49	39S ribosomal protein L49, mitochondrial OS=Homo sapiens OX=9606 GN=MRPL49 PE=1 SV=1	4329	5	5.7992	6.62386	7.68006	5.09268	0.191819	0.213445	0.405264	-0.592691	-0.187427
	sp|O43776|SYNC_HUMAN	NARS	Asparagine--tRNA ligase, cytoplasmic OS=Homo sapiens OX=9606 GN=NARS PE=1 SV=1	4322	17	6.69908	7.65138	6.71278	6.57816	0.191756	-0.188808	0.00294738	-0.0292281	-0.0262807
	sp|Q86X10-3|RLGPB_HUMAN	RALGAPB	Isoform 3 of Ral GTPase-activating protein subunit beta OS=Homo sapiens OX=9606 GN=RALGAPB	756	7	2.44104	2.7879	2.58686	2.23357	0.191681	-0.107977	0.0837042	-0.211852	-0.128148
	sp|Q9NTJ4-4|MA2C1_HUMAN	MAN2C1	Isoform 4 of Alpha-mannosidase 2C1 OS=Homo sapiens OX=9606 GN=MAN2C1	986	9	4.38269	5.00426	4.80351	4.41911	0.19134	-0.0590683	0.132272	-0.120333	0.0119387
	sp|Q92743|HTRA1_HUMAN	HTRA1	Serine protease HTRA1 OS=Homo sapiens OX=9606 GN=HTRA1 PE=1 SV=1	3372	4	6.95592	7.94219	6.74881	4.67254	0.191295	-0.234904	-0.0436089	-0.530425	-0.574033
	sp|Q9Y5Z4|HEBP2_HUMAN	HEBP2	Heme-binding protein 2 OS=Homo sapiens OX=9606 GN=HEBP2 PE=1 SV=1	1021	7	5.82887	6.65453	7.4052	6.72227	0.191121	0.154203	0.345323	-0.13959	0.205733
	sp|P78316|NOP14_HUMAN	NOP14	Nucleolar protein 14 OS=Homo sapiens OX=9606 GN=NOP14 PE=1 SV=3	3361	4	6.72479	7.67652	6.13226	6.63491	0.190965	-0.324035	-0.13307	0.113659	-0.0194116
	sp|P21399|ACOC_HUMAN	ACO1	Cytoplasmic aconitate hydratase OS=Homo sapiens OX=9606 GN=ACO1 PE=1 SV=3	2844	18	6.77295	7.7303	6.08282	6.07789	0.190741	-0.345784	-0.155043	-0.00117014	-0.156213
	sp|Q6DKK2|TTC19_HUMAN	TTC19	Tetratricopeptide repeat protein 19, mitochondrial OS=Homo sapiens OX=9606 GN=TTC19 PE=1 SV=4	2075	3	6.76706	7.72312	7.58678	5.50439	0.190655	-0.025697	0.164958	-0.462905	-0.297946
	sp|Q16204|CCDC6_HUMAN	CCDC6	Coiled-coil domain-containing protein 6 OS=Homo sapiens OX=9606 GN=CCDC6 PE=1 SV=2	416	10	4.93975	5.63648	6.0757	5.56111	0.190358	0.108256	0.298614	-0.127679	0.170936
	sp|Q9P291|ARMX1_HUMAN	ARMCX1	Armadillo repeat-containing X-linked protein 1 OS=Homo sapiens OX=9606 GN=ARMCX1 PE=1 SV=1	1788	16	6.14127	7.00631	7.33068	6.23834	0.190117	0.0652935	0.255411	-0.232787	0.022624
	sp|Q6PI48|SYDM_HUMAN	DARS2	Aspartate--tRNA ligase, mitochondrial OS=Homo sapiens OX=9606 GN=DARS2 PE=1 SV=1	1589	7	7.08674	8.08439	6.783	6.89427	0.190017	-0.253217	-0.0632	0.023475	-0.039725
	sp|Q8IZP0|ABI1_HUMAN	ABI1	Abl interactor 1 OS=Homo sapiens OX=9606 GN=ABI1 PE=1 SV=4	1937	4	6.65283	7.58918	7.01099	7.60403	0.189976	-0.114326	0.07565	0.117148	0.192798
	sp|P04406|G3P_HUMAN	GAPDH	Glyceraldehyde-3-phosphate dehydrogenase OS=Homo sapiens OX=9606 GN=GAPDH PE=1 SV=3	191	30	6.37369	7.26995	7.59041	5.97923	0.189816	0.062232	0.252049	-0.344218	-0.0921699
	sp|Q9NXH9|TRM1_HUMAN	TRMT1	tRNA (guanine(26)-N(2))-dimethyltransferase OS=Homo sapiens OX=9606 GN=TRMT1 PE=1 SV=1	4053	7	6.46768	7.37671	5.91729	5.83831	0.189729	-0.318042	-0.128313	-0.0193862	-0.147699
	sp|Q9NP81|SYSM_HUMAN	SARS2	Serine--tRNA ligase, mitochondrial OS=Homo sapiens OX=9606 GN=SARS2 PE=1 SV=1	544	3	5.89236	6.71934	6.60295	6.45304	0.189474	-0.0252095	0.164264	-0.0331318	0.131133
	sp|Q8NBK3|SUMF1_HUMAN	SUMF1	Formylglycine-generating enzyme OS=Homo sapiens OX=9606 GN=SUMF1 PE=1 SV=3	4477	3	5.21343	5.9432	6.397	5.57099	0.189008	0.106156	0.295164	-0.199463	0.0957005
	sp|Q9HB40|RISC_HUMAN	SCPEP1	Retinoid-inducible serine carboxypeptidase OS=Homo sapiens OX=9606 GN=SCPEP1 PE=1 SV=1	1017	4	5.36339	6.11241	7.46884	6.05546	0.188597	0.289144	0.477741	-0.302647	0.175093
	sp|Q8NBF6|AVL9_HUMAN	AVL9	Late secretory pathway protein AVL9 homolog OS=Homo sapiens OX=9606 GN=AVL9 PE=1 SV=1	2904	4	3.81275	4.34515	3.3671	3.03787	0.188575	-0.367902	-0.179327	-0.148447	-0.327774
	sp|Q86WX3|AROS_HUMAN	RPS19BP1	Active regulator of SIRT1 OS=Homo sapiens OX=9606 GN=RPS19BP1 PE=1 SV=1	5438	2	7.00725	7.98568	6.88339	6.86044	0.188568	-0.214296	-0.0257284	-0.0048192	-0.0305476
	sp|Q96CX6|LRC58_HUMAN	LRRC58	Leucine-rich repeat-containing protein 58 OS=Homo sapiens OX=9606 GN=LRRC58 PE=1 SV=2	5484	3	4.47969	5.10453	8.97937	6.56844	0.188378	0.814837	1.00321	-0.451062	0.552153
	sp|Q6YHU6|THADA_HUMAN	THADA	Thyroid adenoma-associated protein OS=Homo sapiens OX=9606 GN=THADA PE=1 SV=1	269	6	5.52232	6.29252	5.63901	6.14156	0.188363	-0.158197	0.0301653	0.123166	0.153331
	sp|Q7L311|ARMX2_HUMAN	ARMCX2	Armadillo repeat-containing X-linked protein 2 OS=Homo sapiens OX=9606 GN=ARMCX2 PE=2 SV=1	538	13	6.15674	7.01457	7.83335	5.92388	0.188187	0.159276	0.347463	-0.403089	-0.0556254
	sp|Q9UK76|JUPI1_HUMAN	JPT1	Jupiter microtubule associated homolog 1 OS=Homo sapiens OX=9606 GN=JPT1 PE=1 SV=3	4564	3	5.58685	6.36363	6.30218	6.7517	0.187816	-0.0139986	0.173818	0.0993987	0.273217
	sp|Q5VZK9|CARL1_HUMAN	CARMIL1	F-actin-uncapping protein LRRC16A OS=Homo sapiens OX=9606 GN=CARMIL1 PE=1 SV=1	3798	4	5.63634	6.41846	4.97773	6.87601	0.187468	-0.366739	-0.179271	0.466083	0.286812
	sp|O00767|ACOD_HUMAN	SCD	Acyl-CoA desaturase OS=Homo sapiens OX=9606 GN=SCD PE=1 SV=2	3633	4	7.12075	8.10855	7.29809	5.2618	0.187415	-0.151925	0.0354898	-0.471963	-0.436473
	sp|Q8NC51|PAIRB_HUMAN	SERBP1	Plasminogen activator inhibitor 1 RNA-binding protein OS=Homo sapiens OX=9606 GN=SERBP1 PE=1 SV=2	3684	14	5.85911	6.67031	5.824	5.54648	0.187072	-0.195743	-0.00867077	-0.0704383	-0.0791091
	sp|Q96E11|RRFM_HUMAN	MRRF	Ribosome-recycling factor, mitochondrial OS=Homo sapiens OX=9606 GN=MRRF PE=1 SV=1	5084	5	5.9271	6.74756	7.28227	6.08739	0.187039	0.110023	0.297062	-0.258564	0.0384974
	tr|B4DL54|B4DL54_HUMAN	CHURC1-FNTB	Protein farnesyltransferase subunit beta OS=Homo sapiens OX=9606 GN=CHURC1-FNTB PE=2 SV=1	883	4	5.54506	6.31248	5.84094	6.10352	0.187004	-0.112006	0.0749983	0.0634401	0.138438
	sp|Q9NW81-4|DMAC2_HUMAN	DMAC2	Isoform 4 of Distal membrane-arm assembly complex protein 2 OS=Homo sapiens OX=9606 GN=DMAC2	4277	3	6.5626	7.47082	8.01872	4.63283	0.187	0.102106	0.289106	-0.791481	-0.502375
	sp|Q8N0Z6|TTC5_HUMAN	TTC5	Tetratricopeptide repeat protein 5 OS=Homo sapiens OX=9606 GN=TTC5 PE=1 SV=2	2560	4	6.74673	7.67914	7.06235	7.17412	0.186756	-0.120796	0.0659602	0.0226525	0.0886127
	sp|Q96IU4|ABHEB_HUMAN	ABHD14B	Protein ABHD14B OS=Homo sapiens OX=9606 GN=ABHD14B PE=1 SV=1	2839	11	5.82247	6.6266	7.41562	7.64391	0.186637	0.162297	0.348935	0.0437438	0.392679
	sp|O94915|FRYL_HUMAN	FRYL	Protein furry homolog-like OS=Homo sapiens OX=9606 GN=FRYL PE=1 SV=2	1827	5	6.70653	7.62982	6.53716	6.3207	0.186083	-0.222985	-0.0369021	-0.04858	-0.0854822
	sp|O43464|HTRA2_HUMAN	HTRA2	Serine protease HTRA2, mitochondrial OS=Homo sapiens OX=9606 GN=HTRA2 PE=1 SV=2	5010	6	5.8733	6.68133	6.69316	6.82601	0.185965	0.00255254	0.188517	0.0283529	0.21687
	sp|O00161|SNP23_HUMAN	SNAP23	Synaptosomal-associated protein 23 OS=Homo sapiens OX=9606 GN=SNAP23 PE=1 SV=1	4080	9	5.90978	6.72178	6.757	7.50702	0.18574	0.00753988	0.19328	0.151856	0.345137
	sp|Q6NW29|RWDD4_HUMAN	RWDD4	RWD domain-containing protein 4 OS=Homo sapiens OX=9606 GN=RWDD4 PE=1 SV=3	4922	3	6.42637	7.30865	7.36922	7.28979	0.185601	0.0119073	0.197508	-0.015634	0.181874
	sp|O43325|LYRM1_HUMAN	LYRM1	LYR motif-containing protein 1 OS=Homo sapiens OX=9606 GN=LYRM1 PE=2 SV=1	5951	3	6.4825	7.37245	7.34197	7.19165	0.185594	-0.00597822	0.179616	-0.0298428	0.149773
	sp|O43157|PLXB1_HUMAN	PLXNB1	Plexin-B1 OS=Homo sapiens OX=9606 GN=PLXNB1 PE=1 SV=3	1684	7	6.13151	6.97295	7.25877	8.567	0.185527	0.057956	0.243483	0.239065	0.482548
	sp|P41214|EIF2D_HUMAN	EIF2D	Eukaryotic translation initiation factor 2D OS=Homo sapiens OX=9606 GN=EIF2D PE=1 SV=3	2438	11	6.32994	7.19856	6.53672	7.42244	0.185516	-0.139141	0.0463743	0.183326	0.2297
	sp|O43896|KIF1C_HUMAN	KIF1C	Kinesin-like protein KIF1C OS=Homo sapiens OX=9606 GN=KIF1C PE=1 SV=3	295	7	6.41734	7.29771	6.68943	7.13424	0.185469	-0.125561	0.0599082	0.0928771	0.152785
	sp|Q9H254|SPTN4_HUMAN	SPTBN4	Spectrin beta chain, non-erythrocytic 4 OS=Homo sapiens OX=9606 GN=SPTBN4 PE=1 SV=2	994	4	5.42205	6.16567	6.03252	6.83432	0.185418	-0.0314949	0.153923	0.180037	0.33396
	sp|O00410-3|IPO5_HUMAN	IPO5	Isoform 3 of Importin-5 OS=Homo sapiens OX=9606 GN=IPO5	2724	22	6.10409	6.94082	5.87676	6.11414	0.18533	-0.240084	-0.0547545	0.0571286	0.00237414
	sp|Q14C86-6|GAPD1_HUMAN	GAPVD1	Isoform 6 of GTPase-activating protein and VPS9 domain-containing protein 1 OS=Homo sapiens OX=9606 GN=GAPVD1	2879	10	5.54918	6.30916	5.17196	5.4165	0.185173	-0.286738	-0.101564	0.0666494	-0.034915
	sp|Q9P2J5|SYLC_HUMAN	LARS	Leucine--tRNA ligase, cytoplasmic OS=Homo sapiens OX=9606 GN=LARS PE=1 SV=2	2272	26	6.60267	7.50664	6.69383	6.57751	0.185118	-0.165335	0.0197831	-0.0252904	-0.00550728
	sp|P24386|RAE1_HUMAN	CHM	Rab proteins geranylgeranyltransferase component A 1 OS=Homo sapiens OX=9606 GN=CHM PE=1 SV=3	1646	5	6.81838	7.75109	7.10385	5.92596	0.18497	-0.125798	0.0591717	-0.261554	-0.202382
	sp|E9PAV3|NACAM_HUMAN	NACA	Nascent polypeptide-associated complex subunit alpha, muscle-specific form OS=Homo sapiens OX=9606 GN=NACA PE=1 SV=1	3879	4	6.79963	7.72805	6.56821	6.53129	0.184647	-0.234604	-0.0499567	-0.00813229	-0.058089
	sp|Q8TCS8|PNPT1_HUMAN	PNPT1	Polyribonucleotide nucleotidyltransferase 1, mitochondrial OS=Homo sapiens OX=9606 GN=PNPT1 PE=1 SV=2	2173	22	5.51155	6.26353	5.46551	6.25278	0.184517	-0.196621	-0.0121037	0.194144	0.18204
	sp|Q9H974-4|QTRT2_HUMAN	QTRT2	Isoform 4 of Queuine tRNA-ribosyltransferase accessory subunit 2 OS=Homo sapiens OX=9606 GN=QTRT2	6358	3	6.58299	7.4809	7.40526	6.68837	0.18447	-0.0146605	0.169809	-0.146896	0.0229135
	tr|H3BSW6|H3BSW6_HUMAN	CTU2	Cytoplasmic tRNA 2-thiolation protein 2 OS=Homo sapiens OX=9606 GN=CTU2 PE=1 SV=1	3050	2	6.48926	7.37325	7.32456	7.23255	0.184246	-0.00955923	0.174687	-0.018237	0.15645
	sp|P49406|RM19_HUMAN	MRPL19	39S ribosomal protein L19, mitochondrial OS=Homo sapiens OX=9606 GN=MRPL19 PE=1 SV=2	3540	8	5.86769	6.66647	7.94542	5.33558	0.184131	0.253199	0.43733	-0.574478	-0.137148
	sp|Q9Y281|COF2_HUMAN	CFL2	Cofilin-2 OS=Homo sapiens OX=9606 GN=CFL2 PE=1 SV=1	2918	7	5.56241	6.31903	6.65234	7.5489	0.183992	0.0741592	0.258151	0.182406	0.440557
	sp|Q9Y4H2|IRS2_HUMAN	IRS2	Insulin receptor substrate 2 OS=Homo sapiens OX=9606 GN=IRS2 PE=1 SV=2	4866	4	7.27437	8.26298	6.85403	6.1319	0.18384	-0.269709	-0.0858691	-0.16062	-0.246489
	sp|Q9HD33|RM47_HUMAN	MRPL47	39S ribosomal protein L47, mitochondrial OS=Homo sapiens OX=9606 GN=MRPL47 PE=1 SV=2	5280	9	4.12613	4.68675	5.68093	3.90341	0.1838	0.277538	0.461337	-0.541394	-0.0800561
	sp|Q15785|TOM34_HUMAN	TOMM34	Mitochondrial import receptor subunit TOM34 OS=Homo sapiens OX=9606 GN=TOMM34 PE=1 SV=2	2017	8	5.41571	6.15126	5.74481	5.82468	0.183733	-0.0986236	0.0851096	0.0199184	0.105028
	sp|Q969S3|ZN622_HUMAN	ZNF622	Zinc finger protein 622 OS=Homo sapiens OX=9606 GN=ZNF622 PE=1 SV=1	1925	5	6.39525	7.26384	7.44482	6.28773	0.18373	0.0355059	0.219236	-0.243697	-0.0244611
	sp|P50747|BPL1_HUMAN	HLCS	Biotin--protein ligase OS=Homo sapiens OX=9606 GN=HLCS PE=1 SV=1	5090	6	6.4623	7.33975	7.42506	7.02178	0.183683	0.0166714	0.200355	-0.0805649	0.11979
	sp|Q8TB52|FBX30_HUMAN	FBXO30	F-box only protein 30 OS=Homo sapiens OX=9606 GN=FBXO30 PE=1 SV=3	3363	4	6.42395	7.29575	6.85625	6.39401	0.183595	-0.0896359	0.093959	-0.100698	-0.00673928
	sp|L0R6Q1|S35U4_HUMAN	SLC35A4	SLC35A4 upstream open reading frame protein OS=Homo sapiens OX=9606 GN=SLC35A4 PE=3 SV=1	4404	7	7.3304	8.32227	6.79752	6.12845	0.183086	-0.29197	-0.108884	-0.149487	-0.258371
	sp|Q6P3X3|TTC27_HUMAN	TTC27	Tetratricopeptide repeat protein 27 OS=Homo sapiens OX=9606 GN=TTC27 PE=1 SV=1	4692	2	6.53617	7.42024	5.72873	6.86287	0.18302	-0.373251	-0.190231	0.260596	0.0703655
	sp|O00566|MPP10_HUMAN	MPHOSPH10	U3 small nucleolar ribonucleoprotein protein MPP10 OS=Homo sapiens OX=9606 GN=MPHOSPH10 PE=1 SV=2	2765	4	6.41403	7.27967	6.05454	6.56949	0.182643	-0.265858	-0.0832142	0.117764	0.0345499
	sp|O00142-6|KITM_HUMAN	TK2	Isoform 6 of Thymidine kinase 2, mitochondrial OS=Homo sapiens OX=9606 GN=TK2	5654	5	6.3279	7.18184	7.34581	7.69794	0.182625	0.0325691	0.215194	0.0675515	0.282746
	sp|O75688|PPM1B_HUMAN	PPM1B	Protein phosphatase 1B OS=Homo sapiens OX=9606 GN=PPM1B PE=1 SV=1	1905	6	5.18064	5.87952	5.68375	6.1172	0.182566	-0.0488536	0.133713	0.106028	0.23974
	sp|Q5JSH3|WDR44_HUMAN	WDR44	WD repeat-containing protein 44 OS=Homo sapiens OX=9606 GN=WDR44 PE=1 SV=1	3203	10	6.26985	7.11455	6.64062	7.0951	0.18234	-0.0994546	0.0828855	0.0955048	0.17839
	tr|S4R2Z7|S4R2Z7_HUMAN	MRPL42	39S ribosomal protein L42, mitochondrial OS=Homo sapiens OX=9606 GN=MRPL42 PE=1 SV=1	6811	4	4.86462	5.51982	6.49612	4.4707	0.182294	0.234957	0.417251	-0.53908	-0.121829
	sp|Q9P015|RM15_HUMAN	MRPL15	39S ribosomal protein L15, mitochondrial OS=Homo sapiens OX=9606 GN=MRPL15 PE=1 SV=1	4397	9	3.9366	4.46656	5.34231	3.61472	0.182215	0.258299	0.440514	-0.563581	-0.123067
	sp|P23458|JAK1_HUMAN	JAK1	Tyrosine-protein kinase JAK1 OS=Homo sapiens OX=9606 GN=JAK1 PE=1 SV=2	2480	11	5.8143	6.59695	6.11527	7.15336	0.182194	-0.109383	0.0728111	0.226205	0.299017
	sp|P29558-2|RBMS1_HUMAN	RBMS1	Isoform 2 of RNA-binding motif, single-stranded-interacting protein 1 OS=Homo sapiens OX=9606 GN=RBMS1	2276	2	6.25852	7.09998	7.4416	7.63747	0.181993	0.0677979	0.249791	0.0374826	0.287273
	sp|Q9BZL4|PP12C_HUMAN	PPP1R12C	Protein phosphatase 1 regulatory subunit 12C OS=Homo sapiens OX=9606 GN=PPP1R12C PE=1 SV=1	117	12	5.48828	6.22592	6.40093	6.6395	0.181931	0.0399953	0.221927	0.052792	0.274719
	sp|Q9BUK6|MSTO1_HUMAN	MSTO1	Protein misato homolog 1 OS=Homo sapiens OX=9606 GN=MSTO1 PE=1 SV=1	153	2	6.35537	7.2088	7.918	5.89975	0.181782	0.135377	0.317159	-0.424483	-0.107324
	tr|I3L0E3|I3L0E3_HUMAN	hCG_1984214	HCG1984214, isoform CRA_a OS=Homo sapiens OX=9606 GN=hCG_1984214 PE=4 SV=1	5860	5	6.56346	7.44414	7.72904	5.80151	0.181649	0.0541834	0.235833	-0.41386	-0.178027
	sp|Q92562|FIG4_HUMAN	FIG4	Polyphosphoinositide phosphatase OS=Homo sapiens OX=9606 GN=FIG4 PE=1 SV=1	4070	8	5.93256	6.72857	6.11876	6.1715	0.181645	-0.137061	0.0445846	0.0123815	0.056966
	sp|Q5H8A4|PIGG_HUMAN	PIGG	GPI ethanolamine phosphate transferase 2 OS=Homo sapiens OX=9606 GN=PIGG PE=1 SV=1	4144	2	6.49817	7.36751	6.06392	6.14981	0.181144	-0.280928	-0.0997843	0.0202919	-0.0794924
	sp|Q15046|SYK_HUMAN	KARS	Lysine--tRNA ligase OS=Homo sapiens OX=9606 GN=KARS PE=1 SV=3	2860	15	6.58535	7.46599	6.9081	6.35236	0.181074	-0.112045	0.0690292	-0.120998	-0.0519686
	sp|Q8N142|PURA1_HUMAN	ADSSL1	Adenylosuccinate synthetase isozyme 1 OS=Homo sapiens OX=9606 GN=ADSSL1 PE=1 SV=1	1537	5	4.04337	4.58308	5.88386	3.90883	0.180759	0.360447	0.541207	-0.590025	-0.0488184
	sp|Q8WVM0|TFB1M_HUMAN	TFB1M	Dimethyladenosine transferase 1, mitochondrial OS=Homo sapiens OX=9606 GN=TFB1M PE=1 SV=1	5340	4	6.26164	7.09653	6.7544	5.20154	0.180573	-0.0712858	0.109287	-0.376887	-0.2676
	sp|Q8N2G8|GHDC_HUMAN	GHDC	GH3 domain-containing protein OS=Homo sapiens OX=9606 GN=GHDC PE=1 SV=2	2905	4	6.76345	7.66421	6.82463	7.88461	0.180376	-0.167385	0.0129915	0.208287	0.221278
	sp|P09497-2|CLCB_HUMAN	CLTB	Isoform Non-brain of Clathrin light chain B OS=Homo sapiens OX=9606 GN=CLTB	2597	9	6.17411	6.99464	6.72023	7.44907	0.180019	-0.0577388	0.12228	0.148548	0.270828
	tr|A0A0C4DGQ5|A0A0C4DGQ5_HUMAN	CAPNS1	Calpain small subunit 1 OS=Homo sapiens OX=9606 GN=CAPNS1 PE=1 SV=1	6016	8	5.7522	6.51652	6.30272	6.85918	0.179988	-0.0481272	0.131861	0.12206	0.253921
	sp|P41250|GARS_HUMAN	GARS	Glycine--tRNA ligase OS=Homo sapiens OX=9606 GN=GARS PE=1 SV=3	975	24	5.76242	6.5267	5.67301	6.52787	0.17968	-0.202238	-0.0225583	0.202498	0.179939
	sp|Q07343|PDE4B_HUMAN	PDE4B	cAMP-specific 3',5'-cyclic phosphodiesterase 4B OS=Homo sapiens OX=9606 GN=PDE4B PE=1 SV=1	2774	2	6.22306	7.04793	6.59911	5.7445	0.179576	-0.0949281	0.084648	-0.200092	-0.115444
	sp|Q6ICL3-4|TNG2_HUMAN	TANGO2	Isoform 4 of Transport and Golgi organization protein 2 homolog OS=Homo sapiens OX=9606 GN=TANGO2	4051	2	6.00718	6.8026	7.59858	5.40773	0.1794	0.159644	0.339044	-0.490708	-0.151664
	sp|Q8NFA0|UBP32_HUMAN	USP32	Ubiquitin carboxyl-terminal hydrolase 32 OS=Homo sapiens OX=9606 GN=USP32 PE=1 SV=1	3498	5	7.00524	7.932	6.98186	6.64855	0.17925	-0.184074	-0.00482408	-0.0705703	-0.0753943
	sp|O43741|AAKB2_HUMAN	PRKAB2	5'-AMP-activated protein kinase subunit beta-2 OS=Homo sapiens OX=9606 GN=PRKAB2 PE=1 SV=1	4288	5	6.44498	7.29591	6.73009	6.55135	0.178913	-0.116462	0.0624514	-0.0388354	0.023616
	sp|P07737|PROF1_HUMAN	PFN1	Profilin-1 OS=Homo sapiens OX=9606 GN=PFN1 PE=1 SV=2	3495	21	6.22718	7.04928	6.33626	6.60299	0.178896	-0.153845	0.025051	0.0594876	0.0845386
	sp|Q5SRD1|TI23B_HUMAN	TIMM23B	Putative mitochondrial import inner membrane translocase subunit Tim23B OS=Homo sapiens OX=9606 GN=TIMM23B PE=5 SV=2	5142	2	6.51174	7.37071	6.02883	5.54053	0.178761	-0.289926	-0.111165	-0.121854	-0.233019
	sp|Q9NVU7|SDA1_HUMAN	SDAD1	Protein SDA1 homolog OS=Homo sapiens OX=9606 GN=SDAD1 PE=1 SV=3	4026	5	7.22513	8.17765	6.24982	6.3558	0.178663	-0.387872	-0.209209	0.024258	-0.184951
	sp|Q8NHP6|MSPD2_HUMAN	MOSPD2	Motile sperm domain-containing protein 2 OS=Homo sapiens OX=9606 GN=MOSPD2 PE=1 SV=1	4109	5	6.51187	7.36964	6.36019	6.34926	0.178522	-0.212523	-0.0340005	-0.00248216	-0.0364827
	sp|Q13895|BYST_HUMAN	BYSL	Bystin OS=Homo sapiens OX=9606 GN=BYSL PE=1 SV=3	738	10	6.90766	7.81745	6.36787	6.78434	0.178501	-0.295886	-0.117385	0.0913958	-0.025989
	sp|O43819|SCO2_HUMAN	SCO2	Protein SCO2 homolog, mitochondrial OS=Homo sapiens OX=9606 GN=SCO2 PE=1 SV=3	6619	4	7.10027	8.0342	6.78393	5.72326	0.17828	-0.244033	-0.0657533	-0.245282	-0.311035
	sp|Q9UPY8|MARE3_HUMAN	MAPRE3	Microtubule-associated protein RP/EB family member 3 OS=Homo sapiens OX=9606 GN=MAPRE3 PE=1 SV=1	1447	11	5.50741	6.23167	5.83	7.21561	0.178245	-0.0961233	0.0821214	0.307625	0.389746
	sp|Q8TEY7|UBP33_HUMAN	USP33	Ubiquitin carboxyl-terminal hydrolase 33 OS=Homo sapiens OX=9606 GN=USP33 PE=1 SV=2	3308	2	6.95276	7.8667	7.23846	6.05544	0.178174	-0.120077	0.0580974	-0.257451	-0.199353
	sp|Q7Z6B0|CCD91_HUMAN	CCDC91	Coiled-coil domain-containing protein 91 OS=Homo sapiens OX=9606 GN=CCDC91 PE=1 SV=2	1999	9	6.74933	7.63628	5.83268	6.42152	0.178125	-0.388711	-0.210586	0.138757	-0.0718291
	sp|Q9UMX0|UBQL1_HUMAN	UBQLN1	Ubiquilin-1 OS=Homo sapiens OX=9606 GN=UBQLN1 PE=1 SV=2	4479	7	6.57937	7.44316	6.9466	7.25238	0.177967	-0.0996079	0.0783587	0.0621471	0.140506
	tr|E7EUN2|E7EUN2_HUMAN	AGAP1	Arf-GAP with GTPase, ANK repeat and PH domain-containing protein 1 OS=Homo sapiens OX=9606 GN=AGAP1 PE=1 SV=1	2725	2	6.69282	7.57134	6.90314	7.89436	0.177935	-0.133296	0.0446389	0.193569	0.238208
	sp|Q7Z422|SZRD1_HUMAN	SZRD1	SUZ domain-containing protein 1 OS=Homo sapiens OX=9606 GN=SZRD1 PE=1 SV=1	4449	3	6.13938	6.94222	6.65961	7.03656	0.177303	-0.0599594	0.117344	0.0794336	0.196778
	sp|P46777|RL5_HUMAN	RPL5	60S ribosomal protein L5 OS=Homo sapiens OX=9606 GN=RPL5 PE=1 SV=3	3890	20	6.80368	7.69128	6.35987	6.58524	0.176909	-0.274227	-0.097318	0.0502387	-0.0470793
	sp|Q9NRM2|ZN277_HUMAN	ZNF277	Zinc finger protein 277 OS=Homo sapiens OX=9606 GN=ZNF277 PE=1 SV=2	4798	2	7.18092	8.11628	6.15259	6.41235	0.176651	-0.399626	-0.222975	0.0596601	-0.163315
	sp|P48067|SC6A9_HUMAN	SLC6A9	Sodium- and chloride-dependent glycine transporter 1 OS=Homo sapiens OX=9606 GN=SLC6A9 PE=1 SV=3	4381	2	7.91025	8.93923	5.98316	6.77632	0.176427	-0.579243	-0.402816	0.179596	-0.22322
	sp|P27105|STOM_HUMAN	STOM	Erythrocyte band 7 integral membrane protein OS=Homo sapiens OX=9606 GN=STOM PE=1 SV=3	2178	11	5.67326	6.41037	6.09421	6.18147	0.17623	-0.0729669	0.103263	0.02051	0.123773
	sp|O00116|ADAS_HUMAN	AGPS	Alkyldihydroxyacetonephosphate synthase, peroxisomal OS=Homo sapiens OX=9606 GN=AGPS PE=1 SV=1	435	19	5.80767	6.56215	6.37617	5.81764	0.176209	-0.0414789	0.13473	-0.132256	0.00247454
	sp|Q96ER9|CCD51_HUMAN	CCDC51	Coiled-coil domain-containing protein 51 OS=Homo sapiens OX=9606 GN=CCDC51 PE=1 SV=2	1980	7	6.61681	7.47575	6.94393	5.55008	0.176082	-0.106467	0.0696151	-0.323242	-0.253627
	sp|P82933|RT09_HUMAN	MRPS9	28S ribosomal protein S9, mitochondrial OS=Homo sapiens OX=9606 GN=MRPS9 PE=1 SV=2	849	10	6.21182	7.0156	7.60431	6.12114	0.17555	0.11625	0.2918	-0.313018	-0.0212176
	sp|O60551|NMT2_HUMAN	NMT2	Glycylpeptide N-tetradecanoyltransferase 2 OS=Homo sapiens OX=9606 GN=NMT2 PE=1 SV=1	1610	6	6.19608	6.99647	6.85679	6.49399	0.175272	-0.0290932	0.146178	-0.0784282	0.0677502
	sp|O00534|VMA5A_HUMAN	VWA5A	von Willebrand factor A domain-containing protein 5A OS=Homo sapiens OX=9606 GN=VWA5A PE=2 SV=2	277	15	5.70179	6.43765	6.41966	6.67146	0.175121	-0.00403762	0.171083	0.0555053	0.226588
	sp|O95831|AIFM1_HUMAN	AIFM1	Apoptosis-inducing factor 1, mitochondrial OS=Homo sapiens OX=9606 GN=AIFM1 PE=1 SV=1	333	25	5.78666	6.53338	6.63357	5.98472	0.175099	0.0219552	0.197055	-0.148502	0.0485529
	sp|Q9BV23|ABHD6_HUMAN	ABHD6	Monoacylglycerol lipase ABHD6 OS=Homo sapiens OX=9606 GN=ABHD6 PE=1 SV=1	6061	3	7.26268	8.19944	6.97884	5.87028	0.175023	-0.232537	-0.0575141	-0.249557	-0.307071
	sp|Q5JVS0|HABP4_HUMAN	HABP4	Intracellular hyaluronan-binding protein 4 OS=Homo sapiens OX=9606 GN=HABP4 PE=1 SV=1	3662	4	6.27558	7.08452	7.07492	6.72496	0.174923	-0.00195695	0.172966	-0.0731881	0.0997777
	sp|Q76FK4|NOL8_HUMAN	NOL8	Nucleolar protein 8 OS=Homo sapiens OX=9606 GN=NOL8 PE=1 SV=1	2275	8	5.4793	6.18534	5.3948	5.23502	0.174861	-0.197283	-0.0224221	-0.0433758	-0.0657979
	sp|Q99653|CHP1_HUMAN	CHP1	Calcineurin B homologous protein 1 OS=Homo sapiens OX=9606 GN=CHP1 PE=1 SV=3	2702	4	5.87708	6.63436	6.36903	6.20938	0.174858	-0.058884	0.115974	-0.0366248	0.0793489
	sp|Q8N983-7|RM43_HUMAN	MRPL43	Isoform 6 of 39S ribosomal protein L43, mitochondrial OS=Homo sapiens OX=9606 GN=MRPL43	4648	2	6.31882	7.13041	8.07044	5.61482	0.17433	0.178663	0.352992	-0.523408	-0.170416
	sp|Q9BRS2|RIOK1_HUMAN	RIOK1	Serine/threonine-protein kinase RIO1 OS=Homo sapiens OX=9606 GN=RIOK1 PE=1 SV=2	4081	4	6.52823	7.36602	7.08738	6.80133	0.174193	-0.0556332	0.11856	-0.0594348	0.0591253
	sp|Q9UPN7|PP6R1_HUMAN	PPP6R1	Serine/threonine-protein phosphatase 6 regulatory subunit 1 OS=Homo sapiens OX=9606 GN=PPP6R1 PE=1 SV=5	4573	11	4.49466	5.07069	4.81164	4.58047	0.173971	-0.0756544	0.0983168	-0.0710321	0.0272847
	sp|P27986-4|P85A_HUMAN	PIK3R1	Isoform 4 of Phosphatidylinositol 3-kinase regulatory subunit alpha OS=Homo sapiens OX=9606 GN=PIK3R1	1904	8	4.99366	5.63207	5.03356	5.31726	0.173568	-0.162087	0.011481	0.0791021	0.0905831
	sp|P57081|WDR4_HUMAN	WDR4	tRNA (guanine-N(7)-)-methyltransferase non-catalytic subunit WDR4 OS=Homo sapiens OX=9606 GN=WDR4 PE=1 SV=2	3437	4	5.93826	6.69723	5.56915	5.72112	0.173523	-0.266108	-0.0925844	0.0388409	-0.0537435
	tr|A0A494C169|A0A494C169_HUMAN	PANK4	Pantothenate kinase 4 OS=Homo sapiens OX=9606 GN=PANK4 PE=1 SV=1	2914	12	6.23081	7.02617	6.26125	5.68065	0.173319	-0.166287	0.00703175	-0.140396	-0.133364
	sp|Q9BZF1|OSBL8_HUMAN	OSBPL8	Oxysterol-binding protein-related protein 8 OS=Homo sapiens OX=9606 GN=OSBPL8 PE=1 SV=3	402	13	6.39823	7.21451	6.82529	6.36977	0.173227	-0.0800108	0.0932164	-0.0996498	-0.00643346
	sp|Q9NQP4|PFD4_HUMAN	PFDN4	Prefoldin subunit 4 OS=Homo sapiens OX=9606 GN=PFDN4 PE=1 SV=1	15	3	6.278	7.07808	6.77523	6.46578	0.173052	-0.0630875	0.109965	-0.0674466	0.0425183
	sp|P30043|BLVRB_HUMAN	BLVRB	Flavin reductase (NADPH) OS=Homo sapiens OX=9606 GN=BLVRB PE=1 SV=3	5857	11	6.3722	7.18417	6.50712	5.86451	0.17303	-0.142802	0.0302276	-0.150007	-0.119779
	sp|Q8N3R9|MPP5_HUMAN	MPP5	MAGUK p55 subfamily member 5 OS=Homo sapiens OX=9606 GN=MPP5 PE=1 SV=3	3100	8	5.6513	6.371	6.25429	6.3029	0.172938	-0.0266733	0.146265	0.0111693	0.157434
	sp|P20674|COX5A_HUMAN	COX5A	Cytochrome c oxidase subunit 5A, mitochondrial OS=Homo sapiens OX=9606 GN=COX5A PE=1 SV=2	4833	5	6.65786	7.50489	6.40829	6.22851	0.172772	-0.227893	-0.0551202	-0.0410531	-0.0961733
	sp|Q7Z2W9|RM21_HUMAN	MRPL21	39S ribosomal protein L21, mitochondrial OS=Homo sapiens OX=9606 GN=MRPL21 PE=1 SV=2	5872	6	6.17011	6.95506	8.08722	5.55592	0.172767	0.21758	0.390347	-0.541619	-0.151272
	sp|P51648-2|AL3A2_HUMAN	ALDH3A2	Isoform 2 of Aldehyde dehydrogenase family 3 member A2 OS=Homo sapiens OX=9606 GN=ALDH3A2	3581	16	6.08888	6.8623	7.24595	7.09533	0.172515	0.0784833	0.250999	-0.0303067	0.220692
	sp|O14964|HGS_HUMAN	HGS	Hepatocyte growth factor-regulated tyrosine kinase substrate OS=Homo sapiens OX=9606 GN=HGS PE=1 SV=1	599	15	6.67308	7.51955	6.85063	6.93995	0.172293	-0.134411	0.0378828	0.018689	0.0565717
	sp|P78345|RPP38_HUMAN	RPP38	Ribonuclease P protein subunit p38 OS=Homo sapiens OX=9606 GN=RPP38 PE=1 SV=2	3468	3	6.98802	7.87159	6.50007	6.22232	0.171771	-0.2762	-0.104429	-0.0630008	-0.16743
	sp|Q15714|T22D1_HUMAN	TSC22D1	TSC22 domain family protein 1 OS=Homo sapiens OX=9606 GN=TSC22D1 PE=1 SV=3	981	7	6.4148	7.22474	7.25862	7.24177	0.171543	0.00674962	0.178292	-0.0033536	0.174939
	sp|Q96GW9|SYMM_HUMAN	MARS2	Methionine--tRNA ligase, mitochondrial OS=Homo sapiens OX=9606 GN=MARS2 PE=1 SV=2	6340	4	6.70758	7.55446	7.49266	6.12898	0.171537	-0.0118519	0.159685	-0.289832	-0.130147
	sp|Q96C36|P5CR2_HUMAN	PYCR2	Pyrroline-5-carboxylate reductase 2 OS=Homo sapiens OX=9606 GN=PYCR2 PE=1 SV=1	4705	8	4.51024	5.07965	5.27123	4.36426	0.171524	0.0534105	0.224934	-0.272401	-0.0474666
	sp|Q8NHQ8|RASF8_HUMAN	RASSF8	Ras association domain-containing protein 8 OS=Homo sapiens OX=9606 GN=RASSF8 PE=1 SV=2	5027	5	6.23427	7.02124	7.19689	7.54955	0.171505	0.0356488	0.207154	0.0690167	0.276171
	sp|P82914|RT15_HUMAN	MRPS15	28S ribosomal protein S15, mitochondrial OS=Homo sapiens OX=9606 GN=MRPS15 PE=1 SV=1	4410	2	6.61997	7.45499	7.55041	6.05699	0.171382	0.0183492	0.189731	-0.317955	-0.128224
	sp|O14734|ACOT8_HUMAN	ACOT8	Acyl-coenzyme A thioesterase 8 OS=Homo sapiens OX=9606 GN=ACOT8 PE=1 SV=1	725	10	6.46661	7.28124	6.86964	5.9566	0.171173	-0.0839494	0.0872238	-0.205745	-0.118521
	sp|A1L390|PKHG3_HUMAN	PLEKHG3	Pleckstrin homology domain-containing family G member 3 OS=Homo sapiens OX=9606 GN=PLEKHG3 PE=1 SV=1	4465	6	6.33259	7.12991	7.14105	8.38309	0.171088	0.0022537	0.173341	0.231345	0.404686
	sp|P11177|ODPB_HUMAN	PDHB	Pyruvate dehydrogenase E1 component subunit beta, mitochondrial OS=Homo sapiens OX=9606 GN=PDHB PE=1 SV=3	3536	15	6.22931	7.01222	6.80124	6.0188	0.170798	-0.0440728	0.126725	-0.176322	-0.0495965
	sp|P82673|RT35_HUMAN	MRPS35	28S ribosomal protein S35, mitochondrial OS=Homo sapiens OX=9606 GN=MRPS35 PE=1 SV=1	3711	6	6.16385	6.93849	7.76611	5.48724	0.17079	0.162571	0.333361	-0.501113	-0.167752
	sp|Q147X3|NAA30_HUMAN	NAA30	N-alpha-acetyltransferase 30 OS=Homo sapiens OX=9606 GN=NAA30 PE=1 SV=1	3376	6	6.63001	7.4626	6.81772	6.65529	0.170666	-0.130389	0.0402772	-0.0347885	0.00548868
	sp|Q15382|RHEB_HUMAN	RHEB	GTP-binding protein Rheb OS=Homo sapiens OX=9606 GN=RHEB PE=1 SV=1	1774	8	6.49642	7.31214	6.9554	7.52665	0.170649	-0.0721599	0.098489	0.113876	0.212365
	sp|Q9Y3D9|RT23_HUMAN	MRPS23	28S ribosomal protein S23, mitochondrial OS=Homo sapiens OX=9606 GN=MRPS23 PE=1 SV=2	1140	3	6.77644	7.62659	7.70351	5.28494	0.170511	0.0144765	0.184988	-0.543628	-0.35864
	sp|Q99973|TEP1_HUMAN	TEP1	Telomerase protein component 1 OS=Homo sapiens OX=9606 GN=TEP1 PE=1 SV=2	870	11	5.73607	6.45493	6.99607	5.86706	0.17034	0.116142	0.286483	-0.253907	0.032576
	sp|Q8N4Q1-2|MIA40_HUMAN	CHCHD4	Isoform 2 of Mitochondrial intermembrane space import and assembly protein 40 OS=Homo sapiens OX=9606 GN=CHCHD4	2235	3	5.73574	6.45356	6.37377	5.67157	0.170116	-0.0179486	0.152168	-0.1684	-0.0162327
	tr|F5H211|F5H211_HUMAN	ATXN3	Ataxin-3 OS=Homo sapiens OX=9606 GN=ATXN3 PE=1 SV=2	1696	2	6.43296	7.23688	7.07514	8.26981	0.169885	-0.0326095	0.137276	0.225095	0.362371
	sp|P46939|UTRO_HUMAN	UTRN	Utrophin OS=Homo sapiens OX=9606 GN=UTRN PE=1 SV=2	685	29	5.56944	6.26498	6.60992	7.59765	0.169778	0.0773233	0.247102	0.200921	0.448023
	sp|Q96DV4|RM38_HUMAN	MRPL38	39S ribosomal protein L38, mitochondrial OS=Homo sapiens OX=9606 GN=MRPL38 PE=1 SV=2	1058	8	6.16368	6.9329	8.29427	5.47229	0.169667	0.258655	0.428322	-0.59997	-0.171648
	sp|Q9H074|PAIP1_HUMAN	PAIP1	Polyadenylate-binding protein-interacting protein 1 OS=Homo sapiens OX=9606 GN=PAIP1 PE=1 SV=1	2371	6	6.1437	6.91	6.39696	6.47725	0.169577	-0.111297	0.0582798	0.017995	0.0762748
	sp|P22033|MUTA_HUMAN	MMUT	Methylmalonyl-CoA mutase, mitochondrial OS=Homo sapiens OX=9606 GN=MMUT PE=1 SV=4	543	19	5.88056	6.61364	6.60048	6.498	0.169491	-0.00287284	0.166618	-0.0225759	0.144042
	sp|Q5NDL2|EOGT_HUMAN	EOGT	EGF domain-specific O-linked N-acetylglucosamine transferase OS=Homo sapiens OX=9606 GN=EOGT PE=1 SV=1	4244	6	6.32011	7.10761	8.19963	5.25956	0.169415	0.206194	0.375609	-0.640618	-0.265009
	sp|P05386|RLA1_HUMAN	RPLP1	60S acidic ribosomal protein P1 OS=Homo sapiens OX=9606 GN=RPLP1 PE=1 SV=1	247	4	6.56185	7.37876	6.80531	6.80692	0.169274	-0.116718	0.0525568	0.000343039	0.0528999
	sp|Q8NDI1-3|EHBP1_HUMAN	EHBP1	Isoform 3 of EH domain-binding protein 1 OS=Homo sapiens OX=9606 GN=EHBP1	977	17	6.04941	6.80163	6.49458	8.1522	0.169086	-0.0666436	0.102443	0.327952	0.430395
	sp|O75879|GATB_HUMAN	GATB	Glutamyl-tRNA(Gln) amidotransferase subunit B, mitochondrial OS=Homo sapiens OX=9606 GN=GATB PE=1 SV=1	785	6	6.15905	6.92439	6.95117	6.26059	0.168978	0.00556989	0.174548	-0.150959	0.0235889
	sp|Q16543|CDC37_HUMAN	CDC37	Hsp90 co-chaperone Cdc37 OS=Homo sapiens OX=9606 GN=CDC37 PE=1 SV=1	3256	7	6.51991	7.3292	6.74709	6.71716	0.168804	-0.119389	0.0494148	-0.00641473	0.0430001
	sp|Q4U2R6|RM51_HUMAN	MRPL51	39S ribosomal protein L51, mitochondrial OS=Homo sapiens OX=9606 GN=MRPL51 PE=1 SV=1	6431	3	5.63107	6.32939	7.48103	5.04018	0.168658	0.24117	0.409828	-0.569762	-0.159934
	sp|Q9UKY7|CDV3_HUMAN	CDV3	Protein CDV3 homolog OS=Homo sapiens OX=9606 GN=CDV3 PE=1 SV=1	5154	8	6.36782	7.15687	6.02902	6.51313	0.168529	-0.247405	-0.0788761	0.111427	0.0325511
	sp|P62070-4|RRAS2_HUMAN	RRAS2	Isoform 4 of Ras-related protein R-Ras2 OS=Homo sapiens OX=9606 GN=RRAS2	4204	4	5.73256	6.44281	4.77739	8.10379	0.168511	-0.431469	-0.262957	0.762375	0.499417
	sp|Q9BQ95|ECSIT_HUMAN	ECSIT	Evolutionarily conserved signaling intermediate in Toll pathway, mitochondrial OS=Homo sapiens OX=9606 GN=ECSIT PE=1 SV=1	750	3	7.54112	8.47435	6.89408	5.29456	0.168323	-0.297745	-0.129421	-0.380847	-0.510269
	sp|Q92520|FAM3C_HUMAN	FAM3C	Protein FAM3C OS=Homo sapiens OX=9606 GN=FAM3C PE=1 SV=1	1689	9	6.39997	7.19185	6.60577	7.23517	0.168296	-0.122635	0.0456616	0.1313	0.176962
	sp|P15529-2|MCP_HUMAN	CD46	Isoform B of Membrane cofactor protein OS=Homo sapiens OX=9606 GN=CD46	705	7	5.74622	6.4565	5.65301	6.8882	0.16814	-0.191734	-0.023594	0.285109	0.261515
	sp|Q15800|MSMO1_HUMAN	MSMO1	Methylsterol monooxygenase 1 OS=Homo sapiens OX=9606 GN=MSMO1 PE=1 SV=1	3195	3	6.79442	7.63405	7.5644	5.66412	0.168098	-0.0132233	0.154875	-0.417374	-0.262499
	sp|Q13636|RAB31_HUMAN	RAB31	Ras-related protein Rab-31 OS=Homo sapiens OX=9606 GN=RAB31 PE=1 SV=1	1790	6	6.72134	7.55085	7.29064	4.36528	0.16789	-0.0505936	0.117296	-0.739971	-0.622675
	sp|Q9NYL2|M3K20_HUMAN	MAP3K20	Mitogen-activated protein kinase kinase kinase 20 OS=Homo sapiens OX=9606 GN=MAP3K20 PE=1 SV=3	4235	3	6.42322	7.21329	6.8515	8.99073	0.167362	-0.0742375	0.0931246	0.392017	0.485141
	sp|P45381|ACY2_HUMAN	ASPA	Aspartoacylase OS=Homo sapiens OX=9606 GN=ASPA PE=1 SV=1	3688	5	3.83237	4.30366	5.3779	7.12679	0.167329	0.321479	0.488808	0.406209	0.895016
	sp|Q15050|RRS1_HUMAN	RRS1	Ribosome biogenesis regulatory protein homolog OS=Homo sapiens OX=9606 GN=RRS1 PE=1 SV=2	4125	3	6.63076	7.44357	6.19399	6.19876	0.166821	-0.265124	-0.0983037	0.00110865	-0.097195
	sp|Q6FI81|CPIN1_HUMAN	CIAPIN1	Anamorsin OS=Homo sapiens OX=9606 GN=CIAPIN1 PE=1 SV=2	3132	6	6.46051	7.25229	6.5416	6.17596	0.166789	-0.148793	0.0179966	-0.0829817	-0.0649851
	sp|P04424|ARLY_HUMAN	ASL	Argininosuccinate lyase OS=Homo sapiens OX=9606 GN=ASL PE=1 SV=4	1015	11	6.01858	6.75514	5.86413	6.73049	0.166562	-0.204069	-0.0375073	0.198795	0.161288
	sp|Q9Y3S2|ZN330_HUMAN	ZNF330	Zinc finger protein 330 OS=Homo sapiens OX=9606 GN=ZNF330 PE=1 SV=1	3222	4	6.46729	7.25487	7.51742	6.86449	0.165788	0.0512885	0.217077	-0.131086	0.0859912
	sp|P29083|T2EA_HUMAN	GTF2E1	General transcription factor IIE subunit 1 OS=Homo sapiens OX=9606 GN=GTF2E1 PE=1 SV=2	1976	5	6.90999	7.75107	6.42187	6.59845	0.165713	-0.271402	-0.105689	0.0391344	-0.0665547
	sp|Q12904-2|AIMP1_HUMAN	AIMP1	Isoform 2 of Aminoacyl tRNA synthase complex-interacting multifunctional protein 1 OS=Homo sapiens OX=9606 GN=AIMP1	1664	8	6.51726	7.31007	6.76753	6.27535	0.165619	-0.111255	0.0543642	-0.108934	-0.0545696
	sp|Q9P0M9|RM27_HUMAN	MRPL27	39S ribosomal protein L27, mitochondrial OS=Homo sapiens OX=9606 GN=MRPL27 PE=1 SV=1	3324	3	6.38486	7.16139	8.03359	5.57983	0.165585	0.165805	0.331389	-0.525824	-0.194435
	sp|Q15054|DPOD3_HUMAN	POLD3	DNA polymerase delta subunit 3 OS=Homo sapiens OX=9606 GN=POLD3 PE=1 SV=2	5730	4	6.23801	6.99637	6.75415	6.59995	0.165521	-0.0508331	0.114688	-0.033318	0.0813696
	tr|E9PCR7|E9PCR7_HUMAN	OGDH	2-oxoglutarate dehydrogenase, mitochondrial OS=Homo sapiens OX=9606 GN=OGDH PE=1 SV=1	1061	29	6.10166	6.8432	7.15496	6.05126	0.165471	0.0642726	0.229743	-0.241709	-0.0119654
	sp|Q9H0B6|KLC2_HUMAN	KLC2	Kinesin light chain 2 OS=Homo sapiens OX=9606 GN=KLC2 PE=1 SV=1	1783	8	5.47248	6.13672	5.23894	5.27073	0.165272	-0.228194	-0.0629216	0.00872877	-0.0541929
	tr|G3V1L9|G3V1L9_HUMAN	TJP1	Tight junction protein 1 (Zona occludens 1), isoform CRA_a OS=Homo sapiens OX=9606 GN=TJP1 PE=1 SV=1	1064	16	5.3044	5.94587	6.09105	6.18169	0.164698	0.0348022	0.1995	0.0213115	0.220812
	sp|Q13084|RM28_HUMAN	MRPL28	39S ribosomal protein L28, mitochondrial OS=Homo sapiens OX=9606 GN=MRPL28 PE=1 SV=4	4702	4	5.37886	6.02929	6.96686	5.03329	0.164686	0.208521	0.373207	-0.469008	-0.095801
	sp|P49773|HINT1_HUMAN	HINT1	Histidine triad nucleotide-binding protein 1 OS=Homo sapiens OX=9606 GN=HINT1 PE=1 SV=2	3284	12	6.35716	7.12584	6.94967	6.64422	0.164676	-0.0361142	0.128562	-0.0648453	0.0637167
	sp|P23381|SYWC_HUMAN	WARS	Tryptophan--tRNA ligase, cytoplasmic OS=Homo sapiens OX=9606 GN=WARS PE=1 SV=2	26	22	6.14653	6.8894	6.16427	6.72412	0.164605	-0.160448	0.00415788	0.125415	0.129573
	sp|O43615|TIM44_HUMAN	TIMM44	Mitochondrial import inner membrane translocase subunit TIM44 OS=Homo sapiens OX=9606 GN=TIMM44 PE=1 SV=2	2107	9	5.20003	5.8279	5.46182	4.89951	0.164456	-0.0935957	0.0708605	-0.156743	-0.0858825
	sp|P57088|TMM33_HUMAN	TMEM33	Transmembrane protein 33 OS=Homo sapiens OX=9606 GN=TMEM33 PE=1 SV=2	1953	5	7.04493	7.89461	7.10207	6.28449	0.164283	-0.152628	0.0116549	-0.176445	-0.16479
	sp|Q8WUM4|PDC6I_HUMAN	PDCD6IP	Programmed cell death 6-interacting protein OS=Homo sapiens OX=9606 GN=PDCD6IP PE=1 SV=1	2977	23	5.67949	6.3635	6.46781	7.48902	0.164059	0.0234557	0.187515	0.211501	0.399016
	sp|P45880|VDAC2_HUMAN	VDAC2	Voltage-dependent anion-selective channel protein 2 OS=Homo sapiens OX=9606 GN=VDAC2 PE=1 SV=2	5605	21	5.37167	6.01834	5.77228	5.49161	0.163995	-0.0602255	0.103769	-0.0719117	0.0318576
	sp|Q92633-2|LPAR1_HUMAN	LPAR1	Isoform 2 of Lysophosphatidic acid receptor 1 OS=Homo sapiens OX=9606 GN=LPAR1	6434	2	6.13029	6.86685	7.19291	8.92553	0.163693	0.0669261	0.230619	0.311363	0.541983
	sp|Q99729-3|ROAA_HUMAN	HNRNPAB	Isoform 3 of Heterogeneous nuclear ribonucleoprotein A/B OS=Homo sapiens OX=9606 GN=HNRNPAB	3515	4	6.70659	7.51195	6.7795	7.01811	0.163607	-0.148009	0.015598	0.0499034	0.0655014
	sp|O15516|CLOCK_HUMAN	CLOCK	Circadian locomoter output cycles protein kaput OS=Homo sapiens OX=9606 GN=CLOCK PE=1 SV=1	4822	3	6.95498	7.78985	7.07249	6.66527	0.163549	-0.139378	0.0241712	-0.0855549	-0.0613837
	sp|Q9H3H1|MOD5_HUMAN	TRIT1	tRNA dimethylallyltransferase OS=Homo sapiens OX=9606 GN=TRIT1 PE=1 SV=1	2727	3	6.41358	7.1823	5.91506	6.28138	0.163315	-0.280052	-0.116737	0.0866876	-0.0300495
	sp|P54727|RD23B_HUMAN	RAD23B	UV excision repair protein RAD23 homolog B OS=Homo sapiens OX=9606 GN=RAD23B PE=1 SV=1	2611	13	6.37942	7.1426	6.41793	7.68645	0.163024	-0.154342	0.00868241	0.260209	0.268891
	sp|Q9BUP3-3|HTAI2_HUMAN	HTATIP2	Isoform 3 of Oxidoreductase HTATIP2 OS=Homo sapiens OX=9606 GN=HTATIP2	1643	6	7.0104	7.84881	6.61383	4.1577	0.162976	-0.246989	-0.0840122	-0.6697	-0.753712
	tr|E5RIM7|E5RIM7_HUMAN	ATOX1	Copper transport protein ATOX1 OS=Homo sapiens OX=9606 GN=ATOX1 PE=1 SV=1	5859	4	6.28771	7.03879	6.80751	7.29521	0.162791	-0.0482003	0.114591	0.099823	0.214414
	sp|P21964|COMT_HUMAN	COMT	Catechol O-methyltransferase OS=Homo sapiens OX=9606 GN=COMT PE=1 SV=2	5193	17	6.21873	6.96065	6.07362	6.10442	0.162602	-0.196665	-0.0340634	0.00729955	-0.0267638
	sp|Q13451|FKBP5_HUMAN	FKBP5	Peptidyl-prolyl cis-trans isomerase FKBP5 OS=Homo sapiens OX=9606 GN=FKBP5 PE=1 SV=2	4312	7	5.3661	6.00564	4.60273	4.5459	0.162443	-0.383829	-0.221386	-0.0179233	-0.239309
	sp|Q13158|FADD_HUMAN	FADD	FAS-associated death domain protein OS=Homo sapiens OX=9606 GN=FADD PE=1 SV=1	4962	2	6.63609	7.42569	7.15402	7.44528	0.162192	-0.0537719	0.10842	0.057573	0.165993
	sp|O15160|RPAC1_HUMAN	POLR1C	DNA-directed RNA polymerases I and III subunit RPAC1 OS=Homo sapiens OX=9606 GN=POLR1C PE=1 SV=1	3207	9	7.21452	8.07239	6.92376	6.29835	0.162093	-0.221441	-0.059348	-0.13658	-0.195928
	sp|O00463-2|TRAF5_HUMAN	TRAF5	Isoform 2 of TNF receptor-associated factor 5 OS=Homo sapiens OX=9606 GN=TRAF5	3655	3	7.44435	8.32893	7.06479	5.14573	0.161986	-0.237485	-0.0754992	-0.457272	-0.532772
	sp|P82650|RT22_HUMAN	MRPS22	28S ribosomal protein S22, mitochondrial OS=Homo sapiens OX=9606 GN=MRPS22 PE=1 SV=1	4174	8	5.79497	6.48242	6.7162	5.43981	0.161731	0.0511142	0.212846	-0.30409	-0.0912441
	sp|Q5QJE6|TDIF2_HUMAN	DNTTIP2	Deoxynucleotidyltransferase terminal-interacting protein 2 OS=Homo sapiens OX=9606 GN=DNTTIP2 PE=1 SV=2	2354	7	6.02598	6.74037	5.51516	5.94428	0.161632	-0.289425	-0.127793	0.108099	-0.0196942
	sp|P09104|ENOG_HUMAN	ENO2	Gamma-enolase OS=Homo sapiens OX=9606 GN=ENO2 PE=1 SV=3	539	10	5.17495	5.78746	7.52286	4.61013	0.161386	0.378351	0.539737	-0.706474	-0.166737
	sp|Q9BYD1|RM13_HUMAN	MRPL13	39S ribosomal protein L13, mitochondrial OS=Homo sapiens OX=9606 GN=MRPL13 PE=1 SV=1	2421	6	5.99912	6.70874	8.51873	5.38202	0.161292	0.344596	0.505887	-0.66249	-0.156603
	sp|Q9BWH2|FUND2_HUMAN	FUNDC2	FUN14 domain-containing protein 2 OS=Homo sapiens OX=9606 GN=FUNDC2 PE=1 SV=2	920	2	5.7388	6.41693	7.04234	6.21452	0.161133	0.134171	0.295304	-0.180412	0.114892
	sp|Q96ND0|F210A_HUMAN	FAM210A	Protein FAM210A OS=Homo sapiens OX=9606 GN=FAM210A PE=1 SV=2	4642	4	5.65564	6.32346	6.4586	5.2932	0.161023	0.0305077	0.191531	-0.287083	-0.0955523
	sp|Q8WV22|NSE1_HUMAN	NSMCE1	Non-structural maintenance of chromosomes element 1 homolog OS=Homo sapiens OX=9606 GN=NSMCE1 PE=1 SV=5	5146	2	7.04983	7.88164	6.95216	6.74629	0.160907	-0.181034	-0.0201268	-0.0433669	-0.0634937
	sp|O00165-2|HAX1_HUMAN	HAX1	Isoform 2 of HCLS1-associated protein X-1 OS=Homo sapiens OX=9606 GN=HAX1	5250	2	6.68559	7.47354	7.40434	6.54828	0.160738	-0.0134196	0.147318	-0.177257	-0.0299393
	sp|A6NJ78|MET15_HUMAN	METTL15	Probable methyltransferase-like protein 15 OS=Homo sapiens OX=9606 GN=METTL15 PE=1 SV=1	2391	3	5.68027	6.34856	6.94142	6.0507	0.160469	0.128801	0.289271	-0.198129	0.0911414
	sp|Q9Y608|LRRF2_HUMAN	LRRFIP2	Leucine-rich repeat flightless-interacting protein 2 OS=Homo sapiens OX=9606 GN=LRRFIP2 PE=1 SV=1	1373	12	6.47778	7.2386	6.52344	6.36369	0.16021	-0.150077	0.0101331	-0.0357686	-0.0256355
	sp|P48723|HSP13_HUMAN	HSPA13	Heat shock 70 kDa protein 13 OS=Homo sapiens OX=9606 GN=HSPA13 PE=1 SV=1	5973	8	6.97987	7.79944	6.44053	6.61596	0.160172	-0.276191	-0.116019	0.0387714	-0.0772479
	sp|Q99595|TI17A_HUMAN	TIMM17A	Mitochondrial import inner membrane translocase subunit Tim17-A OS=Homo sapiens OX=9606 GN=TIMM17A PE=1 SV=1	4583	3	7.14774	7.9863	7.13995	5.87911	0.16004	-0.161612	-0.00157184	-0.280318	-0.28189
	sp|Q15369|ELOC_HUMAN	ELOC	Elongin-C OS=Homo sapiens OX=9606 GN=ELOC PE=1 SV=1	2227	8	6.3794	7.12708	6.88931	7.25827	0.159891	-0.048952	0.110939	0.0752666	0.186206
	tr|X6RLX0|X6RLX0_HUMAN	ERC1	ELKS/Rab6-interacting/CAST family member 1 OS=Homo sapiens OX=9606 GN=ERC1 PE=1 SV=1	231	18	5.90568	6.59731	5.6335	6.56724	0.159775	-0.227846	-0.0680717	0.221255	0.153184
	sp|Q9Y3B8|ORN_HUMAN	REXO2	Oligoribonuclease, mitochondrial OS=Homo sapiens OX=9606 GN=REXO2 PE=1 SV=3	4720	13	6.3061	7.04333	6.59728	6.74529	0.159509	-0.0943849	0.065124	0.0320084	0.0971324
	sp|Q96HE7|ERO1A_HUMAN	ERO1A	ERO1-like protein alpha OS=Homo sapiens OX=9606 GN=ERO1A PE=1 SV=2	2942	18	5.68185	6.34508	6.48367	5.05759	0.159278	0.0311731	0.190451	-0.358361	-0.167911
	sp|P41240|CSK_HUMAN	CSK	Tyrosine-protein kinase CSK OS=Homo sapiens OX=9606 GN=CSK PE=1 SV=1	5111	9	6.22424	6.94957	6.56298	6.80175	0.159027	-0.0825719	0.0764549	0.0515553	0.12801
	sp|Q8TBX8|PI42C_HUMAN	PIP4K2C	Phosphatidylinositol 5-phosphate 4-kinase type-2 gamma OS=Homo sapiens OX=9606 GN=PIP4K2C PE=1 SV=3	3245	6	6.13247	6.84704	5.46419	3.71277	0.159013	-0.325472	-0.166459	-0.557512	-0.723972
	sp|Q53H82|LACB2_HUMAN	LACTB2	Endoribonuclease LACTB2 OS=Homo sapiens OX=9606 GN=LACTB2 PE=1 SV=2	730	9	6.43122	7.18032	7.33887	6.38045	0.158954	0.0315111	0.190465	-0.201899	-0.0114339
	sp|Q96GY0|ZC21A_HUMAN	ZC2HC1A	Zinc finger C2HC domain-containing protein 1A OS=Homo sapiens OX=9606 GN=ZC2HC1A PE=1 SV=2	949	6	4.77565	5.33035	6.02888	5.19138	0.158533	0.177659	0.336192	-0.215771	0.120421
	sp|P05198|IF2A_HUMAN	EIF2S1	Eukaryotic translation initiation factor 2 subunit 1 OS=Homo sapiens OX=9606 GN=EIF2S1 PE=1 SV=3	727	17	5.62019	6.27192	5.55684	5.4483	0.15829	-0.174642	-0.0163525	-0.0284594	-0.0448119
	sp|P62917|RL8_HUMAN	RPL8	60S ribosomal protein L8 OS=Homo sapiens OX=9606 GN=RPL8 PE=1 SV=2	2515	12	3.8999	4.35173	3.85147	3.64398	0.158153	-0.17618	-0.0180273	-0.0798968	-0.0979241
	sp|Q9UN86|G3BP2_HUMAN	G3BP2	Ras GTPase-activating protein-binding protein 2 OS=Homo sapiens OX=9606 GN=G3BP2 PE=1 SV=2	1255	7	6.01846	6.71565	6.32956	5.809	0.158134	-0.0854222	0.072712	-0.123815	-0.0511025
	sp|Q6GMV3|PTRD1_HUMAN	PTRHD1	Putative peptidyl-tRNA hydrolase PTRHD1 OS=Homo sapiens OX=9606 GN=PTRHD1 PE=1 SV=1	3860	2	6.01139	6.70763	7.09402	6.72521	0.158104	0.0807989	0.238903	-0.0770245	0.161879
	tr|U3KQP1|U3KQP1_HUMAN		Uncharacterized protein (Fragment) OS=Homo sapiens OX=9606 PE=4 SV=1	3179	3	6.85974	7.65405	7.29139	6.35516	0.158069	-0.0700304	0.0880383	-0.198264	-0.110226
	sp|Q96GA7|SDSL_HUMAN	SDSL	Serine dehydratase-like OS=Homo sapiens OX=9606 GN=SDSL PE=1 SV=1	1840	8	6.25489	6.97898	6.74543	7.36045	0.158032	-0.0491054	0.108926	0.125882	0.234808
	sp|O60890|OPHN1_HUMAN	OPHN1	Oligophrenin-1 OS=Homo sapiens OX=9606 GN=OPHN1 PE=1 SV=1	4974	2	5.60385	6.25162	8.06342	8.02651	0.157812	0.367161	0.524973	-0.00662024	0.518353
	sp|Q9NVV0|TM38B_HUMAN	TMEM38B	Trimeric intracellular cation channel type B OS=Homo sapiens OX=9606 GN=TMEM38B PE=1 SV=1	5526	5	6.39458	7.13246	6.79786	5.57072	0.157549	-0.0693191	0.0882303	-0.287216	-0.198985
	sp|Q9UBS8|RNF14_HUMAN	RNF14	E3 ubiquitin-protein ligase RNF14 OS=Homo sapiens OX=9606 GN=RNF14 PE=1 SV=1	1088	6	6.05713	6.75563	6.26531	7.01369	0.157457	-0.108706	0.0487504	0.162789	0.211539
	sp|Q8IVS2|FABD_HUMAN	MCAT	Malonyl-CoA-acyl carrier protein transacylase, mitochondrial OS=Homo sapiens OX=9606 GN=MCAT PE=1 SV=2	3561	5	6.77927	7.5604	7.17861	6.95466	0.157332	-0.0747567	0.0825753	-0.0457252	0.0368501
	tr|A0A096LPI6|A0A096LPI6_HUMAN		Utp12 domain-containing protein (Fragment) OS=Homo sapiens OX=9606 PE=4 SV=2	4676	12	6.02557	6.71942	6.51267	6.7577	0.15724	-0.045088	0.112152	0.0532825	0.165434
	sp|Q9UKG9-3|OCTC_HUMAN	CROT	Isoform 3 of Peroxisomal carnitine O-octanoyltransferase OS=Homo sapiens OX=9606 GN=CROT	5439	4	5.01566	5.59259	5.32415	5.15369	0.157077	-0.0709667	0.0861103	-0.046945	0.0391652
	sp|Q13620|CUL4B_HUMAN	CUL4B	Cullin-4B OS=Homo sapiens OX=9606 GN=CUL4B PE=1 SV=4	1173	21	6.94774	7.7457	6.1042	6.84281	0.156851	-0.343592	-0.186741	0.164785	-0.0219566
	tr|A0A494C165|A0A494C165_HUMAN	PEPD	Xaa-Pro dipeptidase (Fragment) OS=Homo sapiens OX=9606 GN=PEPD PE=1 SV=1	2955	13	6.96116	7.76043	6.99601	6.44649	0.15681	-0.149606	0.00720428	-0.118016	-0.110812
	sp|P30419|NMT1_HUMAN	NMT1	Glycylpeptide N-tetradecanoyltransferase 1 OS=Homo sapiens OX=9606 GN=NMT1 PE=1 SV=2	1610	6	5.67123	6.32185	6.10258	5.87197	0.156684	-0.0509271	0.105757	-0.0555751	0.0501821
	sp|Q09472|EP300_HUMAN	EP300	Histone acetyltransferase p300 OS=Homo sapiens OX=9606 GN=EP300 PE=1 SV=2	4651	2	7.29813	8.135	6.64698	6.90936	0.156615	-0.291444	-0.134829	0.0558534	-0.0789754
	sp|O60292|SI1L3_HUMAN	SIPA1L3	Signal-induced proliferation-associated 1-like protein 3 OS=Homo sapiens OX=9606 GN=SIPA1L3 PE=1 SV=3	3549	2	6.64109	7.40181	6.89824	8.24093	0.156458	-0.101649	0.0548093	0.256578	0.311388
	sp|O95210|STBD1_HUMAN	STBD1	Starch-binding domain-containing protein 1 OS=Homo sapiens OX=9606 GN=STBD1 PE=1 SV=1	469	8	6.09753	6.79589	6.91156	4.7955	0.156439	0.0243489	0.180788	-0.527332	-0.346544
	sp|Q8TCC3-2|RM30_HUMAN	MRPL30	Isoform 2 of 39S ribosomal protein L30, mitochondrial OS=Homo sapiens OX=9606 GN=MRPL30	1558	2	5.60002	6.24102	7.99627	5.00319	0.156348	0.357547	0.513895	-0.676481	-0.162586
	sp|O75592|MYCB2_HUMAN	MYCBP2	E3 ubiquitin-protein ligase MYCBP2 OS=Homo sapiens OX=9606 GN=MYCBP2 PE=1 SV=4	457	25	6.02277	6.7119	7.09861	6.91849	0.156295	0.0808153	0.23711	-0.0370794	0.200031
	sp|Q9Y576|ASB1_HUMAN	ASB1	Ankyrin repeat and SOCS box protein 1 OS=Homo sapiens OX=9606 GN=ASB1 PE=1 SV=1	6293	2	4.07697	4.54335	3.54871	4.28523	0.156259	-0.356464	-0.200205	0.272079	0.0718741
	sp|P07195|LDHB_HUMAN	LDHB	L-lactate dehydrogenase B chain OS=Homo sapiens OX=9606 GN=LDHB PE=1 SV=2	3614	19	6.25408	6.96701	6.89606	6.54171	0.155742	-0.014767	0.140975	-0.0761031	0.064872
	sp|Q9UPU7|TBD2B_HUMAN	TBC1D2B	TBC1 domain family member 2B OS=Homo sapiens OX=9606 GN=TBC1D2B PE=1 SV=2	3502	17	5.75834	6.4146	6.24485	6.92961	0.155706	-0.0386909	0.117015	0.150106	0.267121
	sp|Q96G21|IMP4_HUMAN	IMP4	U3 small nucleolar ribonucleoprotein protein IMP4 OS=Homo sapiens OX=9606 GN=IMP4 PE=1 SV=1	2277	2	7.40438	8.24587	6.48628	7.06578	0.155294	-0.346281	-0.190987	0.123456	-0.0675305
	sp|Q9UBQ7|GRHPR_HUMAN	GRHPR	Glyoxylate reductase/hydroxypyruvate reductase OS=Homo sapiens OX=9606 GN=GRHPR PE=1 SV=1	96	18	6.81555	7.58973	7.45835	6.01704	0.155219	-0.0251911	0.130027	-0.309803	-0.179775
	sp|Q01850|CDR2_HUMAN	CDR2	Cerebellar degeneration-related protein 2 OS=Homo sapiens OX=9606 GN=CDR2 PE=1 SV=2	4983	3	5.54718	6.17692	5.84814	6.22837	0.155133	-0.078911	0.076222	0.0908772	0.167099
	tr|A0A0C4DFL7|A0A0C4DFL7_HUMAN	CYP51A1	Lanosterol 14-alpha demethylase OS=Homo sapiens OX=9606 GN=CYP51A1 PE=1 SV=1	3261	9	6.15837	6.85739	7.156	5.58861	0.155112	0.0614931	0.216605	-0.356664	-0.140059
	sp|P28838|AMPL_HUMAN	LAP3	Cytosol aminopeptidase OS=Homo sapiens OX=9606 GN=LAP3 PE=1 SV=3	225	22	6.65885	7.4143	6.61274	6.52635	0.155038	-0.165063	-0.0100245	-0.0189733	-0.0289978
	sp|P62847-4|RS24_HUMAN	RPS24	Isoform 4 of 40S ribosomal protein S24 OS=Homo sapiens OX=9606 GN=RPS24	6652	7	6.38782	7.11235	6.07949	6.4169	0.155001	-0.226377	-0.0713753	0.0779263	0.00655096
	sp|Q9Y3C8|UFC1_HUMAN	UFC1	Ubiquitin-fold modifier-conjugating enzyme 1 OS=Homo sapiens OX=9606 GN=UFC1 PE=1 SV=3	3494	3	5.57082	6.20267	6.35679	5.71435	0.154998	0.035411	0.190409	-0.15371	0.0366988
	sp|A1L188|NDUF8_HUMAN	NDUFAF8	NADH dehydrogenase [ubiquinone] 1 alpha subcomplex assembly factor 8 OS=Homo sapiens OX=9606 GN=NDUFAF8 PE=1 SV=1	3479	2	5.54954	6.1785	6.17228	5.70639	0.154888	-0.00145234	0.153436	-0.113227	0.0402089
	sp|Q96Q11|TRNT1_HUMAN	TRNT1	CCA tRNA nucleotidyltransferase 1, mitochondrial OS=Homo sapiens OX=9606 GN=TRNT1 PE=1 SV=2	3682	7	6.46236	7.1942	7.07488	6.33596	0.154774	-0.0241296	0.130644	-0.159142	-0.0284979
	sp|Q9BVJ7|DUS23_HUMAN	DUSP23	Dual specificity protein phosphatase 23 OS=Homo sapiens OX=9606 GN=DUSP23 PE=1 SV=1	5494	3	7.39609	8.23197	7.0261	5.47962	0.154474	-0.228514	-0.07404	-0.358648	-0.432688
	sp|Q9BZE4|NOG1_HUMAN	GTPBP4	Nucleolar GTP-binding protein 1 OS=Homo sapiens OX=9606 GN=GTPBP4 PE=1 SV=3	530	11	7.18772	7.99884	6.40822	6.81436	0.154257	-0.319868	-0.165611	0.0886552	-0.076956
	sp|Q9HCE6|ARGAL_HUMAN	ARHGEF10L	Rho guanine nucleotide exchange factor 10-like protein OS=Homo sapiens OX=9606 GN=ARHGEF10L PE=1 SV=4	2584	4	6.07868	6.76244	7.29259	6.52644	0.153784	0.108888	0.262673	-0.160136	0.102536
	sp|Q9NX74|DUS2L_HUMAN	DUS2	tRNA-dihydrouridine(20) synthase [NAD(P)+]-like OS=Homo sapiens OX=9606 GN=DUS2 PE=1 SV=1	2476	5	6.76571	7.52432	6.91942	6.29152	0.153321	-0.120911	0.0324091	-0.137242	-0.104833
	sp|P20594|ANPRB_HUMAN	NPR2	Atrial natriuretic peptide receptor 2 OS=Homo sapiens OX=9606 GN=NPR2 PE=1 SV=1	3489	5	6.25269	6.95365	7.51795	7.63664	0.153293	0.112569	0.265861	0.0226	0.288461
	sp|P48506|GSH1_HUMAN	GCLC	Glutamate--cysteine ligase catalytic subunit OS=Homo sapiens OX=9606 GN=GCLC PE=1 SV=2	2614	10	6.04756	6.72548	6.5758	6.72575	0.153284	-0.0324715	0.120813	0.0325295	0.153342
	sp|P42696|RBM34_HUMAN	RBM34	RNA-binding protein 34 OS=Homo sapiens OX=9606 GN=RBM34 PE=1 SV=2	4646	4	7.17147	7.97106	6.76403	6.99411	0.152503	-0.236889	-0.0843855	0.0482571	-0.0361284
	sp|P43304|GPDM_HUMAN	GPD2	Glycerol-3-phosphate dehydrogenase, mitochondrial OS=Homo sapiens OX=9606 GN=GPD2 PE=1 SV=3	1851	18	5.66239	6.29182	5.40318	6.67698	0.152066	-0.219669	-0.0676037	0.305388	0.237785
	sp|Q9Y6G9|DC1L1_HUMAN	DYNC1LI1	Cytoplasmic dynein 1 light intermediate chain 1 OS=Homo sapiens OX=9606 GN=DYNC1LI1 PE=1 SV=3	879	13	6.38547	7.09474	6.70005	6.92736	0.151957	-0.0825762	0.0693809	0.0481338	0.117515
	sp|Q9UQ53-3|MGT4B_HUMAN	MGAT4B	Isoform 3 of Alpha-1,3-mannosyl-glycoprotein 4-beta-N-acetylglucosaminyltransferase B OS=Homo sapiens OX=9606 GN=MGAT4B	4548	2	5.30915	5.89866	5.60997	5.62869	0.151907	-0.072395	0.0795122	0.00480614	0.0843183
	sp|O15382|BCAT2_HUMAN	BCAT2	Branched-chain-amino-acid aminotransferase, mitochondrial OS=Homo sapiens OX=9606 GN=BCAT2 PE=1 SV=2	114	9	5.97396	6.63616	6.52791	7.004	0.151662	-0.023729	0.127933	0.10156	0.229493
	tr|C9JA08|C9JA08_HUMAN	NMD3	60S ribosomal export protein NMD3 OS=Homo sapiens OX=9606 GN=NMD3 PE=1 SV=1	206	10	6.07805	6.75133	7.12612	6.49528	0.151563	0.0779461	0.229509	-0.133727	0.0957829
	sp|O15381|NVL_HUMAN	NVL	Nuclear valosin-containing protein-like OS=Homo sapiens OX=9606 GN=NVL PE=1 SV=1	4229	2	7.1367	7.92707	6.81159	6.96959	0.151531	-0.218796	-0.0672652	0.0330825	-0.0341827
	sp|P30405|PPIF_HUMAN	PPIF	Peptidyl-prolyl cis-trans isomerase F, mitochondrial OS=Homo sapiens OX=9606 GN=PPIF PE=1 SV=1	875	6	6.6995	7.44102	7.1371	5.70955	0.151446	-0.0601614	0.0912842	-0.32196	-0.230676
	sp|Q9H061|T126A_HUMAN	TMEM126A	Transmembrane protein 126A OS=Homo sapiens OX=9606 GN=TMEM126A PE=1 SV=1	3211	5	6.00823	6.67248	6.94349	6.62119	0.151283	0.0574379	0.208721	-0.0685711	0.14015
	tr|J3KQY1|J3KQY1_HUMAN	MRPL22	39S ribosomal protein L22, mitochondrial OS=Homo sapiens OX=9606 GN=MRPL22 PE=1 SV=1	1984	5	6.16511	6.84634	7.94607	5.49015	0.151208	0.214908	0.366116	-0.533398	-0.167282
	sp|Q9NZM3|ITSN2_HUMAN	ITSN2	Intersectin-2 OS=Homo sapiens OX=9606 GN=ITSN2 PE=1 SV=3	2457	6	7.19195	7.98574	6.80328	6.82363	0.151042	-0.231195	-0.0801528	0.0043086	-0.0758442
	sp|Q9BVV7|TIM21_HUMAN	TIMM21	Mitochondrial import inner membrane translocase subunit Tim21 OS=Homo sapiens OX=9606 GN=TIMM21 PE=1 SV=1	1743	5	6.29539	6.98941	7.43257	5.85832	0.150875	0.0886911	0.239566	-0.343375	-0.103809
	sp|Q7L1Q6-3|BZW1_HUMAN	BZW1	Isoform 3 of Basic leucine zipper and W2 domain-containing protein 1 OS=Homo sapiens OX=9606 GN=BZW1	818	13	5.99081	6.65079	5.8712	6.23072	0.150775	-0.179871	-0.0290957	0.0857423	0.0566466
	sp|Q9BRA0-2|LSMD1_HUMAN	NAA38	Isoform 2 of N-alpha-acetyltransferase 38, NatC auxiliary subunit OS=Homo sapiens OX=9606 GN=NAA38	3600	2	6.73578	7.47692	7.1702	6.74657	0.150599	-0.0604314	0.0901676	-0.0878581	0.00230955
	sp|Q9BQ75|CMS1_HUMAN	CMSS1	Protein CMSS1 OS=Homo sapiens OX=9606 GN=CMSS1 PE=1 SV=2	2259	2	6.40265	7.10701	6.40556	6.43207	0.150573	-0.149918	0.000654804	0.00595916	0.00661396
	sp|O95202|LETM1_HUMAN	LETM1	Mitochondrial proton/calcium exchanger protein OS=Homo sapiens OX=9606 GN=LETM1 PE=1 SV=1	326	16	5.82403	6.46471	6.7619	6.47812	0.150568	0.0648434	0.215411	-0.0618538	0.153557
	sp|O60239|3BP5_HUMAN	SH3BP5	SH3 domain-binding protein 5 OS=Homo sapiens OX=9606 GN=SH3BP5 PE=1 SV=2	441	3	4.53903	5.0381	5.40331	6.95782	0.150497	0.100963	0.25146	0.36479	0.61625
	sp|P32455|GBP1_HUMAN	GBP1	Guanylate-binding protein 1 OS=Homo sapiens OX=9606 GN=GBP1 PE=1 SV=2	1071	14	7.35056	8.15829	6.60706	5.52586	0.150412	-0.304257	-0.153845	-0.257811	-0.411656
	sp|P31946|1433B_HUMAN	YWHAB	14-3-3 protein beta/alpha OS=Homo sapiens OX=9606 GN=YWHAB PE=1 SV=3	177	12	5.74445	6.37564	5.93598	6.47164	0.150401	-0.103084	0.0473162	0.124644	0.171961
	sp|P01112|RASH_HUMAN	HRAS	GTPase HRas OS=Homo sapiens OX=9606 GN=HRAS PE=1 SV=1	4226	5	6.51145	7.22613	6.92928	8.60579	0.150244	-0.0605178	0.0897266	0.312602	0.402329
	sp|Q3ZCQ8-2|TIM50_HUMAN	TIMM50	Isoform 2 of Mitochondrial import inner membrane translocase subunit TIM50 OS=Homo sapiens OX=9606 GN=TIMM50	2339	9	6.58755	7.30991	6.82722	6.38267	0.150112	-0.0985547	0.0515569	-0.0971378	-0.0455808
	sp|P67809|YBOX1_HUMAN	YBX1	Nuclease-sensitive element-binding protein 1 OS=Homo sapiens OX=9606 GN=YBX1 PE=1 SV=3	3837	5	7.18389	7.97115	6.79781	6.87401	0.150023	-0.229718	-0.0796952	0.0160809	-0.0636144
	sp|O15431|COPT1_HUMAN	SLC31A1	High affinity copper uptake protein 1 OS=Homo sapiens OX=9606 GN=SLC31A1 PE=1 SV=1	3028	2	7.03925	7.81018	6.92295	6.95699	0.149934	-0.173969	-0.0240348	0.00707562	-0.0169592
	tr|B4E0T2|B4E0T2_HUMAN	PEX5	Peroxisomal targeting signal 1 receptor OS=Homo sapiens OX=9606 GN=PEX5 PE=1 SV=1	1863	10	5.80981	6.44549	6.46764	7.16828	0.149801	0.00494859	0.154749	0.148388	0.303137
	sp|Q9H9Y6-3|RPA2_HUMAN	POLR1B	Isoform 3 of DNA-directed RNA polymerase I subunit RPA2 OS=Homo sapiens OX=9606 GN=POLR1B	3231	6	6.76476	7.50285	6.74318	5.52971	0.149399	-0.154009	-0.00461071	-0.286225	-0.290836
	sp|O14907|TX1B3_HUMAN	TAX1BP3	Tax1-binding protein 3 OS=Homo sapiens OX=9606 GN=TAX1BP3 PE=1 SV=2	2987	3	5.98778	6.64012	7.34955	9.0095	0.149188	0.146447	0.295635	0.29379	0.589425
	sp|P62937|PPIA_HUMAN	PPIA	Peptidyl-prolyl cis-trans isomerase A OS=Homo sapiens OX=9606 GN=PPIA PE=1 SV=2	2111	20	6.22659	6.90364	6.46735	6.59133	0.148913	-0.094183	0.0547305	0.027396	0.0821265
	sp|P32019|I5P2_HUMAN	INPP5B	Type II inositol 1,4,5-trisphosphate 5-phosphatase OS=Homo sapiens OX=9606 GN=INPP5B PE=1 SV=4	1270	2	6.93686	7.69075	6.52972	8.46944	0.14884	-0.236103	-0.0872631	0.375246	0.287983
	sp|Q16740|CLPP_HUMAN	CLPP	ATP-dependent Clp protease proteolytic subunit, mitochondrial OS=Homo sapiens OX=9606 GN=CLPP PE=1 SV=1	2051	9	6.27558	6.95741	6.60346	6.8041	0.148802	-0.0753282	0.0734741	0.0431815	0.116656
	sp|Q04637-9|IF4G1_HUMAN	EIF4G1	Isoform 9 of Eukaryotic translation initiation factor 4 gamma 1 OS=Homo sapiens OX=9606 GN=EIF4G1	1649	22	6.55297	7.26472	6.69862	6.5204	0.148758	-0.117042	0.0317161	-0.0389045	-0.00718846
	sp|O15439|MRP4_HUMAN	ABCC4	Multidrug resistance-associated protein 4 OS=Homo sapiens OX=9606 GN=ABCC4 PE=1 SV=3	831	8	6.14541	6.81281	7.59266	6.63013	0.148742	0.156354	0.305096	-0.195569	0.109528
	sp|Q14444|CAPR1_HUMAN	CAPRIN1	Caprin-1 OS=Homo sapiens OX=9606 GN=CAPRIN1 PE=1 SV=2	3846	9	6.49166	7.1963	6.47731	6.44696	0.148667	-0.151861	-0.00319376	-0.00677539	-0.00996915
	sp|P82664|RT10_HUMAN	MRPS10	28S ribosomal protein S10, mitochondrial OS=Homo sapiens OX=9606 GN=MRPS10 PE=1 SV=2	5007	4	4.96178	5.50029	6.00651	4.70326	0.148648	0.12702	0.275668	-0.352867	-0.0771992
	sp|P29353-6|SHC1_HUMAN	SHC1	Isoform 6 of SHC-transforming protein 1 OS=Homo sapiens OX=9606 GN=SHC1	98	6	6.73621	7.46624	6.29565	6.11163	0.148444	-0.246026	-0.0975818	-0.0427981	-0.14038
	sp|Q96PE3|INP4A_HUMAN	INPP4A	Inositol polyphosphate-4-phosphatase type I A OS=Homo sapiens OX=9606 GN=INPP4A PE=1 SV=1	5175	8	6.45387	7.15312	7.53731	6.97759	0.148407	0.0754771	0.223885	-0.11132	0.112564
	sp|Q9Y291|RT33_HUMAN	MRPS33	28S ribosomal protein S33, mitochondrial OS=Homo sapiens OX=9606 GN=MRPS33 PE=1 SV=1	6251	2	5.9189	6.55983	7.25884	5.26591	0.148328	0.146082	0.294409	-0.463055	-0.168646
	sp|Q99471|PFD5_HUMAN	PFDN5	Prefoldin subunit 5 OS=Homo sapiens OX=9606 GN=PFDN5 PE=1 SV=2	3594	6	5.74752	6.36975	6.21476	5.84337	0.148296	-0.0355385	0.112757	-0.0888969	0.0238602
	sp|Q9Y2Z4|SYYM_HUMAN	YARS2	Tyrosine--tRNA ligase, mitochondrial OS=Homo sapiens OX=9606 GN=YARS2 PE=1 SV=2	1393	2	6.50674	7.21107	7.49965	6.92433	0.148278	0.0566112	0.204889	-0.115148	0.0897406
	sp|Q9NYI0|PSD3_HUMAN	PSD3	PH and SEC7 domain-containing protein 3 OS=Homo sapiens OX=9606 GN=PSD3 PE=1 SV=2	3866	3	6.44477	7.14129	5.39987	7.67582	0.148055	-0.403261	-0.255206	0.507397	0.252191
	sp|Q9BYD2|RM09_HUMAN	MRPL9	39S ribosomal protein L9, mitochondrial OS=Homo sapiens OX=9606 GN=MRPL9 PE=1 SV=2	1347	9	5.24492	5.81056	6.61364	4.81583	0.147756	0.186767	0.334523	-0.457661	-0.123138
	tr|B0QY95|B0QY95_HUMAN	MIEF1	Mitochondrial dynamics protein MID51 OS=Homo sapiens OX=9606 GN=MIEF1 PE=1 SV=1	274	4	6.99411	7.74684	7.05715	6.71711	0.147467	-0.134523	0.0129448	-0.0712454	-0.0583005
	sp|Q9NQR4|NIT2_HUMAN	NIT2	Omega-amidase NIT2 OS=Homo sapiens OX=9606 GN=NIT2 PE=1 SV=1	1481	18	5.80895	6.43179	6.50346	6.8293	0.146944	0.0159875	0.162931	0.0705281	0.233459
	sp|Q86UP2|KTN1_HUMAN	KTN1	Kinectin OS=Homo sapiens OX=9606 GN=KTN1 PE=1 SV=1	211	24	6.47966	7.17428	6.93672	6.82933	0.146917	-0.0485794	0.0983373	-0.0225106	0.0758267
	sp|Q9NX20|RM16_HUMAN	MRPL16	39S ribosomal protein L16, mitochondrial OS=Homo sapiens OX=9606 GN=MRPL16 PE=1 SV=1	3173	3	5.94427	6.58111	8.47154	5.7973	0.146831	0.364294	0.511125	-0.547242	-0.0361164
	tr|A0A2R8YEC9|A0A2R8YEC9_HUMAN	MANBA	Beta-mannosidase OS=Homo sapiens OX=9606 GN=MANBA PE=1 SV=1	4290	21	5.29371	5.86049	6.97388	7.60216	0.146741	0.25094	0.397681	0.124449	0.522129
	sp|Q9H6X2|ANTR1_HUMAN	ANTXR1	Anthrax toxin receptor 1 OS=Homo sapiens OX=9606 GN=ANTXR1 PE=1 SV=2	2411	8	5.86333	6.49097	6.75105	7.13047	0.146714	0.0566775	0.203391	0.0788853	0.282277
	sp|Q9NSY1|BMP2K_HUMAN	BMP2K	BMP-2-inducible protein kinase OS=Homo sapiens OX=9606 GN=BMP2K PE=1 SV=2	2353	6	5.22126	5.77919	5.6531	5.29305	0.146469	-0.0318247	0.114645	-0.0949434	0.0197013
	sp|Q9C0B7|TNG6_HUMAN	TANGO6	Transport and Golgi organization protein 6 homolog OS=Homo sapiens OX=9606 GN=TANGO6 PE=1 SV=2	2748	5	6.42378	7.1099	6.31773	6.33587	0.146408	-0.170422	-0.0240143	0.00413645	-0.0198779
	sp|Q5T8D3-3|ACBD5_HUMAN	ACBD5	Isoform 3 of Acyl-CoA-binding domain-containing protein 5 OS=Homo sapiens OX=9606 GN=ACBD5	4595	4	5.62311	6.22265	5.52734	5.01238	0.14616	-0.170943	-0.0247833	-0.14109	-0.165873
	sp|P00387-3|NB5R3_HUMAN	CYB5R3	Isoform 3 of NADH-cytochrome b5 reductase 3 OS=Homo sapiens OX=9606 GN=CYB5R3	2345	20	5.85145	6.47524	6.50365	6.41977	0.146139	0.00631632	0.152456	-0.0187273	0.133729
	sp|P61353|RL27_HUMAN	RPL27	60S ribosomal protein L27 OS=Homo sapiens OX=9606 GN=RPL27 PE=1 SV=2	6548	3	7.15864	7.92066	6.82147	6.91663	0.145936	-0.215538	-0.0696011	0.0199856	-0.0496156
	sp|Q96TA2|YMEL1_HUMAN	YME1L1	ATP-dependent zinc metalloprotease YME1L1 OS=Homo sapiens OX=9606 GN=YME1L1 PE=1 SV=2	4815	7	6.6164	7.31958	6.78488	6.00222	0.145716	-0.109439	0.0362769	-0.176826	-0.14055
	sp|Q92665|RT31_HUMAN	MRPS31	28S ribosomal protein S31, mitochondrial OS=Homo sapiens OX=9606 GN=MRPS31 PE=1 SV=3	4019	10	6.08446	6.72937	7.25265	5.47424	0.145341	0.108037	0.253379	-0.405851	-0.152473
	sp|P23634|AT2B4_HUMAN	ATP2B4	Plasma membrane calcium-transporting ATPase 4 OS=Homo sapiens OX=9606 GN=ATP2B4 PE=1 SV=2	2464	12	4.98713	5.5154	6.09004	5.84267	0.145254	0.142986	0.28824	-0.0598243	0.228416
	sp|P41252|SYIC_HUMAN	IARS	Isoleucine--tRNA ligase, cytoplasmic OS=Homo sapiens OX=9606 GN=IARS PE=1 SV=2	2390	20	6.41925	7.09865	6.75765	6.57033	0.145139	-0.0710241	0.0741151	-0.0405558	0.0335592
	sp|Q9Y3B9|RRP15_HUMAN	RRP15	RRP15-like protein OS=Homo sapiens OX=9606 GN=RRP15 PE=1 SV=2	5717	3	5.80257	6.41665	5.32251	5.35667	0.145129	-0.269714	-0.124584	0.00922967	-0.115355
	sp|Q5THJ4|VP13D_HUMAN	VPS13D	Vacuolar protein sorting-associated protein 13D OS=Homo sapiens OX=9606 GN=VPS13D PE=1 SV=2	1950	12	6.96915	7.70503	7.0712	6.77513	0.144818	-0.123844	0.0209737	-0.0617061	-0.0407323
	sp|Q9BRJ2|RM45_HUMAN	MRPL45	39S ribosomal protein L45, mitochondrial OS=Homo sapiens OX=9606 GN=MRPL45 PE=1 SV=2	4349	5	6.21064	6.86559	8.27099	5.57269	0.144643	0.268676	0.413319	-0.569687	-0.156367
	sp|Q5T6V5|QSPP_HUMAN	C9orf64	Queuosine salvage protein OS=Homo sapiens OX=9606 GN=C9orf64 PE=1 SV=1	3593	10	6.37913	7.05168	6.81507	6.36239	0.144607	-0.0492378	0.0953695	-0.0991592	-0.00378974
	sp|Q86Y79|PTH_HUMAN	PTRH1	Probable peptidyl-tRNA hydrolase OS=Homo sapiens OX=9606 GN=PTRH1 PE=1 SV=1	5852	4	4.82803	5.33616	4.46668	4.20897	0.144365	-0.256599	-0.112234	-0.0857363	-0.19797
	sp|Q16644|MAPK3_HUMAN	MAPKAPK3	MAP kinase-activated protein kinase 3 OS=Homo sapiens OX=9606 GN=MAPKAPK3 PE=1 SV=1	1834	3	6.14032	6.78578	6.44278	5.47101	0.144202	-0.0748306	0.069371	-0.235877	-0.166506
	sp|Q09666|AHNK_HUMAN	AHNAK	Neuroblast differentiation-associated protein AHNAK OS=Homo sapiens OX=9606 GN=AHNAK PE=1 SV=2	290	35	5.21679	5.76516	6.08506	10.6486	0.144198	0.0779096	0.222108	0.807319	1.02943
	sp|Q6NZI2|CAVN1_HUMAN	CAVIN1	Caveolae-associated protein 1 OS=Homo sapiens OX=9606 GN=CAVIN1 PE=1 SV=1	2744	18	5.96	6.58623	5.84628	7.01018	0.144142	-0.171933	-0.0277914	0.261931	0.23414
	sp|Q9GZL7|WDR12_HUMAN	WDR12	Ribosome biogenesis protein WDR12 OS=Homo sapiens OX=9606 GN=WDR12 PE=1 SV=2	2395	10	5.03137	5.55939	4.79611	5.01623	0.143975	-0.213061	-0.0690861	0.0647407	-0.00434539
	tr|A0A2R8Y5P7|A0A2R8Y5P7_HUMAN	HARS2	Probable histidine--tRNA ligase, mitochondrial OS=Homo sapiens OX=9606 GN=HARS2 PE=1 SV=1	303	19	5.76316	6.366	6.5201	6.2006	0.143528	0.0345058	0.178034	-0.0724859	0.105548
	tr|A0A087WZV0|A0A087WZV0_HUMAN	PPIP5K2	Inositol hexakisphosphate and diphosphoinositol-pentakisphosphate kinase OS=Homo sapiens OX=9606 GN=PPIP5K2 PE=1 SV=1	2273	9	6.46945	7.14595	6.93743	6.83894	0.143483	-0.0427245	0.100759	-0.0206282	0.0801307
	sp|P46937-7|YAP1_HUMAN	YAP1	Isoform 7 of Transcriptional coactivator YAP1 OS=Homo sapiens OX=9606 GN=YAP1	2228	5	6.95712	7.68356	6.6741	6.22901	0.143286	-0.203202	-0.0599162	-0.0995716	-0.159488
	tr|M0R2C6|M0R2C6_HUMAN		Uncharacterized protein (Fragment) OS=Homo sapiens OX=9606 PE=4 SV=1	544	8	6.27619	6.93129	6.7434	6.22969	0.143236	-0.039648	0.103588	-0.114315	-0.0107275
	tr|J3QLS3|J3QLS3_HUMAN	MRPS7	28S ribosomal protein S7, mitochondrial OS=Homo sapiens OX=9606 GN=MRPS7 PE=1 SV=1	5516	5	6.17019	6.81326	7.40608	5.87276	0.143032	0.120365	0.263397	-0.334672	-0.0712755
	sp|Q9Y244|POMP_HUMAN	POMP	Proteasome maturation protein OS=Homo sapiens OX=9606 GN=POMP PE=1 SV=1	2988	3	6.02667	6.65468	7.24938	6.06184	0.143009	0.123489	0.266498	-0.258103	0.0083955
	sp|P31930|QCR1_HUMAN	UQCRC1	Cytochrome b-c1 complex subunit 1, mitochondrial OS=Homo sapiens OX=9606 GN=UQCRC1 PE=1 SV=3	757	22	5.36406	5.92104	6.04143	5.70256	0.142526	0.0290387	0.171565	-0.0832791	0.0882856
	sp|Q9Y2S7|PDIP2_HUMAN	POLDIP2	Polymerase delta-interacting protein 2 OS=Homo sapiens OX=9606 GN=POLDIP2 PE=1 SV=1	4317	7	6.43432	7.10227	6.89779	6.21713	0.142493	-0.042146	0.100347	-0.149887	-0.0495401
	sp|Q9NQH7|XPP3_HUMAN	XPNPEP3	Xaa-Pro aminopeptidase 3 OS=Homo sapiens OX=9606 GN=XPNPEP3 PE=1 SV=1	723	6	6.1814	6.82236	7.05199	5.65386	0.142339	0.0477592	0.190098	-0.318796	-0.128698
	sp|Q9Y3D5|RT18C_HUMAN	MRPS18C	28S ribosomal protein S18c, mitochondrial OS=Homo sapiens OX=9606 GN=MRPS18C PE=1 SV=1	2497	3	6.21873	6.86238	8.14207	5.95214	0.142088	0.246687	0.388774	-0.451987	-0.0632123
	sp|Q6P4H8|ACKMT_HUMAN	ATPSCKMT	ATP synthase subunit C lysine N-methyltransferase OS=Homo sapiens OX=9606 GN=ATPSCKMT PE=1 SV=2	5783	2	6.4479	7.11445	7.60127	6.85267	0.141924	0.0954869	0.23741	-0.149575	0.0878358
	sp|P17987|TCPA_HUMAN	TCP1	T-complex protein 1 subunit alpha OS=Homo sapiens OX=9606 GN=TCP1 PE=1 SV=1	3592	14	6.39566	7.05593	6.84186	6.82992	0.141743	-0.0444473	0.0972957	-0.00251955	0.0947762
	tr|A0A3B3ISF0|A0A3B3ISF0_HUMAN	LARP1B	La-related protein 1B OS=Homo sapiens OX=9606 GN=LARP1B PE=1 SV=1	3013	2	6.83711	7.54194	7.08076	7.18914	0.141549	-0.0910318	0.0505172	0.0219136	0.0724309
	sp|P32119|PRDX2_HUMAN	PRDX2	Peroxiredoxin-2 OS=Homo sapiens OX=9606 GN=PRDX2 PE=1 SV=5	683	8	5.73076	6.32136	7.28848	6.25584	0.141508	0.205383	0.34689	-0.220415	0.126475
	sp|P48307|TFPI2_HUMAN	TFPI2	Tissue factor pathway inhibitor 2 OS=Homo sapiens OX=9606 GN=TFPI2 PE=1 SV=1	6064	5	9.2398	10.192	5.19785	5.25873	0.141503	-0.97145	-0.829947	0.0168013	-0.813146
	sp|P10809|CH60_HUMAN	HSPD1	60 kDa heat shock protein, mitochondrial OS=Homo sapiens OX=9606 GN=HSPD1 PE=1 SV=2	511	25	2.40861	2.65656	2.68668	2.62017	0.141362	0.0162634	0.157626	-0.0361641	0.121462
	sp|P54098|DPOG1_HUMAN	POLG	DNA polymerase subunit gamma-1 OS=Homo sapiens OX=9606 GN=POLG PE=1 SV=1	1871	7	2.44879	2.70077	2.60371	2.63795	0.141298	-0.0528012	0.0884968	0.0188466	0.107343
	tr|J3KN16|J3KN16_HUMAN	ECPAS	Proteasome adapter and scaffold protein ECM29 OS=Homo sapiens OX=9606 GN=ECPAS PE=1 SV=1	1355	17	6.37274	7.02816	6.55	6.4607	0.141233	-0.101652	0.0395815	-0.0198044	0.019777
	sp|Q9UKU0-8|ACSL6_HUMAN	ACSL6	Isoform 8 of Long-chain-fatty-acid--CoA ligase 6 OS=Homo sapiens OX=9606 GN=ACSL6	1659	2	6.85511	7.56001	7.59139	5.60311	0.14121	0.00597593	0.147186	-0.438137	-0.290951
	sp|P78318|IGBP1_HUMAN	IGBP1	Immunoglobulin-binding protein 1 OS=Homo sapiens OX=9606 GN=IGBP1 PE=1 SV=1	2791	2	6.24837	6.89015	6.61685	7.09867	0.141056	-0.0583901	0.0826654	0.101403	0.184069
	sp|Q9BYN8|RT26_HUMAN	MRPS26	28S ribosomal protein S26, mitochondrial OS=Homo sapiens OX=9606 GN=MRPS26 PE=1 SV=1	919	7	5.77586	6.36788	6.56569	5.67348	0.140777	0.0441339	0.18491	-0.210712	-0.0258018
	sp|P00813|ADA_HUMAN	ADA	Adenosine deaminase OS=Homo sapiens OX=9606 GN=ADA PE=1 SV=3	3077	15	4.47794	4.93533	4.21227	9.98287	0.140312	-0.228548	-0.0882361	1.24485	1.15662
	sp|Q9H444|CHM4B_HUMAN	CHMP4B	Charged multivesicular body protein 4b OS=Homo sapiens OX=9606 GN=CHMP4B PE=1 SV=1	253	11	6.13036	6.75418	6.58601	6.40449	0.13981	-0.0363759	0.103434	-0.0403229	0.0631108
	sp|P12235|ADT1_HUMAN	SLC25A4	ADP/ATP translocase 1 OS=Homo sapiens OX=9606 GN=SLC25A4 PE=1 SV=4	557	11	6.12478	6.74705	6.35989	6.67615	0.139599	-0.0852532	0.0543457	0.0700145	0.12436
	sp|Q92995|UBP13_HUMAN	USP13	Ubiquitin carboxyl-terminal hydrolase 13 OS=Homo sapiens OX=9606 GN=USP13 PE=1 SV=2	2788	5	5.66551	6.23963	6.9028	6.26506	0.139255	0.145721	0.284977	-0.139855	0.145122
	sp|O60783|RT14_HUMAN	MRPS14	28S ribosomal protein S14, mitochondrial OS=Homo sapiens OX=9606 GN=MRPS14 PE=1 SV=1	6034	3	6.38348	7.03032	7.83993	6.3595	0.139247	0.157252	0.296499	-0.301929	-0.00543017
	sp|Q9Y6W5|WASF2_HUMAN	WASF2	Wiskott-Aldrich syndrome protein family member 2 OS=Homo sapiens OX=9606 GN=WASF2 PE=1 SV=3	5775	5	6.55054	7.21398	7.38409	7.20094	0.139182	0.033625	0.172807	-0.0362352	0.136571
	sp|O95825|QORL1_HUMAN	CRYZL1	Quinone oxidoreductase-like protein 1 OS=Homo sapiens OX=9606 GN=CRYZL1 PE=1 SV=2	568	4	6.92291	7.62123	6.98384	7.23227	0.138646	-0.126004	0.0126423	0.0504294	0.0630716
	sp|Q92530|PSMF1_HUMAN	PSMF1	Proteasome inhibitor PI31 subunit OS=Homo sapiens OX=9606 GN=PSMF1 PE=1 SV=2	1931	6	5.57946	6.14146	5.25424	6.77724	0.138456	-0.2251	-0.0866443	0.367215	0.28057
	tr|C9J406|C9J406_HUMAN	IMMT	MICOS complex subunit MIC60 OS=Homo sapiens OX=9606 GN=IMMT PE=1 SV=1	351	2	4.76493	5.24452	5.36446	5.64079	0.138357	0.0326231	0.17098	0.0724634	0.243443
	sp|Q96QD9|UIF_HUMAN	FYTTD1	UAP56-interacting factor OS=Homo sapiens OX=9606 GN=FYTTD1 PE=1 SV=3	5832	6	6.073	6.68347	6.44716	6.06726	0.138188	-0.0519343	0.0862537	-0.0876191	-0.00136542
	sp|P18031|PTN1_HUMAN	PTPN1	Tyrosine-protein phosphatase non-receptor type 1 OS=Homo sapiens OX=9606 GN=PTPN1 PE=1 SV=1	3131	11	6.46585	7.11543	6.22247	5.50818	0.138109	-0.193464	-0.0553542	-0.175911	-0.231265
	sp|Q8IVD9|NUDC3_HUMAN	NUDCD3	NudC domain-containing protein 3 OS=Homo sapiens OX=9606 GN=NUDCD3 PE=1 SV=3	3473	6	4.43992	4.88594	4.77906	4.66041	0.1381	-0.0319078	0.106193	-0.036272	0.0699206
	tr|I3L1Y9|I3L1Y9_HUMAN	FLYWCH2	FLYWCH family member 2 OS=Homo sapiens OX=9606 GN=FLYWCH2 PE=1 SV=1	1599	4	7.07722	7.78778	6.60859	7.0143	0.138029	-0.23687	-0.098841	0.0859556	-0.0128853
	tr|E7ETB3|E7ETB3_HUMAN	DNPEP	Aspartyl aminopeptidase OS=Homo sapiens OX=9606 GN=DNPEP PE=1 SV=2	4058	10	7.19087	7.91275	6.54745	6.0257	0.138013	-0.273246	-0.135233	-0.119805	-0.255038
	sp|P52306-5|GDS1_HUMAN	RAP1GDS1	Isoform 5 of Rap1 GTPase-GDP dissociation stimulator 1 OS=Homo sapiens OX=9606 GN=RAP1GDS1	1922	14	6.03547	6.64102	6.47019	7.16822	0.137939	-0.037596	0.100343	0.147805	0.248148
	sp|P05387|RLA2_HUMAN	RPLP2	60S acidic ribosomal protein P2 OS=Homo sapiens OX=9606 GN=RPLP2 PE=1 SV=1	6010	5	5.62792	6.19096	5.40353	5.42829	0.137561	-0.196262	-0.0587009	0.00659472	-0.0521062
	sp|Q7L3B6|CD37L_HUMAN	CDC37L1	Hsp90 co-chaperone Cdc37-like 1 OS=Homo sapiens OX=9606 GN=CDC37L1 PE=1 SV=1	894	6	6.79247	7.47148	7.19283	7.02559	0.137458	-0.0548339	0.0826239	-0.0339408	0.0486831
	sp|Q9GZZ1|NAA50_HUMAN	NAA50	N-alpha-acetyltransferase 50 OS=Homo sapiens OX=9606 GN=NAA50 PE=1 SV=1	4348	10	6.59906	7.25801	6.45132	6.49552	0.137313	-0.169981	-0.032668	0.00985287	-0.0228151
	sp|Q96PU4|UHRF2_HUMAN	UHRF2	E3 ubiquitin-protein ligase UHRF2 OS=Homo sapiens OX=9606 GN=UHRF2 PE=1 SV=1	4541	2	6.83148	7.5127	6.51875	7.12675	0.137135	-0.204738	-0.0676032	0.12865	0.0610469
	sp|Q8TCT8|SPP2A_HUMAN	SPPL2A	Signal peptide peptidase-like 2A OS=Homo sapiens OX=9606 GN=SPPL2A PE=1 SV=2	3014	2	6.47186	7.11539	7.2143	7.97621	0.136763	0.0199166	0.15668	0.144842	0.301522
	sp|Q96LJ7|DHRS1_HUMAN	DHRS1	Dehydrogenase/reductase SDR family member 1 OS=Homo sapiens OX=9606 GN=DHRS1 PE=1 SV=1	3484	5	6.39841	7.03422	6.33378	7.49192	0.136678	-0.151324	-0.0146463	0.242269	0.227623
	sp|Q9UKA4|AKA11_HUMAN	AKAP11	A-kinase anchor protein 11 OS=Homo sapiens OX=9606 GN=AKAP11 PE=1 SV=1	4898	7	5.77924	6.35342	6.38446	5.16778	0.136654	0.0070297	0.143684	-0.305019	-0.161335
	sp|Q13033|STRN3_HUMAN	STRN3	Striatin-3 OS=Homo sapiens OX=9606 GN=STRN3 PE=1 SV=3	822	15	5.98045	6.57216	6.024	6.08381	0.136115	-0.125646	0.0104693	0.0142537	0.024723
	sp|O75886|STAM2_HUMAN	STAM2	Signal transducing adapter molecule 2 OS=Homo sapiens OX=9606 GN=STAM2 PE=1 SV=1	1612	5	5.54209	6.09015	6.056	7.16446	0.136048	-0.00811295	0.127936	0.242493	0.370429
	sp|Q15061|WDR43_HUMAN	WDR43	WD repeat-containing protein 43 OS=Homo sapiens OX=9606 GN=WDR43 PE=1 SV=3	3820	5	6.60507	7.25816	5.99211	6.81198	0.13603	-0.27654	-0.14051	0.185009	0.0444986
	tr|J3KQ18|J3KQ18_HUMAN	DDT	D-dopachrome decarboxylase OS=Homo sapiens OX=9606 GN=DDT PE=1 SV=1	4837	3	7.06461	7.76094	7.03564	6.65478	0.135621	-0.14155	-0.00592928	-0.0802897	-0.0862189
	sp|P62241|RS8_HUMAN	RPS8	40S ribosomal protein S8 OS=Homo sapiens OX=9606 GN=RPS8 PE=1 SV=2	720	13	6.80127	7.47152	6.23396	6.31611	0.135598	-0.261254	-0.125656	0.0188893	-0.106767
	sp|Q9BQA1|MEP50_HUMAN	WDR77	Methylosome protein 50 OS=Homo sapiens OX=9606 GN=WDR77 PE=1 SV=1	3488	7	6.26999	6.8866	6.55057	6.03364	0.135329	-0.0721718	0.0631577	-0.118591	-0.0554333
	sp|Q9Y2U5|M3K2_HUMAN	MAP3K2	Mitogen-activated protein kinase kinase kinase 2 OS=Homo sapiens OX=9606 GN=MAP3K2 PE=1 SV=2	2265	2	6.2484	6.86178	6.21621	6.09919	0.135095	-0.142547	-0.00745234	-0.0274164	-0.0348687
	sp|Q6UW68|TM205_HUMAN	TMEM205	Transmembrane protein 205 OS=Homo sapiens OX=9606 GN=TMEM205 PE=1 SV=1	5682	2	6.96611	7.64986	7.51434	5.53303	0.13508	-0.025786	0.109294	-0.441578	-0.332284
	sp|P10644|KAP0_HUMAN	PRKAR1A	cAMP-dependent protein kinase type I-alpha regulatory subunit OS=Homo sapiens OX=9606 GN=PRKAR1A PE=1 SV=1	4106	15	6.19927	6.80733	6.87932	6.02374	0.13499	0.0151783	0.150168	-0.191608	-0.04144
	sp|Q8N128-2|F177A_HUMAN	FAM177A1	Isoform 2 of Protein FAM177A1 OS=Homo sapiens OX=9606 GN=FAM177A1	494	6	5.03268	5.5254	5.25233	4.73129	0.134752	-0.0731208	0.0616311	-0.150725	-0.0890942
	sp|Q9NVH0|EXD2_HUMAN	EXD2	Exonuclease 3'-5' domain-containing protein 2 OS=Homo sapiens OX=9606 GN=EXD2 PE=1 SV=2	1987	5	5.09047	5.5886	5.70069	4.77627	0.134688	0.0286496	0.163338	-0.255251	-0.0919135
	sp|P26640|SYVC_HUMAN	VARS	Valine--tRNA ligase OS=Homo sapiens OX=9606 GN=VARS PE=1 SV=4	446	22	6.09024	6.6855	6.16827	5.66267	0.134538	-0.116171	0.0183672	-0.123383	-0.105016
	sp|P08319-2|ADH4_HUMAN	ADH4	Isoform 2 of All-trans-retinol dehydrogenase [NAD(+)] ADH4 OS=Homo sapiens OX=9606 GN=ADH4	529	6	5.95584	6.5379	7.27729	2.81884	0.134524	0.154572	0.289096	-1.3683	-1.0792
	sp|P06132|DCUP_HUMAN	UROD	Uroporphyrinogen decarboxylase OS=Homo sapiens OX=9606 GN=UROD PE=1 SV=2	404	4	6.29516	6.91031	6.08327	5.92167	0.134508	-0.183903	-0.0493952	-0.0388429	-0.0882382
	sp|O75094|SLIT3_HUMAN	SLIT3	Slit homolog 3 protein OS=Homo sapiens OX=9606 GN=SLIT3 PE=2 SV=3	1683	18	5.67692	6.23158	6.90587	7.37803	0.13449	0.148224	0.282715	0.0954122	0.378127
	sp|Q8N5C7|DTWD1_HUMAN	DTWD1	DTW domain-containing protein 1 OS=Homo sapiens OX=9606 GN=DTWD1 PE=1 SV=1	3851	3	6.58148	7.22452	6.02291	6.72363	0.134489	-0.26244	-0.127951	0.15878	0.0308294
	sp|Q9ULI3|HEG1_HUMAN	HEG1	Protein HEG homolog 1 OS=Homo sapiens OX=9606 GN=HEG1 PE=1 SV=3	580	9	6.27405	6.8862	6.52417	6.61046	0.13431	-0.0779123	0.0563981	0.0189556	0.0753536
	sp|Q9BTY2|FUCO2_HUMAN	FUCA2	Plasma alpha-L-fucosidase OS=Homo sapiens OX=9606 GN=FUCA2 PE=1 SV=2	4863	5	7.20108	7.90122	5.51303	4.18126	0.133863	-0.519231	-0.385368	-0.398907	-0.784276
	sp|Q96RS6|NUDC1_HUMAN	NUDCD1	NudC domain-containing protein 1 OS=Homo sapiens OX=9606 GN=NUDCD1 PE=1 SV=2	4218	11	5.93521	6.51197	6.07691	5.38298	0.133795	-0.0997557	0.0340392	-0.174932	-0.140893
	sp|Q9UHP3-3|UBP25_HUMAN	USP25	Isoform USP25m of Ubiquitin carboxyl-terminal hydrolase 25 OS=Homo sapiens OX=9606 GN=USP25	2483	9	7.01918	7.69994	6.91697	7.17041	0.133544	-0.154707	-0.021163	0.0519144	0.0307514
	sp|O76024|WFS1_HUMAN	WFS1	Wolframin OS=Homo sapiens OX=9606 GN=WFS1 PE=1 SV=2	1700	11	5.75046	6.30742	6.83152	7.08897	0.133373	0.115156	0.248529	0.0533691	0.301898
	sp|Q92503-2|S14L1_HUMAN	SEC14L1	Isoform 2 of SEC14-like protein 1 OS=Homo sapiens OX=9606 GN=SEC14L1	4412	3	6.83019	7.49122	7.02378	7.44653	0.133275	-0.092953	0.0403219	0.084319	0.124641
	sp|Q01201|RELB_HUMAN	RELB	Transcription factor RelB OS=Homo sapiens OX=9606 GN=RELB PE=1 SV=2	4558	2	7.59048	8.32505	6.81767	5.67367	0.133267	-0.28818	-0.154913	-0.264997	-0.41991
	sp|O60678|ANM3_HUMAN	PRMT3	Protein arginine N-methyltransferase 3 OS=Homo sapiens OX=9606 GN=PRMT3 PE=1 SV=4	2924	6	6.56993	7.20553	6.65847	5.80168	0.133227	-0.113914	0.0193131	-0.198718	-0.179405
	sp|P57076|CF298_HUMAN	CFAP298	Cilia- and flagella-associated protein 298 OS=Homo sapiens OX=9606 GN=CFAP298 PE=1 SV=1	4440	4	3.96151	4.34449	4.12248	3.98911	0.133134	-0.0756721	0.057462	-0.0474486	0.0100134
	sp|Q86X02|CDR2L_HUMAN	CDR2L	Cerebellar degeneration-related protein 2-like OS=Homo sapiens OX=9606 GN=CDR2L PE=1 SV=2	731	3	5.31967	5.83367	6.13336	6.07192	0.133067	0.0722747	0.205342	-0.014526	0.190816
	sp|Q8N8A6|DDX51_HUMAN	DDX51	ATP-dependent RNA helicase DDX51 OS=Homo sapiens OX=9606 GN=DDX51 PE=1 SV=3	4994	2	7.36409	8.07468	6.95461	5.97803	0.132897	-0.215436	-0.0825383	-0.2183	-0.300838
	sp|Q86TV6-2|TTC7B_HUMAN	TTC7B	Isoform 2 of Tetratricopeptide repeat protein 7B OS=Homo sapiens OX=9606 GN=TTC7B	1565	2	5.63101	6.17406	5.45087	6.5139	0.132827	-0.179733	-0.0469063	0.257034	0.210128
	tr|G3V3G9|G3V3G9_HUMAN		WD_REPEATS_REGION domain-containing protein OS=Homo sapiens OX=9606 PE=1 SV=1	4354	10	6.74905	7.39981	6.87987	6.35205	0.132804	-0.105107	0.0276976	-0.11516	-0.0874626
	sp|P53396|ACLY_HUMAN	ACLY	ATP-citrate synthase OS=Homo sapiens OX=9606 GN=ACLY PE=1 SV=3	687	29	6.54401	7.1749	5.92604	6.17036	0.132784	-0.275891	-0.143107	0.0582847	-0.0848222
	sp|Q86W92|LIPB1_HUMAN	PPFIBP1	Liprin-beta-1 OS=Homo sapiens OX=9606 GN=PPFIBP1 PE=1 SV=2	317	13	6.71482	7.36218	6.52889	7.95703	0.132784	-0.173294	-0.0405099	0.285392	0.244882
	sp|Q9BVM2|DPCD_HUMAN	DPCD	Protein DPCD OS=Homo sapiens OX=9606 GN=DPCD PE=1 SV=2	4378	6	6.11844	6.70777	6.92936	6.60565	0.132669	0.0468892	0.179558	-0.0690219	0.110536
	sp|Q969Y2-2|GTPB3_HUMAN	GTPBP3	Isoform 2 of tRNA modification GTPase GTPBP3, mitochondrial OS=Homo sapiens OX=9606 GN=GTPBP3	3955	2	5.66992	6.21545	5.55963	6.03316	0.132532	-0.16087	-0.0283382	0.117925	0.0895863
	sp|P35555|FBN1_HUMAN	FBN1	Fibrillin-1 OS=Homo sapiens OX=9606 GN=FBN1 PE=1 SV=4	2740	26	4.28064	4.69207	6.87452	5.51235	0.132399	0.551034	0.683433	-0.318591	0.364842
	sp|O14548|COX7R_HUMAN	COX7A2L	Cytochrome c oxidase subunit 7A-related protein, mitochondrial OS=Homo sapiens OX=9606 GN=COX7A2L PE=1 SV=2	716	3	6.40327	7.01846	6.27118	6.3719	0.132346	-0.162418	-0.0300712	0.0229867	-0.00708447
	sp|O15121|DEGS1_HUMAN	DEGS1	Sphingolipid delta(4)-desaturase DES1 OS=Homo sapiens OX=9606 GN=DEGS1 PE=1 SV=1	4546	2	7.12034	7.80436	6.97866	6.67696	0.132335	-0.16133	-0.0289947	-0.0637593	-0.0927541
	sp|P42574|CASP3_HUMAN	CASP3	Caspase-3 OS=Homo sapiens OX=9606 GN=CASP3 PE=1 SV=2	4624	3	6.73937	7.38564	7.30074	6.91026	0.132111	-0.0166812	0.115429	-0.0793013	0.036128
	tr|X6R5Z6|X6R5Z6_HUMAN	COA6	Cytochrome c oxidase assembly factor 6 homolog OS=Homo sapiens OX=9606 GN=COA6 PE=1 SV=1	3288	4	5.9534	6.5239	6.33976	5.14921	0.132019	-0.0413065	0.0907128	-0.300076	-0.209364
	sp|Q8IWB1|IPRI_HUMAN	ITPRIP	Inositol 1,4,5-trisphosphate receptor-interacting protein OS=Homo sapiens OX=9606 GN=ITPRIP PE=1 SV=1	700	10	6.47117	7.09088	7.39804	7.44907	0.131938	0.0611784	0.193117	0.0099169	0.203034
	tr|A8MUH2|A8MUH2_HUMAN	ATP5PF	ATP synthase-coupling factor 6, mitochondrial OS=Homo sapiens OX=9606 GN=ATP5PF PE=1 SV=1	4849	2	6.74322	7.38777	7.19155	7.22885	0.131702	-0.0388372	0.0928647	0.00746474	0.100329
	sp|Q5SWX8|ODR4_HUMAN	ODR4	Protein odr-4 homolog OS=Homo sapiens OX=9606 GN=ODR4 PE=1 SV=1	1282	13	6.52961	7.15201	6.64792	6.5031	0.131352	-0.105447	0.0259044	-0.0317754	-0.00587106
	tr|G5EA30|G5EA30_HUMAN	CELF1	CUG triplet repeat, RNA binding protein 1, isoform CRA_c OS=Homo sapiens OX=9606 GN=CELF1 PE=1 SV=1	299	6	5.68063	6.22101	4.6741	5.18152	0.131098	-0.412462	-0.281364	0.148687	-0.132677
	sp|Q02878|RL6_HUMAN	RPL6	60S ribosomal protein L6 OS=Homo sapiens OX=9606 GN=RPL6 PE=1 SV=3	1687	6	7.06271	7.73372	6.67969	6.73844	0.130941	-0.211381	-0.0804407	0.0126328	-0.0678079
	sp|Q9NVH1|DJC11_HUMAN	DNAJC11	DnaJ homolog subfamily C member 11 OS=Homo sapiens OX=9606 GN=DNAJC11 PE=1 SV=2	1364	13	6.03803	6.61051	6.92431	6.30594	0.130685	0.0669077	0.197593	-0.134957	0.0626355
	sp|P62269|RS18_HUMAN	RPS18	40S ribosomal protein S18 OS=Homo sapiens OX=9606 GN=RPS18 PE=1 SV=3	726	6	6.93635	7.59376	6.78763	6.59911	0.130638	-0.161907	-0.0312691	-0.0406368	-0.0719059
	sp|Q9BVS4|RIOK2_HUMAN	RIOK2	Serine/threonine-protein kinase RIO2 OS=Homo sapiens OX=9606 GN=RIOK2 PE=1 SV=2	4695	8	7.1355	7.81022	6.45238	6.85534	0.130349	-0.275533	-0.145185	0.0873965	-0.057788
	sp|Q9BQG0-2|MBB1A_HUMAN	MYBBP1A	Isoform 2 of Myb-binding protein 1A OS=Homo sapiens OX=9606 GN=MYBBP1A	1305	18	7.25046	7.93594	6.68101	6.35335	0.130328	-0.248336	-0.118008	-0.0725491	-0.190557
	tr|E5RHG6|E5RHG6_HUMAN	TBCA	Tubulin-specific chaperone A OS=Homo sapiens OX=9606 GN=TBCA PE=1 SV=2	872	4	6.47431	7.0859	7.31461	7.01117	0.130223	0.0458295	0.176053	-0.0611258	0.114927
	sp|O00481|BT3A1_HUMAN	BTN3A1	Butyrophilin subfamily 3 member A1 OS=Homo sapiens OX=9606 GN=BTN3A1 PE=1 SV=3	5008	3	6.84335	7.48914	7.12894	7.11446	0.130097	-0.0711132	0.0589842	-0.00293265	0.0560515
	sp|Q99832|TCPH_HUMAN	CCT7	T-complex protein 1 subunit eta OS=Homo sapiens OX=9606 GN=CCT7 PE=1 SV=2	1856	16	4.76062	5.20986	4.94248	4.94423	0.130096	-0.0760094	0.0540866	0.000509756	0.0545964
	sp|P48163|MAOX_HUMAN	ME1	NADP-dependent malic enzyme OS=Homo sapiens OX=9606 GN=ME1 PE=1 SV=1	2133	16	6.12229	6.69963	7.54885	5.53829	0.130009	0.172177	0.302185	-0.446816	-0.14463
	sp|Q5PRF9|SMAG2_HUMAN	SAMD4B	Protein Smaug homolog 2 OS=Homo sapiens OX=9606 GN=SAMD4B PE=1 SV=1	3771	4	5.68616	6.22234	6.73999	7.06687	0.130002	0.115289	0.245291	0.068326	0.313617
	sp|Q8WU79|SMAP2_HUMAN	SMAP2	Stromal membrane-associated protein 2 OS=Homo sapiens OX=9606 GN=SMAP2 PE=1 SV=1	3966	3	5.02946	5.50366	4.83195	5.14412	0.129987	-0.187785	-0.0577979	0.0903178	0.0325198
	sp|Q9H3S4|TPK1_HUMAN	TPK1	Thiamin pyrophosphokinase 1 OS=Homo sapiens OX=9606 GN=TPK1 PE=1 SV=1	5079	4	6.76969	7.40788	7.52538	6.15756	0.129971	0.0227031	0.152674	-0.289405	-0.136731
	sp|Q9H7U1-3|CCSE2_HUMAN	CCSER2	Isoform 3 of Serine-rich coiled-coil domain-containing protein 2 OS=Homo sapiens OX=9606 GN=CCSER2	6538	3	5.7255	6.2652	6.386	6.36252	0.12996	0.0275505	0.157511	-0.00531351	0.152197
	sp|Q6NXT6|TAPT1_HUMAN	TAPT1	Transmembrane anterior posterior transformation protein 1 homolog OS=Homo sapiens OX=9606 GN=TAPT1 PE=1 SV=1	3938	5	6.86813	7.51548	7.08713	7.16318	0.129948	-0.0846634	0.0452845	0.0153967	0.0606811
	sp|Q7L576|CYFP1_HUMAN	CYFIP1	Cytoplasmic FMR1-interacting protein 1 OS=Homo sapiens OX=9606 GN=CYFIP1 PE=1 SV=1	2032	15	6.03155	6.59952	6.70596	6.89916	0.129832	0.0230817	0.152914	0.0409782	0.193892
	sp|Q8NEF9|SRFB1_HUMAN	SRFBP1	Serum response factor-binding protein 1 OS=Homo sapiens OX=9606 GN=SRFBP1 PE=1 SV=1	4270	3	6.68332	7.31248	6.35275	5.97098	0.129797	-0.202981	-0.0731837	-0.0894128	-0.162596
	sp|Q9UPY3|DICER_HUMAN	DICER1	Endoribonuclease Dicer OS=Homo sapiens OX=9606 GN=DICER1 PE=1 SV=3	3709	3	6.27618	6.86675	5.58838	6.47608	0.129741	-0.297197	-0.167457	0.21269	0.0452333
	sp|Q9BUR5|MIC26_HUMAN	APOO	MICOS complex subunit MIC26 OS=Homo sapiens OX=9606 GN=APOO PE=1 SV=1	5843	2	4.20366	4.59874	4.85412	4.59956	0.129595	0.0779706	0.207565	-0.077716	0.129849
	tr|D3DQV9|D3DQV9_HUMAN	EIF4G2	Eukaryotic translation initiation factor 4 gamma 2 (Fragment) OS=Homo sapiens OX=9606 GN=EIF4G2 PE=1 SV=1	4000	21	6.34099	6.93635	6.16952	6.46102	0.129469	-0.16902	-0.039551	0.0666052	0.0270542
	tr|J3QQX2|J3QQX2_HUMAN	ARHGDIA	Rho GDP-dissociation inhibitor 1 OS=Homo sapiens OX=9606 GN=ARHGDIA PE=1 SV=1	922	4	6.62316	7.24402	6.47215	6.83626	0.129271	-0.162545	-0.0332743	0.0789601	0.0456858
	sp|Q14914|PTGR1_HUMAN	PTGR1	Prostaglandin reductase 1 OS=Homo sapiens OX=9606 GN=PTGR1 PE=1 SV=2	2659	11	6.02766	6.59184	7.04182	6.31417	0.129084	0.0952664	0.22435	-0.157355	0.0669959
	sp|Q8WWC4|MAIP1_HUMAN	MAIP1	m-AAA protease-interacting protein 1, mitochondrial OS=Homo sapiens OX=9606 GN=MAIP1 PE=1 SV=1	4696	6	6.75411	7.38624	7.48268	6.34146	0.129074	0.018714	0.147788	-0.238738	-0.0909495
	sp|Q9Y617|SERC_HUMAN	PSAT1	Phosphoserine aminotransferase OS=Homo sapiens OX=9606 GN=PSAT1 PE=1 SV=2	1862	16	6.67452	7.29819	6.24921	9.18041	0.128875	-0.223864	-0.0949898	0.554884	0.459895
	sp|O43719|HTSF1_HUMAN	HTATSF1	HIV Tat-specific factor 1 OS=Homo sapiens OX=9606 GN=HTATSF1 PE=1 SV=1	898	9	6.64361	7.2641	7.2525	7.38094	0.128817	-0.00230567	0.126512	0.0253262	0.151838
	sp|Q02127|PYRD_HUMAN	DHODH	Dihydroorotate dehydrogenase (quinone), mitochondrial OS=Homo sapiens OX=9606 GN=DHODH PE=1 SV=3	4557	8	6.70652	7.33278	6.99164	5.29829	0.128795	-0.0687294	0.0600659	-0.400102	-0.340036
	sp|O95628-6|CNOT4_HUMAN	CNOT4	Isoform 6 of CCR4-NOT transcription complex subunit 4 OS=Homo sapiens OX=9606 GN=CNOT4	1768	2	6.79248	7.42607	7.16478	7.17781	0.12866	-0.0516765	0.076984	0.00262066	0.0796046
	sp|Q8TEV9|SMCR8_HUMAN	SMCR8	Guanine nucleotide exchange protein SMCR8 OS=Homo sapiens OX=9606 GN=SMCR8 PE=1 SV=2	1461	3	6.818	7.45392	7.62033	5.73111	0.128651	0.0318538	0.160504	-0.411039	-0.250535
	sp|Q9UHD1|CHRD1_HUMAN	CHORDC1	Cysteine and histidine-rich domain-containing protein 1 OS=Homo sapiens OX=9606 GN=CHORDC1 PE=1 SV=2	1046	9	6.28368	6.86962	7.07887	5.94558	0.128621	0.0432877	0.171909	-0.251701	-0.0797922
	sp|Q9BVA0|KTNB1_HUMAN	KATNB1	Katanin p80 WD40 repeat-containing subunit B1 OS=Homo sapiens OX=9606 GN=KATNB1 PE=1 SV=1	972	5	5.63466	6.15818	5.90527	5.95419	0.128175	-0.0605002	0.0676744	0.0119002	0.0795746
	sp|Q9H4B0|OSGP2_HUMAN	OSGEPL1	Probable tRNA N6-adenosine threonylcarbamoyltransferase, mitochondrial OS=Homo sapiens OX=9606 GN=OSGEPL1 PE=2 SV=2	1411	4	5.76323	6.29865	6.34106	5.51408	0.128164	0.009681	0.137845	-0.201603	-0.0637582
	sp|Q9NX58|LYAR_HUMAN	LYAR	Cell growth-regulating nucleolar protein OS=Homo sapiens OX=9606 GN=LYAR PE=1 SV=2	3766	5	4.95248	5.41211	4.55512	4.65049	0.12804	-0.248701	-0.120661	0.0298947	-0.0907659
	sp|P58335|ANTR2_HUMAN	ANTXR2	Anthrax toxin receptor 2 OS=Homo sapiens OX=9606 GN=ANTXR2 PE=1 SV=5	2411	3	6.37103	6.96105	5.81226	10.2372	0.127778	-0.260207	-0.132428	0.816658	0.68423
	sp|O94885|SASH1_HUMAN	SASH1	SAM and SH3 domain-containing protein 1 OS=Homo sapiens OX=9606 GN=SASH1 PE=1 SV=3	1387	17	6.45446	7.05149	6.98523	7.12359	0.127632	-0.0136198	0.114013	0.0282972	0.14231
	sp|Q9BW62|KATL1_HUMAN	KATNAL1	Katanin p60 ATPase-containing subunit A-like 1 OS=Homo sapiens OX=9606 GN=KATNAL1 PE=1 SV=1	1003	4	4.61784	5.04457	4.57044	5.21783	0.127512	-0.142398	-0.0148856	0.191116	0.176231
	sp|Q8WYL5|SSH1_HUMAN	SSH1	Protein phosphatase Slingshot homolog 1 OS=Homo sapiens OX=9606 GN=SSH1 PE=1 SV=2	4673	4	6.81568	7.4455	7.22298	6.93931	0.12751	-0.0437749	0.0837349	-0.057802	0.0259329
	sp|O75390|CISY_HUMAN	CS	Citrate synthase, mitochondrial OS=Homo sapiens OX=9606 GN=CS PE=1 SV=2	1911	14	5.55341	6.06647	5.92604	5.45499	0.127483	-0.0337873	0.0936961	-0.119494	-0.0257978
	sp|Q9UKA2|FBXL4_HUMAN	FBXL4	F-box/LRR-repeat protein 4 OS=Homo sapiens OX=9606 GN=FBXL4 PE=1 SV=2	3952	4	6.17175	6.74181	5.97554	6.25687	0.127457	-0.174068	-0.0466109	0.0663724	0.0197615
	sp|Q96EY5|MB12A_HUMAN	MVB12A	Multivesicular body subunit 12A OS=Homo sapiens OX=9606 GN=MVB12A PE=1 SV=1	4102	5	6.56502	7.17051	6.72584	6.88607	0.127276	-0.0923606	0.034915	0.0339667	0.0688818
	sp|Q16891|MIC60_HUMAN	IMMT	MICOS complex subunit MIC60 OS=Homo sapiens OX=9606 GN=IMMT PE=1 SV=1	351	24	5.25466	5.73866	5.81956	5.92786	0.127116	0.0201966	0.147313	0.0265988	0.173912
	sp|P56589|PEX3_HUMAN	PEX3	Peroxisomal biogenesis factor 3 OS=Homo sapiens OX=9606 GN=PEX3 PE=1 SV=1	3705	3	6.87749	7.51025	7.55268	5.76035	0.126978	0.00812901	0.135107	-0.390833	-0.255726
	sp|Q5T4S7|UBR4_HUMAN	UBR4	E3 ubiquitin-protein ligase UBR4 OS=Homo sapiens OX=9606 GN=UBR4 PE=1 SV=1	1799	30	6.21915	6.79071	6.39425	6.42046	0.126845	-0.0867884	0.0400566	0.00590189	0.0459585
	sp|Q58WW2-3|DCAF6_HUMAN	DCAF6	Isoform 3 of DDB1- and CUL4-associated factor 6 OS=Homo sapiens OX=9606 GN=DCAF6	2279	2	7.17408	7.83123	6.71415	7.3496	0.126444	-0.222034	-0.0955894	0.130462	0.0348729
	sp|Q13555-6|KCC2G_HUMAN	CAMK2G	Isoform 6 of Calcium/calmodulin-dependent protein kinase type II subunit gamma OS=Homo sapiens OX=9606 GN=CAMK2G	1322	6	5.13054	5.60049	6.3047	5.20492	0.126442	0.170876	0.297318	-0.276551	0.0207667
	sp|Q7L2E3-2|DHX30_HUMAN	DHX30	Isoform 2 of ATP-dependent RNA helicase DHX30 OS=Homo sapiens OX=9606 GN=DHX30	1626	19	6.78803	7.40873	6.88332	6.1506	0.126233	-0.106123	0.0201102	-0.162377	-0.142266
	sp|Q5VYX0|RNLS_HUMAN	RNLS	Renalase OS=Homo sapiens OX=9606 GN=RNLS PE=1 SV=1	5498	4	5.10581	5.57179	7.74096	7.50093	0.126003	0.47437	0.600373	-0.0454427	0.554931
	sp|P51452|DUS3_HUMAN	DUSP3	Dual specificity protein phosphatase 3 OS=Homo sapiens OX=9606 GN=DUSP3 PE=1 SV=1	100	7	4.96254	5.41539	5.12224	4.70174	0.125987	-0.0802917	0.0456957	-0.123578	-0.0778824
	sp|P55209|NP1L1_HUMAN	NAP1L1	Nucleosome assembly protein 1-like 1 OS=Homo sapiens OX=9606 GN=NAP1L1 PE=1 SV=1	66	12	4.67445	5.10066	4.65805	4.92341	0.125889	-0.130959	-0.00506999	0.0799323	0.0748623
	sp|Q9NZN5|ARHGC_HUMAN	ARHGEF12	Rho guanine nucleotide exchange factor 12 OS=Homo sapiens OX=9606 GN=ARHGEF12 PE=1 SV=1	1498	10	6.70706	7.3172	6.76651	7.17103	0.12561	-0.11288	0.0127307	0.0837684	0.0964991
	sp|P02794|FRIH_HUMAN	FTH1	Ferritin heavy chain OS=Homo sapiens OX=9606 GN=FTH1 PE=1 SV=2	4874	14	5.55652	6.06192	6.72876	6.52788	0.125594	0.150565	0.276159	-0.0437247	0.232434
	sp|P62263|RS14_HUMAN	RPS14	40S ribosomal protein S14 OS=Homo sapiens OX=9606 GN=RPS14 PE=1 SV=3	790	5	7.28436	7.94646	6.72535	6.97772	0.125511	-0.240704	-0.115194	0.0531471	-0.0620465
	sp|P36955|PEDF_HUMAN	SERPINF1	Pigment epithelium-derived factor OS=Homo sapiens OX=9606 GN=SERPINF1 PE=1 SV=4	6165	2	7.28539	7.94741	5.95198	9.29483	0.125479	-0.417114	-0.291635	0.643058	0.351424
	sp|Q13625-3|ASPP2_HUMAN	TP53BP2	Isoform 3 of Apoptosis-stimulating of p53 protein 2 OS=Homo sapiens OX=9606 GN=TP53BP2	3942	3	5.81275	6.33944	6.73491	6.40167	0.125135	0.0873044	0.212439	-0.0732107	0.139228
	sp|Q9NYK5|RM39_HUMAN	MRPL39	39S ribosomal protein L39, mitochondrial OS=Homo sapiens OX=9606 GN=MRPL39 PE=1 SV=3	1524	11	5.13943	5.60422	7.40062	4.74609	0.124907	0.401131	0.526038	-0.640906	-0.114868
	sp|Q9P2X0-2|DPM3_HUMAN	DPM3	Isoform 2 of Dolichol-phosphate mannosyltransferase subunit 3 OS=Homo sapiens OX=9606 GN=DPM3	4917	2	6.99858	7.63036	7.14288	6.62796	0.124688	-0.0952449	0.0294433	-0.107941	-0.0784973
	sp|P61026|RAB10_HUMAN	RAB10	Ras-related protein Rab-10 OS=Homo sapiens OX=9606 GN=RAB10 PE=1 SV=1	4214	6	6.85026	7.46834	6.66816	6.59701	0.124629	-0.1635	-0.0388711	-0.015475	-0.0543461
	sp|Q9Y2Q3-2|GSTK1_HUMAN	GSTK1	Isoform 2 of Glutathione S-transferase kappa 1 OS=Homo sapiens OX=9606 GN=GSTK1	1432	7	6.00738	6.54892	6.15096	5.37019	0.124523	-0.0904465	0.0340761	-0.195839	-0.161763
	sp|Q96EL2|RT24_HUMAN	MRPS24	28S ribosomal protein S24, mitochondrial OS=Homo sapiens OX=9606 GN=MRPS24 PE=1 SV=1	5563	4	5.88894	6.41927	7.44664	5.67028	0.124402	0.214181	0.338583	-0.393171	-0.054588
	sp|O94856-9|NFASC_HUMAN	NFASC	Isoform 9 of Neurofascin OS=Homo sapiens OX=9606 GN=NFASC	3979	2	5.98828	6.52722	8.11986	6.86717	0.124326	0.314986	0.439312	-0.241739	0.197573
	sp|P42704|LPPRC_HUMAN	LRPPRC	Leucine-rich PPR motif-containing protein, mitochondrial OS=Homo sapiens OX=9606 GN=LRPPRC PE=1 SV=3	1333	31	5.67522	6.18492	6.17731	4.96044	0.124077	-0.00177542	0.122302	-0.316512	-0.194211
	sp|P62280|RS11_HUMAN	RPS11	40S ribosomal protein S11 OS=Homo sapiens OX=9606 GN=RPS11 PE=1 SV=3	3355	7	5.78776	6.30738	5.37147	5.64773	0.124037	-0.231726	-0.107688	0.0723551	-0.0353331
	sp|Q63ZY3-2|KANK2_HUMAN	KANK2	Isoform 2 of KN motif and ankyrin repeat domain-containing protein 2 OS=Homo sapiens OX=9606 GN=KANK2	456	16	6.805	7.41589	6.74801	6.99167	0.124024	-0.136159	-0.0121348	0.0511761	0.0390412
	sp|P36405|ARL3_HUMAN	ARL3	ADP-ribosylation factor-like protein 3 OS=Homo sapiens OX=9606 GN=ARL3 PE=1 SV=2	5268	6	6.6853	7.2846	7.01776	7.99188	0.123859	-0.0538408	0.070018	0.187526	0.257544
	sp|Q9Y2R0|COA3_HUMAN	COA3	Cytochrome c oxidase assembly factor 3 homolog, mitochondrial OS=Homo sapiens OX=9606 GN=COA3 PE=1 SV=1	5350	3	6.87637	7.49251	6.67647	7.23965	0.123802	-0.166363	-0.0425613	0.116833	0.0742721
	sp|P61254|RL26_HUMAN	RPL26	60S ribosomal protein L26 OS=Homo sapiens OX=9606 GN=RPL26 PE=1 SV=1	3615	4	7.27856	7.92941	6.62939	6.63296	0.12356	-0.258337	-0.134776	0.000775973	-0.134
	sp|P39019|RS19_HUMAN	RPS19	40S ribosomal protein S19 OS=Homo sapiens OX=9606 GN=RPS19 PE=1 SV=2	1759	8	4.84863	5.28202	4.88546	4.96371	0.123513	-0.112595	0.0109173	0.022924	0.0338412
	sp|O95684|FR1OP_HUMAN	FGFR1OP	FGFR1 oncogene partner OS=Homo sapiens OX=9606 GN=FGFR1OP PE=1 SV=1	519	2	4.02727	4.38702	3.66954	3.90497	0.123441	-0.257643	-0.134201	0.0897116	-0.0444895
	sp|Q7RTP6|MICA3_HUMAN	MICAL3	[F-actin]-monooxygenase MICAL3 OS=Homo sapiens OX=9606 GN=MICAL3 PE=1 SV=2	2678	10	6.35954	6.92625	6.40939	6.65393	0.123153	-0.111887	0.0112654	0.0540178	0.0652832
	sp|O60841|IF2P_HUMAN	EIF5B	Eukaryotic translation initiation factor 5B OS=Homo sapiens OX=9606 GN=EIF5B PE=1 SV=4	1036	24	5.95572	6.48637	5.63832	6.09457	0.123136	-0.202146	-0.0790097	0.112257	0.0332473
	sp|Q9H008|LHPP_HUMAN	LHPP	Phospholysine phosphohistidine inorganic pyrophosphate phosphatase OS=Homo sapiens OX=9606 GN=LHPP PE=1 SV=2	1012	4	5.65002	6.15231	6.75289	4.8127	0.122872	0.134378	0.257251	-0.488659	-0.231409
	tr|J3QTA6|J3QTA6_HUMAN	CHCHD6	MICOS complex subunit OS=Homo sapiens OX=9606 GN=CHCHD6 PE=1 SV=1	2644	3	5.47893	5.96514	8.24684	8.09337	0.122662	0.467286	0.589948	-0.0271009	0.562847
	sp|P14618-2|KPYM_HUMAN	PKM	Isoform M1 of Pyruvate kinase PKM OS=Homo sapiens OX=9606 GN=PKM	947	30	5.97439	6.50429	7.43474	6.13823	0.122599	0.192892	0.315492	-0.276462	0.0390301
	sp|Q9Y5X3|SNX5_HUMAN	SNX5	Sorting nexin-5 OS=Homo sapiens OX=9606 GN=SNX5 PE=1 SV=1	1934	10	5.79396	6.30763	6.63976	6.50581	0.122548	0.074033	0.196581	-0.0294042	0.167177
	tr|J3KQ48|J3KQ48_HUMAN	PTRH2	Peptidyl-tRNA hydrolase 2, mitochondrial OS=Homo sapiens OX=9606 GN=PTRH2 PE=1 SV=1	2335	9	5.48688	5.97238	5.61127	4.92549	0.122318	-0.0899787	0.0323396	-0.188061	-0.155721
	sp|P06213|INSR_HUMAN	INSR	Insulin receptor OS=Homo sapiens OX=9606 GN=INSR PE=1 SV=4	1028	4	6.23616	6.78691	6.15984	6.96285	0.122097	-0.139862	-0.0177647	0.176785	0.15902
	sp|P07814|SYEP_HUMAN	EPRS	Bifunctional glutamate/proline--tRNA ligase OS=Homo sapiens OX=9606 GN=EPRS PE=1 SV=5	3658	22	6.55213	7.12936	6.42908	6.8702	0.12181	-0.149161	-0.0273509	0.0957398	0.0683889
	tr|B7WPE2|B7WPE2_HUMAN	EML3	Echinoderm microtubule associated protein like 3, isoform CRA_e OS=Homo sapiens OX=9606 GN=EML3 PE=1 SV=1	1703	12	6.38634	6.94872	7.52451	6.04247	0.121759	0.114849	0.236609	-0.316459	-0.0798502
	sp|Q99614|TTC1_HUMAN	TTC1	Tetratricopeptide repeat protein 1 OS=Homo sapiens OX=9606 GN=TTC1 PE=1 SV=1	1867	10	6.24156	6.79108	6.3205	5.70092	0.121736	-0.103603	0.0181324	-0.148842	-0.13071
	sp|Q13085-4|ACACA_HUMAN	ACACA	Isoform 4 of Acetyl-CoA carboxylase 1 OS=Homo sapiens OX=9606 GN=ACACA	1631	22	6.12532	6.66413	6.46408	5.0618	0.121632	-0.0439715	0.0776606	-0.352794	-0.275133
	sp|P46783|RS10_HUMAN	RPS10	40S ribosomal protein S10 OS=Homo sapiens OX=9606 GN=RPS10 PE=1 SV=1	130	8	4.61291	5.01823	4.58068	4.44685	0.121502	-0.131616	-0.0101143	-0.042778	-0.0528924
	sp|P40926|MDHM_HUMAN	MDH2	Malate dehydrogenase, mitochondrial OS=Homo sapiens OX=9606 GN=MDH2 PE=1 SV=3	1301	25	4.84891	5.27449	5.21303	5.11848	0.121371	-0.0169117	0.104459	-0.0264039	0.0780554
	sp|P49748-3|ACADV_HUMAN	ACADVL	Isoform 3 of Very long-chain specific acyl-CoA dehydrogenase, mitochondrial OS=Homo sapiens OX=9606 GN=ACADVL	1412	25	6.3169	6.871	6.57308	6.65804	0.121303	-0.0639509	0.0573525	0.0185302	0.0758826
	tr|X6RAY8|X6RAY8_HUMAN	MRPL4	39S ribosomal protein L4, mitochondrial OS=Homo sapiens OX=9606 GN=MRPL4 PE=1 SV=1	2746	2	5.81265	6.32226	8.17011	5.61351	0.121244	0.369916	0.491161	-0.541451	-0.0502908
	sp|O14602|IF1AY_HUMAN	EIF1AY	Eukaryotic translation initiation factor 1A, Y-chromosomal OS=Homo sapiens OX=9606 GN=EIF1AY PE=1 SV=4	3076	4	6.87931	7.48189	6.95158	7.60346	0.12114	-0.106061	0.0150784	0.129314	0.144393
	sp|Q7Z4F1|LRP10_HUMAN	LRP10	Low-density lipoprotein receptor-related protein 10 OS=Homo sapiens OX=9606 GN=LRP10 PE=1 SV=2	3350	3	7.1925	7.82217	7.06148	6.29355	0.121075	-0.147598	-0.0265227	-0.166097	-0.192619
	sp|P36578|RL4_HUMAN	RPL4	60S ribosomal protein L4 OS=Homo sapiens OX=9606 GN=RPL4 PE=1 SV=5	3	16	6.87301	7.47443	6.58726	6.27243	0.121023	-0.182286	-0.0612629	-0.0706552	-0.131918
	sp|Q86YS6|RAB43_HUMAN	RAB43	Ras-related protein Rab-43 OS=Homo sapiens OX=9606 GN=RAB43 PE=1 SV=1	4214	3	3.98584	4.33395	3.70611	3.55065	0.120801	-0.225777	-0.104976	-0.0618232	-0.166799
	sp|P40227|TCPZ_HUMAN	CCT6A	T-complex protein 1 subunit zeta OS=Homo sapiens OX=9606 GN=CCT6A PE=1 SV=3	1433	19	3.00949	3.2718	3.16171	3.19628	0.120565	-0.0493817	0.0711837	0.0156895	0.0868732
	sp|Q5VYS8|TUT7_HUMAN	TUT7	Terminal uridylyltransferase 7 OS=Homo sapiens OX=9606 GN=TUT7 PE=1 SV=1	2012	10	4.65324	5.05822	4.30748	4.82618	0.120393	-0.231785	-0.111391	0.164035	0.0526436
	sp|Q92552-2|RT27_HUMAN	MRPS27	Isoform 2 of 28S ribosomal protein S27, mitochondrial OS=Homo sapiens OX=9606 GN=MRPS27	2089	10	5.00199	5.43711	5.34972	4.80193	0.120337	-0.0233757	0.0969611	-0.15585	-0.0588888
	sp|O75323|NIPS2_HUMAN	NIPSNAP2	Protein NipSnap homolog 2 OS=Homo sapiens OX=9606 GN=NIPSNAP2 PE=1 SV=1	3533	8	5.7696	6.27105	6.81962	5.97293	0.120234	0.120986	0.24122	-0.191252	0.0499679
	sp|Q7Z333-4|SETX_HUMAN	SETX	Isoform 4 of Probable helicase senataxin OS=Homo sapiens OX=9606 GN=SETX	2241	7	6.93977	7.54202	6.93722	7.46566	0.120063	-0.120593	-0.000529866	0.105913	0.105384
	sp|Q9H0R6|GATA_HUMAN	QRSL1	Glutamyl-tRNA(Gln) amidotransferase subunit A, mitochondrial OS=Homo sapiens OX=9606 GN=QRSL1 PE=1 SV=2	109	12	5.60193	6.08793	6.11131	5.53979	0.120027	0.00552871	0.125556	-0.141648	-0.0160922
	sp|Q96BJ3|AIDA_HUMAN	AIDA	Axin interactor, dorsalization-associated protein OS=Homo sapiens OX=9606 GN=AIDA PE=1 SV=1	3190	8	6.61293	7.18459	7.17385	7.58	0.119617	-0.00215825	0.117459	0.0794505	0.196909
	sp|O14908|GIPC1_HUMAN	GIPC1	PDZ domain-containing protein GIPC1 OS=Homo sapiens OX=9606 GN=GIPC1 PE=1 SV=2	4285	4	6.85585	7.44692	6.93573	7.73866	0.119308	-0.102597	0.0167108	0.158036	0.174747
	sp|Q92609-2|TBCD5_HUMAN	TBC1D5	Isoform 2 of TBC1 domain family member 5 OS=Homo sapiens OX=9606 GN=TBC1D5	4234	16	6.64227	7.21448	7.32782	6.561	0.119219	0.0224883	0.141707	-0.159468	-0.0177603
	sp|P13807|GYS1_HUMAN	GYS1	Glycogen [starch] synthase, muscle OS=Homo sapiens OX=9606 GN=GYS1 PE=1 SV=2	1222	16	5.79408	6.29309	8.06732	5.43912	0.119188	0.358321	0.477509	-0.568714	-0.091205
	sp|Q9UI30|TR112_HUMAN	TRMT112	Multifunctional methyltransferase subunit TRM112-like protein OS=Homo sapiens OX=9606 GN=TRMT112 PE=1 SV=1	5667	3	6.84515	7.43459	7.21445	6.93702	0.11917	-0.0433634	0.0758069	-0.0565747	0.0192321
	sp|Q9NSE4|SYIM_HUMAN	IARS2	Isoleucine--tRNA ligase, mitochondrial OS=Homo sapiens OX=9606 GN=IARS2 PE=1 SV=2	2662	26	5.96624	6.4778	6.52108	6.48755	0.118681	0.00960737	0.128289	-0.00743791	0.120851
	sp|Q96F24|NRBF2_HUMAN	NRBF2	Nuclear receptor-binding factor 2 OS=Homo sapiens OX=9606 GN=NRBF2 PE=1 SV=1	2542	2	6.82488	7.40964	6.8189	8.19153	0.1186	-0.119866	-0.00126536	0.264595	0.263329
	sp|Q13642-4|FHL1_HUMAN	FHL1	Isoform 4 of Four and a half LIM domains protein 1 OS=Homo sapiens OX=9606 GN=FHL1	1714	11	5.41717	5.88105	8.4389	6.27448	0.118535	0.52098	0.639515	-0.427558	0.211957
	sp|Q15814|TBCC_HUMAN	TBCC	Tubulin-specific chaperone C OS=Homo sapiens OX=9606 GN=TBCC PE=1 SV=2	512	3	5.36787	5.82703	5.85036	5.69916	0.118412	0.00576343	0.124175	-0.0377757	0.0863996
	sp|Q9UKX7|NUP50_HUMAN	NUP50	Nuclear pore complex protein Nup50 OS=Homo sapiens OX=9606 GN=NUP50 PE=1 SV=2	641	6	6.25304	6.78785	5.38006	4.5277	0.118398	-0.335332	-0.216933	-0.248844	-0.465777
	sp|Q12797|ASPH_HUMAN	ASPH	Aspartyl/asparaginyl beta-hydroxylase OS=Homo sapiens OX=9606 GN=ASPH PE=1 SV=3	987	25	6.27725	6.81322	6.11204	7.69146	0.118204	-0.156684	-0.0384794	0.331603	0.293124
	sp|P21359|NF1_HUMAN	NF1	Neurofibromin OS=Homo sapiens OX=9606 GN=NF1 PE=1 SV=2	1874	14	6.97927	7.57437	6.93829	6.21276	0.118049	-0.126546	-0.00849738	-0.159344	-0.167841
	sp|Q9BQ67|GRWD1_HUMAN	GRWD1	Glutamate-rich WD repeat-containing protein 1 OS=Homo sapiens OX=9606 GN=GRWD1 PE=1 SV=1	2553	2	6.43975	6.9887	5.80244	5.43981	0.118019	-0.268364	-0.150344	-0.0931034	-0.243448
	sp|O00763|ACACB_HUMAN	ACACB	Acetyl-CoA carboxylase 2 OS=Homo sapiens OX=9606 GN=ACACB PE=1 SV=3	1631	7	6.39749	6.94279	6.78862	5.17482	0.118008	-0.0323965	0.0856116	-0.39161	-0.305998
	tr|Q53FA3|Q53FA3_HUMAN	HSPA1L	HSPA1L (Fragment) OS=Homo sapiens OX=9606 GN=HSPA1L PE=1 SV=1	35	3	6.92908	7.51951	6.94224	7.50037	0.117974	-0.115237	0.00273708	0.111561	0.114298
	tr|A0A1C7CYX1|A0A1C7CYX1_HUMAN	ELMSAN1	ELM2 and SANT domain-containing protein 1 OS=Homo sapiens OX=9606 GN=ELMSAN1 PE=1 SV=1	761	9	5.91784	6.42202	5.80857	7.0458	0.117956	-0.144844	-0.0268881	0.278579	0.251691
	sp|P10515|ODP2_HUMAN	DLAT	Dihydrolipoyllysine-residue acetyltransferase component of pyruvate dehydrogenase complex, mitochondrial OS=Homo sapiens OX=9606 GN=DLAT PE=1 SV=3	2576	12	6.84901	7.43213	7.36082	6.49583	0.11788	-0.0139083	0.103971	-0.180353	-0.0763816
	tr|A0A0G2JSA7|A0A0G2JSA7_HUMAN	TUBGCP5	Gamma-tubulin complex component OS=Homo sapiens OX=9606 GN=TUBGCP5 PE=1 SV=1	2622	2	6.42936	6.97645	7.39428	7.70846	0.117817	0.0839179	0.201735	0.0600323	0.261768
	sp|P07203|GPX1_HUMAN	GPX1	Glutathione peroxidase 1 OS=Homo sapiens OX=9606 GN=GPX1 PE=1 SV=4	3187	13	5.55084	6.0225	6.40763	6.68715	0.117657	0.0894283	0.207085	0.0615988	0.268684
	sp|P82675|RT05_HUMAN	MRPS5	28S ribosomal protein S5, mitochondrial OS=Homo sapiens OX=9606 GN=MRPS5 PE=1 SV=2	4141	8	6.30297	6.83783	7.52522	5.98339	0.117507	0.138194	0.255701	-0.330769	-0.0750683
	sp|Q9Y613|FHOD1_HUMAN	FHOD1	FH1/FH2 domain-containing protein 1 OS=Homo sapiens OX=9606 GN=FHOD1 PE=1 SV=3	2960	7	6.95071	7.54023	6.9133	7.52368	0.117447	-0.125233	-0.00778617	0.122064	0.114277
	sp|Q7Z4W1|DCXR_HUMAN	DCXR	L-xylulose reductase OS=Homo sapiens OX=9606 GN=DCXR PE=1 SV=2	2925	5	6.90738	7.49315	7.14935	6.95117	0.117434	-0.0677603	0.0496735	-0.0405556	0.00911793
	sp|O95782|AP2A1_HUMAN	AP2A1	AP-2 complex subunit alpha-1 OS=Homo sapiens OX=9606 GN=AP2A1 PE=1 SV=3	112	21	6.72316	7.29325	6.99507	7.20477	0.117423	-0.0602237	0.0571994	0.0426132	0.0998126
	sp|Q8IY63|AMOL1_HUMAN	AMOTL1	Angiomotin-like protein 1 OS=Homo sapiens OX=9606 GN=AMOTL1 PE=1 SV=1	5201	5	6.61004	7.17041	6.60044	6.91738	0.117397	-0.119495	-0.00209753	0.0676653	0.0655678
	sp|P62851|RS25_HUMAN	RPS25	40S ribosomal protein S25 OS=Homo sapiens OX=9606 GN=RPS25 PE=1 SV=1	3945	5	7.321	7.94105	6.74679	6.86654	0.117288	-0.235127	-0.117839	0.0253813	-0.0924574
	sp|Q9H6P5|TASP1_HUMAN	TASP1	Threonine aspartase 1 OS=Homo sapiens OX=9606 GN=TASP1 PE=1 SV=1	6384	2	6.67457	7.23938	7.61444	6.28575	0.117191	0.0728718	0.190063	-0.276652	-0.0865889
	tr|A0A096LP25|A0A096LP25_HUMAN	AAK1	AP2-associated protein kinase 1 (Fragment) OS=Homo sapiens OX=9606 GN=AAK1 PE=1 SV=1	4507	6	4.06405	4.4068	4.09812	3.97738	0.116813	-0.104767	0.0120464	-0.043145	-0.0310986
	sp|O60658|PDE8A_HUMAN	PDE8A	High affinity cAMP-specific and IBMX-insensitive 3',5'-cyclic phosphodiesterase 8A OS=Homo sapiens OX=9606 GN=PDE8A PE=1 SV=2	4875	4	5.90225	6.3998	6.3862	8.0934	0.11676	-0.00306758	0.113693	0.341787	0.45548
	sp|P26038|MOES_HUMAN	MSN	Moesin OS=Homo sapiens OX=9606 GN=MSN PE=1 SV=3	283	19	6.32742	6.86031	7.34279	6.6128	0.116657	0.0980549	0.214712	-0.151069	0.0636428
	sp|P08195-4|4F2_HUMAN	SLC3A2	Isoform 4 of 4F2 cell-surface antigen heavy chain OS=Homo sapiens OX=9606 GN=SLC3A2	749	10	7.03758	7.63006	5.01948	8.90231	0.116616	-0.604156	-0.48754	0.826641	0.339101
	sp|Q8NBL1|PGLT1_HUMAN	POGLUT1	Protein O-glucosyltransferase 1 OS=Homo sapiens OX=9606 GN=POGLUT1 PE=1 SV=1	2258	7	5.92821	6.42648	6.49115	5.10893	0.116433	0.0144453	0.130878	-0.345455	-0.214577
	tr|A0A0B4J1V8|A0A0B4J1V8_HUMAN	PPAN-P2RY11	HCG2039996 OS=Homo sapiens OX=9606 GN=PPAN-P2RY11 PE=3 SV=1	6423	3	5.78857	6.27425	5.00194	5.14018	0.116236	-0.326956	-0.21072	0.0393307	-0.17139
	sp|Q6P1N9|TATD1_HUMAN	TATDN1	Putative deoxyribonuclease TATDN1 OS=Homo sapiens OX=9606 GN=TATDN1 PE=1 SV=2	3669	5	5.30683	5.75058	6.104	5.96458	0.115857	0.0860495	0.201907	-0.0333344	0.168572
	sp|Q8IZ83|A16A1_HUMAN	ALDH16A1	Aldehyde dehydrogenase family 16 member A1 OS=Homo sapiens OX=9606 GN=ALDH16A1 PE=1 SV=2	126	8	6.60603	7.15786	7.1586	7.87836	0.115743	0.000150486	0.115894	0.138217	0.254111
	sp|Q9Y276|BCS1_HUMAN	BCS1L	Mitochondrial chaperone BCS1 OS=Homo sapiens OX=9606 GN=BCS1L PE=1 SV=1	2789	8	6.96617	7.54782	7.8917	4.55394	0.115694	0.064277	0.179971	-0.79322	-0.613249
	tr|A0A1B0GUZ7|A0A1B0GUZ7_HUMAN	EFR3A	Protein EFR3 homolog A OS=Homo sapiens OX=9606 GN=EFR3A PE=1 SV=1	1598	12	6.19793	6.71474	6.43833	7.85759	0.115544	-0.0606436	0.0549008	0.2874	0.3423
	sp|Q13505|MTX1_HUMAN	MTX1	Metaxin-1 OS=Homo sapiens OX=9606 GN=MTX1 PE=1 SV=3	4525	7	4.71533	5.10791	5.25083	4.98979	0.115376	0.0398128	0.155189	-0.0735663	0.0816228
	sp|Q8ND04-2|SMG8_HUMAN	SMG8	Isoform 2 of Protein SMG8 OS=Homo sapiens OX=9606 GN=SMG8	2085	9	5.52298	5.98193	5.61885	5.42573	0.115164	-0.0903358	0.0248284	-0.0504572	-0.0256288
	sp|Q86VW0|SESD1_HUMAN	SESTD1	SEC14 domain and spectrin repeat-containing protein 1 OS=Homo sapiens OX=9606 GN=SESTD1 PE=1 SV=2	4371	6	4.89247	5.29836	6.07935	7.50461	0.114982	0.198373	0.313355	0.30386	0.617215
	sp|Q9HAB8|PPCS_HUMAN	PPCS	Phosphopantothenate--cysteine ligase OS=Homo sapiens OX=9606 GN=PPCS PE=1 SV=2	1857	9	6.15644	6.6667	6.57584	6.44834	0.114877	-0.0197987	0.0950785	-0.0282463	0.0668323
	sp|Q96BW5|PTER_HUMAN	PTER	Phosphotriesterase-related protein OS=Homo sapiens OX=9606 GN=PTER PE=1 SV=1	2271	7	6.11296	6.61932	5.71394	7.2048	0.114813	-0.212196	-0.0973836	0.334472	0.237088
	sp|Q16539|MK14_HUMAN	MAPK14	Mitogen-activated protein kinase 14 OS=Homo sapiens OX=9606 GN=MAPK14 PE=1 SV=3	358	8	5.76435	6.24088	6.23661	5.88061	0.114592	-0.000988199	0.113603	-0.0847942	0.0288091
	sp|O60449-2|LY75_HUMAN	LY75	Isoform 2 of Lymphocyte antigen 75 OS=Homo sapiens OX=9606 GN=LY75	5724	3	6.29933	6.81948	7.45307	5.74801	0.114464	0.128173	0.242637	-0.374773	-0.132136
	sp|O75794|CD123_HUMAN	CDC123	Cell division cycle protein 123 homolog OS=Homo sapiens OX=9606 GN=CDC123 PE=1 SV=1	3276	3	6.06482	6.56527	6.11409	6.61031	0.11439	-0.102716	0.0116741	0.112579	0.124253
	sp|P29084|T2EB_HUMAN	GTF2E2	Transcription initiation factor IIE subunit beta OS=Homo sapiens OX=9606 GN=GTF2E2 PE=1 SV=1	2113	5	7.1803	7.77277	6.96295	6.68154	0.114386	-0.158731	-0.0443451	-0.0595177	-0.103863
	sp|Q08AD1|CAMP2_HUMAN	CAMSAP2	Calmodulin-regulated spectrin-associated protein 2 OS=Homo sapiens OX=9606 GN=CAMSAP2 PE=1 SV=3	1474	17	5.24336	5.67523	5.35109	5.42212	0.114187	-0.0848478	0.0293394	0.0190251	0.0483645
	sp|Q9UNA1|RHG26_HUMAN	ARHGAP26	Rho GTPase-activating protein 26 OS=Homo sapiens OX=9606 GN=ARHGAP26 PE=1 SV=1	4980	6	5.59921	6.06034	6.79255	7.22423	0.114175	0.164555	0.278731	0.0888888	0.36762
	sp|P11172|UMPS_HUMAN	UMPS	Uridine 5'-monophosphate synthase OS=Homo sapiens OX=9606 GN=UMPS PE=1 SV=1	551	13	6.33769	6.85872	6.50024	6.31555	0.113983	-0.0774474	0.0365355	-0.0415854	-0.00504986
	sp|Q8N3P4|VPS8_HUMAN	VPS8	Vacuolar protein sorting-associated protein 8 homolog OS=Homo sapiens OX=9606 GN=VPS8 PE=1 SV=3	934	11	7.14441	7.73122	7.02693	6.60576	0.113881	-0.1378	-0.023919	-0.0891696	-0.113089
	sp|Q06830|PRDX1_HUMAN	PRDX1	Peroxiredoxin-1 OS=Homo sapiens OX=9606 GN=PRDX1 PE=1 SV=1	683	18	6.26996	6.78412	6.86707	6.43998	0.113706	0.0175333	0.13124	-0.0926399	0.0385996
	sp|Q9NZB2-6|F120A_HUMAN	FAM120A	Isoform F of Constitutive coactivator of PPAR-gamma-like protein 1 OS=Homo sapiens OX=9606 GN=FAM120A	1551	18	6.44826	6.97697	6.63284	6.3358	0.11369	-0.0729746	0.0407153	-0.0660992	-0.0253839
	sp|P62330|ARF6_HUMAN	ARF6	ADP-ribosylation factor 6 OS=Homo sapiens OX=9606 GN=ARF6 PE=1 SV=2	3537	8	5.82492	6.30248	5.80123	7.4793	0.113681	-0.11956	-0.005879	0.366542	0.360663
	sp|O95433|AHSA1_HUMAN	AHSA1	Activator of 90 kDa heat shock protein ATPase homolog 1 OS=Homo sapiens OX=9606 GN=AHSA1 PE=1 SV=1	3188	9	5.64254	6.10477	5.54559	5.47957	0.113592	-0.138595	-0.0250029	-0.017277	-0.0422799
	sp|P51398|RT29_HUMAN	DAP3	28S ribosomal protein S29, mitochondrial OS=Homo sapiens OX=9606 GN=DAP3 PE=1 SV=1	3085	7	6.58888	7.12783	7.68347	5.77609	0.113429	0.108296	0.221725	-0.411664	-0.189939
	sp|Q9Y606|TRUA_HUMAN	PUS1	tRNA pseudouridine synthase A OS=Homo sapiens OX=9606 GN=PUS1 PE=1 SV=3	2374	10	6.70686	7.25493	6.54207	6.34397	0.113323	-0.149213	-0.0358906	-0.0443616	-0.0802523
	sp|O95793|STAU1_HUMAN	STAU1	Double-stranded RNA-binding protein Staufen homolog 1 OS=Homo sapiens OX=9606 GN=STAU1 PE=1 SV=2	394	8	6.35718	6.87655	6.7022	6.53537	0.113297	-0.0370499	0.0762467	-0.0363655	0.0398812
	sp|Q8IZ52|CHSS2_HUMAN	CHPF	Chondroitin sulfate synthase 2 OS=Homo sapiens OX=9606 GN=CHPF PE=1 SV=2	2875	6	5.57319	6.02783	7.3679	5.72866	0.113136	0.289614	0.402751	-0.363055	0.0396952
	sp|P61244|MAX_HUMAN	MAX	Protein max OS=Homo sapiens OX=9606 GN=MAX PE=1 SV=1	4267	4	6.8248	7.38098	7.14419	7.25877	0.113027	-0.0470433	0.0659837	0.0229553	0.088939
	sp|Q13601|KRR1_HUMAN	KRR1	KRR1 small subunit processome component homolog OS=Homo sapiens OX=9606 GN=KRR1 PE=1 SV=4	4534	5	7.77788	8.4104	6.0332	6.7978	0.112799	-0.479253	-0.366454	0.172146	-0.194308
	sp|Q15813-2|TBCE_HUMAN	TBCE	Isoform 2 of Tubulin-specific chaperone E OS=Homo sapiens OX=9606 GN=TBCE	4784	10	3.44678	3.72691	3.69128	3.41165	0.112731	-0.0138595	0.0988713	-0.113653	-0.0147817
	sp|Q9HC07|TM165_HUMAN	TMEM165	Transmembrane protein 165 OS=Homo sapiens OX=9606 GN=TMEM165 PE=1 SV=1	5014	5	7.21357	7.79701	6.76694	6.08099	0.112207	-0.204418	-0.0922112	-0.154195	-0.246407
	sp|Q86V88|MGDP1_HUMAN	MDP1	Magnesium-dependent phosphatase 1 OS=Homo sapiens OX=9606 GN=MDP1 PE=1 SV=1	4729	3	5.84013	6.31211	6.93118	6.46867	0.112123	0.134978	0.247101	-0.0996304	0.147471
	sp|Q96BH1|RNF25_HUMAN	RNF25	E3 ubiquitin-protein ligase RNF25 OS=Homo sapiens OX=9606 GN=RNF25 PE=1 SV=1	4298	3	6.53893	7.06575	6.96066	6.4711	0.111788	-0.0216183	0.0901699	-0.105212	-0.0150418
	sp|O14684|PTGES_HUMAN	PTGES	Prostaglandin E synthase OS=Homo sapiens OX=9606 GN=PTGES PE=1 SV=2	1127	2	5.74436	6.20706	5.16468	4.34867	0.111765	-0.265231	-0.153466	-0.248108	-0.401574
	sp|P35869|AHR_HUMAN	AHR	Aryl hydrocarbon receptor OS=Homo sapiens OX=9606 GN=AHR PE=1 SV=2	6536	2	7.82709	8.45745	6.63664	5.66324	0.111747	-0.349769	-0.238022	-0.228825	-0.466847
	sp|P27361|MK03_HUMAN	MAPK3	Mitogen-activated protein kinase 3 OS=Homo sapiens OX=9606 GN=MAPK3 PE=1 SV=4	2265	13	6.14423	6.63886	6.63509	6.93052	0.111703	-0.000819856	0.110883	0.0628479	0.173731
	sp|P46778|RL21_HUMAN	RPL21	60S ribosomal protein L21 OS=Homo sapiens OX=9606 GN=RPL21 PE=1 SV=2	4999	4	7.10275	7.67332	6.80505	6.91501	0.111473	-0.173244	-0.0617712	0.0231238	-0.0386474
	sp|Q13637|RAB32_HUMAN	RAB32	Ras-related protein Rab-32 OS=Homo sapiens OX=9606 GN=RAB32 PE=1 SV=3	2770	5	6.91763	7.47291	6.7681	8.10987	0.111393	-0.142919	-0.0315259	0.260927	0.229401
	sp|P17405|ASM_HUMAN	SMPD1	Sphingomyelin phosphodiesterase OS=Homo sapiens OX=9606 GN=SMPD1 PE=1 SV=5	2135	6	5.61716	6.06745	6.46679	8.08492	0.111249	0.0919594	0.203209	0.322183	0.525392
	sp|P78346-2|RPP30_HUMAN	RPP30	Isoform 2 of Ribonuclease P protein subunit p30 OS=Homo sapiens OX=9606 GN=RPP30	5672	4	6.44787	6.96462	6.97945	6.20839	0.111223	0.00306768	0.114291	-0.168893	-0.0546016
	sp|Q96CN4-2|EVI5L_HUMAN	EVI5L	Isoform 2 of EVI5-like protein OS=Homo sapiens OX=9606 GN=EVI5L	4185	3	6.74348	7.28325	7.20982	7.33043	0.11109	-0.0146185	0.0964713	0.0239349	0.120406
	sp|Q9UEW8|STK39_HUMAN	STK39	STE20/SPS1-related proline-alanine-rich protein kinase OS=Homo sapiens OX=9606 GN=STK39 PE=1 SV=3	199	6	6.94234	7.49732	6.90659	6.66265	0.110954	-0.118402	-0.0074474	-0.0518767	-0.0593241
	tr|K7ELC2|K7ELC2_HUMAN	RPS15	40S ribosomal protein S15 OS=Homo sapiens OX=9606 GN=RPS15 PE=1 SV=1	4091	2	5.62198	6.07139	5.48475	5.45464	0.110948	-0.146601	-0.0356524	-0.00794276	-0.0435952
	sp|Q6GQQ9|OTU7B_HUMAN	OTUD7B	OTU domain-containing protein 7B OS=Homo sapiens OX=9606 GN=OTUD7B PE=1 SV=1	2164	3	6.66967	7.20211	7.25104	7.43924	0.110804	0.0097683	0.120573	0.036967	0.15754
	sp|Q14678|KANK1_HUMAN	KANK1	KN motif and ankyrin repeat domain-containing protein 1 OS=Homo sapiens OX=9606 GN=KANK1 PE=1 SV=3	456	5	7.42712	8.01977	6.30287	7.66832	0.110758	-0.347553	-0.236795	0.282903	0.0461086
	sp|P30086|PEBP1_HUMAN	PEBP1	Phosphatidylethanolamine-binding protein 1 OS=Homo sapiens OX=9606 GN=PEBP1 PE=1 SV=3	2437	16	5.99358	6.47073	7.12481	6.34254	0.110511	0.138922	0.249433	-0.16779	0.0816427
	tr|F5H1U9|F5H1U9_HUMAN	MPDZ	Multiple PDZ domain protein OS=Homo sapiens OX=9606 GN=MPDZ PE=1 SV=1	2766	7	6.37676	6.88229	7.12527	6.93302	0.110065	0.050056	0.160121	-0.0394608	0.12066
	sp|Q9NX55|HYPK_HUMAN	HYPK	Huntingtin-interacting protein K OS=Homo sapiens OX=9606 GN=HYPK PE=1 SV=2	4761	3	6.64373	7.17012	6.25774	6.57067	0.110003	-0.196354	-0.086351	0.070398	-0.015953
	sp|Q96G46|DUS3L_HUMAN	DUS3L	tRNA-dihydrouridine(47) synthase [NAD(P)(+)]-like OS=Homo sapiens OX=9606 GN=DUS3L PE=1 SV=2	5031	4	7.4553	8.04551	7.58032	4.00784	0.109916	-0.0859252	0.0239911	-0.919435	-0.895444
	sp|Q9Y3U8|RL36_HUMAN	RPL36	60S ribosomal protein L36 OS=Homo sapiens OX=9606 GN=RPL36 PE=1 SV=3	4634	4	7.05291	7.61037	6.57062	6.80611	0.109748	-0.211937	-0.102189	0.0507992	-0.0513899
	sp|Q15181|IPYR_HUMAN	PPA1	Inorganic pyrophosphatase OS=Homo sapiens OX=9606 GN=PPA1 PE=1 SV=2	1719	10	6.71662	7.24722	7.07089	6.14912	0.109691	-0.0355345	0.0741564	-0.201513	-0.127356
	sp|Q1ED39|KNOP1_HUMAN	KNOP1	Lysine-rich nucleolar protein 1 OS=Homo sapiens OX=9606 GN=KNOP1 PE=1 SV=1	4334	2	6.17331	6.66049	5.50599	5.68858	0.109584	-0.274627	-0.165043	0.0470683	-0.117974
	sp|Q14974|IMB1_HUMAN	KPNB1	Importin subunit beta-1 OS=Homo sapiens OX=9606 GN=KPNB1 PE=1 SV=2	513	23	6.16308	6.64808	6.00829	6.41128	0.109287	-0.145984	-0.0366967	0.0936576	0.0569609
	sp|Q99871-2|HAUS7_HUMAN	HAUS7	Isoform 2 of HAUS augmin-like complex subunit 7 OS=Homo sapiens OX=9606 GN=HAUS7	6277	2	7.04213	7.59596	7.2227	6.37477	0.10922	-0.0726934	0.0365271	-0.180165	-0.143638
	sp|Q8NBU5|ATAD1_HUMAN	ATAD1	ATPase family AAA domain-containing protein 1 OS=Homo sapiens OX=9606 GN=ATAD1 PE=1 SV=1	3510	10	6.27902	6.77277	7.42706	5.85271	0.109207	0.133045	0.242252	-0.343687	-0.101435
	sp|P83731|RL24_HUMAN	RPL24	60S ribosomal protein L24 OS=Homo sapiens OX=9606 GN=RPL24 PE=1 SV=1	1710	7	7.30733	7.8815	6.68064	6.68028	0.109125	-0.238484	-0.129359	-7.70248e-05	-0.129436
	sp|Q8IWC1|MA7D3_HUMAN	MAP7D3	MAP7 domain-containing protein 3 OS=Homo sapiens OX=9606 GN=MAP7D3 PE=1 SV=2	2709	7	7.57892	8.17418	7.43192	4.0746	0.109083	-0.13734	-0.028257	-0.867078	-0.895335
	sp|P00338-3|LDHA_HUMAN	LDHA	Isoform 3 of L-lactate dehydrogenase A chain OS=Homo sapiens OX=9606 GN=LDHA	3614	18	6.16665	6.649	7.29143	6.48512	0.10865	0.133064	0.241714	-0.16907	0.0726444
	sp|Q9NQZ7|ENTP7_HUMAN	ENTPD7	Ectonucleoside triphosphate diphosphohydrolase 7 OS=Homo sapiens OX=9606 GN=ENTPD7 PE=2 SV=1	5254	2	7.96299	8.58339	6.65851	5.20495	0.108236	-0.366348	-0.258111	-0.355316	-0.613428
	sp|P09871|C1S_HUMAN	C1S	Complement C1s subcomponent OS=Homo sapiens OX=9606 GN=C1S PE=1 SV=1	234	10	5.47761	5.90388	5.84802	5.40114	0.108117	-0.0137168	0.0944	-0.114683	-0.0202835
	sp|O43399-7|TPD54_HUMAN	TPD52L2	Isoform 7 of Tumor protein D54 OS=Homo sapiens OX=9606 GN=TPD52L2	4969	7	6.03076	6.49869	6.81325	7.49775	0.107808	0.0681942	0.176003	0.138114	0.314116
	sp|Q7Z6J8|UBE3D_HUMAN	UBE3D	E3 ubiquitin-protein ligase E3D OS=Homo sapiens OX=9606 GN=UBE3D PE=1 SV=2	5703	3	7.14843	7.703	6.999	6.72585	0.107794	-0.138271	-0.0304773	-0.0574325	-0.0879098
	sp|Q7L1T6|NB5R4_HUMAN	CYB5R4	Cytochrome b5 reductase 4 OS=Homo sapiens OX=9606 GN=CYB5R4 PE=1 SV=1	238	6	5.57684	6.00872	6.10517	5.98014	0.107608	0.0229738	0.130582	-0.0298514	0.100731
	sp|Q9NUQ7|UFSP2_HUMAN	UFSP2	Ufm1-specific protease 2 OS=Homo sapiens OX=9606 GN=UFSP2 PE=1 SV=3	3579	5	6.31583	6.80399	6.59027	6.18669	0.107409	-0.0460431	0.0613656	-0.0911714	-0.0298058
	sp|Q9NZJ7|MTCH1_HUMAN	MTCH1	Mitochondrial carrier homolog 1 OS=Homo sapiens OX=9606 GN=MTCH1 PE=1 SV=1	3337	7	6.40266	6.89753	6.81027	6.61677	0.107408	-0.0183675	0.089041	-0.0415845	0.0474565
	sp|Q8N335|GPD1L_HUMAN	GPD1L	Glycerol-3-phosphate dehydrogenase 1-like protein OS=Homo sapiens OX=9606 GN=GPD1L PE=1 SV=1	1918	4	5.71434	6.15463	6.55048	6.25728	0.107084	0.0899289	0.197013	-0.0660653	0.130948
	sp|P82663|RT25_HUMAN	MRPS25	28S ribosomal protein S25, mitochondrial OS=Homo sapiens OX=9606 GN=MRPS25 PE=1 SV=1	4521	7	5.73374	6.17508	6.58194	5.33196	0.106982	0.0920532	0.199035	-0.303846	-0.104811
	sp|P22695|QCR2_HUMAN	UQCRC2	Cytochrome b-c1 complex subunit 2, mitochondrial OS=Homo sapiens OX=9606 GN=UQCRC2 PE=1 SV=3	560	14	6.1893	6.6647	6.43236	6.09341	0.106763	-0.0511929	0.05557	-0.0780984	-0.0225284
	sp|Q5TCZ1|SPD2A_HUMAN	SH3PXD2A	SH3 and PX domain-containing protein 2A OS=Homo sapiens OX=9606 GN=SH3PXD2A PE=1 SV=1	11	15	5.71718	6.15581	5.02854	6.68932	0.106643	-0.291809	-0.185166	0.411721	0.226555
	sp|P42566|EPS15_HUMAN	EPS15	Epidermal growth factor receptor substrate 15 OS=Homo sapiens OX=9606 GN=EPS15 PE=1 SV=2	2507	17	4.87177	5.24498	5.16244	5.65763	0.106493	-0.0228837	0.0836095	0.132143	0.215753
	tr|K7ER00|K7ER00_HUMAN	FARSA	Phenylalanine--tRNA ligase alpha subunit OS=Homo sapiens OX=9606 GN=FARSA PE=1 SV=1	4133	10	2.47491	2.66449	2.30551	2.39994	0.10648	-0.208773	-0.102293	0.0579105	-0.0443827
	sp|Q9BRK3|MXRA8_HUMAN	MXRA8	Matrix remodeling-associated protein 8 OS=Homo sapiens OX=9606 GN=MXRA8 PE=1 SV=1	4357	4	6.04684	6.50994	6.89417	6.90776	0.106464	0.0827312	0.189196	0.00284178	0.192037
	sp|O95057|DIRA1_HUMAN	DIRAS1	GTP-binding protein Di-Ras1 OS=Homo sapiens OX=9606 GN=DIRAS1 PE=1 SV=1	5793	3	5.92793	6.38151	8.18442	6.98257	0.10637	0.358982	0.465352	-0.229121	0.236231
	sp|O95747|OXSR1_HUMAN	OXSR1	Serine/threonine-protein kinase OSR1 OS=Homo sapiens OX=9606 GN=OXSR1 PE=1 SV=1	199	10	6.35694	6.84232	6.32072	6.43025	0.106152	-0.114395	-0.00824356	0.024784	0.0165405
	sp|Q9UI14|PRAF1_HUMAN	RABAC1	Prenylated Rab acceptor protein 1 OS=Homo sapiens OX=9606 GN=RABAC1 PE=1 SV=1	3519	2	6.94661	7.47683	7.37363	6.24395	0.106116	-0.0200514	0.0860649	-0.239915	-0.15385
	sp|P08603|CFAH_HUMAN	CFH	Complement factor H OS=Homo sapiens OX=9606 GN=CFH PE=1 SV=4	5598	3	6.92825	7.45697	5.83734	5.34938	0.106097	-0.353278	-0.247181	-0.125939	-0.37312
	sp|Q8NHV4-3|NEDD1_HUMAN	NEDD1	Isoform 3 of Protein NEDD1 OS=Homo sapiens OX=9606 GN=NEDD1	2331	7	6.63749	7.14332	6.67904	6.86364	0.105957	-0.0969547	0.00900225	0.0393328	0.0483351
	sp|Q13155|AIMP2_HUMAN	AIMP2	Aminoacyl tRNA synthase complex-interacting multifunctional protein 2 OS=Homo sapiens OX=9606 GN=AIMP2 PE=1 SV=2	3196	9	6.58756	7.08906	6.87138	6.2643	0.105851	-0.0449948	0.060856	-0.133448	-0.072592
	sp|Q9UQN3|CHM2B_HUMAN	CHMP2B	Charged multivesicular body protein 2b OS=Homo sapiens OX=9606 GN=CHMP2B PE=1 SV=1	6470	5	6.42587	6.91139	6.87772	6.89041	0.105083	-0.00704481	0.0980385	0.00265875	0.100697
	sp|Q96BI1|S22AI_HUMAN	SLC22A18	Solute carrier family 22 member 18 OS=Homo sapiens OX=9606 GN=SLC22A18 PE=1 SV=3	2714	2	7.09158	7.62732	7.55697	5.25074	0.105069	-0.0133671	0.0917014	-0.525288	-0.433586
	sp|Q14257-2|RCN2_HUMAN	RCN2	Isoform 2 of Reticulocalbin-2 OS=Homo sapiens OX=9606 GN=RCN2	909	15	6.15901	6.62395	7.17145	6.87699	0.104994	0.114573	0.219567	-0.0604876	0.15908
	sp|P18124|RL7_HUMAN	RPL7	60S ribosomal protein L7 OS=Homo sapiens OX=9606 GN=RPL7 PE=1 SV=1	1437	9	6.64404	7.14409	6.27213	6.47697	0.10469	-0.187795	-0.083105	0.046364	-0.036741
	sp|Q16611|BAK_HUMAN	BAK1	Bcl-2 homologous antagonist/killer OS=Homo sapiens OX=9606 GN=BAK1 PE=1 SV=1	5501	6	6.53041	7.02093	6.77789	6.15137	0.104488	-0.050827	0.0536609	-0.139926	-0.0862654
	sp|Q8NB90|AFG2H_HUMAN	SPATA5	ATPase family protein 2 homolog OS=Homo sapiens OX=9606 GN=SPATA5 PE=1 SV=3	612	11	6.95103	7.47227	6.70212	6.32064	0.10432	-0.156929	-0.0526089	-0.0845477	-0.137157
	sp|Q9UHN6|CEIP2_HUMAN	CEMIP2	Cell surface hyaluronidase OS=Homo sapiens OX=9606 GN=CEMIP2 PE=1 SV=1	2751	2	8.43201	9.06339	5.76507	6.46168	0.104175	-0.652714	-0.548539	0.164572	-0.383967
	sp|Q14978-2|NOLC1_HUMAN	NOLC1	Isoform Beta of Nucleolar and coiled-body phosphoprotein 1 OS=Homo sapiens OX=9606 GN=NOLC1	547	8	5.79534	6.22926	5.34045	4.78912	0.104168	-0.2221	-0.117932	-0.157201	-0.275133
	sp|P08253|MMP2_HUMAN	MMP2	72 kDa type IV collagenase OS=Homo sapiens OX=9606 GN=MMP2 PE=1 SV=2	3225	20	5.56999	5.98701	7.0841	6.35807	0.10416	0.242748	0.346908	-0.155995	0.190913
	sp|P62081|RS7_HUMAN	RPS7	40S ribosomal protein S7 OS=Homo sapiens OX=9606 GN=RPS7 PE=1 SV=1	1651	5	4.39672	4.72463	4.0966	4.28641	0.103776	-0.205774	-0.101998	0.0653433	-0.036655
	sp|P28072|PSB6_HUMAN	PSMB6	Proteasome subunit beta type-6 OS=Homo sapiens OX=9606 GN=PSMB6 PE=1 SV=4	3828	6	6.578	7.06859	7.54816	6.88564	0.103773	0.0947022	0.198475	-0.132534	0.065941
	sp|Q9NWV8|BABA1_HUMAN	BABAM1	BRISC and BRCA1-A complex member 1 OS=Homo sapiens OX=9606 GN=BABAM1 PE=1 SV=1	2891	6	5.55228	5.96614	6.06592	5.92679	0.103718	0.023929	0.127647	-0.0334771	0.0941703
	sp|P54709|AT1B3_HUMAN	ATP1B3	Sodium/potassium-transporting ATPase subunit beta-3 OS=Homo sapiens OX=9606 GN=ATP1B3 PE=1 SV=1	4186	5	6.07935	6.53227	6.75934	6.57477	0.103667	0.0492987	0.152965	-0.0399438	0.113021
	sp|P32969|RL9_HUMAN	RPL9	60S ribosomal protein L9 OS=Homo sapiens OX=9606 GN=RPL9 PE=1 SV=1	3681	8	6.14468	6.60205	6.21384	6.27421	0.103576	-0.0874286	0.0161476	0.0139472	0.0300948
	sp|Q8IXI1|MIRO2_HUMAN	RHOT2	Mitochondrial Rho GTPase 2 OS=Homo sapiens OX=9606 GN=RHOT2 PE=1 SV=2	1773	8	6.90843	7.42264	7.1903	5.63007	0.103573	-0.0458805	0.0576927	-0.352897	-0.295204
	sp|P18084|ITB5_HUMAN	ITGB5	Integrin beta-5 OS=Homo sapiens OX=9606 GN=ITGB5 PE=1 SV=1	3242	11	5.20763	5.59504	7.93926	8.93944	0.103523	0.504855	0.608379	0.17118	0.779558
	tr|H7C2Q8|H7C2Q8_HUMAN	EBNA1BP2	EBNA1 binding protein 2, isoform CRA_d OS=Homo sapiens OX=9606 GN=EBNA1BP2 PE=1 SV=1	1544	6	6.94551	7.46165	6.27255	6.73254	0.103414	-0.250442	-0.147028	0.102097	-0.0449308
	sp|Q5VW36|FOCAD_HUMAN	FOCAD	Focadhesin OS=Homo sapiens OX=9606 GN=FOCAD PE=1 SV=1	3078	11	6.52305	7.00757	6.87405	6.57524	0.103369	-0.0277546	0.0756144	-0.0641157	0.0114987
	tr|C9JRZ6|C9JRZ6_HUMAN	CHCHD3	MICOS complex subunit OS=Homo sapiens OX=9606 GN=CHCHD3 PE=1 SV=2	49	19	5.76669	6.19406	6.11743	5.548	0.103142	-0.0179605	0.0851814	-0.140958	-0.055777
	sp|Q8TD16-2|BICD2_HUMAN	BICD2	Isoform 2 of Protein bicaudal D homolog 2 OS=Homo sapiens OX=9606 GN=BICD2	4486	4	6.97382	7.49052	7.18723	6.74179	0.103116	-0.0596294	0.0434867	-0.0923059	-0.0488192
	sp|P49757|NUMB_HUMAN	NUMB	Protein numb homolog OS=Homo sapiens OX=9606 GN=NUMB PE=1 SV=2	1256	10	6.64205	7.13397	6.92569	7.48114	0.103076	-0.0427463	0.0603296	0.111299	0.171629
	sp|Q9ULH1-2|ASAP1_HUMAN	ASAP1	Isoform 1 of Arf-GAP with SH3 domain, ANK repeat and PH domain-containing protein 1 OS=Homo sapiens OX=9606 GN=ASAP1	1648	10	6.80404	7.30678	6.54137	7.44083	0.102845	-0.159644	-0.0567995	0.185871	0.129071
	sp|Q9GZT6|CC90B_HUMAN	CCDC90B	Coiled-coil domain-containing protein 90B, mitochondrial OS=Homo sapiens OX=9606 GN=CCDC90B PE=1 SV=2	4106	11	6.48766	6.96616	7.02269	7.54835	0.102665	0.0116605	0.114325	0.104138	0.218463
	sp|P08123|CO1A2_HUMAN	COL1A2	Collagen alpha-2(I) chain OS=Homo sapiens OX=9606 GN=COL1A2 PE=1 SV=7	1348	24	5.31302	5.70478	5.37253	6.22657	0.102638	-0.0865701	0.0160681	0.212836	0.228905
	sp|P30044|PRDX5_HUMAN	PRDX5	Peroxiredoxin-5, mitochondrial OS=Homo sapiens OX=9606 GN=PRDX5 PE=1 SV=4	2041	16	6.64954	7.13716	7.15229	6.82486	0.102095	0.00305647	0.105151	-0.0676065	0.0375449
	sp|Q9UGP8|SEC63_HUMAN	SEC63	Translocation protein SEC63 homolog OS=Homo sapiens OX=9606 GN=SEC63 PE=1 SV=2	2434	19	6.39066	6.85866	6.10388	5.91756	0.101963	-0.168199	-0.0662364	-0.0447241	-0.110961
	sp|Q9H6W3|RIOX1_HUMAN	RIOX1	Ribosomal oxygenase 1 OS=Homo sapiens OX=9606 GN=RIOX1 PE=1 SV=2	2115	4	7.14465	7.66754	7.20817	6.15723	0.1019	-0.0891311	0.0127687	-0.227352	-0.214583
	sp|O60869|EDF1_HUMAN	EDF1	Endothelial differentiation-related factor 1 OS=Homo sapiens OX=9606 GN=EDF1 PE=1 SV=1	1686	2	6.8494	7.35059	7.08572	7.03179	0.101883	-0.0529453	0.0489379	-0.0110218	0.0379161
	sp|O75157|T22D2_HUMAN	TSC22D2	TSC22 domain family protein 2 OS=Homo sapiens OX=9606 GN=TSC22D2 PE=1 SV=3	981	3	6.17392	6.62535	6.39547	6.03869	0.101811	-0.0509463	0.0508644	-0.082816	-0.0319516
	sp|O60513|B4GT4_HUMAN	B4GALT4	Beta-1,4-galactosyltransferase 4 OS=Homo sapiens OX=9606 GN=B4GALT4 PE=1 SV=1	5726	3	6.78088	7.27473	5.86519	6.87979	0.10142	-0.310715	-0.209295	0.230186	0.0208913
	sp|O00429-2|DNM1L_HUMAN	DNM1L	Isoform 4 of Dynamin-1-like protein OS=Homo sapiens OX=9606 GN=DNM1L	2071	24	6.27174	6.72622	6.47148	6.39498	0.10093	-0.0557007	0.0452296	-0.0171559	0.0280737
	tr|Q5VWC4|Q5VWC4_HUMAN	PSMD4	26S proteasome non-ATPase regulatory subunit 4 OS=Homo sapiens OX=9606 GN=PSMD4 PE=1 SV=1	10	7	6.75177	7.24089	6.92361	7.33603	0.100901	-0.0646429	0.0362576	0.0834744	0.119732
	sp|P02452|CO1A1_HUMAN	COL1A1	Collagen alpha-1(I) chain OS=Homo sapiens OX=9606 GN=COL1A1 PE=1 SV=5	1983	28	5.9318	6.3602	6.47491	6.40253	0.100603	0.0257869	0.12639	-0.0162177	0.110172
	sp|Q9UHA3|RLP24_HUMAN	RSL24D1	Probable ribosome biogenesis protein RLP24 OS=Homo sapiens OX=9606 GN=RSL24D1 PE=1 SV=1	3497	2	7.1857	7.70406	7.05438	6.50223	0.10049	-0.127101	-0.0266108	-0.117584	-0.144195
	sp|O43182|RHG06_HUMAN	ARHGAP6	Rho GTPase-activating protein 6 OS=Homo sapiens OX=9606 GN=ARHGAP6 PE=1 SV=3	3553	2	5.45934	5.85271	6.26982	5.32127	0.100379	0.0993192	0.199698	-0.236654	-0.0369559
	sp|O00233|PSMD9_HUMAN	PSMD9	26S proteasome non-ATPase regulatory subunit 9 OS=Homo sapiens OX=9606 GN=PSMD9 PE=1 SV=3	4078	6	5.18473	5.55828	5.88037	5.71111	0.100371	0.0812676	0.181638	-0.0421358	0.139502
	sp|Q8N8L6|ARL10_HUMAN	ARL10	ADP-ribosylation factor-like protein 10 OS=Homo sapiens OX=9606 GN=ARL10 PE=2 SV=1	4137	3	6.55333	7.02542	6.5736	6.57637	0.100357	-0.0959008	0.00445622	0.000607798	0.00506402
	sp|P06748|NPM_HUMAN	NPM1	Nucleophosmin OS=Homo sapiens OX=9606 GN=NPM1 PE=1 SV=2	3680	28	5.76676	6.18082	5.19807	5.43135	0.100037	-0.249823	-0.149786	0.063337	-0.0864488
	sp|Q9BTW9-4|TBCD_HUMAN	TBCD	Isoform 4 of Tubulin-specific chaperone D OS=Homo sapiens OX=9606 GN=TBCD	2137	10	6.6274	7.1029	7.31125	7.18539	0.0999645	0.0417106	0.141675	-0.0250533	0.116622
	sp|P20962|PTMS_HUMAN	PTMS	Parathymosin OS=Homo sapiens OX=9606 GN=PTMS PE=1 SV=2	137	2	6.68101	7.15962	7.42212	6.97267	0.0998154	0.0519496	0.151765	-0.0901197	0.0616453
	sp|Q07889|SOS1_HUMAN	SOS1	Son of sevenless homolog 1 OS=Homo sapiens OX=9606 GN=SOS1 PE=1 SV=1	1401	9	6.43942	6.90057	6.91073	6.46672	0.0997847	0.00212188	0.101907	-0.095804	0.00610265
	tr|F5H7W8|F5H7W8_HUMAN	C12orf43	Chromosome 12 open reading frame 43 OS=Homo sapiens OX=9606 GN=C12orf43 PE=1 SV=2	1295	3	7.34935	7.87548	6.83631	6.65383	0.0997525	-0.204151	-0.104399	-0.0390321	-0.143431
	sp|Q5VZE5|NAA35_HUMAN	NAA35	N-alpha-acetyltransferase 35, NatC auxiliary subunit OS=Homo sapiens OX=9606 GN=NAA35 PE=1 SV=1	712	9	6.75139	7.23463	6.49237	6.63605	0.0997347	-0.156174	-0.056439	0.031581	-0.024858
	sp|P63173|RL38_HUMAN	RPL38	60S ribosomal protein L38 OS=Homo sapiens OX=9606 GN=RPL38 PE=1 SV=2	6669	3	7.0986	7.60663	6.78377	6.78007	0.0997242	-0.165172	-0.0654473	-0.00078638	-0.0662337
	sp|P09496-2|CLCA_HUMAN	CLTA	Isoform Non-brain of Clathrin light chain A OS=Homo sapiens OX=9606 GN=CLTA	136	5	7.20113	7.716	6.80671	7.2042	0.0996305	-0.180897	-0.0812661	0.0818806	0.000614588
	sp|Q8N697|S15A4_HUMAN	SLC15A4	Solute carrier family 15 member 4 OS=Homo sapiens OX=9606 GN=SLC15A4 PE=1 SV=1	1	8	5.11003	5.47399	5.8779	4.8479	0.099262	0.102709	0.201971	-0.277942	-0.0759709
	tr|J3KQE5|J3KQE5_HUMAN	RAN	GTP-binding nuclear protein Ran (Fragment) OS=Homo sapiens OX=9606 GN=RAN PE=1 SV=1	3848	10	5.04416	5.40337	5.34336	5.10137	0.0992436	-0.0161118	0.0831318	-0.0668634	0.0162683
	sp|Q9NUG6|PDRG1_HUMAN	PDRG1	p53 and DNA damage-regulated protein 1 OS=Homo sapiens OX=9606 GN=PDRG1 PE=1 SV=2	5615	2	6.6711	7.14609	6.81207	6.50062	0.0992287	-0.0690612	0.0301675	-0.0675156	-0.0373481
	sp|Q9Y3A5|SBDS_HUMAN	SBDS	Ribosome maturation protein SBDS OS=Homo sapiens OX=9606 GN=SBDS PE=1 SV=4	3476	10	6.30071	6.7483	6.52475	7.34281	0.0990098	-0.0486008	0.050409	0.17041	0.220819
	sp|Q92805|GOGA1_HUMAN	GOLGA1	Golgin subfamily A member 1 OS=Homo sapiens OX=9606 GN=GOLGA1 PE=1 SV=3	118	5	6.10842	6.54151	6.79665	5.85562	0.0988237	0.0552009	0.154025	-0.215003	-0.0609786
	sp|P52594-4|AGFG1_HUMAN	AGFG1	Isoform 4 of Arf-GAP domain and FG repeat-containing protein 1 OS=Homo sapiens OX=9606 GN=AGFG1	5817	7	5.21005	5.57895	4.95984	5.70755	0.0986973	-0.1697	-0.0710027	0.202577	0.131574
	sp|Q8NCN5|PDPR_HUMAN	PDPR	Pyruvate dehydrogenase phosphatase regulatory subunit, mitochondrial OS=Homo sapiens OX=9606 GN=PDPR PE=1 SV=2	2856	13	6.31719	6.76328	6.91702	6.52779	0.0984401	0.0324268	0.130867	-0.0835549	0.047312
	sp|Q99436|PSB7_HUMAN	PSMB7	Proteasome subunit beta type-7 OS=Homo sapiens OX=9606 GN=PSMB7 PE=1 SV=1	2742	6	5.72675	6.13111	6.00527	5.97827	0.0984325	-0.0299196	0.0685129	-0.00650186	0.0620111
	sp|P35998|PRS7_HUMAN	PSMC2	26S proteasome regulatory subunit 7 OS=Homo sapiens OX=9606 GN=PSMC2 PE=1 SV=3	612	15	6.23123	6.66883	6.50353	6.6471	0.0979168	-0.03621	0.0617068	0.0315021	0.0932089
	sp|Q969X0|RIPL2_HUMAN	RILPL2	RILP-like protein 2 OS=Homo sapiens OX=9606 GN=RILPL2 PE=1 SV=1	3573	3	5.48138	5.86613	6.43763	5.04885	0.0978708	0.13412	0.231991	-0.350576	-0.118585
	sp|P09417|DHPR_HUMAN	QDPR	Dihydropteridine reductase OS=Homo sapiens OX=9606 GN=QDPR PE=1 SV=2	296	13	6.12957	6.55864	6.80978	6.45498	0.0976093	0.0542119	0.151821	-0.0771952	0.074626
	sp|P49327|FAS_HUMAN	FASN	Fatty acid synthase OS=Homo sapiens OX=9606 GN=FASN PE=1 SV=3	163	28	6.53413	6.9914	6.59568	5.68255	0.0975848	-0.0840582	0.0135266	-0.214985	-0.201459
	sp|Q9C0C2|TB182_HUMAN	TNKS1BP1	182 kDa tankyrase-1-binding protein OS=Homo sapiens OX=9606 GN=TNKS1BP1 PE=1 SV=4	461	26	5.79514	6.19998	6.67447	8.0648	0.0974217	0.106389	0.20381	0.272986	0.476796
	sp|Q96PE2|ARHGH_HUMAN	ARHGEF17	Rho guanine nucleotide exchange factor 17 OS=Homo sapiens OX=9606 GN=ARHGEF17 PE=1 SV=1	491	16	6.66183	7.12672	7.2586	6.31177	0.0973211	0.0264517	0.123773	-0.201647	-0.0778743
	sp|Q9BW66-3|CINP_HUMAN	CINP	Isoform 3 of Cyclin-dependent kinase 2-interacting protein OS=Homo sapiens OX=9606 GN=CINP	5659	3	7.12963	7.62637	7.12308	6.49676	0.09717	-0.0984953	-0.00132534	-0.132781	-0.134106
	sp|Q96JJ7|TMX3_HUMAN	TMX3	Protein disulfide-isomerase TMX3 OS=Homo sapiens OX=9606 GN=TMX3 PE=1 SV=2	3631	13	6.87718	7.35626	6.91828	6.64833	0.0971547	-0.0885601	0.00859456	-0.0574193	-0.0488247
	sp|Q9Y399|RT02_HUMAN	MRPS2	28S ribosomal protein S2, mitochondrial OS=Homo sapiens OX=9606 GN=MRPS2 PE=1 SV=1	5392	5	6.26451	6.70087	7.33399	5.76238	0.097146	0.130251	0.227397	-0.347934	-0.120537
	sp|Q5VT25-6|MRCKA_HUMAN	CDC42BPA	Isoform 6 of Serine/threonine-protein kinase MRCK alpha OS=Homo sapiens OX=9606 GN=CDC42BPA	1666	16	6.03027	6.44866	6.17528	6.68517	0.0967753	-0.0624933	0.0342819	0.114459	0.148741
	sp|Q9NSY0|NRBP2_HUMAN	NRBP2	Nuclear receptor-binding protein 2 OS=Homo sapiens OX=9606 GN=NRBP2 PE=1 SV=2	2186	2	5.30829	5.67657	5.83936	4.94487	0.0967732	0.0407904	0.137564	-0.239877	-0.102314
	sp|Q709F0|ACD11_HUMAN	ACAD11	Acyl-CoA dehydrogenase family member 11 OS=Homo sapiens OX=9606 GN=ACAD11 PE=1 SV=3	1898	5	6.97427	7.45809	7.60588	5.53378	0.0967627	0.0283106	0.125073	-0.45885	-0.333776
	sp|Q9UQ90|SPG7_HUMAN	SPG7	Paraplegin OS=Homo sapiens OX=9606 GN=SPG7 PE=1 SV=2	133	9	6.43721	6.8837	7.01624	6.25669	0.0967501	0.0275139	0.124264	-0.165299	-0.0410352
	sp|P62266|RS23_HUMAN	RPS23	40S ribosomal protein S23 OS=Homo sapiens OX=9606 GN=RPS23 PE=1 SV=3	1542	7	6.22061	6.652	5.72456	6.09472	0.0967306	-0.216622	-0.119891	0.0903943	-0.0294969
	sp|Q86UE4|LYRIC_HUMAN	MTDH	Protein LYRIC OS=Homo sapiens OX=9606 GN=MTDH PE=1 SV=2	4571	15	6.76555	7.23437	6.91781	6.22907	0.0966588	-0.064552	0.0321068	-0.151299	-0.119192
	sp|P62906|RL10A_HUMAN	RPL10A	60S ribosomal protein L10a OS=Homo sapiens OX=9606 GN=RPL10A PE=1 SV=2	2846	17	6.54494	6.99806	6.53499	6.44089	0.0965751	-0.098769	-0.00219384	-0.0209242	-0.0231181
	sp|Q07021|C1QBP_HUMAN	C1QBP	Complement component 1 Q subcomponent-binding protein, mitochondrial OS=Homo sapiens OX=9606 GN=C1QBP PE=1 SV=1	1269	11	5.99144	6.40609	6.4269	6.56728	0.0965428	0.00467858	0.101221	0.0311715	0.132393
	sp|Q96P47-4|AGAP3_HUMAN	AGAP3	Isoform 4 of Arf-GAP with GTPase, ANK repeat and PH domain-containing protein 3 OS=Homo sapiens OX=9606 GN=AGAP3	2725	3	6.60121	7.05795	7.29948	7.61285	0.0965194	0.0485442	0.145064	0.0606423	0.205706
	sp|Q9C0D3|ZY11B_HUMAN	ZYG11B	Protein zyg-11 homolog B OS=Homo sapiens OX=9606 GN=ZYG11B PE=1 SV=2	3908	2	7.07131	7.56054	7.03014	6.96181	0.0965111	-0.104935	-0.00842409	-0.014092	-0.0225161
	sp|Q9GZP4|PITH1_HUMAN	PITHD1	PITH domain-containing protein 1 OS=Homo sapiens OX=9606 GN=PITHD1 PE=1 SV=1	4054	7	6.18216	6.60934	7.74328	7.58288	0.0963952	0.228438	0.324834	-0.0301995	0.294634
	sp|P23396|RS3_HUMAN	RPS3	40S ribosomal protein S3 OS=Homo sapiens OX=9606 GN=RPS3 PE=1 SV=2	1005	17	6.47377	6.92076	6.06398	6.56661	0.0963244	-0.190666	-0.0943412	0.114883	0.0205423
	tr|I3L504|I3L504_HUMAN	EIF5A	Eukaryotic translation initiation factor 5A-1 OS=Homo sapiens OX=9606 GN=EIF5A PE=1 SV=1	6122	14	6.14167	6.56543	6.18816	6.58616	0.09626	-0.085379	0.0108811	0.0899274	0.100808
	sp|Q9UK45|LSM7_HUMAN	LSM7	U6 snRNA-associated Sm-like protein LSm7 OS=Homo sapiens OX=9606 GN=LSM7 PE=1 SV=1	1344	3	6.97778	7.45881	6.93213	7.54871	0.096176	-0.105646	-0.00946974	0.122931	0.113461
	sp|Q16851|UGPA_HUMAN	UGP2	UTP--glucose-1-phosphate uridylyltransferase OS=Homo sapiens OX=9606 GN=UGP2 PE=1 SV=5	1559	24	6.46097	6.90562	7.2357	5.76897	0.0960194	0.0673613	0.163381	-0.326819	-0.163438
	sp|Q9H0U6|RM18_HUMAN	MRPL18	39S ribosomal protein L18, mitochondrial OS=Homo sapiens OX=9606 GN=MRPL18 PE=1 SV=1	6394	2	6.35712	6.79443	8.25032	5.52171	0.0959784	0.280098	0.376077	-0.579336	-0.203259
	sp|Q12893|TM115_HUMAN	TMEM115	Transmembrane protein 115 OS=Homo sapiens OX=9606 GN=TMEM115 PE=1 SV=1	2435	5	7.47936	7.99376	6.89158	6.11557	0.0959588	-0.214039	-0.118081	-0.172349	-0.29043
	sp|Q99575|POP1_HUMAN	POP1	Ribonucleases P/MRP protein subunit POP1 OS=Homo sapiens OX=9606 GN=POP1 PE=1 SV=2	92	8	7.13426	7.62469	6.75102	6.4143	0.0959143	-0.175573	-0.0796587	-0.0738144	-0.153473
	sp|Q14011|CIRBP_HUMAN	CIRBP	Cold-inducible RNA-binding protein OS=Homo sapiens OX=9606 GN=CIRBP PE=1 SV=1	3544	3	5.98628	6.39676	6.06406	5.92496	0.0956823	-0.0770577	0.0186247	-0.0334802	-0.0148556
	sp|P22087|FBRL_HUMAN	FBL	rRNA 2'-O-methyltransferase fibrillarin OS=Homo sapiens OX=9606 GN=FBL PE=1 SV=2	2255	9	7.48749	7.99865	6.62861	6.69611	0.0952744	-0.27105	-0.175776	0.0146158	-0.16116
	sp|P28290|ITPI2_HUMAN	ITPRID2	Protein ITPRID2 OS=Homo sapiens OX=9606 GN=ITPRID2 PE=1 SV=3	2708	11	7.05775	7.53944	6.93218	6.34865	0.0952497	-0.121149	-0.0258992	-0.126857	-0.152757
	tr|Q495G5|Q495G5_HUMAN	MMAA	MMAA protein OS=Homo sapiens OX=9606 GN=MMAA PE=1 SV=1	3749	6	6.36194	6.79527	7.10405	7.2087	0.0950656	0.0641112	0.159177	0.0210964	0.180273
	sp|Q9Y266|NUDC_HUMAN	NUDC	Nuclear migration protein nudC OS=Homo sapiens OX=9606 GN=NUDC PE=1 SV=1	3523	12	5.60529	5.98701	5.55933	5.35939	0.0950467	-0.106926	-0.0118793	-0.0528409	-0.0647202
	sp|Q9Y6C9|MTCH2_HUMAN	MTCH2	Mitochondrial carrier homolog 2 OS=Homo sapiens OX=9606 GN=MTCH2 PE=1 SV=1	4614	14	6.47055	6.91048	7.09604	6.3376	0.0948976	0.0382275	0.133125	-0.163078	-0.0299529
	sp|Q04837|SSBP_HUMAN	SSBP1	Single-stranded DNA-binding protein, mitochondrial OS=Homo sapiens OX=9606 GN=SSBP1 PE=1 SV=1	4320	10	6.30288	6.7302	6.9763	6.83496	0.0946397	0.0518123	0.146452	-0.0295295	0.116922
	sp|Q93008|USP9X_HUMAN	USP9X	Probable ubiquitin carboxyl-terminal hydrolase FAF-X OS=Homo sapiens OX=9606 GN=USP9X PE=1 SV=3	1916	25	6.57828	7.02306	6.53253	6.76727	0.0943893	-0.104459	-0.0100693	0.0509339	0.0408646
	sp|Q15434|RBMS2_HUMAN	RBMS2	RNA-binding motif, single-stranded-interacting protein 2 OS=Homo sapiens OX=9606 GN=RBMS2 PE=1 SV=1	2276	5	6.79901	7.25831	6.7933	6.46866	0.0943104	-0.0955218	-0.00121142	-0.0706468	-0.0718582
	sp|Q9UHW5-2|GPN3_HUMAN	GPN3	Isoform 2 of GPN-loop GTPase 3 OS=Homo sapiens OX=9606 GN=GPN3	5065	2	7.10291	7.58271	6.82035	7.51054	0.094302	-0.152868	-0.0585658	0.139071	0.0805048
	sp|Q9UHI6|DDX20_HUMAN	DDX20	Probable ATP-dependent RNA helicase DDX20 OS=Homo sapiens OX=9606 GN=DDX20 PE=1 SV=2	214	8	6.74425	7.1997	6.83197	6.16131	0.0942795	-0.0756352	0.0186443	-0.149065	-0.13042
	sp|Q14161|GIT2_HUMAN	GIT2	ARF GTPase-activating protein GIT2 OS=Homo sapiens OX=9606 GN=GIT2 PE=1 SV=2	1457	9	6.39515	6.82524	6.43668	6.73606	0.0939009	-0.084562	0.00933892	0.0655879	0.0749268
	sp|P07954|FUMH_HUMAN	FH	Fumarate hydratase, mitochondrial OS=Homo sapiens OX=9606 GN=FH PE=1 SV=3	22	16	6.38354	6.81261	7.00569	6.39553	0.093851	0.0403213	0.134172	-0.131465	0.00270685
	tr|K7EM18|K7EM18_HUMAN	EIF1	Eukaryotic translation initiation factor 1 OS=Homo sapiens OX=9606 GN=EIF1 PE=1 SV=1	5218	3	5.79411	6.18355	5.73582	6.85692	0.093849	-0.108438	-0.0145886	0.257562	0.242974
	sp|Q16762|THTR_HUMAN	TST	Thiosulfate sulfurtransferase OS=Homo sapiens OX=9606 GN=TST PE=1 SV=4	4278	9	6.66714	7.11501	7.35137	7.27267	0.0937977	0.047146	0.140944	-0.0155264	0.125417
	sp|Q9Y4D1|DAAM1_HUMAN	DAAM1	Disheveled-associated activator of morphogenesis 1 OS=Homo sapiens OX=9606 GN=DAAM1 PE=1 SV=2	4982	3	6.25001	6.66973	6.66064	10.6384	0.0937706	-0.00196647	0.0918042	0.675554	0.767358
	sp|Q969S8|HDA10_HUMAN	HDAC10	Polyamine deacetylase HDAC10 OS=Homo sapiens OX=9606 GN=HDAC10 PE=1 SV=1	51	2	6.74406	7.19686	7.89943	5.39032	0.0937503	0.134382	0.228133	-0.551378	-0.323246
	sp|Q96HA8|NTAQ1_HUMAN	WDYHV1	Protein N-terminal glutamine amidohydrolase OS=Homo sapiens OX=9606 GN=WDYHV1 PE=1 SV=2	6508	4	6.62104	7.0646	6.55703	6.83126	0.0935493	-0.107566	-0.0140172	0.0591103	0.0450931
	sp|Q7L8J4|3BP5L_HUMAN	SH3BP5L	SH3 domain-binding protein 5-like OS=Homo sapiens OX=9606 GN=SH3BP5L PE=1 SV=1	2484	2	5.8787	6.27223	7.42344	6.5406	0.0934797	0.243109	0.336589	-0.182663	0.153926
	tr|A0A087WUM0|A0A087WUM0_HUMAN	SYNJ2BP-COX16	SYNJ2BP-COX16 readthrough (Fragment) OS=Homo sapiens OX=9606 GN=SYNJ2BP-COX16 PE=4 SV=1	5750	4	6.95644	7.42146	7.1964	6.84393	0.0933532	-0.0444267	0.0489265	-0.0724514	-0.0235249
	tr|A0A087WT20|A0A087WT20_HUMAN	DCAF13	DDB1- and CUL4-associated factor 13 OS=Homo sapiens OX=9606 GN=DCAF13 PE=1 SV=1	3836	7	5.66388	6.04213	4.96396	5.5281	0.0932665	-0.283566	-0.1903	0.15529	-0.0350091
	sp|P15291|B4GT1_HUMAN	B4GALT1	Beta-1,4-galactosyltransferase 1 OS=Homo sapiens OX=9606 GN=B4GALT1 PE=1 SV=5	3607	7	5.82268	6.21099	5.5347	7.53535	0.0931399	-0.166318	-0.0731782	0.445169	0.37199
	sp|Q6P6B7|ANR16_HUMAN	ANKRD16	Ankyrin repeat domain-containing protein 16 OS=Homo sapiens OX=9606 GN=ANKRD16 PE=1 SV=1	4225	2	6.85236	7.30933	6.76673	8.45727	0.0931389	-0.11128	-0.0181411	0.321733	0.303592
	sp|Q9Y259|CHKB_HUMAN	CHKB	Choline/ethanolamine kinase OS=Homo sapiens OX=9606 GN=CHKB PE=1 SV=3	2569	4	6.67878	7.12413	7.46117	6.91215	0.0931306	0.0666867	0.159817	-0.110268	0.0495496
	sp|P10109|ADX_HUMAN	FDX1	Adrenodoxin, mitochondrial OS=Homo sapiens OX=9606 GN=FDX1 PE=1 SV=1	3785	5	6.30209	6.72189	6.99445	7.20201	0.0930359	0.0573441	0.15038	0.0421903	0.19257
	sp|P62753|RS6_HUMAN	RPS6	40S ribosomal protein S6 OS=Homo sapiens OX=9606 GN=RPS6 PE=1 SV=1	3923	8	6.15582	6.5658	5.68687	5.76697	0.0930197	-0.207337	-0.114317	0.0201791	-0.0941383
	sp|P41236|IPP2_HUMAN	PPP1R2	Protein phosphatase inhibitor 2 OS=Homo sapiens OX=9606 GN=PPP1R2 PE=1 SV=2	6163	3	6.83463	7.28942	7.44236	6.48682	0.0929407	0.0299561	0.122897	-0.198248	-0.0753514
	sp|Q9UKD2|MRT4_HUMAN	MRTO4	mRNA turnover protein 4 homolog OS=Homo sapiens OX=9606 GN=MRTO4 PE=1 SV=2	201	8	7.32737	7.81477	6.78601	6.92874	0.0929067	-0.203639	-0.110732	0.0300298	-0.0807021
	sp|P61289-2|PSME3_HUMAN	PSME3	Isoform 2 of Proteasome activator complex subunit 3 OS=Homo sapiens OX=9606 GN=PSME3	6206	2	7.2537	7.73603	6.71705	6.47187	0.0928776	-0.203766	-0.110889	-0.0536451	-0.164534
	sp|Q9Y6K9-2|NEMO_HUMAN	IKBKG	Isoform 2 of NF-kappa-B essential modulator OS=Homo sapiens OX=9606 GN=IKBKG	692	5	7.18378	7.65919	6.95906	6.85838	0.09245	-0.1383	-0.0458504	-0.0210243	-0.0668747
	sp|Q96NT0|CC115_HUMAN	CCDC115	Coiled-coil domain-containing protein 115 OS=Homo sapiens OX=9606 GN=CCDC115 PE=1 SV=1	3808	2	7.15506	7.62833	7.1033	6.51502	0.092404	-0.102879	-0.0104751	-0.124719	-0.135194
	sp|O60506|HNRPQ_HUMAN	SYNCRIP	Heterogeneous nuclear ribonucleoprotein Q OS=Homo sapiens OX=9606 GN=SYNCRIP PE=1 SV=2	719	12	6.57381	7.00855	6.61694	6.83886	0.092387	-0.0829514	0.00943553	0.0475913	0.0570268
	tr|A0A0C4DG17|A0A0C4DG17_HUMAN	RPSA	40S ribosomal protein SA OS=Homo sapiens OX=9606 GN=RPSA PE=1 SV=1	724	17	5.76631	6.14764	5.36497	5.52332	0.0923851	-0.196462	-0.104077	0.041966	-0.0621114
	tr|A0A3B3IUD7|A0A3B3IUD7_HUMAN	PDCD11	Programmed cell death 11, isoform CRA_a OS=Homo sapiens OX=9606 GN=PDCD11 PE=1 SV=1	1208	23	6.5873	7.02286	5.87969	5.80453	0.09237	-0.256318	-0.163948	-0.0185604	-0.182509
	sp|Q9P2R7|SUCB1_HUMAN	SUCLA2	Succinate--CoA ligase [ADP-forming] subunit beta, mitochondrial OS=Homo sapiens OX=9606 GN=SUCLA2 PE=1 SV=3	1929	14	6.46269	6.88922	6.76807	6.94247	0.0922052	-0.0255948	0.0666104	0.0367038	0.103314
	tr|A0A494C039|A0A494C039_HUMAN	HYOU1	Hypoxia up-regulated protein 1 OS=Homo sapiens OX=9606 GN=HYOU1 PE=1 SV=1	376	29	6.33979	6.75792	7.02908	6.20276	0.0921457	0.0567552	0.148901	-0.180424	-0.0315228
	sp|Q15691|MARE1_HUMAN	MAPRE1	Microtubule-associated protein RP/EB family member 1 OS=Homo sapiens OX=9606 GN=MAPRE1 PE=1 SV=3	1447	11	6.95368	7.41223	6.50593	6.82562	0.0921309	-0.188153	-0.0960224	0.0692052	-0.0268173
	sp|P16035|TIMP2_HUMAN	TIMP2	Metalloproteinase inhibitor 2 OS=Homo sapiens OX=9606 GN=TIMP2 PE=1 SV=2	5152	6	5.90577	6.29499	6.84164	5.74559	0.0920789	0.120139	0.212218	-0.251889	-0.0396714
	sp|P54852|EMP3_HUMAN	EMP3	Epithelial membrane protein 3 OS=Homo sapiens OX=9606 GN=EMP3 PE=1 SV=1	5093	4	6.44941	6.87408	6.74212	5.45831	0.0919995	-0.0279633	0.0640362	-0.30475	-0.240714
	sp|P07437|TBB5_HUMAN	TUBB	Tubulin beta chain OS=Homo sapiens OX=9606 GN=TUBB PE=1 SV=2	343	12	1.32047	1.40739	1.21125	1.53572	0.0919706	-0.216524	-0.124553	0.342417	0.217864
	sp|Q9NRN7|ADPPT_HUMAN	AASDHPPT	L-aminoadipate-semialdehyde dehydrogenase-phosphopantetheinyl transferase OS=Homo sapiens OX=9606 GN=AASDHPPT PE=1 SV=2	1113	7	5.39706	5.75232	5.1832	5.41388	0.0919703	-0.1503	-0.0583302	0.0628203	0.00449008
	sp|O15357|SHIP2_HUMAN	INPPL1	Phosphatidylinositol 3,4,5-trisphosphate 5-phosphatase 2 OS=Homo sapiens OX=9606 GN=INPPL1 PE=1 SV=2	2063	7	7.21033	7.68381	6.98606	6.7006	0.0917572	-0.137343	-0.0455863	-0.0601877	-0.105774
	sp|P63220|RS21_HUMAN	RPS21	40S ribosomal protein S21 OS=Homo sapiens OX=9606 GN=RPS21 PE=1 SV=1	709	4	6.1314	6.53344	6.20073	6.44444	0.0916255	-0.0754048	0.0162208	0.0556166	0.0718374
	sp|P08238|HS90B_HUMAN	HSP90AB1	Heat shock protein HSP 90-beta OS=Homo sapiens OX=9606 GN=HSP90AB1 PE=1 SV=4	723	22	6.09309	6.49247	6.23529	5.7135	0.0915949	-0.0583127	0.0332822	-0.126081	-0.0927985
	sp|Q15262-2|PTPRK_HUMAN	PTPRK	Isoform 2 of Receptor-type tyrosine-protein phosphatase kappa OS=Homo sapiens OX=9606 GN=PTPRK	556	9	6.46705	6.8903	5.78414	7.25853	0.0914591	-0.252463	-0.161004	0.327575	0.16657
	sp|Q08499-6|PDE4D_HUMAN	PDE4D	Isoform 5 of cAMP-specific 3',5'-cyclic phosphodiesterase 4D OS=Homo sapiens OX=9606 GN=PDE4D	2774	8	4.54718	4.84472	5.81015	5.2934	0.0914432	0.26216	0.353603	-0.134381	0.219222
	sp|P09972|ALDOC_HUMAN	ALDOC	Fructose-bisphosphate aldolase C OS=Homo sapiens OX=9606 GN=ALDOC PE=1 SV=2	406	8	5.7966	6.17589	8.04008	4.34033	0.0914393	0.380563	0.472003	-0.889403	-0.417401
	sp|Q13443|ADAM9_HUMAN	ADAM9	Disintegrin and metalloproteinase domain-containing protein 9 OS=Homo sapiens OX=9606 GN=ADAM9 PE=1 SV=1	3133	8	5.67603	6.04725	5.73191	6.30359	0.091397	-0.0772645	0.0141325	0.137158	0.151291
	sp|O43681|ASNA_HUMAN	ASNA1	ATPase ASNA1 OS=Homo sapiens OX=9606 GN=ASNA1 PE=1 SV=2	5112	11	6.87189	7.32095	7.10002	6.56514	0.0913239	-0.0442071	0.0471168	-0.112997	-0.0658801
	sp|Q9H330|TM245_HUMAN	TMEM245	Transmembrane protein 245 OS=Homo sapiens OX=9606 GN=TMEM245 PE=1 SV=3	2038	7	6.30686	6.71835	7.05684	5.71489	0.091185	0.0709139	0.162099	-0.304296	-0.142197
	sp|P49207|RL34_HUMAN	RPL34	60S ribosomal protein L34 OS=Homo sapiens OX=9606 GN=RPL34 PE=1 SV=3	1201	5	7.18386	7.6524	6.70869	6.69361	0.0911543	-0.189882	-0.0987275	-0.00324658	-0.101974
	sp|Q12846|STX4_HUMAN	STX4	Syntaxin-4 OS=Homo sapiens OX=9606 GN=STX4 PE=1 SV=2	6550	5	6.81636	7.2604	6.98245	7.93751	0.0910475	-0.056315	0.0347325	0.184954	0.219687
	sp|Q13596|SNX1_HUMAN	SNX1	Sorting nexin-1 OS=Homo sapiens OX=9606 GN=SNX1 PE=1 SV=3	2108	15	6.12548	6.52451	6.90687	7.10869	0.0910459	0.0821632	0.173209	0.0415527	0.214762
	sp|Q8IVB5|LIX1L_HUMAN	LIX1L	LIX1-like protein OS=Homo sapiens OX=9606 GN=LIX1L PE=2 SV=1	4501	3	6.32657	6.73863	7.41082	8.16975	0.0910318	0.137177	0.228209	0.140659	0.368868
	tr|J3KNS1|J3KNS1_HUMAN	AGTPBP1	Cytosolic carboxypeptidase 1 OS=Homo sapiens OX=9606 GN=AGTPBP1 PE=1 SV=1	5097	2	6.96639	7.41987	7.042	7.29462	0.090984	-0.0754093	0.0155747	0.0508466	0.0664213
	sp|P78371|TCPB_HUMAN	CCT2	T-complex protein 1 subunit beta OS=Homo sapiens OX=9606 GN=CCT2 PE=1 SV=4	257	18	5.94389	6.33052	6.16733	6.08572	0.0909158	-0.0376784	0.0532374	-0.0192177	0.0340197
	sp|P60953|CDC42_HUMAN	CDC42	Cell division control protein 42 homolog OS=Homo sapiens OX=9606 GN=CDC42 PE=1 SV=2	2530	9	6.27324	6.68043	6.44675	7.08001	0.0907287	-0.0513682	0.0393605	0.13518	0.174541
	sp|P49589-3|SYCC_HUMAN	CARS	Isoform 3 of Cysteine--tRNA ligase, cytoplasmic OS=Homo sapiens OX=9606 GN=CARS	1807	20	6.82153	7.26411	6.78207	7.2283	0.0906907	-0.0990611	-0.00837039	0.0919314	0.083561
	sp|Q93100|KPBB_HUMAN	PHKB	Phosphorylase b kinase regulatory subunit beta OS=Homo sapiens OX=9606 GN=PHKB PE=1 SV=3	3087	5	6.20601	6.6084	8.02578	6.70104	0.0906357	0.28034	0.370975	-0.260256	0.110719
	sp|Q86YS7-5|C2CD5_HUMAN	C2CD5	Isoform 5 of C2 domain-containing protein 5 OS=Homo sapiens OX=9606 GN=C2CD5	1639	5	4.92398	5.24308	5.36192	5.73386	0.0905906	0.0323351	0.122926	0.0967548	0.219681
	sp|Q4G0J3-3|LARP7_HUMAN	LARP7	Isoform 3 of La-related protein 7 OS=Homo sapiens OX=9606 GN=LARP7	1605	8	6.4653	6.8839	6.48409	6.56397	0.0905088	-0.0863217	0.00418717	0.0176642	0.0218513
	sp|Q4LDG9|DNAL1_HUMAN	DNAL1	Dynein light chain 1, axonemal OS=Homo sapiens OX=9606 GN=DNAL1 PE=1 SV=1	4379	2	6.9788	7.4294	6.85501	7.12662	0.0902668	-0.116086	-0.0258192	0.0560579	0.0302387
	sp|Q04760|LGUL_HUMAN	GLO1	Lactoylglutathione lyase OS=Homo sapiens OX=9606 GN=GLO1 PE=1 SV=4	3154	5	7.11239	7.57149	6.79363	5.83014	0.0902422	-0.156393	-0.0661511	-0.220653	-0.286804
	sp|Q8WU90|ZC3HF_HUMAN	ZC3H15	Zinc finger CCCH domain-containing protein 15 OS=Homo sapiens OX=9606 GN=ZC3H15 PE=1 SV=1	3008	9	6.60866	7.03472	6.86494	6.67187	0.0901338	-0.0352449	0.054889	-0.0411574	0.0137316
	sp|O95571|ETHE1_HUMAN	ETHE1	Persulfide dioxygenase ETHE1, mitochondrial OS=Homo sapiens OX=9606 GN=ETHE1 PE=1 SV=2	4504	8	5.8373	6.21329	6.73583	7.39546	0.0900554	0.116499	0.206555	0.134784	0.341339
	sp|Q8TER0|SNED1_HUMAN	SNED1	Sushi, nidogen and EGF-like domain-containing protein 1 OS=Homo sapiens OX=9606 GN=SNED1 PE=2 SV=2	1346	4	6.34903	6.75786	8.66329	4.34978	0.0900303	0.358349	0.448379	-0.993971	-0.545591
	sp|Q96ME7|ZN512_HUMAN	ZNF512	Zinc finger protein 512 OS=Homo sapiens OX=9606 GN=ZNF512 PE=1 SV=2	5931	3	7.27079	7.73897	7.13383	6.08388	0.0900295	-0.117465	-0.0274353	-0.229684	-0.25712
	sp|Q9NUT2|ABCB8_HUMAN	ABCB8	ATP-binding cassette sub-family B member 8, mitochondrial OS=Homo sapiens OX=9606 GN=ABCB8 PE=1 SV=3	831	7	7.31582	7.7866	7.09517	6.06086	0.0899733	-0.134157	-0.0441837	-0.227313	-0.271497
	sp|O00505|IMA4_HUMAN	KPNA3	Importin subunit alpha-4 OS=Homo sapiens OX=9606 GN=KPNA3 PE=1 SV=2	2899	6	6.86525	7.30581	6.98018	7.80287	0.0897327	-0.0657803	0.0239523	0.160741	0.184693
	sp|P49411|EFTU_HUMAN	TUFM	Elongation factor Tu, mitochondrial OS=Homo sapiens OX=9606 GN=TUFM PE=1 SV=2	661	17	5.96555	6.34831	6.54324	6.37183	0.0897182	0.0436311	0.133349	-0.0382967	0.0950526
	sp|O14920|IKKB_HUMAN	IKBKB	Inhibitor of nuclear factor kappa-B kinase subunit beta OS=Homo sapiens OX=9606 GN=IKBKB PE=1 SV=1	1861	4	7.27085	7.73712	6.97046	6.57666	0.0896732	-0.150543	-0.0608702	-0.0838999	-0.14477
	sp|Q9Y6E0|STK24_HUMAN	STK24	Serine/threonine-protein kinase 24 OS=Homo sapiens OX=9606 GN=STK24 PE=1 SV=1	378	10	5.39626	5.73939	5.22891	5.58258	0.0889367	-0.134386	-0.0454496	0.0944205	0.0489709
	sp|O43633|CHM2A_HUMAN	CHMP2A	Charged multivesicular body protein 2a OS=Homo sapiens OX=9606 GN=CHMP2A PE=1 SV=1	2210	4	6.86423	7.30027	6.87895	8.11641	0.088852	-0.0857608	0.00309118	0.238652	0.241744
	sp|Q9UHK6-5|AMACR_HUMAN	AMACR	Isoform 4 of Alpha-methylacyl-CoA racemase OS=Homo sapiens OX=9606 GN=AMACR	4625	3	7.52476	8.00192	6.89404	6.02785	0.0887006	-0.214997	-0.126297	-0.193706	-0.320003
	sp|Q9NWV4|CZIB_HUMAN	CZIB	CXXC motif containing zinc binding protein OS=Homo sapiens OX=9606 GN=CZIB PE=1 SV=1	2479	5	6.00961	6.39064	6.74954	7.01455	0.0886898	0.0788287	0.167519	0.0555607	0.223079
	sp|Q7Z2Z2|EFL1_HUMAN	EFL1	Elongation factor-like GTPase 1 OS=Homo sapiens OX=9606 GN=EFL1 PE=1 SV=2	3229	8	7.26721	7.72796	6.86358	6.91649	0.0886867	-0.171127	-0.08244	0.0110795	-0.0713605
	sp|O00541|PESC_HUMAN	PES1	Pescadillo homolog OS=Homo sapiens OX=9606 GN=PES1 PE=1 SV=1	3505	6	7.19974	7.65555	6.35236	6.43499	0.0885618	-0.269214	-0.180652	0.018646	-0.162006
	sp|O60749|SNX2_HUMAN	SNX2	Sorting nexin-2 OS=Homo sapiens OX=9606 GN=SNX2 PE=1 SV=2	2108	14	5.8697	6.24068	6.57789	6.26859	0.0884149	0.0759217	0.164337	-0.069482	0.0948545
	sp|O00258|WRB_HUMAN	WRB	Tail-anchored protein insertion receptor WRB OS=Homo sapiens OX=9606 GN=WRB PE=1 SV=2	6435	2	6.96439	7.40407	7.34189	6.42164	0.0883222	-0.012167	0.0761552	-0.19321	-0.117055
	tr|A0A1W2PP11|A0A1W2PP11_HUMAN	PARL	Presenilins-associated rhomboid-like protein, mitochondrial OS=Homo sapiens OX=9606 GN=PARL PE=4 SV=1	825	4	6.29616	6.69334	6.34622	5.96279	0.0882526	-0.0768277	0.0114249	-0.0899116	-0.0784866
	sp|Q3KQU3|MA7D1_HUMAN	MAP7D1	MAP7 domain-containing protein 1 OS=Homo sapiens OX=9606 GN=MAP7D1 PE=1 SV=1	2709	6	5.02401	5.3406	5.2257	4.55865	0.0881644	-0.031378	0.0567864	-0.19702	-0.140233
	sp|O94952|FBX21_HUMAN	FBXO21	F-box only protein 21 OS=Homo sapiens OX=9606 GN=FBXO21 PE=2 SV=2	4657	3	6.93457	7.37087	7.22783	6.85837	0.0880298	-0.028274	0.0597558	-0.0756958	-0.01594
	sp|Q13492|PICAL_HUMAN	PICALM	Phosphatidylinositol-binding clathrin assembly protein OS=Homo sapiens OX=9606 GN=PICALM PE=1 SV=2	2816	8	6.15318	6.53969	6.18312	7.19517	0.0878908	-0.0808888	0.00700203	0.218695	0.225697
	sp|Q8NCE2|MTMRE_HUMAN	MTMR14	Myotubularin-related protein 14 OS=Homo sapiens OX=9606 GN=MTMR14 PE=1 SV=2	3790	3	7.34044	7.80053	6.71784	7.13504	0.0877063	-0.215575	-0.127869	0.0869234	-0.0409454
	sp|O15511|ARPC5_HUMAN	ARPC5	Actin-related protein 2/3 complex subunit 5 OS=Homo sapiens OX=9606 GN=ARPC5 PE=1 SV=3	1473	11	5.58703	5.93717	5.89172	7.18928	0.0876947	-0.011087	0.0766078	0.287159	0.363767
	sp|Q9H0W8|SMG9_HUMAN	SMG9	Protein SMG9 OS=Homo sapiens OX=9606 GN=SMG9 PE=1 SV=1	1445	3	6.955	7.39069	7.16214	6.99507	0.0876579	-0.0453187	0.0423392	-0.0340512	0.00828798
	sp|O14744|ANM5_HUMAN	PRMT5	Protein arginine N-methyltransferase 5 OS=Homo sapiens OX=9606 GN=PRMT5 PE=1 SV=4	270	11	5.53027	5.87658	5.84152	5.70927	0.0876286	-0.00863297	0.0789956	-0.0330371	0.0459585
	sp|Q8TEQ6|GEMI5_HUMAN	GEMIN5	Gem-associated protein 5 OS=Homo sapiens OX=9606 GN=GEMIN5 PE=1 SV=3	3406	13	6.24288	6.63311	5.98075	5.80247	0.087473	-0.149358	-0.0618845	-0.0436601	-0.105545
	sp|O75391|SPAG7_HUMAN	SPAG7	Sperm-associated antigen 7 OS=Homo sapiens OX=9606 GN=SPAG7 PE=1 SV=2	5185	3	7.09534	7.53878	6.99086	6.48776	0.0874586	-0.108861	-0.0214029	-0.107748	-0.129151
	sp|Q9NT62|ATG3_HUMAN	ATG3	Ubiquitin-like-conjugating enzyme ATG3 OS=Homo sapiens OX=9606 GN=ATG3 PE=1 SV=1	1878	3	6.98036	7.41632	6.89689	6.92672	0.0874034	-0.104759	-0.0173551	0.00622675	-0.0111284
	sp|O94763|RMP_HUMAN	URI1	Unconventional prefoldin RPB5 interactor 1 OS=Homo sapiens OX=9606 GN=URI1 PE=1 SV=3	1273	5	6.51112	6.91717	6.96097	6.72447	0.0872769	0.00910575	0.0963827	-0.0498682	0.0465145
	sp|Q9HA77|SYCM_HUMAN	CARS2	Probable cysteine--tRNA ligase, mitochondrial OS=Homo sapiens OX=9606 GN=CARS2 PE=1 SV=1	285	9	5.59511	5.94394	7.55261	6.72152	0.0872514	0.345557	0.432808	-0.168189	0.264619
	tr|G3V180|G3V180_HUMAN	DPP3	Dipeptidyl peptidase 3 OS=Homo sapiens OX=9606 GN=DPP3 PE=1 SV=1	2167	20	6.88849	7.31657	7.14926	6.15982	0.0869783	-0.0333732	0.0536051	-0.214907	-0.161301
	sp|Q9NRL3-3|STRN4_HUMAN	STRN4	Isoform 3 of Striatin-4 OS=Homo sapiens OX=9606 GN=STRN4	822	4	7.30368	7.75723	6.91008	6.6784	0.0869193	-0.16684	-0.0799205	-0.049201	-0.129121
	sp|P53677|AP3M2_HUMAN	AP3M2	AP-3 complex subunit mu-2 OS=Homo sapiens OX=9606 GN=AP3M2 PE=2 SV=1	5255	3	6.39914	6.79651	5.98574	6.10117	0.086916	-0.183264	-0.0963484	0.0275567	-0.0687917
	sp|Q4KMQ2-2|ANO6_HUMAN	ANO6	Isoform 2 of Anoctamin-6 OS=Homo sapiens OX=9606 GN=ANO6	193	9	6.39163	6.78687	7.43564	7.92533	0.0865625	0.131711	0.218274	0.0920125	0.310286
	sp|Q9H1Z4|WDR13_HUMAN	WDR13	WD repeat-containing protein 13 OS=Homo sapiens OX=9606 GN=WDR13 PE=1 SV=2	4162	6	6.67968	7.09252	6.9366	7.95782	0.0865179	-0.0320682	0.0544497	0.198144	0.252594
	sp|P02787|TRFE_HUMAN	TF	Serotransferrin OS=Homo sapiens OX=9606 GN=TF PE=1 SV=3	791	17	6.64147	7.05135	5.89173	5.55674	0.0863962	-0.259207	-0.172811	-0.0844525	-0.257263
	sp|Q9NQE9|HINT3_HUMAN	HINT3	Histidine triad nucleotide-binding protein 3 OS=Homo sapiens OX=9606 GN=HINT3 PE=1 SV=1	4199	4	6.91764	7.34417	6.91557	6.99788	0.0863202	-0.0867513	-0.000431074	0.0170698	0.0166387
	sp|O75381|PEX14_HUMAN	PEX14	Peroxisomal membrane protein PEX14 OS=Homo sapiens OX=9606 GN=PEX14 PE=1 SV=1	2818	4	7.10836	7.54622	7.18352	6.46758	0.0862387	-0.0710648	0.0151739	-0.151464	-0.13629
	sp|P23434|GCSH_HUMAN	GCSH	Glycine cleavage system H protein, mitochondrial OS=Homo sapiens OX=9606 GN=GCSH PE=1 SV=2	6522	7	6.24768	6.63176	6.87678	6.38253	0.0860697	0.0523421	0.138412	-0.107605	0.0308071
	sp|P43686|PRS6B_HUMAN	PSMC4	26S proteasome regulatory subunit 6B OS=Homo sapiens OX=9606 GN=PSMC4 PE=1 SV=2	612	14	6.29614	6.68307	6.4581	6.68258	0.0860434	-0.0494005	0.0366429	0.0492947	0.0859376
	sp|O75494|SRS10_HUMAN	SRSF10	Serine/arginine-rich splicing factor 10 OS=Homo sapiens OX=9606 GN=SRSF10 PE=1 SV=1	5600	3	1.64696	1.74817	1.48725	1.70705	0.0860401	-0.233192	-0.147152	0.198859	0.0517069
	sp|Q9NS69|TOM22_HUMAN	TOMM22	Mitochondrial import receptor subunit TOM22 homolog OS=Homo sapiens OX=9606 GN=TOMM22 PE=1 SV=3	6393	6	4.89249	5.19271	4.90348	5.07147	0.0859207	-0.0826831	0.00323758	0.0485999	0.0518375
	tr|A0A087X2I1|A0A087X2I1_HUMAN	PSMC6	26S proteasome regulatory subunit 10B OS=Homo sapiens OX=9606 GN=PSMC6 PE=1 SV=1	721	15	6.65331	7.06128	6.75964	7.11261	0.0858574	-0.0629836	0.0228738	0.0734313	0.0963051
	sp|Q8NBX0|SCPDL_HUMAN	SCCPDH	Saccharopine dehydrogenase-like oxidoreductase OS=Homo sapiens OX=9606 GN=SCCPDH PE=1 SV=1	606	11	6.26498	6.64889	6.83397	7.26974	0.0858037	0.0396118	0.125415	0.0891791	0.214595
	sp|O95456|PSMG1_HUMAN	PSMG1	Proteasome assembly chaperone 1 OS=Homo sapiens OX=9606 GN=PSMG1 PE=1 SV=1	1480	2	6.26782	6.65154	7.17624	6.36322	0.0857261	0.109539	0.195265	-0.173473	0.0217929
	sp|Q9UHY1|NRBP_HUMAN	NRBP1	Nuclear receptor-binding protein OS=Homo sapiens OX=9606 GN=NRBP1 PE=1 SV=1	3316	9	6.68202	7.09047	7.1513	6.93112	0.0855956	0.0123246	0.0979202	-0.0451157	0.0528045
	sp|P62750|RL23A_HUMAN	RPL23A	60S ribosomal protein L23a OS=Homo sapiens OX=9606 GN=RPL23A PE=1 SV=1	4481	6	6.3269	6.71308	6.42593	7.53996	0.0854746	-0.0630677	0.0224068	0.23065	0.253057
	tr|Q5LJA9|Q5LJA9_HUMAN	UCHL5	Ubiquitin carboxyl-terminal hydrolase (Fragment) OS=Homo sapiens OX=9606 GN=UCHL5 PE=1 SV=1	4602	14	6.32974	6.71543	6.55326	6.30521	0.085335	-0.0352685	0.0500666	-0.0556676	-0.00560106
	sp|P62136-2|PP1A_HUMAN	PPP1CA	Isoform 2 of Serine/threonine-protein phosphatase PP1-alpha catalytic subunit OS=Homo sapiens OX=9606 GN=PPP1CA	1554	11	6.9596	7.38256	7.01913	7.29113	0.0851174	-0.0728299	0.0122875	0.0548515	0.067139
	sp|O75521|ECI2_HUMAN	ECI2	Enoyl-CoA delta isomerase 2, mitochondrial OS=Homo sapiens OX=9606 GN=ECI2 PE=1 SV=4	3714	9	6.35602	6.74198	6.3043	6.26783	0.0850479	-0.0968365	-0.0117886	-0.00836861	-0.0201572
	sp|Q5T0F9|C2D1B_HUMAN	CC2D1B	Coiled-coil and C2 domain-containing protein 1B OS=Homo sapiens OX=9606 GN=CC2D1B PE=1 SV=1	5269	5	6.88045	7.29824	6.90666	6.31775	0.0850456	-0.0795607	0.00548493	-0.128579	-0.123094
	sp|Q92611|EDEM1_HUMAN	EDEM1	ER degradation-enhancing alpha-mannosidase-like protein 1 OS=Homo sapiens OX=9606 GN=EDEM1 PE=1 SV=1	6343	2	7.06928	7.49831	7.24031	6.42767	0.0850022	-0.0505137	0.0344885	-0.171755	-0.137266
	sp|Q9NWH9|SLTM_HUMAN	SLTM	SAFB-like transcription modulator OS=Homo sapiens OX=9606 GN=SLTM PE=1 SV=2	3499	8	6.64143	7.04437	6.1968	6.1696	0.0849761	-0.184947	-0.0999712	-0.00634645	-0.106318
	sp|O75534-4|CSDE1_HUMAN	CSDE1	Isoform 4 of Cold shock domain-containing protein E1 OS=Homo sapiens OX=9606 GN=CSDE1	2787	29	6.54177	6.93776	6.58338	6.83409	0.0847896	-0.0756414	0.00914817	0.0539211	0.0630693
	sp|Q9BSC4|NOL10_HUMAN	NOL10	Nucleolar protein 10 OS=Homo sapiens OX=9606 GN=NOL10 PE=1 SV=1	3091	6	6.84961	7.26343	6.03215	6.33932	0.0846292	-0.267978	-0.183349	0.0716551	-0.111694
	sp|P50991|TCPD_HUMAN	CCT4	T-complex protein 1 subunit delta OS=Homo sapiens OX=9606 GN=CCT4 PE=1 SV=4	1120	17	6.60001	6.99801	6.67866	6.85728	0.0844772	-0.067386	0.0170912	0.038077	0.0551682
	sp|P19338|NUCL_HUMAN	NCL	Nucleolin OS=Homo sapiens OX=9606 GN=NCL PE=1 SV=3	71	23	4.41562	4.67967	3.98811	4.2262	0.0837929	-0.230703	-0.14691	0.0836564	-0.0632539
	tr|G3V1S3|G3V1S3_HUMAN	DENND5B	DENN domain-containing protein 5B OS=Homo sapiens OX=9606 GN=DENND5B PE=1 SV=1	2609	3	6.67025	7.06892	7.30983	7.46177	0.0837504	0.0483464	0.132097	0.029681	0.161778
	tr|H3BNC9|H3BNC9_HUMAN		Uncharacterized protein OS=Homo sapiens OX=9606 PE=3 SV=2	4130	8	6.94501	7.36008	6.45039	6.63194	0.083744	-0.190334	-0.10659	0.0400457	-0.0665447
	sp|Q9H0C2|ADT4_HUMAN	SLC25A31	ADP/ATP translocase 4 OS=Homo sapiens OX=9606 GN=SLC25A31 PE=2 SV=1	557	6	6.766	7.16943	6.79079	6.91947	0.0835559	-0.0782797	0.00527624	0.0270821	0.0323584
	sp|P61081|UBC12_HUMAN	UBE2M	NEDD8-conjugating enzyme Ubc12 OS=Homo sapiens OX=9606 GN=UBE2M PE=1 SV=1	3914	7	6.36505	6.74428	6.20316	6.21261	0.0834918	-0.120661	-0.0371697	0.00219654	-0.0349731
	sp|Q9NRX4|PHP14_HUMAN	PHPT1	14 kDa phosphohistidine phosphatase OS=Homo sapiens OX=9606 GN=PHPT1 PE=1 SV=1	5987	11	5.86784	6.21736	6.29874	7.00757	0.0834726	0.0187627	0.102235	0.15385	0.256086
	sp|O43808|PM34_HUMAN	SLC25A17	Peroxisomal membrane protein PMP34 OS=Homo sapiens OX=9606 GN=SLC25A17 PE=1 SV=1	4616	3	7.17534	7.60271	7.63239	4.93576	0.0834672	0.0056205	0.0890877	-0.628863	-0.539775
	sp|Q04941|PLP2_HUMAN	PLP2	Proteolipid protein 2 OS=Homo sapiens OX=9606 GN=PLP2 PE=1 SV=1	5904	2	6.95502	7.36884	6.87111	7.90087	0.0833815	-0.100893	-0.0175111	0.201468	0.183957
	sp|O43175|SERA_HUMAN	PHGDH	D-3-phosphoglycerate dehydrogenase OS=Homo sapiens OX=9606 GN=PHGDH PE=1 SV=4	1483	18	5.85924	6.20767	6.04461	7.71568	0.0833375	-0.0384006	0.0449369	0.352142	0.397079
	sp|O00400|ACATN_HUMAN	SLC33A1	Acetyl-coenzyme A transporter 1 OS=Homo sapiens OX=9606 GN=SLC33A1 PE=1 SV=1	4966	2	7.19381	7.62142	6.90605	7.05899	0.0833025	-0.142197	-0.0588949	0.0316	-0.0272949
	sp|Q9BVQ7|SPA5L_HUMAN	SPATA5L1	Spermatogenesis-associated protein 5-like protein 1 OS=Homo sapiens OX=9606 GN=SPATA5L1 PE=1 SV=2	2118	8	6.58885	6.98035	6.412	5.84825	0.0832727	-0.122525	-0.0392523	-0.132769	-0.172021
	sp|P53370|NUDT6_HUMAN	NUDT6	Nucleoside diphosphate-linked moiety X motif 6 OS=Homo sapiens OX=9606 GN=NUDT6 PE=1 SV=2	5161	2	6.74035	7.14078	7.23436	7.47522	0.0832575	0.0187831	0.102041	0.0472513	0.149292
	sp|Q5VSL9|STRP1_HUMAN	STRIP1	Striatin-interacting protein 1 OS=Homo sapiens OX=9606 GN=STRIP1 PE=1 SV=1	31	12	7.04472	7.46306	6.87961	7.01515	0.0832249	-0.11744	-0.0342149	0.0281465	-0.00606841
	sp|P22694-2|KAPCB_HUMAN	PRKACB	Isoform 2 of cAMP-dependent protein kinase catalytic subunit beta OS=Homo sapiens OX=9606 GN=PRKACB	2747	8	6.00789	6.36442	6.79242	5.67562	0.0831706	0.0938966	0.177067	-0.259148	-0.0820804
	sp|Q9UHK0|NUFP1_HUMAN	NUFIP1	Nuclear fragile X mental retardation-interacting protein 1 OS=Homo sapiens OX=9606 GN=NUFIP1 PE=1 SV=2	4399	2	7.19219	7.61839	7.32497	5.80921	0.0830563	-0.0566636	0.0263927	-0.334482	-0.30809
	sp|Q9NRY4|RHG35_HUMAN	ARHGAP35	Rho GTPase-activating protein 35 OS=Homo sapiens OX=9606 GN=ARHGAP35 PE=1 SV=3	629	9	6.7013	7.0982	6.306	6.40587	0.0830123	-0.170727	-0.0877143	0.0226675	-0.0650469
	sp|Q9Y520-7|PRC2C_HUMAN	PRRC2C	Isoform 7 of Protein PRRC2C OS=Homo sapiens OX=9606 GN=PRRC2C	241	18	6.97905	7.39219	6.5746	7.12927	0.0829711	-0.169098	-0.0861271	0.116849	0.030722
	sp|Q9BTM9-2|URM1_HUMAN	URM1	Isoform 2 of Ubiquitin-related modifier 1 OS=Homo sapiens OX=9606 GN=URM1	5067	2	7.34623	7.78002	6.59899	7.51367	0.0827705	-0.237529	-0.154758	0.187273	0.0325143
	tr|E7EVA0|E7EVA0_HUMAN	MAP4	Microtubule-associated protein OS=Homo sapiens OX=9606 GN=MAP4 PE=1 SV=1	2049	33	6.49378	6.87652	6.23275	7.96805	0.0826209	-0.141809	-0.0591885	0.354357	0.295168
	sp|Q96AT9|RPE_HUMAN	RPE	Ribulose-phosphate 3-epimerase OS=Homo sapiens OX=9606 GN=RPE PE=1 SV=1	5391	7	6.66348	7.05595	7.08405	6.94297	0.0825638	0.00573338	0.0882972	-0.0290208	0.0592764
	sp|Q16774-2|KGUA_HUMAN	GUK1	Isoform 2 of Guanylate kinase OS=Homo sapiens OX=9606 GN=GUK1	3868	7	5.73621	6.07336	6.08513	6.10656	0.0823971	0.00279478	0.0851919	0.00507102	0.0902629
	sp|Q9H7Z7|PGES2_HUMAN	PTGES2	Prostaglandin E synthase 2 OS=Homo sapiens OX=9606 GN=PTGES2 PE=1 SV=1	1193	8	6.63988	7.02937	6.90654	6.3507	0.082239	-0.0254333	0.0568056	-0.121046	-0.0642408
	sp|P17081|RHOQ_HUMAN	RHOQ	Rho-related GTP-binding protein RhoQ OS=Homo sapiens OX=9606 GN=RHOQ PE=1 SV=2	2530	2	5.47595	5.79708	6.28081	6.79619	0.0822171	0.115623	0.19784	0.113777	0.311617
	sp|P17302|CXA1_HUMAN	GJA1	Gap junction alpha-1 protein OS=Homo sapiens OX=9606 GN=GJA1 PE=1 SV=2	3349	8	5.65529	5.98656	7.35375	10.476	0.0821279	0.296752	0.37888	0.510531	0.889411
	sp|P14868|SYDC_HUMAN	DARS	Aspartate--tRNA ligase, cytoplasmic OS=Homo sapiens OX=9606 GN=DARS PE=1 SV=2	688	25	6.52655	6.90885	6.59361	6.07259	0.082125	-0.0673777	0.0147472	-0.118757	-0.104009
	sp|O60701|UGDH_HUMAN	UGDH	UDP-glucose 6-dehydrogenase OS=Homo sapiens OX=9606 GN=UGDH PE=1 SV=1	2715	19	6.3757	6.74773	6.87771	6.94482	0.0818178	0.0275274	0.109345	0.0140083	0.123354
	sp|Q66K74|MAP1S_HUMAN	MAP1S	Microtubule-associated protein 1S OS=Homo sapiens OX=9606 GN=MAP1S PE=1 SV=2	464	12	6.93612	7.34061	7.21713	6.9335	0.0817718	-0.0244737	0.0572981	-0.0578424	-0.000544363
	tr|E7EQZ4|E7EQZ4_HUMAN	SMN1	Survival motor neuron protein OS=Homo sapiens OX=9606 GN=SMN1 PE=1 SV=1	5811	3	6.74061	7.13265	7.34586	7.15254	0.0815604	0.0424925	0.124053	-0.0384767	0.0855762
	sp|P15260|INGR1_HUMAN	IFNGR1	Interferon gamma receptor 1 OS=Homo sapiens OX=9606 GN=IFNGR1 PE=1 SV=1	2436	2	7.6679	8.11388	6.70496	6.21243	0.0815598	-0.275163	-0.193603	-0.110072	-0.303674
	sp|Q96S59|RANB9_HUMAN	RANBP9	Ran-binding protein 9 OS=Homo sapiens OX=9606 GN=RANBP9 PE=1 SV=1	1553	7	6.68792	7.07679	6.7311	7.27144	0.0815376	-0.0722518	0.00928578	0.111399	0.120685
	sp|Q96SZ6|CK5P1_HUMAN	CDK5RAP1	CDK5 regulatory subunit-associated protein 1 OS=Homo sapiens OX=9606 GN=CDK5RAP1 PE=1 SV=2	3744	5	6.25973	6.6236	6.05463	5.41533	0.0815158	-0.129577	-0.0480616	-0.16099	-0.209051
	sp|Q96EY1|DNJA3_HUMAN	DNAJA3	DnaJ homolog subfamily A member 3, mitochondrial OS=Homo sapiens OX=9606 GN=DNAJA3 PE=1 SV=2	2489	9	7.2427	7.6637	6.97409	6.71812	0.0815128	-0.136035	-0.0545226	-0.0539481	-0.108471
	sp|P17152|TMM11_HUMAN	TMEM11	Transmembrane protein 11, mitochondrial OS=Homo sapiens OX=9606 GN=TMEM11 PE=1 SV=1	5978	3	6.29633	6.66225	7.05715	6.69453	0.0814983	0.0830762	0.164575	-0.0761029	0.0884716
	sp|Q9H078-2|CLPB_HUMAN	CLPB	Isoform 2 of Caseinolytic peptidase B protein homolog OS=Homo sapiens OX=9606 GN=CLPB	4894	11	6.68842	7.07691	6.94227	5.64387	0.0814548	-0.0277135	0.0537413	-0.298722	-0.244981
	sp|P62714|PP2AB_HUMAN	PPP2CB	Serine/threonine-protein phosphatase 2A catalytic subunit beta isoform OS=Homo sapiens OX=9606 GN=PPP2CB PE=1 SV=1	1552	14	6.99086	7.39641	7.11683	7.0686	0.0813539	-0.0555888	0.0257652	-0.00981128	0.0159539
	sp|Q7Z5L9|I2BP2_HUMAN	IRF2BP2	Interferon regulatory factor 2-binding protein 2 OS=Homo sapiens OX=9606 GN=IRF2BP2 PE=1 SV=2	62	4	2.32751	2.4625	2.58176	2.00116	0.0813365	0.0682359	0.149572	-0.367518	-0.217945
	sp|P49841-2|GSK3B_HUMAN	GSK3B	Isoform 2 of Glycogen synthase kinase-3 beta OS=Homo sapiens OX=9606 GN=GSK3B	3902	7	5.46855	5.78546	5.32959	5.14567	0.081275	-0.118408	-0.0371334	-0.0506666	-0.0877999
	sp|Q96C92|ENTR1_HUMAN	ENTR1	Endosome-associated-trafficking regulator 1 OS=Homo sapiens OX=9606 GN=ENTR1 PE=1 SV=3	3230	2	5.96191	6.30716	5.99865	5.46277	0.0812167	-0.0723542	0.00886246	-0.135004	-0.126142
	sp|Q9HCE1|MOV10_HUMAN	MOV10	Helicase MOV-10 OS=Homo sapiens OX=9606 GN=MOV10 PE=1 SV=2	1865	9	5.74577	6.07788	5.4393	4.95248	0.0810679	-0.160147	-0.0790792	-0.135268	-0.214348
	sp|Q15750|TAB1_HUMAN	TAB1	TGF-beta-activated kinase 1 and MAP3K7-binding protein 1 OS=Homo sapiens OX=9606 GN=TAB1 PE=1 SV=1	6414	7	6.12246	6.47599	6.20434	6.32826	0.0809886	-0.0618219	0.0191667	0.0285296	0.0476963
	sp|Q14232|EI2BA_HUMAN	EIF2B1	Translation initiation factor eIF-2B subunit alpha OS=Homo sapiens OX=9606 GN=EIF2B1 PE=1 SV=1	3772	8	6.82788	7.22162	6.99197	6.73712	0.0808848	-0.0466228	0.034262	-0.053567	-0.019305
	sp|Q6UWP7|LCLT1_HUMAN	LCLAT1	Lysocardiolipin acyltransferase 1 OS=Homo sapiens OX=9606 GN=LCLAT1 PE=1 SV=1	4572	4	5.7988	6.13316	6.1291	5.27665	0.080877	-0.000956913	0.0799201	-0.216054	-0.136133
	sp|P84098|RL19_HUMAN	RPL19	60S ribosomal protein L19 OS=Homo sapiens OX=9606 GN=RPL19 PE=1 SV=1	6027	3	6.59628	6.97595	6.38187	6.7034	0.0807356	-0.128411	-0.0476749	0.0709146	0.0232397
	sp|A0JNW5|UH1BL_HUMAN	UHRF1BP1L	UHRF1-binding protein 1-like OS=Homo sapiens OX=9606 GN=UHRF1BP1L PE=1 SV=2	5489	5	6.60474	6.98414	6.44949	6.70937	0.0805814	-0.114898	-0.0343167	0.0569919	0.0226752
	sp|Q8IXK0-5|PHC2_HUMAN	PHC2	Isoform 5 of Polyhomeotic-like protein 2 OS=Homo sapiens OX=9606 GN=PHC2	2643	4	7.16428	7.57539	6.95572	7.02331	0.0804984	-0.12312	-0.0426218	0.0139506	-0.0286713
	sp|O00629|IMA3_HUMAN	KPNA4	Importin subunit alpha-3 OS=Homo sapiens OX=9606 GN=KPNA4 PE=1 SV=1	2899	6	6.63036	7.01012	6.62263	7.46407	0.0803519	-0.0820345	-0.00168258	0.172558	0.170876
	sp|O60291-2|MGRN1_HUMAN	MGRN1	Isoform 2 of E3 ubiquitin-protein ligase MGRN1 OS=Homo sapiens OX=9606 GN=MGRN1	5108	4	6.40367	6.76918	6.61171	6.58264	0.0800814	-0.0339569	0.0461245	-0.00635787	0.0397666
	sp|P35625|TIMP3_HUMAN	TIMP3	Metalloproteinase inhibitor 3 OS=Homo sapiens OX=9606 GN=TIMP3 PE=1 SV=2	4742	6	8.50657	8.99127	5.26422	6.39853	0.0799474	-0.772305	-0.692357	0.281521	-0.410836
	sp|Q9NUP9|LIN7C_HUMAN	LIN7C	Protein lin-7 homolog C OS=Homo sapiens OX=9606 GN=LIN7C PE=1 SV=1	2820	4	4.22196	4.4623	4.55589	5.37589	0.0798724	0.0299465	0.109819	0.238772	0.348591
	sp|Q00059|TFAM_HUMAN	TFAM	Transcription factor A, mitochondrial OS=Homo sapiens OX=9606 GN=TFAM PE=1 SV=1	1115	5	6.19331	6.54527	7.90564	6.59583	0.0797413	0.27243	0.352171	-0.261329	0.0908428
	sp|O60268|K0513_HUMAN	KIAA0513	Uncharacterized protein KIAA0513 OS=Homo sapiens OX=9606 GN=KIAA0513 PE=1 SV=1	3004	3	5.86996	6.20307	7.45913	7.86347	0.0796326	0.266025	0.345657	0.076159	0.421816
	sp|O95373|IPO7_HUMAN	IPO7	Importin-7 OS=Homo sapiens OX=9606 GN=IPO7 PE=1 SV=1	645	21	6.63857	7.01527	6.41434	6.86204	0.0796247	-0.129196	-0.0495717	0.0973349	0.0477633
	tr|H3BN98|H3BN98_HUMAN		Uncharacterized protein (Fragment) OS=Homo sapiens OX=9606 PE=4 SV=2	3236	5	6.47345	6.84047	6.68732	6.65584	0.0795606	-0.032668	0.0468926	-0.0068074	0.0400852
	sp|Q13200|PSMD2_HUMAN	PSMD2	26S proteasome non-ATPase regulatory subunit 2 OS=Homo sapiens OX=9606 GN=PSMD2 PE=1 SV=3	985	26	6.63432	7.01004	6.59486	7.05029	0.0794741	-0.0880803	-0.0086062	0.0963392	0.087733
	sp|Q9NX05|F120C_HUMAN	FAM120C	Constitutive coactivator of PPAR-gamma-like protein 2 OS=Homo sapiens OX=9606 GN=FAM120C PE=1 SV=3	1551	5	7.19719	7.60472	6.37068	7.91486	0.0794613	-0.255448	-0.175987	0.313116	0.137129
	sp|Q12767-2|TMM94_HUMAN	TMEM94	Isoform 2 of Transmembrane protein 94 OS=Homo sapiens OX=9606 GN=TMEM94	5664	2	6.48957	6.85609	7.32969	7.99242	0.0792631	0.0963661	0.175629	0.124879	0.300508
	sp|Q03701|CEBPZ_HUMAN	CEBPZ	CCAAT/enhancer-binding protein zeta OS=Homo sapiens OX=9606 GN=CEBPZ PE=1 SV=3	2014	10	7.02799	7.42458	6.35406	6.4935	0.0791966	-0.22463	-0.145433	0.0313153	-0.114118
	sp|O95363|SYFM_HUMAN	FARS2	Phenylalanine--tRNA ligase, mitochondrial OS=Homo sapiens OX=9606 GN=FARS2 PE=1 SV=1	3784	3	6.56567	6.93603	6.75625	6.30225	0.0791665	-0.037886	0.0412805	-0.100355	-0.0590748
	sp|Q5JU85|IQEC2_HUMAN	IQSEC2	IQ motif and SEC7 domain-containing protein 2 OS=Homo sapiens OX=9606 GN=IQSEC2 PE=1 SV=2	5088	2	6.49905	6.86466	7.5166	7.40463	0.0789602	0.130892	0.209852	-0.0216519	0.188201
	sp|P61758|PFD3_HUMAN	VBP1	Prefoldin subunit 3 OS=Homo sapiens OX=9606 GN=VBP1 PE=1 SV=4	2717	11	6.65818	7.0319	7.03878	6.70627	0.0787867	0.00140982	0.0801965	-0.0698127	0.0103838
	sp|Q9BXR0|TGT_HUMAN	QTRT1	Queuine tRNA-ribosyltransferase catalytic subunit 1 OS=Homo sapiens OX=9606 GN=QTRT1 PE=1 SV=3	2734	7	5.32395	5.62252	5.45343	5.54921	0.0787198	-0.0440538	0.034666	0.0251185	0.0597845
	sp|O60664|PLIN3_HUMAN	PLIN3	Perilipin-3 OS=Homo sapiens OX=9606 GN=PLIN3 PE=1 SV=3	3873	19	5.5718	5.88349	5.24984	6.19963	0.0785288	-0.164397	-0.0858682	0.239908	0.15404
	sp|Q15437|SC23B_HUMAN	SEC23B	Protein transport protein Sec23B OS=Homo sapiens OX=9606 GN=SEC23B PE=1 SV=2	497	8	7.08136	7.47549	6.57823	6.37728	0.0781423	-0.18447	-0.106328	-0.0447586	-0.151086
	tr|B1AKJ5|B1AKJ5_HUMAN	NRDC	Nardilysin OS=Homo sapiens OX=9606 GN=NRDC PE=1 SV=1	1137	11	5.78262	6.10339	5.55731	5.81421	0.0778859	-0.135223	-0.057337	0.0651973	0.00786029
	sp|Q15642|CIP4_HUMAN	TRIP10	Cdc42-interacting protein 4 OS=Homo sapiens OX=9606 GN=TRIP10 PE=1 SV=3	2544	13	4.15614	4.3866	4.16356	4.465	0.0778577	-0.0752844	0.00257336	0.100843	0.103416
	sp|P53367|ARFP1_HUMAN	ARFIP1	Arfaptin-1 OS=Homo sapiens OX=9606 GN=ARFIP1 PE=1 SV=2	3547	10	5.18402	5.47061	5.61296	5.35949	0.0776313	0.0370579	0.114689	-0.0666661	0.0480231
	sp|Q7L2J0|MEPCE_HUMAN	MEPCE	7SK snRNA methylphosphate capping enzyme OS=Homo sapiens OX=9606 GN=MEPCE PE=1 SV=1	3128	4	7.36546	7.77195	6.75541	7.02765	0.0775004	-0.202232	-0.124732	0.0569993	-0.0677323
	sp|Q9UDW1|QCR9_HUMAN	UQCR10	Cytochrome b-c1 complex subunit 9 OS=Homo sapiens OX=9606 GN=UQCR10 PE=1 SV=3	1141	2	6.71573	7.08605	7.25442	7.53408	0.0774375	0.0338783	0.111316	0.0545721	0.165888
	sp|Q8WXA3-1|RUFY2_HUMAN	RUFY2	Isoform 5 of RUN and FYVE domain-containing protein 2 OS=Homo sapiens OX=9606 GN=RUFY2	30	13	6.64777	7.01409	6.6799	6.746	0.0773848	-0.0704291	0.00695567	0.0142055	0.0211611
	tr|A0A1W2PS05|A0A1W2PS05_HUMAN	PIK3C3	Phosphatidylinositol 3-kinase catalytic subunit type 3 OS=Homo sapiens OX=9606 GN=PIK3C3 PE=1 SV=1	2974	11	6.49126	6.84875	6.56974	6.36583	0.0773414	-0.0600041	0.0173374	-0.0454891	-0.0281518
	tr|B4DLN1|B4DLN1_HUMAN		cDNA FLJ60124, highly similar to Mitochondrial dicarboxylate carrier OS=Homo sapiens OX=9606 PE=2 SV=1	300	5	6.46453	6.8203	7.4944	6.1319	0.0772897	0.135977	0.213267	-0.289478	-0.0762109
	sp|Q9UKM7|MA1B1_HUMAN	MAN1B1	Endoplasmic reticulum mannosyl-oligosaccharide 1,2-alpha-mannosidase OS=Homo sapiens OX=9606 GN=MAN1B1 PE=1 SV=2	4327	12	5.38184	5.67779	5.71044	5.28517	0.0772309	0.00827116	0.085502	-0.111651	-0.0261487
	sp|Q8TER5|ARH40_HUMAN	ARHGEF40	Rho guanine nucleotide exchange factor 40 OS=Homo sapiens OX=9606 GN=ARHGEF40 PE=1 SV=3	1902	6	5.91471	6.23799	7.18438	7.35331	0.0767722	0.203784	0.280556	0.0335298	0.314086
	sp|Q9NWR8|MCUB_HUMAN	MCUB	Calcium uniporter regulatory subunit MCUb, mitochondrial OS=Homo sapiens OX=9606 GN=MCUB PE=1 SV=2	5870	2	5.20027	5.48445	6.65233	6.64199	0.0767605	0.278514	0.355275	-0.00224491	0.35303
	sp|P35268|RL22_HUMAN	RPL22	60S ribosomal protein L22 OS=Homo sapiens OX=9606 GN=RPL22 PE=1 SV=2	1439	5	7.1988	7.58991	6.59768	6.68569	0.076325	-0.202123	-0.125798	0.0191166	-0.106682
	sp|Q8N2F6|ARM10_HUMAN	ARMC10	Armadillo repeat-containing protein 10 OS=Homo sapiens OX=9606 GN=ARMC10 PE=1 SV=1	1944	6	5.86369	6.18215	6.48311	5.7494	0.0762998	0.068577	0.144877	-0.173274	-0.028397
	sp|Q9UNZ2-5|NSF1C_HUMAN	NSFL1C	Isoform 3 of NSFL1 cofactor p47 OS=Homo sapiens OX=9606 GN=NSFL1C	2690	12	6.15882	6.49328	6.45681	6.49432	0.0762927	-0.00812473	0.0681679	0.00835689	0.0765248
	sp|Q8WZA1-2|PMGT1_HUMAN	POMGNT1	Isoform 2 of Protein O-linked-mannose beta-1,2-N-acetylglucosaminyltransferase 1 OS=Homo sapiens OX=9606 GN=POMGNT1	5409	5	5.86515	6.18358	5.4722	5.15347	0.0762759	-0.176323	-0.100047	-0.0865773	-0.186624
	sp|Q8N8R5|CB069_HUMAN	C2orf69	UPF0565 protein C2orf69 OS=Homo sapiens OX=9606 GN=C2orf69 PE=1 SV=1	5445	4	6.79731	7.16578	7.194	7.10187	0.0761591	0.00567041	0.0818295	-0.0185942	0.0632353
	sp|Q9UPQ9|TNR6B_HUMAN	TNRC6B	Trinucleotide repeat-containing gene 6B protein OS=Homo sapiens OX=9606 GN=TNRC6B PE=1 SV=4	3672	14	6.91861	7.29342	6.86046	6.62957	0.0761133	-0.0882892	-0.0121759	-0.0493904	-0.0615662
	sp|P30050|RL12_HUMAN	RPL12	60S ribosomal protein L12 OS=Homo sapiens OX=9606 GN=RPL12 PE=1 SV=1	3444	11	5.67796	5.98543	5.26933	5.34356	0.0760814	-0.183835	-0.107754	0.0201826	-0.0875715
	sp|Q8IZQ5|SELH_HUMAN	SELENOH	Selenoprotein H OS=Homo sapiens OX=9606 GN=SELENOH PE=1 SV=2	834	2	6.38874	6.73391	5.46653	5.91301	0.0759123	-0.30082	-0.224908	0.113267	-0.111641
	tr|A0A0J9YX62|A0A0J9YX62_HUMAN	DNAJB6	DnaJ homolog subfamily B member 6 OS=Homo sapiens OX=9606 GN=DNAJB6 PE=1 SV=1	4434	3	5.927	6.24523	6.49308	6.90843	0.0754534	0.0561475	0.131601	0.0894549	0.221056
	sp|P51687|SUOX_HUMAN	SUOX	Sulfite oxidase, mitochondrial OS=Homo sapiens OX=9606 GN=SUOX PE=1 SV=2	2187	5	5.29723	5.58144	6.28271	3.65483	0.075401	0.17075	0.246151	-0.781581	-0.535431
	sp|Q9H6R4|NOL6_HUMAN	NOL6	Nucleolar protein 6 OS=Homo sapiens OX=9606 GN=NOL6 PE=1 SV=2	669	6	7.41941	7.81672	6.79539	6.75964	0.0752602	-0.202008	-0.126748	-0.00760958	-0.134357
	tr|A0A2R8Y7R8|A0A2R8Y7R8_HUMAN	RNASEH2B	Ribonuclease H2 subunit B OS=Homo sapiens OX=9606 GN=RNASEH2B PE=1 SV=1	4918	4	6.13376	6.46185	7.34711	7.06707	0.0751755	0.18523	0.260405	-0.0560637	0.204342
	sp|Q9NP79|VTA1_HUMAN	VTA1	Vacuolar protein sorting-associated protein VTA1 homolog OS=Homo sapiens OX=9606 GN=VTA1 PE=1 SV=1	4171	10	6.77937	7.14188	7.11062	7.02543	0.0751527	-0.00632752	0.0688252	-0.0173898	0.0514353
	sp|Q9UBB4|ATX10_HUMAN	ATXN10	Ataxin-10 OS=Homo sapiens OX=9606 GN=ATXN10 PE=1 SV=1	2117	8	6.85613	7.22256	6.70582	6.83442	0.0751152	-0.107095	-0.03198	0.0274044	-0.00457556
	sp|O75828|CBR3_HUMAN	CBR3	Carbonyl reductase [NADPH] 3 OS=Homo sapiens OX=9606 GN=CBR3 PE=1 SV=3	1152	9	5.51184	5.80544	7.19583	6.80674	0.0748706	0.309756	0.384626	-0.0801954	0.304431
	sp|P25398|RS12_HUMAN	RPS12	40S ribosomal protein S12 OS=Homo sapiens OX=9606 GN=RPS12 PE=1 SV=3	4338	11	6.4834	6.82816	6.10522	6.4223	0.0747448	-0.161454	-0.0867088	0.0730476	-0.0136613
	sp|Q15018|ABRX2_HUMAN	ABRAXAS2	BRISC complex subunit Abraxas 2 OS=Homo sapiens OX=9606 GN=ABRAXAS2 PE=1 SV=2	1740	9	6.20255	6.53126	6.78268	6.3331	0.0744998	0.054493	0.128993	-0.0989421	0.0300508
	sp|P20336|RAB3A_HUMAN	RAB3A	Ras-related protein Rab-3A OS=Homo sapiens OX=9606 GN=RAB3A PE=1 SV=1	4214	2	7.28625	7.66963	7.04211	6.43988	0.0739805	-0.123149	-0.0491688	-0.128974	-0.178143
	sp|Q86XL3|ANKL2_HUMAN	ANKLE2	Ankyrin repeat and LEM domain-containing protein 2 OS=Homo sapiens OX=9606 GN=ANKLE2 PE=1 SV=4	3720	5	6.87694	7.23734	7.44313	6.49918	0.0736928	0.0404502	0.114143	-0.195652	-0.0815091
	sp|Q96I99|SUCB2_HUMAN	SUCLG2	Succinate--CoA ligase [GDP-forming] subunit beta, mitochondrial OS=Homo sapiens OX=9606 GN=SUCLG2 PE=1 SV=2	1961	17	6.34091	6.673	6.8462	6.16017	0.0736463	0.0369679	0.110614	-0.152334	-0.0417197
	sp|O00562|PITM1_HUMAN	PITPNM1	Membrane-associated phosphatidylinositol transfer protein 1 OS=Homo sapiens OX=9606 GN=PITPNM1 PE=1 SV=4	330	4	6.9008	7.26206	7.13382	7.35426	0.0736159	-0.0257047	0.0479112	0.043907	0.0918182
	sp|O60313-2|OPA1_HUMAN	OPA1	Isoform 2 of Dynamin-like 120 kDa protein, mitochondrial OS=Homo sapiens OX=9606 GN=OPA1	1749	26	6.2386	6.56482	6.71463	6.7785	0.0735324	0.0325514	0.106084	0.0136592	0.119743
	sp|Q99460|PSMD1_HUMAN	PSMD1	26S proteasome non-ATPase regulatory subunit 1 OS=Homo sapiens OX=9606 GN=PSMD1 PE=1 SV=2	515	25	5.58614	5.87769	5.77359	5.95373	0.0733975	-0.0257818	0.0476157	0.0443256	0.0919412
	sp|Q13526|PIN1_HUMAN	PIN1	Peptidyl-prolyl cis-trans isomerase NIMA-interacting 1 OS=Homo sapiens OX=9606 GN=PIN1 PE=1 SV=1	3415	2	6.81492	7.17048	6.68058	7.28438	0.0733729	-0.102096	-0.0287233	0.124832	0.0961088
	sp|Q6ZT12-4|UBR3_HUMAN	UBR3	Isoform 4 of E3 ubiquitin-protein ligase UBR3 OS=Homo sapiens OX=9606 GN=UBR3	3314	4	6.90625	7.26633	7.17633	7.21214	0.0733257	-0.017982	0.0553437	0.00718284	0.0625265
	sp|P05388|RLA0_HUMAN	RPLP0	60S acidic ribosomal protein P0 OS=Homo sapiens OX=9606 GN=RPLP0 PE=1 SV=1	1303	13	5.76947	6.06968	5.51375	5.61616	0.0731808	-0.138587	-0.0654066	0.0265498	-0.0388569
	sp|O60784-2|TOM1_HUMAN	TOM1	Isoform 2 of Target of Myb protein 1 OS=Homo sapiens OX=9606 GN=TOM1	119	9	6.57608	6.91809	7.66271	6.77061	0.0731466	0.14748	0.220627	-0.178569	0.042058
	sp|P12081|SYHC_HUMAN	HARS	Histidine--tRNA ligase, cytoplasmic OS=Homo sapiens OX=9606 GN=HARS PE=1 SV=2	303	12	6.88365	7.24097	7.03035	7.09469	0.0730092	-0.0425881	0.030421	0.0131442	0.0435652
	sp|P31937|3HIDH_HUMAN	HIBADH	3-hydroxyisobutyrate dehydrogenase, mitochondrial OS=Homo sapiens OX=9606 GN=HIBADH PE=1 SV=2	3492	14	5.70399	6.00003	6.14853	6.02304	0.0729983	0.0352726	0.108271	-0.0297509	0.07852
	sp|Q8WUH2|TGFA1_HUMAN	TGFBRAP1	Transforming growth factor-beta receptor-associated protein 1 OS=Homo sapiens OX=9606 GN=TGFBRAP1 PE=1 SV=1	1261	7	6.5516	6.89102	6.26082	5.75811	0.0728688	-0.138365	-0.0654964	-0.120756	-0.186253
	sp|Q9H8H0|NOL11_HUMAN	NOL11	Nucleolar protein 11 OS=Homo sapiens OX=9606 GN=NOL11 PE=1 SV=1	1049	13	3.12636	3.28828	2.87822	3.05757	0.0728492	-0.192155	-0.119306	0.0872102	-0.032096
	sp|P50281|MMP14_HUMAN	MMP14	Matrix metalloproteinase-14 OS=Homo sapiens OX=9606 GN=MMP14 PE=1 SV=3	2853	14	6.58873	6.92982	6.42262	6.83315	0.0728168	-0.109655	-0.0368381	0.0893895	0.0525514
	sp|Q9Y2W1|TR150_HUMAN	THRAP3	Thyroid hormone receptor-associated protein 3 OS=Homo sapiens OX=9606 GN=THRAP3 PE=1 SV=2	923	11	6.91843	7.2764	6.45511	6.62307	0.0727795	-0.172783	-0.100004	0.0370573	-0.0629464
	sp|O60684|IMA7_HUMAN	KPNA6	Importin subunit alpha-7 OS=Homo sapiens OX=9606 GN=KPNA6 PE=1 SV=1	4415	2	6.73695	7.08512	6.65036	6.65461	0.072696	-0.0913584	-0.0186624	0.000919872	-0.0177426
	sp|Q9BUT1|BDH2_HUMAN	BDH2	3-hydroxybutyrate dehydrogenase type 2 OS=Homo sapiens OX=9606 GN=BDH2 PE=1 SV=2	523	9	5.76463	6.0625	7.31296	5.20456	0.0726832	0.270544	0.343228	-0.49068	-0.147453
	sp|Q6P995|F171B_HUMAN	FAM171B	Protein FAM171B OS=Homo sapiens OX=9606 GN=FAM171B PE=2 SV=3	6371	2	6.94976	7.30829	6.65527	8.6471	0.0725694	-0.135035	-0.0624656	0.377718	0.315253
	sp|P38117|ETFB_HUMAN	ETFB	Electron transfer flavoprotein subunit beta OS=Homo sapiens OX=9606 GN=ETFB PE=1 SV=3	5165	15	5.68855	5.98197	6.22588	5.91429	0.0725589	0.0576579	0.130217	-0.0740728	0.056144
	sp|Q5XPI4-2|RN123_HUMAN	RNF123	Isoform 2 of E3 ubiquitin-protein ligase RNF123 OS=Homo sapiens OX=9606 GN=RNF123	608	7	5.08394	5.34607	5.3188	5.22696	0.0725336	-0.00737839	0.0651552	-0.0251277	0.0400274
	tr|G3XA98|G3XA98_HUMAN	FBLN5	Fibulin 5, isoform CRA_a OS=Homo sapiens OX=9606 GN=FBLN5 PE=1 SV=1	3171	2	6.20244	6.52212	7.56766	8.21017	0.0725051	0.214508	0.287013	0.117564	0.404577
	sp|Q96D71|REPS1_HUMAN	REPS1	RalBP1-associated Eps domain-containing protein 1 OS=Homo sapiens OX=9606 GN=REPS1 PE=1 SV=3	5216	9	6.19773	6.51679	6.30397	6.78658	0.0724208	-0.0479012	0.0245196	0.106426	0.130945
	sp|Q8NEC7|GSTCD_HUMAN	GSTCD	Glutathione S-transferase C-terminal domain-containing protein OS=Homo sapiens OX=9606 GN=GSTCD PE=1 SV=2	714	3	6.67553	7.01772	6.81885	6.12078	0.0721214	-0.0414746	0.0306468	-0.155813	-0.125166
	tr|J3QQ67|J3QQ67_HUMAN	RPL18	60S ribosomal protein L18 (Fragment) OS=Homo sapiens OX=9606 GN=RPL18 PE=1 SV=1	2377	4	6.1487	6.4637	5.67702	5.90526	0.0720796	-0.187228	-0.115148	0.0568664	-0.0582821
	sp|P62195|PRS8_HUMAN	PSMC5	26S proteasome regulatory subunit 8 OS=Homo sapiens OX=9606 GN=PSMC5 PE=1 SV=1	612	20	6.2547	6.5751	6.43316	6.59734	0.0720722	-0.0314849	0.0405873	0.0363573	0.0769445
	sp|O95816|BAG2_HUMAN	BAG2	BAG family molecular chaperone regulator 2 OS=Homo sapiens OX=9606 GN=BAG2 PE=1 SV=1	4433	8	6.98863	7.34621	6.67485	6.02469	0.0719912	-0.138264	-0.0662732	-0.147849	-0.214122
	sp|Q92696|PGTA_HUMAN	RABGGTA	Geranylgeranyl transferase type-2 subunit alpha OS=Homo sapiens OX=9606 GN=RABGGTA PE=1 SV=2	780	10	6.42327	6.75171	6.82935	6.75188	0.0719435	0.0164953	0.0884389	-0.0164583	0.0719806
	sp|P13929|ENOB_HUMAN	ENO3	Beta-enolase OS=Homo sapiens OX=9606 GN=ENO3 PE=1 SV=5	539	3	3.82371	4.01908	4.69098	3.83246	0.0718922	0.223025	0.294917	-0.291619	0.00329762
	sp|Q8TDQ7|GNPI2_HUMAN	GNPDA2	Glucosamine-6-phosphate isomerase 2 OS=Homo sapiens OX=9606 GN=GNPDA2 PE=1 SV=1	221	5	5.82488	6.12147	6.89357	6.73418	0.0716498	0.171374	0.243024	-0.0337508	0.209273
	sp|Q53H47|SETMR_HUMAN	SETMAR	Histone-lysine N-methyltransferase SETMAR OS=Homo sapiens OX=9606 GN=SETMAR PE=1 SV=2	1647	4	6.46441	6.79331	7.57561	7.38659	0.0715974	0.157248	0.228845	-0.0364555	0.19239
	sp|Q9H2U2-2|IPYR2_HUMAN	PPA2	Isoform 2 of Inorganic pyrophosphatase 2, mitochondrial OS=Homo sapiens OX=9606 GN=PPA2	1719	13	6.04421	6.35147	6.85035	5.9207	0.0715375	0.109087	0.180624	-0.210409	-0.0297848
	sp|Q13409-2|DC1I2_HUMAN	DYNC1I2	Isoform 2B of Cytoplasmic dynein 1 intermediate chain 2 OS=Homo sapiens OX=9606 GN=DYNC1I2	651	17	5.94214	6.24417	6.19166	7.09435	0.0715288	-0.0121836	0.0593452	0.196342	0.255688
	sp|P61981|1433G_HUMAN	YWHAG	14-3-3 protein gamma OS=Homo sapiens OX=9606 GN=YWHAG PE=1 SV=2	177	13	6.57611	6.90998	6.871	7.0596	0.0714464	-0.00816215	0.0632842	0.0390671	0.102351
	sp|O95707|RPP29_HUMAN	POP4	Ribonuclease P protein subunit p29 OS=Homo sapiens OX=9606 GN=POP4 PE=1 SV=2	3020	2	6.91914	7.2704	6.36271	5.89819	0.0714413	-0.192392	-0.120951	-0.109369	-0.23032
	sp|Q9Y3F4-2|STRAP_HUMAN	STRAP	Isoform 2 of Serine-threonine kinase receptor-associated protein OS=Homo sapiens OX=9606 GN=STRAP	468	16	6.51797	6.84884	6.83178	6.74542	0.0714376	-0.0035999	0.0678377	-0.0183522	0.0494856
	sp|P11047|LAMC1_HUMAN	LAMC1	Laminin subunit gamma-1 OS=Homo sapiens OX=9606 GN=LAMC1 PE=1 SV=3	1771	21	5.06994	5.32651	6.99502	7.74415	0.0712228	0.393138	0.46436	0.146779	0.611139
	sp|P39023|RL3_HUMAN	RPL3	60S ribosomal protein L3 OS=Homo sapiens OX=9606 GN=RPL3 PE=1 SV=2	1214	13	5.39406	5.66628	4.93646	5.09299	0.0710286	-0.198923	-0.127894	0.0450346	-0.0828596
	sp|Q96A26|F162A_HUMAN	FAM162A	Protein FAM162A OS=Homo sapiens OX=9606 GN=FAM162A PE=1 SV=2	4545	7	6.34385	6.66374	7.45236	5.61459	0.0709727	0.161365	0.232337	-0.408515	-0.176177
	sp|Q9Y450|HBS1L_HUMAN	HBS1L	HBS1-like protein OS=Homo sapiens OX=9606 GN=HBS1L PE=1 SV=1	2103	18	6.04513	6.34948	6.21953	6.32815	0.0708635	-0.0298325	0.041031	0.0249775	0.0660085
	sp|Q9UNP9-3|PPIE_HUMAN	PPIE	Isoform 3 of Peptidyl-prolyl cis-trans isomerase E OS=Homo sapiens OX=9606 GN=PPIE	875	4	6.60121	6.93346	6.20409	5.98646	0.0708464	-0.160355	-0.089509	-0.0515164	-0.141025
	tr|A0A0G2JH68|A0A0G2JH68_HUMAN	DIAPH1	Protein diaphanous homolog 1 OS=Homo sapiens OX=9606 GN=DIAPH1 PE=1 SV=1	4100	8	5.5409	5.81978	5.79659	7.30842	0.0708443	-0.00576142	0.0650829	0.334355	0.399438
	sp|Q8NBN3|TM87A_HUMAN	TMEM87A	Transmembrane protein 87A OS=Homo sapiens OX=9606 GN=TMEM87A PE=1 SV=3	5078	9	6.13529	6.44394	7.24942	6.68521	0.0708107	0.169924	0.240734	-0.116893	0.123842
	sp|Q9BWH6|RPAP1_HUMAN	RPAP1	RNA polymerase II-associated protein 1 OS=Homo sapiens OX=9606 GN=RPAP1 PE=1 SV=3	1511	4	6.42134	6.74385	6.97806	6.74095	0.0706995	0.0492522	0.119952	-0.0498723	0.0700794
	sp|P27144|KAD4_HUMAN	AK4	Adenylate kinase 4, mitochondrial OS=Homo sapiens OX=9606 GN=AK4 PE=1 SV=1	2701	12	5.63306	5.91565	7.36782	5.2689	0.0706179	0.316701	0.387319	-0.483737	-0.0964176
	sp|P08574|CY1_HUMAN	CYC1	Cytochrome c1, heme protein, mitochondrial OS=Homo sapiens OX=9606 GN=CYC1 PE=1 SV=3	372	6	7.12415	7.48106	7.1232	6.72259	0.0705248	-0.0707165	-0.00019172	-0.083509	-0.0837007
	sp|Q14694-2|UBP10_HUMAN	USP10	Isoform 2 of Ubiquitin carboxyl-terminal hydrolase 10 OS=Homo sapiens OX=9606 GN=USP10	4737	7	7.01875	7.37003	6.15567	6.44398	0.0704557	-0.259755	-0.189299	0.0660376	-0.123262
	sp|O75691|UTP20_HUMAN	UTP20	Small subunit processome component 20 homolog OS=Homo sapiens OX=9606 GN=UTP20 PE=1 SV=3	479	10	6.50777	6.83209	5.45803	5.98934	0.0701637	-0.323949	-0.253785	0.134018	-0.119767
	sp|P49368|TCPG_HUMAN	CCT3	T-complex protein 1 subunit gamma OS=Homo sapiens OX=9606 GN=CCT3 PE=1 SV=4	638	26	6.18342	6.49122	6.29029	6.25812	0.0700847	-0.0453624	0.0247223	-0.00739721	0.0173251
	tr|J3KNF5|J3KNF5_HUMAN	CEP290	Centrosomal protein of 290 kDa OS=Homo sapiens OX=9606 GN=CEP290 PE=1 SV=1	1020	2	7.20479	7.56301	7.09291	6.56958	0.0700054	-0.0925842	-0.0225787	-0.110577	-0.133156
	sp|Q96LW7-2|CAR19_HUMAN	CARD19	Isoform 2 of Caspase recruitment domain-containing protein 19 OS=Homo sapiens OX=9606 GN=CARD19	2168	3	6.66322	6.9929	7.331	7.5228	0.0696713	0.0681198	0.137791	0.0372591	0.17505
	sp|Q8NC60|NOA1_HUMAN	NOA1	Nitric oxide-associated protein 1 OS=Homo sapiens OX=9606 GN=NOA1 PE=1 SV=2	658	7	3.85838	4.04922	3.62372	3.25161	0.0696487	-0.160172	-0.0905237	-0.156321	-0.246844
	sp|Q9BYG3|MK67I_HUMAN	NIFK	MKI67 FHA domain-interacting nucleolar phosphoprotein OS=Homo sapiens OX=9606 GN=NIFK PE=1 SV=1	4385	3	5.93157	6.2244	5.14388	5.41837	0.0695215	-0.275079	-0.205557	0.0750024	-0.130555
	tr|A6NC48|A6NC48_HUMAN	BST1	ADP-ribosyl cyclase/cyclic ADP-ribose hydrolase 2 OS=Homo sapiens OX=9606 GN=BST1 PE=1 SV=1	2002	4	7.57595	7.94933	6.72785	6.52855	0.0694059	-0.240688	-0.171282	-0.0433822	-0.214664
	tr|A0A0B4J2E5|A0A0B4J2E5_HUMAN	LOC102724159	Uncharacterized protein OS=Homo sapiens OX=9606 GN=LOC102724159 PE=1 SV=1	751	6	7.60609	7.98019	6.62124	6.75687	0.0692693	-0.269323	-0.200054	0.0292544	-0.170799
	sp|P19532|TFE3_HUMAN	TFE3	Transcription factor E3 OS=Homo sapiens OX=9606 GN=TFE3 PE=1 SV=4	2710	2	6.2586	6.56604	5.70242	5.98687	0.0691843	-0.203448	-0.134264	0.070228	-0.0640361
	sp|O60447-2|EVI5_HUMAN	EVI5	Isoform 2 of Ecotropic viral integration site 5 protein homolog OS=Homo sapiens OX=9606 GN=EVI5	3425	3	6.27923	6.58732	5.7042	6.18866	0.0691032	-0.207668	-0.138565	0.117603	-0.0209614
	sp|Q969V5|MUL1_HUMAN	MUL1	Mitochondrial ubiquitin ligase activator of NFKB 1 OS=Homo sapiens OX=9606 GN=MUL1 PE=1 SV=1	5133	2	6.20927	6.51389	6.63534	6.21152	0.0690957	0.0266499	0.0957456	-0.0952241	0.000521521
	sp|P54619-3|AAKG1_HUMAN	PRKAG1	Isoform 3 of 5'-AMP-activated protein kinase subunit gamma-1 OS=Homo sapiens OX=9606 GN=PRKAG1	393	9	6.98282	7.32519	6.74845	6.72004	0.0690571	-0.11831	-0.0492526	-0.00608671	-0.0553393
	sp|P25789|PSA4_HUMAN	PSMA4	Proteasome subunit alpha type-4 OS=Homo sapiens OX=9606 GN=PSMA4 PE=1 SV=1	2733	10	6.24386	6.54999	6.56236	6.30699	0.069053	0.00272167	0.0717747	-0.0572631	0.0145115
	sp|P35232|PHB_HUMAN	PHB	Prohibitin OS=Homo sapiens OX=9606 GN=PHB PE=1 SV=1	151	12	6.71493	7.04388	6.99639	6.64332	0.0689966	-0.00975791	0.0592387	-0.0747062	-0.0154676
	sp|Q9Y5B6|PAXB1_HUMAN	PAXBP1	PAX3- and PAX7-binding protein 1 OS=Homo sapiens OX=9606 GN=PAXBP1 PE=1 SV=2	2639	4	6.20564	6.50954	6.20817	6.16612	0.0689749	-0.068388	0.000586896	-0.00980277	-0.00921587
	sp|Q86WW8|COA5_HUMAN	COA5	Cytochrome c oxidase assembly factor 5 OS=Homo sapiens OX=9606 GN=COA5 PE=1 SV=1	4566	2	7.07386	7.41895	7.32282	6.29233	0.0687167	-0.0188154	0.0499013	-0.218804	-0.168902
	sp|P61221|ABCE1_HUMAN	ABCE1	ATP-binding cassette sub-family E member 1 OS=Homo sapiens OX=9606 GN=ABCE1 PE=1 SV=1	728	13	5.66024	5.9363	5.36405	5.77138	0.0687008	-0.14624	-0.0775392	0.105593	0.0280539
	sp|Q99766|ATP5S_HUMAN	DMAC2L	ATP synthase subunit s, mitochondrial OS=Homo sapiens OX=9606 GN=DMAC2L PE=1 SV=3	4978	4	6.48955	6.80577	6.94029	6.10016	0.0686392	0.0282386	0.0968779	-0.186149	-0.0892714
	sp|Q9BSJ8-2|ESYT1_HUMAN	ESYT1	Isoform 2 of Extended synaptotagmin-1 OS=Homo sapiens OX=9606 GN=ESYT1	2127	17	6.43196	6.74471	6.80401	6.0225	0.0684987	0.0126278	0.0811265	-0.176022	-0.0948952
	sp|Q8TED0|UTP15_HUMAN	UTP15	U3 small nucleolar RNA-associated protein 15 homolog OS=Homo sapiens OX=9606 GN=UTP15 PE=1 SV=3	2915	3	7.45721	7.81981	6.61252	7.24691	0.0684982	-0.241933	-0.173435	0.132165	-0.0412693
	sp|Q13444|ADA15_HUMAN	ADAM15	Disintegrin and metalloproteinase domain-containing protein 15 OS=Homo sapiens OX=9606 GN=ADAM15 PE=1 SV=4	426	3	6.67077	6.99474	7.89517	5.81623	0.0684172	0.174701	0.243118	-0.440887	-0.197769
	sp|Q9P2Y5|UVRAG_HUMAN	UVRAG	UV radiation resistance-associated gene protein OS=Homo sapiens OX=9606 GN=UVRAG PE=1 SV=1	4394	5	7.02651	7.36753	7.03107	6.73713	0.0683727	-0.0674367	0.000935963	-0.0616119	-0.0606759
	sp|P25788|PSA3_HUMAN	PSMA3	Proteasome subunit alpha type-3 OS=Homo sapiens OX=9606 GN=PSMA3 PE=1 SV=2	2873	13	6.76166	7.08978	7.06587	6.77927	0.0683648	-0.00487467	0.0634901	-0.059738	0.0037521
	sp|P25054|APC_HUMAN	APC	Adenomatous polyposis coli protein OS=Homo sapiens OX=9606 GN=APC PE=1 SV=2	2864	4	7.8076	8.18577	6.71301	5.87092	0.068239	-0.286158	-0.217919	-0.193374	-0.411294
	sp|P42338|PK3CB_HUMAN	PIK3CB	Phosphatidylinositol 4,5-bisphosphate 3-kinase catalytic subunit beta isoform OS=Homo sapiens OX=9606 GN=PIK3CB PE=1 SV=1	148	4	6.22204	6.52314	5.85044	5.61506	0.0681781	-0.157021	-0.0888429	-0.0592441	-0.148087
	sp|P51153|RAB13_HUMAN	RAB13	Ras-related protein Rab-13 OS=Homo sapiens OX=9606 GN=RAB13 PE=1 SV=1	4214	6	6.73504	7.06016	6.77048	6.95547	0.0680144	-0.0604428	0.0075716	0.0388899	0.0464615
	sp|P13073|COX41_HUMAN	COX4I1	Cytochrome c oxidase subunit 4 isoform 1, mitochondrial OS=Homo sapiens OX=9606 GN=COX4I1 PE=1 SV=1	1522	13	7.33876	7.69237	6.58197	6.63463	0.0678925	-0.22491	-0.157018	0.0114977	-0.14552
	sp|P62191|PRS4_HUMAN	PSMC1	26S proteasome regulatory subunit 4 OS=Homo sapiens OX=9606 GN=PSMC1 PE=1 SV=1	612	15	6.26875	6.5707	6.44306	6.6377	0.0678693	-0.0283011	0.0395683	0.0429381	0.0825064
	sp|Q9Y3D8|KAD6_HUMAN	AK6	Adenylate kinase isoenzyme 6 OS=Homo sapiens OX=9606 GN=AK6 PE=1 SV=1	4723	2	7.27225	7.62244	6.76729	7.35612	0.0678511	-0.171675	-0.103824	0.120368	0.0165439
	sp|Q13371|PHLP_HUMAN	PDCL	Phosducin-like protein OS=Homo sapiens OX=9606 GN=PDCL PE=1 SV=3	5631	2	6.92209	7.25539	7.29554	6.84717	0.0678441	0.00796161	0.0758057	-0.0915073	-0.0157016
	sp|Q9ULH0|KDIS_HUMAN	KIDINS220	Kinase D-interacting substrate of 220 kDa OS=Homo sapiens OX=9606 GN=KIDINS220 PE=1 SV=3	1357	5	6.47143	6.78157	6.11	6.42944	0.0675362	-0.150448	-0.0829122	0.0735215	-0.00939071
	sp|P28074|PSB5_HUMAN	PSMB5	Proteasome subunit beta type-5 OS=Homo sapiens OX=9606 GN=PSMB5 PE=1 SV=3	1739	10	2.89524	3.03398	3.30719	3.10598	0.0675254	0.124396	0.191921	-0.0905574	0.101364
	sp|Q8TB40|ABHD4_HUMAN	ABHD4	(Lyso)-N-acylphosphatidylethanolamine lipase OS=Homo sapiens OX=9606 GN=ABHD4 PE=2 SV=1	2230	3	6.25125	6.55065	7.97353	6.87658	0.0674933	0.283579	0.351073	-0.213527	0.137546
	sp|Q9UL63|MKLN1_HUMAN	MKLN1	Muskelin OS=Homo sapiens OX=9606 GN=MKLN1 PE=1 SV=2	2558	7	6.64813	6.96512	6.39756	6.66442	0.0671996	-0.122628	-0.0554279	0.0589579	0.00353001
	sp|P62424|RL7A_HUMAN	RPL7A	60S ribosomal protein L7a OS=Homo sapiens OX=9606 GN=RPL7A PE=1 SV=2	1493	9	7.22069	7.56435	6.5392	6.64622	0.0670781	-0.210102	-0.143024	0.0234203	-0.119603
	sp|Q01105|SET_HUMAN	SET	Protein SET OS=Homo sapiens OX=9606 GN=SET PE=1 SV=3	4675	6	6.08774	6.37655	5.86508	5.82362	0.0668709	-0.120627	-0.0537564	-0.0102321	-0.0639885
	sp|P42356|PI4KA_HUMAN	PI4KA	Phosphatidylinositol 4-kinase alpha OS=Homo sapiens OX=9606 GN=PI4KA PE=1 SV=4	1426	22	5.54184	5.80421	5.75272	6.98233	0.0667347	-0.0128546	0.0538801	0.279464	0.333344
	sp|O60524|NEMF_HUMAN	NEMF	Nuclear export mediator factor NEMF OS=Homo sapiens OX=9606 GN=NEMF PE=1 SV=4	160	10	6.68612	7.00259	6.9398	6.72523	0.0667187	-0.0129932	0.0537255	-0.0453101	0.00841543
	sp|Q8NHH9|ATLA2_HUMAN	ATL2	Atlastin-2 OS=Homo sapiens OX=9606 GN=ATL2 PE=1 SV=2	1796	4	6.04921	6.33385	6.97792	6.0169	0.066336	0.139715	0.206051	-0.213776	-0.00772437
	sp|Q9UH99|SUN2_HUMAN	SUN2	SUN domain-containing protein 2 OS=Homo sapiens OX=9606 GN=SUN2 PE=1 SV=3	955	16	5.32437	5.57453	6.86948	7.3386	0.0662385	0.301352	0.36759	0.0953046	0.462895
	tr|E7EVC7|E7EVC7_HUMAN	ATG16L1	Autophagy-related protein 16-1 OS=Homo sapiens OX=9606 GN=ATG16L1 PE=1 SV=1	2951	6	6.19428	6.48519	6.27788	6.50788	0.0662122	-0.0468714	0.0193409	0.0519102	0.0712511
	sp|Q96K37|S35E1_HUMAN	SLC35E1	Solute carrier family 35 member E1 OS=Homo sapiens OX=9606 GN=SLC35E1 PE=1 SV=2	2783	2	5.37464	5.62698	5.08938	5.16188	0.0661919	-0.144871	-0.0786792	0.0204076	-0.0582715
	sp|O95477|ABCA1_HUMAN	ABCA1	Phospholipid-transporting ATPase ABCA1 OS=Homo sapiens OX=9606 GN=ABCA1 PE=1 SV=3	815	3	6.70033	7.01419	6.12837	6.5077	0.0660436	-0.194774	-0.12873	0.0866447	-0.0420851
	sp|Q5JTH9|RRP12_HUMAN	RRP12	RRP12-like protein OS=Homo sapiens OX=9606 GN=RRP12 PE=1 SV=2	410	13	5.67272	5.93808	5.12441	5.14498	0.065955	-0.212611	-0.146656	0.00578003	-0.140876
	sp|P51178-2|PLCD1_HUMAN	PLCD1	Isoform 2 of 1-phosphatidylinositol 4,5-bisphosphate phosphodiesterase delta-1 OS=Homo sapiens OX=9606 GN=PLCD1	3206	11	6.72901	7.04317	6.95592	6.68871	0.0658314	-0.0179839	0.0478474	-0.056513	-0.00866555
	sp|Q9NWS0|PIHD1_HUMAN	PIH1D1	PIH1 domain-containing protein 1 OS=Homo sapiens OX=9606 GN=PIH1D1 PE=1 SV=1	5267	4	6.43317	6.73264	6.43082	6.79913	0.065644	-0.06617	-0.000525983	0.0803481	0.0798221
	sp|Q9H9A6|LRC40_HUMAN	LRRC40	Leucine-rich repeat-containing protein 40 OS=Homo sapiens OX=9606 GN=LRRC40 PE=1 SV=1	4861	12	5.67339	5.9358	6.37016	6.31109	0.0652314	0.101887	0.167118	-0.0134408	0.153677
	sp|Q96EK6|GNA1_HUMAN	GNPNAT1	Glucosamine 6-phosphate N-acetyltransferase OS=Homo sapiens OX=9606 GN=GNPNAT1 PE=1 SV=1	5153	10	6.00458	6.28096	6.50521	6.54592	0.064921	0.0506117	0.115533	0.00899887	0.124532
	sp|Q9Y4X5|ARI1_HUMAN	ARIH1	E3 ubiquitin-protein ligase ARIH1 OS=Homo sapiens OX=9606 GN=ARIH1 PE=1 SV=2	2855	13	6.7023	7.01046	6.78036	6.82515	0.0648528	-0.0481469	0.016706	0.00949747	0.0262034
	sp|Q9UET6|TRM7_HUMAN	FTSJ1	Putative tRNA (cytidine(32)/guanosine(34)-2'-O)-methyltransferase OS=Homo sapiens OX=9606 GN=FTSJ1 PE=1 SV=2	2847	3	6.89409	7.21105	7.10463	7.52839	0.0648506	-0.0214502	0.0434004	0.0835806	0.126981
	sp|Q9NUL7|DDX28_HUMAN	DDX28	Probable ATP-dependent RNA helicase DDX28 OS=Homo sapiens OX=9606 GN=DDX28 PE=1 SV=2	5710	3	6.98448	7.3054	7.43744	6.25284	0.0648112	0.0258432	0.0906544	-0.250295	-0.159641
	sp|Q13501|SQSTM_HUMAN	SQSTM1	Sequestosome-1 OS=Homo sapiens OX=9606 GN=SQSTM1 PE=1 SV=1	3431	10	7.36585	7.70415	7.37225	5.27821	0.0647844	-0.0635315	0.00125298	-0.482054	-0.480801
	sp|Q9NV70|EXOC1_HUMAN	EXOC1	Exocyst complex component 1 OS=Homo sapiens OX=9606 GN=EXOC1 PE=1 SV=4	3258	14	5.96295	6.23678	6.13601	6.04826	0.0647767	-0.0235005	0.0412762	-0.0207827	0.0204935
	sp|P62277|RS13_HUMAN	RPS13	40S ribosomal protein S13 OS=Homo sapiens OX=9606 GN=RPS13 PE=1 SV=2	5674	4	6.90528	7.2217	6.40545	6.71184	0.0646379	-0.173039	-0.108401	0.0674084	-0.0409927
	sp|Q99623|PHB2_HUMAN	PHB2	Prohibitin-2 OS=Homo sapiens OX=9606 GN=PHB2 PE=1 SV=2	420	17	5.69402	5.95452	5.98365	5.66563	0.0645393	0.00704097	0.0715803	-0.0787906	-0.00721033
	sp|P25685|DNJB1_HUMAN	DNAJB1	DnaJ homolog subfamily B member 1 OS=Homo sapiens OX=9606 GN=DNAJB1 PE=1 SV=4	1640	5	6.27566	6.5622	6.51123	7.11435	0.0644123	-0.0112509	0.0531614	0.127803	0.180964
	sp|Q8NI36|WDR36_HUMAN	WDR36	WD repeat-containing protein 36 OS=Homo sapiens OX=9606 GN=WDR36 PE=1 SV=1	4826	10	6.92232	7.23833	6.22934	6.53479	0.0644019	-0.216578	-0.152176	0.0690623	-0.0831141
	sp|Q96HY7|DHTK1_HUMAN	DHTKD1	Probable 2-oxoglutarate dehydrogenase E1 component DHKTD1, mitochondrial OS=Homo sapiens OX=9606 GN=DHTKD1 PE=1 SV=2	3856	10	5.31722	5.55955	6.36082	5.46911	0.064296	0.194244	0.25854	-0.217906	0.0406339
	sp|Q9Y3D0|CIA2B_HUMAN	CIAO2B	Cytosolic iron-sulfur assembly component 2B OS=Homo sapiens OX=9606 GN=CIAO2B PE=1 SV=1	6744	5	6.95411	7.27079	7.25021	6.91202	0.0642455	-0.00408968	0.0601559	-0.0689151	-0.00875919
	sp|O95630|STABP_HUMAN	STAMBP	STAM-binding protein OS=Homo sapiens OX=9606 GN=STAMBP PE=1 SV=1	5212	3	6.16527	6.44595	6.09025	7.15249	0.0642304	-0.0818935	-0.017663	0.231945	0.214282
	sp|Q9BSL1|UBAC1_HUMAN	UBAC1	Ubiquitin-associated domain-containing protein 1 OS=Homo sapiens OX=9606 GN=UBAC1 PE=1 SV=1	542	3	6.02038	6.29433	6.1518	5.88925	0.0641982	-0.0330458	0.0311525	-0.0629251	-0.0317727
	sp|Q96E29|MTEF3_HUMAN	MTERF3	Transcription termination factor 3, mitochondrial OS=Homo sapiens OX=9606 GN=MTERF3 PE=1 SV=2	2360	4	6.67586	6.97805	6.84204	6.61913	0.0638688	-0.0283957	0.0354732	-0.0477849	-0.0123117
	tr|B4DUC8|B4DUC8_HUMAN	MTAP	S-methyl-5'-thioadenosine phosphorylase OS=Homo sapiens OX=9606 GN=MTAP PE=1 SV=1	1078	13	6.53911	6.83488	6.51449	6.36496	0.0638224	-0.0692652	-0.00544279	-0.0335001	-0.0389428
	sp|Q14699|RFTN1_HUMAN	RFTN1	Raftlin OS=Homo sapiens OX=9606 GN=RFTN1 PE=1 SV=4	1334	11	5.74281	6.00222	8.22403	7.13976	0.0637394	0.45435	0.518089	-0.203971	0.314119
	sp|O15294|OGT1_HUMAN	OGT	UDP-N-acetylglucosamine--peptide N-acetylglucosaminyltransferase 110 kDa subunit OS=Homo sapiens OX=9606 GN=OGT PE=1 SV=3	1611	6	6.9153	7.22762	6.85841	6.89016	0.0637295	-0.0756462	-0.0119166	0.00666403	-0.00525261
	sp|Q92581-2|SL9A6_HUMAN	SLC9A6	Isoform 2 of Sodium/hydrogen exchanger 6 OS=Homo sapiens OX=9606 GN=SLC9A6	368	3	7.39925	7.7334	6.96203	6.41493	0.0637225	-0.151593	-0.087871	-0.118074	-0.205945
	tr|A0A087WX97|A0A087WX97_HUMAN	BCL2L13	Bcl-2-like protein 13 OS=Homo sapiens OX=9606 GN=BCL2L13 PE=1 SV=1	496	12	5.649	5.9035	6.09115	5.57203	0.0635742	0.0451445	0.108719	-0.128512	-0.0197933
	sp|Q9H497|TOR3A_HUMAN	TOR3A	Torsin-3A OS=Homo sapiens OX=9606 GN=TOR3A PE=1 SV=1	208	3	6.50517	6.79824	5.62724	5.84522	0.0635738	-0.272733	-0.209159	0.0548311	-0.154328
	sp|P09110|THIK_HUMAN	ACAA1	3-ketoacyl-CoA thiolase, peroxisomal OS=Homo sapiens OX=9606 GN=ACAA1 PE=1 SV=2	908	15	6.29904	6.58121	6.17916	4.9739	0.0632209	-0.0909425	-0.0277216	-0.313034	-0.340756
	sp|Q32P41|TRM5_HUMAN	TRMT5	tRNA (guanine(37)-N1)-methyltransferase OS=Homo sapiens OX=9606 GN=TRMT5 PE=1 SV=2	327	6	6.95554	7.26641	6.9572	6.74362	0.0630809	-0.0627356	0.000345307	-0.0449835	-0.0446382
	sp|P13612|ITA4_HUMAN	ITGA4	Integrin alpha-4 OS=Homo sapiens OX=9606 GN=ITGA4 PE=1 SV=3	706	13	2.66508	2.78406	4.28383	5.79994	0.0630079	0.621713	0.684721	0.437138	1.12186
	tr|G3V0E4|G3V0E4_HUMAN	PMPCB	Mitochondrial-processing peptidase subunit beta OS=Homo sapiens OX=9606 GN=PMPCB PE=1 SV=1	2866	9	5.87787	6.13908	6.12964	5.7697	0.0627282	-0.00222091	0.0605073	-0.0873065	-0.0267992
	sp|P15170-3|ERF3A_HUMAN	GSPT1	Isoform 3 of Eukaryotic peptide chain release factor GTP-binding subunit ERF3A OS=Homo sapiens OX=9606 GN=GSPT1	3075	13	6.34095	6.62212	6.63063	6.75324	0.0625949	0.0018528	0.0644477	0.0264339	0.0908816
	tr|Q5T5H1|Q5T5H1_HUMAN	ENSA	Alpha-endosulfine OS=Homo sapiens OX=9606 GN=ENSA PE=1 SV=1	6559	5	6.51058	6.79924	6.56224	6.70378	0.0625874	-0.0511851	0.0114023	0.0307857	0.042188
	tr|D3DWX8|D3DWX8_HUMAN	FAM3A	Family with sequence similarity 3, member A, isoform CRA_c OS=Homo sapiens OX=9606 GN=FAM3A PE=1 SV=1	4274	2	6.17248	6.44613	6.03723	6.29097	0.0625846	-0.0945461	-0.0319615	0.0593957	0.0274342
	sp|P61247|RS3A_HUMAN	RPS3A	40S ribosomal protein S3a OS=Homo sapiens OX=9606 GN=RPS3A PE=1 SV=2	718	13	4.74738	4.95782	4.58012	4.52998	0.0625724	-0.114318	-0.0517461	-0.0158818	-0.0676279
	sp|Q16836-2|HCDH_HUMAN	HADH	Isoform 2 of Hydroxyacyl-coenzyme A dehydrogenase, mitochondrial OS=Homo sapiens OX=9606 GN=HADH	1324	9	5.77838	6.03373	6.40717	6.61979	0.0623843	0.0866376	0.149022	0.0470975	0.196119
	sp|Q3KQV9|UAP1L_HUMAN	UAP1L1	UDP-N-acetylhexosamine pyrophosphorylase-like protein 1 OS=Homo sapiens OX=9606 GN=UAP1L1 PE=1 SV=2	313	13	7.20208	7.52031	7.2684	6.11123	0.0623798	-0.0491559	0.0132239	-0.250174	-0.23695
	sp|Q5T7W7|TSTD2_HUMAN	TSTD2	Thiosulfate sulfurtransferase/rhodanese-like domain-containing protein 2 OS=Homo sapiens OX=9606 GN=TSTD2 PE=1 SV=1	1124	2	7.67072	8.00965	6.45572	7.11229	0.062376	-0.311161	-0.248785	0.139737	-0.109048
	sp|Q9NPI6|DCP1A_HUMAN	DCP1A	mRNA-decapping enzyme 1A OS=Homo sapiens OX=9606 GN=DCP1A PE=1 SV=3	2393	4	7.27055	7.59149	7.23266	6.00898	0.0623173	-0.0698571	-0.00753983	-0.267405	-0.274945
	sp|P41227|NAA10_HUMAN	NAA10	N-alpha-acetyltransferase 10 OS=Homo sapiens OX=9606 GN=NAA10 PE=1 SV=1	2213	6	7.02643	7.33656	6.58679	6.49279	0.0623119	-0.155529	-0.0932167	-0.0207366	-0.113953
	sp|Q69YQ0|CYTSA_HUMAN	SPECC1L	Cytospin-A OS=Homo sapiens OX=9606 GN=SPECC1L PE=1 SV=2	283	14	6.89422	7.19759	5.78294	7.46205	0.0621259	-0.31571	-0.253584	0.367769	0.114186
	sp|Q9BQP7|MGME1_HUMAN	MGME1	Mitochondrial genome maintenance exonuclease 1 OS=Homo sapiens OX=9606 GN=MGME1 PE=1 SV=1	5213	6	7.56532	7.8982	6.83076	6.31246	0.0621228	-0.209478	-0.147355	-0.113842	-0.261197
	sp|Q8IZA0|K319L_HUMAN	KIAA0319L	Dyslexia-associated protein KIAA0319-like protein OS=Homo sapiens OX=9606 GN=KIAA0319L PE=1 SV=2	4924	3	7.47616	7.80476	6.75098	6.82571	0.0620562	-0.209258	-0.147202	0.0158822	-0.131319
	tr|M0QXZ5|M0QXZ5_HUMAN	ZNF428	Zinc finger protein 428 (Fragment) OS=Homo sapiens OX=9606 GN=ZNF428 PE=1 SV=1	1908	2	6.95829	7.26404	7.08855	7.40085	0.0620387	-0.0352799	0.0267588	0.0621994	0.0889582
	sp|Q9BVP2|GNL3_HUMAN	GNL3	Guanine nucleotide-binding protein-like 3 OS=Homo sapiens OX=9606 GN=GNL3 PE=1 SV=2	3205	11	7.00769	7.31553	6.42178	6.31898	0.0620241	-0.187989	-0.125965	-0.0232808	-0.149246
	sp|Q14703|MBTP1_HUMAN	MBTPS1	Membrane-bound transcription factor site-1 protease OS=Homo sapiens OX=9606 GN=MBTPS1 PE=1 SV=1	4529	5	7.02234	7.32937	7.20389	6.86075	0.0617387	-0.0249134	0.0368253	-0.0704102	-0.0335849
	sp|P40222|TXLNA_HUMAN	TXLNA	Alpha-taxilin OS=Homo sapiens OX=9606 GN=TXLNA PE=1 SV=3	1965	9	7.17701	7.4907	6.61939	6.43152	0.0617163	-0.178403	-0.116686	-0.0415374	-0.158224
	sp|O43815|STRN_HUMAN	STRN	Striatin OS=Homo sapiens OX=9606 GN=STRN PE=1 SV=4	822	10	6.12199	6.38917	6.46681	6.27473	0.0616286	0.0174246	0.0790532	-0.0434997	0.0355535
	sp|Q02750|MP2K1_HUMAN	MAP2K1	Dual specificity mitogen-activated protein kinase kinase 1 OS=Homo sapiens OX=9606 GN=MAP2K1 PE=1 SV=2	4854	4	6.82757	7.12469	7.23498	7.36669	0.0614543	0.0221611	0.0836155	0.0260282	0.109644
	sp|Q13825|AUHM_HUMAN	AUH	Methylglutaconyl-CoA hydratase, mitochondrial OS=Homo sapiens OX=9606 GN=AUH PE=1 SV=1	1635	7	6.77244	7.06712	7.48401	6.78864	0.0614481	0.0826881	0.144136	-0.140689	0.00344758
	sp|Q9Y4B6|DCAF1_HUMAN	DCAF1	DDB1- and CUL4-associated factor 1 OS=Homo sapiens OX=9606 GN=DCAF1 PE=1 SV=3	776	2	5.96967	6.22907	5.28425	5.29649	0.061364	-0.237316	-0.175952	0.00333515	-0.172617
	sp|Q5JPH6|SYEM_HUMAN	EARS2	Probable glutamate--tRNA ligase, mitochondrial OS=Homo sapiens OX=9606 GN=EARS2 PE=1 SV=2	2503	9	6.66973	6.95935	7.36383	7.18931	0.0613242	0.0815024	0.142827	-0.0346034	0.108223
	sp|P18433|PTPRA_HUMAN	PTPRA	Receptor-type tyrosine-protein phosphatase alpha OS=Homo sapiens OX=9606 GN=PTPRA PE=1 SV=3	4028	3	4.23594	4.41963	4.72157	5.93593	0.0612445	0.0953415	0.156586	0.330206	0.486792
	sp|P14735|IDE_HUMAN	IDE	Insulin-degrading enzyme OS=Homo sapiens OX=9606 GN=IDE PE=1 SV=4	944	12	6.37215	6.64809	6.56534	6.63956	0.0611597	-0.0180702	0.0430895	0.0162183	0.0593077
	sp|Q4G176|ACSF3_HUMAN	ACSF3	Malonate--CoA ligase ACSF3, mitochondrial OS=Homo sapiens OX=9606 GN=ACSF3 PE=1 SV=3	3027	9	5.89035	6.14529	6.92989	6.49858	0.0611261	0.173353	0.234479	-0.0927086	0.14177
	tr|I6L894|I6L894_HUMAN	ANK2	Ankyrin-2 OS=Homo sapiens OX=9606 GN=ANK2 PE=1 SV=1	1465	17	5.59025	5.83196	6.59508	6.23709	0.0610688	0.177408	0.238477	-0.0805175	0.157959
	sp|Q13426|XRCC4_HUMAN	XRCC4	DNA repair protein XRCC4 OS=Homo sapiens OX=9606 GN=XRCC4 PE=1 SV=2	2001	7	6.80913	7.1034	5.91966	6.47796	0.0610406	-0.262996	-0.201955	0.130025	-0.0719302
	sp|P52434-4|RPAB3_HUMAN	POLR2H	Isoform 4 of DNA-directed RNA polymerases I, II, and III subunit RPABC3 OS=Homo sapiens OX=9606 GN=POLR2H	786	2	7.31154	7.6271	6.58511	7.83671	0.0609606	-0.211928	-0.150967	0.251041	0.100074
	sp|P10768|ESTD_HUMAN	ESD	S-formylglutathione hydrolase OS=Homo sapiens OX=9606 GN=ESD PE=1 SV=2	1245	8	6.7966	7.08866	7.05138	6.39611	0.060699	-0.00760697	0.0530921	-0.140709	-0.0876173
	sp|P09132|SRP19_HUMAN	SRP19	Signal recognition particle 19 kDa protein OS=Homo sapiens OX=9606 GN=SRP19 PE=1 SV=3	2872	4	4.63736	4.8363	4.56896	4.46035	0.060598	-0.082038	-0.02144	-0.0347095	-0.0561495
	sp|Q9BV44|THUM3_HUMAN	THUMPD3	THUMP domain-containing protein 3 OS=Homo sapiens OX=9606 GN=THUMPD3 PE=1 SV=1	373	7	6.14967	6.41283	6.28252	6.20526	0.0604529	-0.0296174	0.0308355	-0.0178521	0.0129834
	sp|P15880|RS2_HUMAN	RPS2	40S ribosomal protein S2 OS=Homo sapiens OX=9606 GN=RPS2 PE=1 SV=2	1268	16	1.48347	1.54683	1.3703	1.41511	0.0603388	-0.174826	-0.114487	0.0464224	-0.0680648
	sp|Q12931|TRAP1_HUMAN	TRAP1	Heat shock protein 75 kDa, mitochondrial OS=Homo sapiens OX=9606 GN=TRAP1 PE=1 SV=3	723	14	6.61251	6.89441	6.69159	6.17553	0.0602291	-0.043078	0.0171511	-0.115786	-0.098635
	sp|Q13616|CUL1_HUMAN	CUL1	Cullin-1 OS=Homo sapiens OX=9606 GN=CUL1 PE=1 SV=2	3214	8	6.71884	7.00515	6.80719	6.9908	0.0602045	-0.0413573	0.0188472	0.0383982	0.0572454
	sp|Q9NZI8|IF2B1_HUMAN	IGF2BP1	Insulin-like growth factor 2 mRNA-binding protein 1 OS=Homo sapiens OX=9606 GN=IGF2BP1 PE=1 SV=2	1059	8	3.11536	3.24792	3.92809	3.44462	0.0601173	0.274311	0.334428	-0.189483	0.144945
	sp|Q5MNZ9|WIPI1_HUMAN	WIPI1	WD repeat domain phosphoinositide-interacting protein 1 OS=Homo sapiens OX=9606 GN=WIPI1 PE=1 SV=3	5596	4	7.41644	7.73164	6.94336	6.44781	0.060047	-0.155139	-0.0950922	-0.106825	-0.201918
	sp|Q2M2I8|AAK1_HUMAN	AAK1	AP2-associated protein kinase 1 OS=Homo sapiens OX=9606 GN=AAK1 PE=1 SV=3	4507	10	6.2709	6.53715	6.52289	6.43994	0.0599893	-0.00315161	0.0568377	-0.0184637	0.038374
	sp|P56192|SYMC_HUMAN	MARS	Methionine--tRNA ligase, cytoplasmic OS=Homo sapiens OX=9606 GN=MARS PE=1 SV=2	168	17	7.25337	7.56102	6.25166	6.94441	0.0599281	-0.274341	-0.214413	0.151613	-0.0628
	sp|Q16643-3|DREB_HUMAN	DBN1	Isoform 3 of Drebrin OS=Homo sapiens OX=9606 GN=DBN1	57	18	5.50092	5.73362	6.11528	8.62233	0.0597725	0.0929731	0.152746	0.495659	0.648405
	sp|Q03001|DYST_HUMAN	DST	Dystonin OS=Homo sapiens OX=9606 GN=DST PE=1 SV=4	130	27	6.3619	6.63092	5.69979	7.67596	0.0597506	-0.2183	-0.158549	0.429437	0.270888
	sp|P47985|UCRI_HUMAN	UQCRFS1	Cytochrome b-c1 complex subunit Rieske, mitochondrial OS=Homo sapiens OX=9606 GN=UQCRFS1 PE=1 SV=2	4785	8	4.60523	4.79987	5.13484	4.32543	0.0597221	0.097324	0.157046	-0.247477	-0.0904313
	sp|Q8N1B4|VPS52_HUMAN	VPS52	Vacuolar protein sorting-associated protein 52 homolog OS=Homo sapiens OX=9606 GN=VPS52 PE=1 SV=1	3637	11	6.82558	7.11387	6.84441	7.5349	0.0596836	-0.0557091	0.00397454	0.138661	0.142636
	sp|O15031|PLXB2_HUMAN	PLXNB2	Plexin-B2 OS=Homo sapiens OX=9606 GN=PLXNB2 PE=1 SV=3	889	20	6.20382	6.46557	6.1042	7.37641	0.0596223	-0.0829757	-0.0233534	0.273117	0.249764
	sp|Q969X6|UTP4_HUMAN	UTP4	U3 small nucleolar RNA-associated protein 4 homolog OS=Homo sapiens OX=9606 GN=UTP4 PE=1 SV=1	2739	8	7.04406	7.34092	5.97666	6.49038	0.0595537	-0.296621	-0.237068	0.118964	-0.118104
	sp|Q8N3Y1|FBXW8_HUMAN	FBXW8	F-box/WD repeat-containing protein 8 OS=Homo sapiens OX=9606 GN=FBXW8 PE=1 SV=2	3071	3	6.53967	6.81494	7.65443	7.00479	0.0594839	0.167594	0.227078	-0.127952	0.0991257
	sp|O95568|MET18_HUMAN	METTL18	Histidine protein methyltransferase 1 homolog OS=Homo sapiens OX=9606 GN=METTL18 PE=1 SV=1	1567	2	2.40483	2.50583	2.47752	2.44291	0.0593575	-0.0163938	0.0429638	-0.0202989	0.0226648
	sp|P62495|ERF1_HUMAN	ETF1	Eukaryotic peptide chain release factor subunit 1 OS=Homo sapiens OX=9606 GN=ETF1 PE=1 SV=3	5304	13	5.78944	6.03222	5.89158	6.22073	0.0592661	-0.0340336	0.0252324	0.0784296	0.103662
	sp|P78362-2|SRPK2_HUMAN	SRPK2	Isoform 2 of SRSF protein kinase 2 OS=Homo sapiens OX=9606 GN=SRPK2	111	5	7.23049	7.53358	6.85222	7.29725	0.0592428	-0.136764	-0.0775216	0.0907827	0.0132611
	sp|Q9NV35|NUD15_HUMAN	NUDT15	Nucleotide triphosphate diphosphatase NUDT15 OS=Homo sapiens OX=9606 GN=NUDT15 PE=1 SV=1	4989	3	6.51989	6.79294	6.6487	6.83059	0.0591899	-0.0309656	0.0282243	0.038939	0.0671633
	sp|Q14667|K0100_HUMAN	KIAA0100	Protein KIAA0100 OS=Homo sapiens OX=9606 GN=KIAA0100 PE=1 SV=3	3040	2	4.80505	5.00463	5.0637	5.32121	0.0587129	0.016929	0.0756419	0.071561	0.147203
	sp|Q9UHN1|DPOG2_HUMAN	POLG2	DNA polymerase subunit gamma-2, mitochondrial OS=Homo sapiens OX=9606 GN=POLG2 PE=1 SV=1	6467	2	6.92333	7.20966	7.33261	6.80268	0.0584651	0.0243939	0.082859	-0.108223	-0.0253636
	sp|O75063|XYLK_HUMAN	FAM20B	Glycosaminoglycan xylosylkinase OS=Homo sapiens OX=9606 GN=FAM20B PE=1 SV=1	1977	3	6.67089	6.9464	6.5125	6.07272	0.0583877	-0.0930543	-0.0346667	-0.10087	-0.135537
	sp|Q12840|KIF5A_HUMAN	KIF5A	Kinesin heavy chain isoform 5A OS=Homo sapiens OX=9606 GN=KIF5A PE=1 SV=2	1849	5	6.57622	6.84677	6.49554	7.04338	0.058165	-0.0759744	-0.0178095	0.116819	0.0990096
	sp|P62899|RL31_HUMAN	RPL31	60S ribosomal protein L31 OS=Homo sapiens OX=9606 GN=RPL31 PE=1 SV=1	4947	5	6.92297	7.20768	6.45571	6.71547	0.0581432	-0.15896	-0.100817	0.0569144	-0.0439023
	sp|Q9Y2R4|DDX52_HUMAN	DDX52	Probable ATP-dependent RNA helicase DDX52 OS=Homo sapiens OX=9606 GN=DDX52 PE=1 SV=3	5616	2	7.08559	7.37577	5.85274	6.44674	0.057905	-0.333681	-0.275776	0.139457	-0.136319
	sp|Q5VW32|BROX_HUMAN	BROX	BRO1 domain-containing protein BROX OS=Homo sapiens OX=9606 GN=BROX PE=1 SV=1	2729	3	5.94429	6.1874	6.63788	6.57676	0.057828	0.101389	0.159217	-0.0133459	0.145871
	sp|Q96I51|RCC1L_HUMAN	RCC1L	RCC1-like G exchanging factor-like protein OS=Homo sapiens OX=9606 GN=RCC1L PE=1 SV=2	1557	8	6.04602	6.29309	6.88454	5.47588	0.0577836	0.129591	0.187375	-0.330271	-0.142896
	sp|P53778|MK12_HUMAN	MAPK12	Mitogen-activated protein kinase 12 OS=Homo sapiens OX=9606 GN=MAPK12 PE=1 SV=3	358	4	7.33362	7.63289	7.2808	5.70784	0.0577032	-0.0681328	-0.0104295	-0.351152	-0.361581
	sp|Q96FN9|DTD2_HUMAN	DTD2	D-aminoacyl-tRNA deacylase 2 OS=Homo sapiens OX=9606 GN=DTD2 PE=1 SV=1	6221	2	6.67597	6.94828	7.7517	6.30852	0.057677	0.157858	0.215535	-0.297211	-0.0816766
	sp|Q8IW35-2|CEP97_HUMAN	CEP97	Isoform 2 of Centrosomal protein of 97 kDa OS=Homo sapiens OX=9606 GN=CEP97	1114	4	7.10216	7.39109	7.08671	7	0.05753	-0.0606708	-0.00314083	-0.0177625	-0.0209033
	sp|Q06787-9|FMR1_HUMAN	FMR1	Isoform 9 of Synaptic functional regulator FMR1 OS=Homo sapiens OX=9606 GN=FMR1	1675	4	7.03489	7.32052	7.17382	6.94542	0.0574176	-0.0292036	0.028214	-0.0466806	-0.0184666
	sp|P49720|PSB3_HUMAN	PSMB3	Proteasome subunit beta type-3 OS=Homo sapiens OX=9606 GN=PSMB3 PE=1 SV=2	3570	13	6.65289	6.92286	6.47436	6.58216	0.057387	-0.096632	-0.0392451	0.0238232	-0.0154219
	sp|O15254|ACOX3_HUMAN	ACOX3	Peroxisomal acyl-coenzyme A oxidase 3 OS=Homo sapiens OX=9606 GN=ACOX3 PE=1 SV=2	3610	12	7.09076	7.3781	6.94445	4.91707	0.0573084	-0.0873876	-0.0300791	-0.498062	-0.528141
	sp|Q8NBZ7-2|UXS1_HUMAN	UXS1	Isoform 2 of UDP-glucuronic acid decarboxylase 1 OS=Homo sapiens OX=9606 GN=UXS1	5949	4	7.1582	7.44775	6.97272	7.1729	0.0572085	-0.0950821	-0.0378736	0.0408339	0.00296034
	sp|Q9UER7|DAXX_HUMAN	DAXX	Death domain-associated protein 6 OS=Homo sapiens OX=9606 GN=DAXX PE=1 SV=2	6209	2	6.59797	6.86291	5.80209	7.49022	0.0567982	-0.242249	-0.185451	0.368437	0.182986
	sp|P17980|PRS6A_HUMAN	PSMC3	26S proteasome regulatory subunit 6A OS=Homo sapiens OX=9606 GN=PSMC3 PE=1 SV=3	564	17	6.89068	7.16728	6.80408	7.06082	0.056778	-0.0750246	-0.0182466	0.0534363	0.0351897
	sp|O95985|TOP3B_HUMAN	TOP3B	DNA topoisomerase 3-beta-1 OS=Homo sapiens OX=9606 GN=TOP3B PE=1 SV=1	5935	3	6.48085	6.74063	6.16924	6.28521	0.0567004	-0.12779	-0.0710899	0.0268686	-0.0442214
	sp|P00846|ATP6_HUMAN	MT-ATP6	ATP synthase subunit a OS=Homo sapiens OX=9606 GN=MT-ATP6 PE=1 SV=1	6311	2	6.71849	6.98776	7.32709	7.45935	0.0566924	0.0684116	0.125104	0.0258089	0.150913
	sp|P00519-2|ABL1_HUMAN	ABL1	Isoform IB of Tyrosine-protein kinase ABL1 OS=Homo sapiens OX=9606 GN=ABL1	2811	8	5.74289	5.9727	5.90904	6.7326	0.0566072	-0.0154599	0.0411473	0.18824	0.229388
	sp|P25787|PSA2_HUMAN	PSMA2	Proteasome subunit alpha type-2 OS=Homo sapiens OX=9606 GN=PSMA2 PE=1 SV=2	367	10	3.89149	4.04703	4.03602	3.86011	0.0565408	-0.00392962	0.0526112	-0.0642913	-0.0116801
	sp|Q9UBI6|GBG12_HUMAN	GNG12	Guanine nucleotide-binding protein G(I)/G(S)/G(O) subunit gamma-12 OS=Homo sapiens OX=9606 GN=GNG12 PE=1 SV=3	2572	5	6.43736	6.69256	6.85585	9.73757	0.0560898	0.034777	0.0908668	0.506227	0.597094
	tr|A6NIW2|A6NIW2_HUMAN	DOCK11	Dedicator of cytokinesis protein 11 OS=Homo sapiens OX=9606 GN=DOCK11 PE=1 SV=2	1056	12	4.83287	5.02382	6.49836	6.49951	0.0559036	0.371291	0.427194	0.000255288	0.42745
	tr|H0Y368|H0Y368_HUMAN	DPM1	Dolichol-phosphate mannosyltransferase subunit 1 (Fragment) OS=Homo sapiens OX=9606 GN=DPM1 PE=1 SV=1	4738	6	6.2418	6.48841	6.24983	6.35491	0.0559021	-0.0540473	0.00185482	0.024054	0.0259088
	sp|Q9BTE3|MCMBP_HUMAN	MCMBP	Mini-chromosome maintenance complex-binding protein OS=Homo sapiens OX=9606 GN=MCMBP PE=1 SV=2	3319	4	7.21677	7.50118	6.95719	7.0515	0.0557643	-0.108614	-0.0528496	0.0194258	-0.0334238
	sp|P11171|41_HUMAN	EPB41	Protein 4.1 OS=Homo sapiens OX=9606 GN=EPB41 PE=1 SV=4	2355	5	4.7393	4.92569	5.61868	4.20659	0.0556518	0.189905	0.245557	-0.417581	-0.172024
	tr|A0A1B0GTF3|A0A1B0GTF3_HUMAN	HSPA12A	Heat shock 70 kDa protein 12A OS=Homo sapiens OX=9606 GN=HSPA12A PE=1 SV=1	533	14	5.34209	5.55201	5.31601	6.99708	0.0556059	-0.0626673	-0.00706137	0.396409	0.389348
	sp|P35580-3|MYH10_HUMAN	MYH10	Isoform 3 of Myosin-10 OS=Homo sapiens OX=9606 GN=MYH10	179	29	6.73464	6.99911	7.21665	6.09214	0.0555693	0.0441582	0.0997274	-0.24438	-0.144652
	sp|Q9NWY4|HPF1_HUMAN	HPF1	Histone PARylation factor 1 OS=Homo sapiens OX=9606 GN=HPF1 PE=1 SV=2	4908	4	5.95409	6.18761	5.96674	6.41453	0.055502	-0.0524405	0.00306148	0.1044	0.107461
	sp|Q9Y676|RT18B_HUMAN	MRPS18B	28S ribosomal protein S18b, mitochondrial OS=Homo sapiens OX=9606 GN=MRPS18B PE=1 SV=1	2426	6	6.39594	6.64635	7.11902	5.82181	0.0554058	0.0991167	0.154523	-0.290211	-0.135688
	sp|Q16540|RM23_HUMAN	MRPL23	39S ribosomal protein L23, mitochondrial OS=Homo sapiens OX=9606 GN=MRPL23 PE=1 SV=1	3695	8	6.75219	7.01617	7.56944	5.48651	0.0553275	0.109502	0.16483	-0.464297	-0.299467
	sp|Q8TEQ0|SNX29_HUMAN	SNX29	Sorting nexin-29 OS=Homo sapiens OX=9606 GN=SNX29 PE=1 SV=3	3126	3	5.9883	6.22192	6.59812	7.15731	0.0552133	0.0846951	0.139908	0.117361	0.257269
	sp|Q8NBJ4|GOLM1_HUMAN	GOLM1	Golgi membrane protein 1 OS=Homo sapiens OX=9606 GN=GOLM1 PE=1 SV=1	4190	12	6.57736	6.83369	7.20581	6.25584	0.0551547	0.0764968	0.131652	-0.203956	-0.0723046
	sp|Q96AY4|TTC28_HUMAN	TTC28	Tetratricopeptide repeat protein 28 OS=Homo sapiens OX=9606 GN=TTC28 PE=1 SV=4	1121	18	5.18254	5.38443	5.72266	7.00278	0.0551343	0.0878936	0.143028	0.291241	0.434269
	sp|Q8IUW5|RELL1_HUMAN	RELL1	RELT-like protein 1 OS=Homo sapiens OX=9606 GN=RELL1 PE=1 SV=1	3453	2	6.53494	6.78944	6.90934	7.48942	0.0551179	0.025255	0.0803728	0.116307	0.19668
	sp|Q9NP77|SSU72_HUMAN	SSU72	RNA polymerase II subunit A C-terminal domain phosphatase SSU72 OS=Homo sapiens OX=9606 GN=SSU72 PE=1 SV=1	3987	4	7.06607	7.34094	7.08712	7.12812	0.0550554	-0.0507647	0.00429076	0.00832215	0.0126129
	sp|P11940|PABP1_HUMAN	PABPC1	Polyadenylate-binding protein 1 OS=Homo sapiens OX=9606 GN=PABPC1 PE=1 SV=2	1828	12	7.16643	7.44485	6.79971	6.61389	0.0549888	-0.130771	-0.0757821	-0.0399724	-0.115754
	sp|Q8NEZ2|VP37A_HUMAN	VPS37A	Vacuolar protein sorting-associated protein 37A OS=Homo sapiens OX=9606 GN=VPS37A PE=1 SV=1	6613	2	5.72779	5.95013	5.51085	5.6201	0.0549442	-0.110648	-0.0557038	0.0283218	-0.027382
	sp|P23258|TBG1_HUMAN	TUBG1	Tubulin gamma-1 chain OS=Homo sapiens OX=9606 GN=TUBG1 PE=1 SV=2	2938	7	6.41781	6.66644	6.72087	6.24575	0.0548369	0.01173	0.066567	-0.105772	-0.0392055
	sp|Q96EI5-2|TCAL4_HUMAN	TCEAL4	Isoform 2 of Transcription elongation factor A protein-like 4 OS=Homo sapiens OX=9606 GN=TCEAL4	4464	4	6.46765	6.71642	6.51654	6.08608	0.0544508	-0.0435881	0.0108627	-0.0985918	-0.0877291
	tr|S4R3N1|S4R3N1_HUMAN	HSPE1-MOB4	HSPE1-MOB4 readthrough OS=Homo sapiens OX=9606 GN=HSPE1-MOB4 PE=3 SV=1	667	11	1.14015	1.18395	1.28613	1.33954	0.0543837	0.119432	0.173816	0.058703	0.232519
	tr|F5H1S1|F5H1S1_HUMAN	PIGB	Mannosyltransferase OS=Homo sapiens OX=9606 GN=PIGB PE=1 SV=2	5372	2	6.23225	6.47099	7.31229	6.43107	0.0542341	0.176336	0.23057	-0.185264	0.0453057
	sp|O75884|RBBP9_HUMAN	RBBP9	Putative hydrolase RBBP9 OS=Homo sapiens OX=9606 GN=RBBP9 PE=1 SV=2	2256	5	6.21594	6.45396	6.84047	6.91324	0.0542121	0.0839098	0.138122	0.0152676	0.153389
	sp|P37108|SRP14_HUMAN	SRP14	Signal recognition particle 14 kDa protein OS=Homo sapiens OX=9606 GN=SRP14 PE=1 SV=2	2290	8	5.07846	5.27289	5.09086	4.96686	0.0542029	-0.0506822	0.00352068	-0.0355782	-0.0320575
	sp|Q7Z7G8|VP13B_HUMAN	VPS13B	Vacuolar protein sorting-associated protein 13B OS=Homo sapiens OX=9606 GN=VPS13B PE=1 SV=2	1213	3	5.74115	5.96022	5.31505	5.35497	0.054025	-0.165282	-0.111257	0.010797	-0.10046
	sp|Q99733-2|NP1L4_HUMAN	NAP1L4	Isoform 2 of Nucleosome assembly protein 1-like 4 OS=Homo sapiens OX=9606 GN=NAP1L4	66	15	6.14884	6.38341	6.3154	5.97987	0.0540138	-0.0154528	0.038561	-0.0787604	-0.0401994
	sp|O60287|NPA1P_HUMAN	URB1	Nucleolar pre-ribosomal-associated protein 1 OS=Homo sapiens OX=9606 GN=URB1 PE=1 SV=4	2883	3	7.23355	7.5094	7.03671	6.77545	0.0539925	-0.0937963	-0.0398038	-0.0545839	-0.0943877
	sp|Q96RL7|VP13A_HUMAN	VPS13A	Vacuolar protein sorting-associated protein 13A OS=Homo sapiens OX=9606 GN=VPS13A PE=1 SV=2	171	9	6.96874	7.23346	6.16523	6.72155	0.0537894	-0.230533	-0.176743	0.12464	-0.0521032
	sp|P82909|RT36_HUMAN	MRPS36	28S ribosomal protein S36, mitochondrial OS=Homo sapiens OX=9606 GN=MRPS36 PE=1 SV=2	6452	6	6.2859	6.52459	7.16561	6.69314	0.0537679	0.135203	0.188971	-0.0984073	0.0905639
	tr|J3QTA2|J3QTA2_HUMAN	BAG1	BAG family molecular chaperone regulator 1 OS=Homo sapiens OX=9606 GN=BAG1 PE=1 SV=1	2769	6	6.7198	6.97458	6.86444	6.59802	0.0536873	-0.0229647	0.0307227	-0.0571074	-0.0263848
	sp|P62249|RS16_HUMAN	RPS16	40S ribosomal protein S16 OS=Homo sapiens OX=9606 GN=RPS16 PE=1 SV=2	2140	10	7.21687	7.49003	6.65649	6.89923	0.0535989	-0.17021	-0.116611	0.0516734	-0.0649379
	sp|Q13136|LIPA1_HUMAN	PPFIA1	Liprin-alpha-1 OS=Homo sapiens OX=9606 GN=PPFIA1 PE=1 SV=1	4191	8	6.53302	6.7796	6.34655	6.34451	0.0534508	-0.0952284	-0.0417775	-0.000463049	-0.0422406
	sp|O75915|PRAF3_HUMAN	ARL6IP5	PRA1 family protein 3 OS=Homo sapiens OX=9606 GN=ARL6IP5 PE=1 SV=1	3042	8	6.82891	7.08565	6.9101	6.87463	0.0532449	-0.0361936	0.0170513	-0.00742522	0.00962604
	sp|Q5T440|CAF17_HUMAN	IBA57	Putative transferase CAF17, mitochondrial OS=Homo sapiens OX=9606 GN=IBA57 PE=1 SV=1	1456	9	6.13575	6.36629	6.63232	6.52443	0.0532147	0.0590593	0.112274	-0.023661	0.0886129
	sp|Q13641|TPBG_HUMAN	TPBG	Trophoblast glycoprotein OS=Homo sapiens OX=9606 GN=TPBG PE=1 SV=1	4343	5	6.23173	6.46536	6.58238	6.96396	0.053098	0.0258779	0.0789759	0.0812983	0.160274
	sp|Q08379|GOGA2_HUMAN	GOLGA2	Golgin subfamily A member 2 OS=Homo sapiens OX=9606 GN=GOLGA2 PE=1 SV=3	155	13	5.53264	5.73914	5.51624	5.88703	0.0528674	-0.0571497	-0.00428239	0.0938543	0.0895719
	sp|Q7Z6Z7|HUWE1_HUMAN	HUWE1	E3 ubiquitin-protein ligase HUWE1 OS=Homo sapiens OX=9606 GN=HUWE1 PE=1 SV=3	1085	32	6.36819	6.60554	6.29369	6.89145	0.0527924	-0.0697704	-0.016978	0.1309	0.113922
	sp|P12036|NFH_HUMAN	NEFH	Neurofilament heavy polypeptide OS=Homo sapiens OX=9606 GN=NEFH PE=1 SV=4	806	8	4.12213	4.27493	5.34548	6.39453	0.0525119	0.322418	0.37493	0.258518	0.633448
	sp|Q9H3H3-3|CK068_HUMAN	C11orf68	Isoform 3 of UPF0696 protein C11orf68 OS=Homo sapiens OX=9606 GN=C11orf68	3307	4	6.44347	6.68141	7.13665	6.97052	0.0523147	0.0950937	0.147408	-0.0339807	0.113428
[truncated: 4,016 more rows]
